# Supplementary material for: Catalytic photochemical enantioselective α-alkylation with pyridinium salts
Source: Royal Society of Chemistry journal article supplement (doi:10.1039/d2sc05654b), 2022-12-08
Supplement: d2sc05654b1.pdf [file d2sc05654b1.pdf]

## Supporting Information

### Catalytic Photochemical Enantioselective $\alpha$ -Alkylation with Pyridinium Salts

Santhivardhana Reddy Yetra, Nathan Schmitt, and Uttam K. Tambar\*

Department of Biochemistry, The University of Texas Southwestern Medical Center, 5323 Harry  
Hines Boulevard, Dallas, Texas 75390-9038, United States

Email: [Uttam.Tambar@utsouthwestern.edu](mailto:Uttam.Tambar@utsouthwestern.edu)

#### Contents:

|                                                                                                                                          |             |
|------------------------------------------------------------------------------------------------------------------------------------------|-------------|
| <b>1. General Information.....</b>                                                                                                       | <b>S2</b>   |
| <b>2. Synthesis and Characterization of Pyridinium Substrates .....</b>                                                                  | <b>S2</b>   |
| <b>3. Optimization Studies.....</b>                                                                                                      | <b>S12</b>  |
| <b>4. General Procedures for Catalytic Photochemical Enantioselective <math>\alpha</math>-<br/>Alkylation with Pyridinium Salts.....</b> | <b>S14</b>  |
| <b>5. Characterization Data for Products.....</b>                                                                                        | <b>S17</b>  |
| <b>6. Mechanistic Studies.....</b>                                                                                                       | <b>S34</b>  |
| <b>7. Synthesis of (-)-Enterolactone and (-)-Enterodiol .....</b>                                                                        | <b>S44</b>  |
| <b>8. References.....</b>                                                                                                                | <b>S46</b>  |
| <b>9. NMR Spectra.....</b>                                                                                                               | <b>S47</b>  |
| <b>10. HPLC Charts.....</b>                                                                                                              | <b>S113</b> |

## 1. General Information

All reactions were carried out in capped reaction vials with magnetic stirring unless otherwise indicated. Commercially obtained reagents were used as received. Solvents were dried by passage through an activated alumina column under argon. Liquids and solutions were transferred via syringe. All reactions were monitored by thin-layer chromatography with E. Merck silica gel 60 F254 pre-coated plates (0.25 mm). Silica gel (particle size 0.032 - 0.063 mm) purchased from SiliCycle was used for flash chromatography. For irradiation, a 390 Kessil LED lamp (model number: PR-160-390) or a 427 Kessil LED lamp (model number: PR-160-427) was placed 4 cm away from the reaction vials. NMR spectra were recorded on Varian MR400, Bruker AN400, and Bruker AN600 instruments and calibrated using residual undeuterated solvent as an internal reference. Data for  $^1\text{H}$  NMR spectra are reported relative to chloroform or benzene as an internal standard (7.26 ppm and 7.16 ppm respectively) and are reported as follows: chemical shift ( $\delta$  ppm), multiplicity, coupling constant (Hz), and integration. Data for  $^{13}\text{C}$  NMR spectra are reported relative to chloroform or benzene as an internal standard (77.2 ppm and 128.1 ppm respectively) and are reported in terms of chemical shift ( $\delta$  ppm). HRMS electrospray (ESI) data was obtained on a Sciex Triple Quad 6500+ System. UV-Vis absorption spectra were recorded on a Cary 60 UV-Vis spectrometer (Agilent Technologies). All measurements were carried out with a 1.0 cm path length quartz cell. Optical rotations were measured on a JAS DIP-360 digital polarimeter. Chiral HPLC analyses were performed on an Agilent 1200 Series system. Low temperature photochemical-reactions were performed using EasyMax 102 Advanced Thermostat system from Mettler-Toledo AutoChem, Inc. (Product ID: 51161711).

## 2. Synthesis and Characterization of Pyridinium Substrates

### *Preparation of Pyridinium Salts*

Pyridinium salt **10a** was synthesized as described previously.<sup>1</sup>

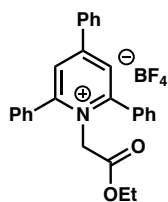

Pyridinium salt **14g** was synthesized as described previously.<sup>2</sup>

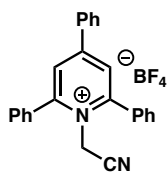

### General Procedure A: Synthesis of Trifluoroethyl Aminoester Pyridinium Salts **12**

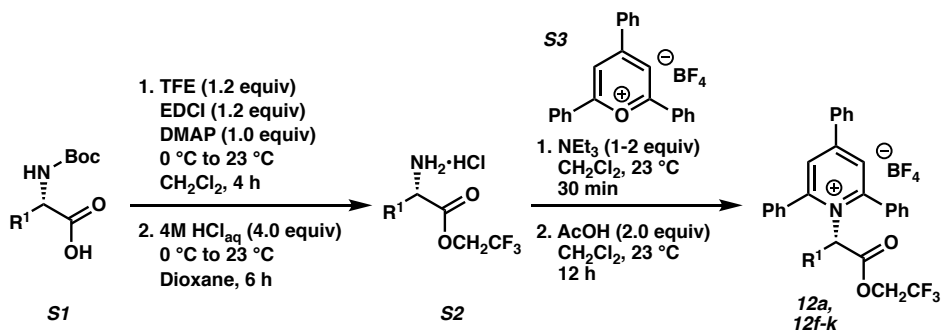

Following the reported method,<sup>3</sup> *N*-Boc-amino acid derivatives **S1** were converted to trifluoroethyl aminoester•HCl salts **S2**. Further following the literature reports,<sup>4</sup> these aminoesters (1.0 equiv) were added to a suspension of 2,4,6-triphenylpyrylium tetrafluoroborate **S3** (1.0 equiv), powdered activated 4Å molecular sieves (~500 mg/mmol), and CH<sub>2</sub>Cl<sub>2</sub> (0.5 M) in a round-bottomed flask equipped with a stir bar. The flask was fitted with a septum and a vent needle. The mixture was stirred as Et<sub>3</sub>N (1.0 equiv for free base amines; 2.0 equiv for amine hydrochloride salts) was added by syringe. The vent needle was removed, and the mixture was stirred at 23 °C for 30 min. The vent needle was reinserted before the addition of acetic acid (2.0 equiv). The needle was again removed, and the mixture was stirred at 23 °C for 12 h. The mixture was then filtered through a short pad of celite using CH<sub>2</sub>Cl<sub>2</sub> to rinse the flask and celite pad. The filtrate was washed successively with aqueous HCl (1.0 M, 2 x 30 mL), saturated aqueous NaHCO<sub>3</sub> (2 x 30 mL), and saturated aqueous NaCl (2 x 30 mL). The organic layer was dried over MgSO<sub>4</sub>, filtered, concentrated under reduced pressure, and purified by silica gel chromatography with acetone/CH<sub>2</sub>Cl<sub>2</sub> as the eluent or recrystallization.

## General Procedure B: Synthesis of Aminoketone Pyridinium Salts 14

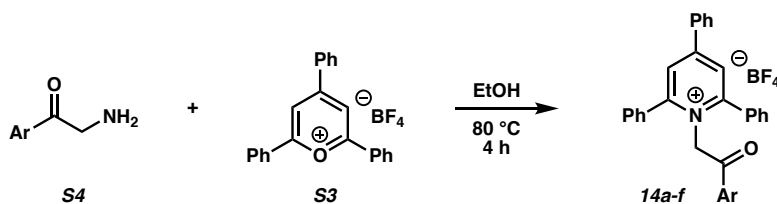

Following the previously described methods<sup>1</sup>, aminoketone **S4** (1.2 equiv) was added to a suspension of 2,4,6-triphenylpyrylium tetrafluoroborate **S3** (1.0 equiv) and EtOH (1.0 M) in a round-bottomed flask. The flask was fitted with a reflux condenser. The mixture was stirred and heated at reflux in an oil bath at 80 °C for 4 h. The mixture was then allowed to cool to 23 °C, concentrated under reduced pressure, and purified by silica gel chromatography with acetone/CH<sub>2</sub>Cl<sub>2</sub> as the eluent or recrystallization.

### 1-(2-oxo-2-(2,2,2-Trifluoroethoxy)ethyl)-2,4,6-triphenylpyridin-1-ium tetrafluoroborate, **12a**:

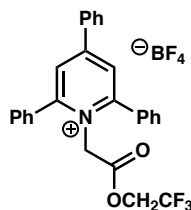

**12a** was synthesized by following the general procedure A at 5.0 mmol scale from N-Boc glycine and purified by silica gel column chromatography (1→10→20% acetone in CH<sub>2</sub>Cl<sub>2</sub>). **12a** was obtained as a white solid (2.0 g, 75%): <sup>1</sup>H NMR (600 MHz, CDCl<sub>3</sub>) δ 7.98 (s, 2H), 7.94 – 7.78 (m, 3H), 7.79 – 7.31 (m, 12H), 5.21 (s, 2H), 4.36 (q, *J* = 8.1 Hz, 2H). <sup>13</sup>C NMR (151 MHz, CDCl<sub>3</sub>) δ 166.00, 157.48, 157.41, 133.69, 132.79, 131.82, 131.69, 129.97, 129.63, 128.87, 128.36, 126.28, 121.99 (q, *J* = 277.7 Hz), 61.42 (d, *J* = 37.6 Hz), 55.82. <sup>19</sup>F NMR (565 MHz, CDCl<sub>3</sub>) δ -73.68, -153.15. HRMS (ESI) calculated for [C<sub>27</sub>H<sub>21</sub>F<sub>3</sub>NO<sub>2</sub>, M – BF<sub>4</sub>]<sup>+</sup>: 448.1519, Found 448.1582.



**(S)-1-(1-oxo-1-(2,2,2-Trifluoroethoxy)propan-2-yl)-2,4,6-triphenylpyridin-1-ium tetrafluoroborate, (S)-12f:**

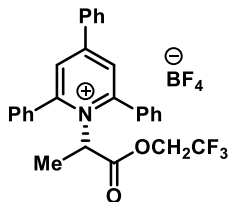

**(S)-12f** was synthesized by following the general procedure A at 5.0 mmol scale from (*S*)-*N*-Boc alanine and purified by silica gel column chromatography (1→10→20% acetone in CH<sub>2</sub>Cl<sub>2</sub>). **(S)-12f** was obtained as a white solid (2.2 g, 80%): <sup>1</sup>H NMR (600 MHz, CDCl<sub>3</sub>) δ 7.95 (s, 2H), 7.87 – 7.81 (m, 2H), 7.73 (brs, 3H), 7.65 – 7.45 (m, 10H), 5.68 (q, *J* = 7.2 Hz, 1H), 4.54 – 4.46 (m, 1H), 4.45 – 4.34 (m, 1H), 1.52 (d, *J* = 7.2 Hz, 3H). <sup>13</sup>C NMR (151 MHz, CDCl<sub>3</sub>) δ 168.0, 157.4, 134.0, 132.7, 132.5, 131.7, 129.8, 129.4, 128.6, 62.1 (d, *J* = 32.9 Hz), 17.1. <sup>19</sup>F NMR (565 MHz, C<sub>6</sub>D<sub>6</sub>) δ -73.4, -153.1. HRMS (ESI) calculated for [C<sub>28</sub>H<sub>24</sub>F<sub>3</sub>NO<sub>2</sub>, M + H-BF<sub>4</sub>]<sup>+</sup>: 463.1754, Found 463.1807.

**(R)-1-(1-oxo-1-(2,2,2-Trifluoroethoxy)propan-2-yl)-2,4,6-triphenylpyridin-1-ium tetrafluoroborate, (R)-12f:**

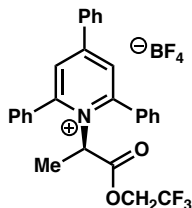

**(R)-12f** was synthesized by following the general procedure A at 5.0 mmol scale from (*R*)-*N*-Boc alanine and purified by silica gel column chromatography (1→10→20% acetone in CH<sub>2</sub>Cl<sub>2</sub>). **(R)-12f** was obtained as a white solid (2.3 g, 84%): <sup>1</sup>H NMR (600 MHz, CDCl<sub>3</sub>) δ 7.95 (s, 2H), 7.83 (dd, *J* = 7.3, 1.8 Hz, 2H), 7.77 (brs, 3H), 7.64 – 7.47 (m, 10H), 5.68 (d, *J* = 7.2 Hz, 1H), 4.50 (dq, *J* = 12.6, 8.1 Hz, 1H), 4.40 (dq, *J* = 12.6, 8.1 Hz, 1H), 1.52 (d, *J* = 7.2 Hz, 3H). <sup>13</sup>C NMR (151 MHz, CDCl<sub>3</sub>) 168.0, 157.4, 134.0, 132.7, 132.5, 131.7, 129.8, 129.4, 128.6, 62.1 (d, *J* = 32.9 Hz), 17.1. <sup>19</sup>F NMR (565 MHz, CDCl<sub>3</sub>) δ -73.4, -153.1. HRMS (ESI) calculated for [C<sub>28</sub>H<sub>24</sub>F<sub>3</sub>NO<sub>2</sub>, M + H-BF<sub>4</sub>]<sup>+</sup>: 463.1754, Found 463.1813.

**(S)-1-(3-Methyl-1-oxo-1-(2,2,2-trifluoroethoxy)butan-2-yl)-2,4,6-triphenylpyridin-1-ium tetrafluoroborate, (S)-12g:**

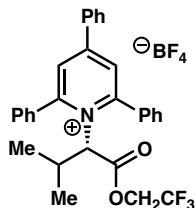

**(S)-12g** was synthesized by following General Procedure B on a 3.05 mmol scale from N-Boc valine and purified by recrystallization (EtOH/Et<sub>2</sub>O). **(S)-12g** was obtained as a white powder (1.07 g, 61%): <sup>1</sup>H NMR (600 MHz, CDCl<sub>3</sub>) δ 8.00 (s, 2H), 7.88 (d, *J* = 7.1 Hz, 2H), 7.74 – 7.53 (m, 11H), 7.50 (t, *J* = 7.5 Hz, 2H), 5.21 (d, *J* = 10.2 Hz, 1H), 4.62 (q, *J* = 8.2 Hz, 2H), 2.14 (dt, *J* = 10.3, 6.5 Hz, 1H), 0.75 (dd, *J* = 8.2, 6.5 Hz, 6H). <sup>13</sup>C NMR (151 MHz, CDCl<sub>3</sub>) δ 165.31, 157.80, 133.48, 133.29, 132.34, 132.11, 130.20, 129.87, 129.79, 129.38, 129.10, 128.29, 122.76 (q, *J* = 277.8 Hz), 73.47, 61.97 (q, *J* = 37.1 Hz), 30.43, 22.32, 19.43. <sup>19</sup>F NMR (565 MHz, CDCl<sub>3</sub>) δ -73.19, -153.03. **HRMS (ESI)** calculated for [C<sub>30</sub>H<sub>27</sub>F<sub>3</sub>NO<sub>2</sub>, MH – BF<sub>4</sub>]<sup>+</sup>: 491.2061, Found 491.2091.

**(S)-1-(1-oxo-3-Phenyl-1-(2,2,2-trifluoroethoxy)propan-2-yl)-2,4,6-triphenylpyridin-1-ium, (S)-12h:**

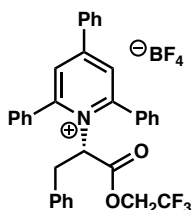

**(S)-12h** was synthesized by following General Procedure B on a 2.54 mmol scale from N-Boc phenylalanine and purified by recrystallization (EtOH/Et<sub>2</sub>O). **(S)-12h** was obtained as a white powder (1.02 g, 64%): <sup>1</sup>H NMR (600 MHz, CDCl<sub>3</sub>) δ 7.95 (s, 2H), 7.89 – 7.71 (m, 2H), 7.83 (d, *J* = 7.6 Hz, 2H), 7.63 – 7.49 (m, 11H), 7.11 – 7.06 (m, 3H), 6.77 (d, *J* = 7.3 Hz, 2H), 5.76 (d, *J* = 4.1 Hz, 1H), 4.52 (d, *J* = 5.3 Hz, 1H), 4.40 – 4.35 (m, 1H), 3.55 (dd, *J* = 14.4, 3.9 Hz, 1H), 2.86 (dd, *J* = 14.5, 8.3 Hz, 1H). <sup>13</sup>C NMR (151 MHz, CDCl<sub>3</sub>) δ 166.54, 157.40, 135.86, 133.69, 132.58, 132.15, 131.78, 129.76, 129.32, 128.97, 128.68, 128.62, 127.40, 122.26 (q, *J* = 277.4 Hz), 70.01, 62.14 (q, *J* = 37.2 Hz), 37.65. <sup>19</sup>F NMR (565 MHz, CDCl<sub>3</sub>) δ -72.93, -152.70. **HRMS (ESI)** calculated for [C<sub>34</sub>H<sub>27</sub>F<sub>3</sub>NO<sub>2</sub>, M – BF<sub>4</sub>]<sup>+</sup>: 538.1988, Found 538.2001.

**(S)-1-(4-(Methylthio)-1-oxo-1-(2,2,2-trifluoroethoxy)butan-2-yl)-2,4,6-triphenylpyridin-1-ium, (S)-12i:**

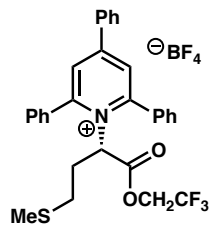

**(S)-12i** was synthesized by following General Procedure B on a 2.76 mmol scale from N-Boc methionine and purified by silica gel column chromatography (1→10→20% acetone in CH<sub>2</sub>Cl<sub>2</sub>) as eluting solvent. **(S)-12i** was obtained as a yellow powder (811.3 mg, 48%): <sup>1</sup>H NMR (600 MHz, CDCl<sub>3</sub>) δ 7.96 (m, 3H), 7.86 – 7.82 (m, 3H), 7.66 – 7.47 (m, 11H), 6.21 (dd, *J* = 9.1, 2.6 Hz, 1H), 4.58 – 4.42 (m, 2H), 2.51 – 2.44 (m, 1H), 2.44 – 2.37 (m, 1H), 2.32 – 2.24 (m, 1H), 1.87 (s, 3H), 1.88 – 1.80 (m, 1H). <sup>13</sup>C NMR (151 MHz, CDCl<sub>3</sub>) δ 167.49, 157.54, 134.14, 133.96, 132.50, 132.36, 132.15, 131.64, 131.35, 129.69, 129.63, 128.61, 122.18 (q, *J* = 277.4 Hz), 66.30, 62.03 (q, *J* = 37.3 Hz), 31.44, 30.54, 14.68. <sup>19</sup>F NMR (565 MHz, CDCl<sub>3</sub>) δ -73.22, -152.73. HRMS (ESI) calculated for [C<sub>30</sub>H<sub>27</sub>F<sub>3</sub>NO<sub>2</sub>S, M – BF<sub>4</sub>]<sup>+</sup>: 522.1709, Found 522.1705.

**(S)-1-(3-(4-Hydroxyphenyl)-1-oxo-1-(2,2,2-trifluoroethoxy)propan-2-yl)-2,4,6-triphenylpyridin-1-ium tetrafluoroborate, (S)-12j:**

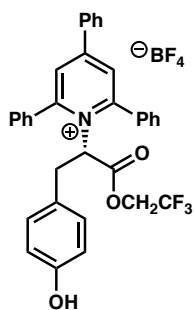

**(S)-12j** was synthesized by following the general procedure A at 5.0 mmol scale from N-Boc tyrosine and purified by silica gel column chromatography (1→10→40% acetone in CH<sub>2</sub>Cl<sub>2</sub>). **(S)-12j** was obtained as a white solid (2.5 g, 78%): <sup>1</sup>H NMR (600 MHz, CDCl<sub>3</sub>) δ 7.87 (s, 2H), 7.83 – 7.76 (m, 2H), 7.67 (brs, 2H), 7.61 – 7.35 (m, 9H), 7.26 (s, 2H), 6.88 (brs, 1H), 6.63 – 6.48 (m, 2H), 6.47 – 6.33 (m, 2H), 5.67 (t, *J* = 6.7 Hz, 1H), 4.64 – 4.49 (m, 1H), 4.40 (dq, *J* = 12.6, 8.2 Hz, 1H), 3.15 (dd, *J* = 14.8, 6.8 Hz, 1H), 2.84 (dd, *J* = 14.8, 6.6 Hz, 1H). <sup>13</sup>C NMR (151 MHz, CDCl<sub>3</sub>) δ 166.24, 157.20, 156.32, 133.27, 132.94, 132.05, 131.88, 129.95, 129.84, 129.43, 128.65, 125.52,

122.42 (q,  $J = 277.3$  Hz), 116.13, , 70.39, 62.16 (q,  $J = 37.2$  Hz), 36.61.  $^{19}\text{F}$  NMR (565 MHz,  $\text{CDCl}_3$ )  $\delta$  -72.92, -151.32. HRMS (ESI) calculated for  $[\text{C}_{34}\text{H}_{27}\text{F}_3\text{NO}_3, \text{M} + \text{H-BF}_4]^+$ : 555.2016, Found 555.2162.

**1-(3-(3-Hydroxyphenyl)-1-oxo-1-(2,2,2-trifluoroethoxy)propan-2-yl)-2,4,6-triphenylpyridin-1-ium, 12k:**

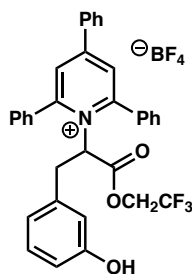

**12k** was synthesized by following General Procedure B on a 2.67 mmol scale from (dl)-N-Boc meta-tyrosine and purified by silica gel column chromatography (1→10→40% acetone in  $\text{CH}_2\text{Cl}_2$ ) as eluting solvent. **12k** was obtained as a white powder (891.4 mg, 52%):  $^1\text{H}$  NMR (400 MHz,  $\text{CDCl}_3$ )  $\delta$  7.96 (s, 2H), 7.89 (d,  $J = 6.8$  Hz, 2H), 7.71 – 7.31 (m, 10H), 6.95 (dd,  $J = 8.9, 6.9$  Hz, 3H), 6.78 – 6.68 (m, 1H), 6.42 (s, 1H), 6.18 (d,  $J = 7.6$  Hz, 1H), 5.71 (d,  $J = 4.3$  Hz, 1H), 4.62 – 4.37 (m, 2H), 3.27 – 3.14 (m, 1H), 2.99 (dd,  $J = 14.8, 4.7$  Hz, 1H).  $^{13}\text{C}$  NMR (151 MHz,  $\text{CDCl}_3$ )  $\delta$  165.99, 157.38, 135.28, 133.22, 132.97, 132.00, 131.75, 130.33, 129.91, 128.76, 122.41 (q,  $J = 277.4$  Hz), 120.25, 115.51, 115.27, 70.07, 62.27 (q,  $J = 37.2$  Hz), 36.81.  $^{19}\text{F}$  NMR (565 MHz,  $\text{CDCl}_3$ )  $\delta$  -72.98, -150.71. HRMS (ESI) calculated for  $[\text{C}_{34}\text{H}_{27}\text{F}_3\text{NO}_3, \text{M} - \text{BF}_4]^+$ : 554.1938, Found 554.1944.

**1-(2-oxo-2-Phenylethyl)-2,4,6-triphenylpyridin-1-ium tetrafluoroborate, 14a:**

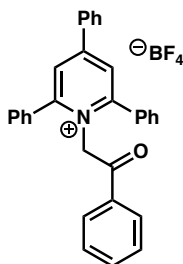

**14a** was synthesized by following the general procedure B at 5.0 mmol scale from  $\alpha$ -amino acetophenone and purified by silica gel column chromatography (1→10% acetone in  $\text{CH}_2\text{Cl}_2$ ). **14a** was obtained as a white solid (1.8 g, 70%):  $^1\text{H}$  NMR (600 MHz, DMSO)  $\delta$  8.64 (s, 2H), 8.41 –

8.33 (m, 2H), 7.80 – 7.54 (m, 15H), 7.44 (dd,  $J = 8.5, 7.2$  Hz, 2H), 6.01 (s, 2H).  $^{13}\text{C}$  NMR (151 MHz, DMSO)  $\delta$  191.55, 156.62, 155.42, 135.12, 133.12, 132.73, 132.33, 131.12, 129.64, 129.54, 129.13, 129.01, 128.99, 128.97, 128.07, 127.95, 125.84, 61.12.  $^{19}\text{F}$  NMR (565 MHz, DMSO)  $\delta$  -148.2. HRMS (ESI) calculated for  $[\text{C}_{31}\text{H}_{25}\text{NO}, \text{M} + \text{H-BF}_4]^+$ : 427.1931, Found 427.1940.

**1-(2-oxo-2-(*p*-Tolyl)ethyl)-2,4,6-triphenylpyridin-1-ium tetrafluoroborate, 14b:**

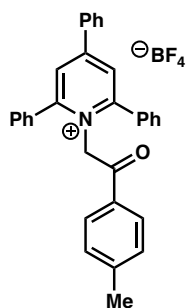

**14b** was synthesized by following the general procedure B at 2.5 mmol scale from  $\alpha$ -amino 4-methylacetophenone and purified by silica gel column chromatography (1 $\rightarrow$ 10% acetone in  $\text{CH}_2\text{Cl}_2$ ). **14b** was obtained as a white solid (0.8 g, 60%):.  $^1\text{H}$  NMR (400 MHz, DMSO)  $\delta$  8.60 (s, 2H), 8.37 – 8.27 (m, 2H), 7.77 – 7.42 (m, 15H), 7.21 (d,  $J = 8.0$  Hz, 2H), 5.92 (s, 2H), 2.30 (s, 3H).  $^{13}\text{C}$  NMR (151 MHz, DMSO)  $\delta$  191.29, 157.04, 155.83, 146.38, 133.57, 132.78, 131.55, 130.65, 130.09, 129.94, 129.55, 129.43, 128.46, 126.27, 61.52, 40.39, 40.25, 40.11, 21.72.  $^{19}\text{F}$  NMR (565 MHz, DMSO)  $\delta$  -148.2. HRMS (ESI) calculated for  $[\text{C}_{32}\text{H}_{27}\text{NO}, \text{M} + \text{H-BF}_4]^+$ : 441.2087, Found 441.2000.

**1-(2-(4-Bromophenyl)-2-oxoethyl)-2,4,6-triphenylpyridin-1-ium, 14c:**

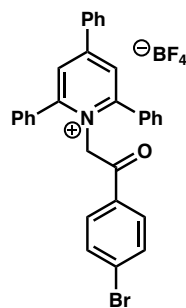

**14c** was synthesized by following General Procedure A on a 2.69 mmol scale from  $\alpha$ -amino 4-bromoacetophenone and purified by silica gel column chromatography (1 $\rightarrow$ 10% acetone in  $\text{CH}_2\text{Cl}_2$ ) as eluting solvent followed by trituration with  $\text{Et}_2\text{O}$ . **14c** was obtained as a white powder

(594.9 mg, 46%):  $^1\text{H NMR}$  (600 MHz,  $\text{CDCl}_3$ )  $\delta$  8.00 (s, 2H), 7.84 (d,  $J = 7.0$  Hz, 2H), 7.65 – 7.55 (m, 4H), 7.60 – 7.18 (m, 13H), 5.91 (s, 2H).  $^{13}\text{C NMR}$  (151 MHz,  $\text{CDCl}_3$ )  $\delta$  191.09, 157.52, 156.60, 133.73, 132.61, 132.43, 132.04, 131.39, 131.36, 130.61, 129.93, 129.44, 128.16, 125.91, 61.69.  $^{19}\text{F NMR}$  (565 MHz,  $\text{CDCl}_3$ )  $\delta$  -152.76. **HRMS (ESI)** calculated for  $[\text{C}_{31}\text{H}_{23}\text{BrNO}, \text{M} - \text{BF}_4]^+$ : 504.0958, Found 504.0951.

**1-(2-(4-Chlorophenyl)-2-oxoethyl)-2,4,6-triphenylpyridin-1-ium tetrafluoroborate, 14d:**

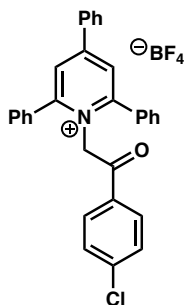

**14d** was synthesized by following the general procedure B at 2.5 mmol scale from  $\alpha$ -amino 4-chloroacetophenone and purified by silica gel column chromatography (1 $\rightarrow$ 10% acetone in  $\text{CH}_2\text{Cl}_2$ ). **14d** was obtained as a white solid (1.0 g, 73%):  $^1\text{H NMR}$  (600 MHz,  $\text{CDCl}_3$ )  $\delta$  8.03 (s, 3H), 7.91 – 7.83 (m, 2H), 7.70 – 7.56 (m, 6H), 7.56 – 7.29 (m, 8H), 5.94 (s, 2H).  $^{13}\text{C NMR}$  (101 MHz, DMSO)  $\delta$  190.76, 156.61, 155.44, 139.84, 132.25, 131.48, 131.07, 129.83, 129.59, 129.16, 129.07, 128.93, 125.79, 60.95.  $^{19}\text{F NMR}$  (565 MHz, DMSO)  $\delta$  -148.24. **HRMS (ESI)** calculated for  $[\text{C}_{31}\text{H}_{24}\text{ClNO}, \text{M} + \text{H} - \text{BF}_4]^+$ : 461.1541, Found 461.1528.

**1-(2-(4-Fluorophenyl)-2-oxoethyl)-2,4,6-triphenylpyridin-1-ium tetrafluoroborate, 14e:**

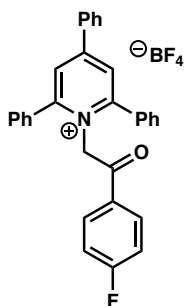

**14e** was synthesized by following the general procedure B at 2.5 mmol scale from  $\alpha$ -amino 4-fluoroacetophenone and purified by silica gel column chromatography (1 $\rightarrow$ 20% acetone in  $\text{CH}_2\text{Cl}_2$ ). **14e** was obtained as a white solid (0.7 g, 53%):  $^1\text{H NMR}$  (400 MHz, DMSO)  $\delta$  8.61 (s,

2H), 8.36 – 8.31 (m, 2H), 7.83 – 7.41 (m, 17H), 5.99 (s, 2H).  $^{13}\text{C}$  NMR (101 MHz, DMSO)  $\delta$  190.80, 156.63, 155.45, 139.86, 133.09, 132.67, 132.28, 131.50, 131.10, 129.87, 129.62, 129.20, 129.10, 128.96, 125.81, 60.97.  $^{19}\text{F}$  NMR (565 MHz, DMSO)  $\delta$  -102.57, -148.27. HRMS (ESI) calculated for  $[\text{C}_{31}\text{H}_{24}\text{FNO}, \text{M} + \text{H-BF}_4]^+$ : 444.1836, Found 444.1825.

**1-(2-(2-Fluorophenyl)-2-oxoethyl)-2,4,6-triphenylpyridin-1-ium, 14f:**

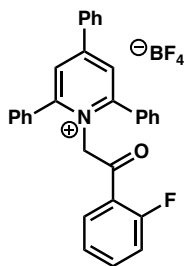

**14f** was synthesized by following General Procedure A on a 2.00 mmol scale from  $\alpha$ -amino 2-fluoroacetophenone and purified by silica gel column chromatography (1 $\rightarrow$ 20% acetone in  $\text{CH}_2\text{Cl}_2$ ) followed by trituration with  $\text{Et}_2\text{O}$ . **14f** was obtained as a white powder (478.8 mg, 44%):  $^1\text{H}$  NMR (400 MHz,  $\text{CDCl}_3$ )  $\delta$  7.99 (s, 2H), 7.87 – 7.79 (m, 2H), 7.76 – 7.20 (m, 15H), 7.15 (td,  $J = 7.6, 1.0$  Hz, 1H), 6.97 (dd,  $J = 11.1, 8.4$  Hz, 1H), 5.75 (s, 2H).  $^{13}\text{C}$  NMR (151 MHz,  $\text{CDCl}_3$ )  $\delta$  189.73, 162.73, 160.17, 156.92, 156.55, 136.55, 136.45, 133.73, 132.15, 132.06, 131.03, 129.95, 129.57, 128.00, 125.86, 124.67, 116.85, 116.63, 64.02.  $^{19}\text{F}$  NMR (565 MHz,  $\text{CDCl}_3$ )  $\delta$  -108.09, -153.26. HRMS (ESI) calculated for  $[\text{C}_{31}\text{H}_{23}\text{FNO}, \text{M} - \text{BF}_4]^+$ : 444.1758, Found 444.1784.

### 3. Optimization Studies

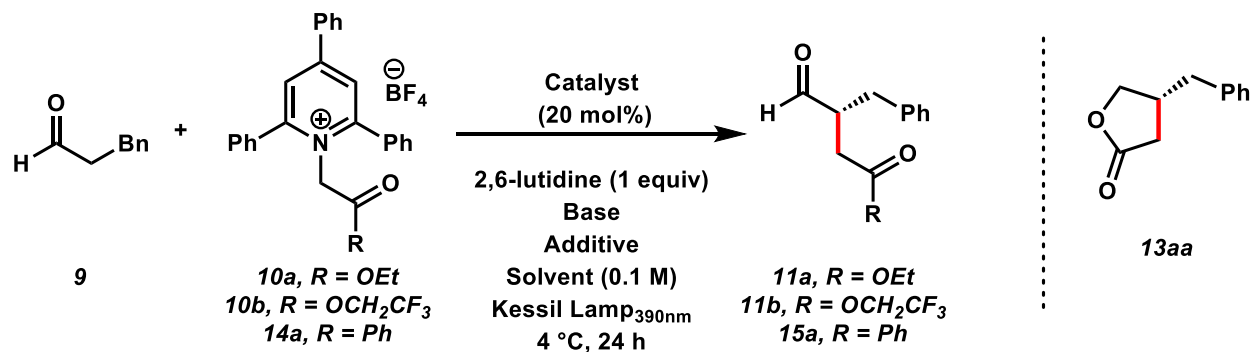

| Entry           | Pyridinium Salt | Catalyst | Solvent                         | Base         | Additive              | Yield <sup>b</sup> (%) | ee <sup>c</sup> (%) |
|-----------------|-----------------|----------|---------------------------------|--------------|-----------------------|------------------------|---------------------|
| 1               | 10a             | A        | CH <sub>2</sub> Cl <sub>2</sub> | 2,6-lutidine | –                     | 5                      | 58                  |
| 2               | 10b             | A        | CH <sub>2</sub> Cl <sub>2</sub> | 2,6-lutidine | –                     | 36                     | 60                  |
| 3               | 10b             | A        | DMA                             | 2,6-lutidine | –                     | 40                     | 92                  |
| 4               | 10b             | B        | DMA                             | 2,6-lutidine | –                     | 22                     | 5                   |
| 5               | 10b             | C        | DMA                             | 2,6-lutidine | –                     | 55                     | 15                  |
| 6               | 10b             | D        | DMA                             | 2,6-lutidine | –                     | 52                     | 23                  |
| 7               | 10b             | A        | DMA                             | 2,6-lutidine | Nal                   | 65                     | 92                  |
| 8               | 10b             | A        | DMA                             | 2,6-lutidine | Nal, H <sub>2</sub> O | 75                     | 92                  |
| 9 <sup>d</sup>  | 10b             | A        | DMA                             | 2,6-lutidine | Nal, H <sub>2</sub> O | 80                     | 46                  |
| 10 <sup>e</sup> | 10b             | A        | DMA                             | 2,6-lutidine | Nal, H <sub>2</sub> O | 58                     | 91                  |
| 11 <sup>f</sup> | 10b             | A        | DMA                             | 2,6-lutidine | Nal, H <sub>2</sub> O | 50                     | 91                  |
| 12 <sup>g</sup> | 10b             | A        | DMA                             | 2,6-lutidine | Nal, H <sub>2</sub> O | 62                     | 92                  |
| 13 <sup>h</sup> | 10b             | A        | DMA                             | 2,6-lutidine | Nal, H <sub>2</sub> O | 18                     | 92                  |
| 14 <sup>j</sup> | 10b             | A        | DMA                             | 2,6-lutidine | Nal, H <sub>2</sub> O | < 5                    | –                   |
| 15 <sup>k</sup> | 10b             | A        | DMA                             | 2,6-lutidine | Nal, H <sub>2</sub> O | < 5                    | –                   |



|                   |     |   |                                 |                                 |   |    |    |
|-------------------|-----|---|---------------------------------|---------------------------------|---|----|----|
| 16 <sup>d,i</sup> | 14a | D | MTBE                            | 2,6-lutidine                    | – | 40 | 56 |
| 17 <sup>d,i</sup> | 14a | D | Et <sub>2</sub> O               | 2,6-lutidine                    | – | 49 | 60 |
| 18 <sup>d,i</sup> | 14a | D | DMSO                            | 2,6-lutidine                    | – | 30 | 57 |
| 19 <sup>d,i</sup> | 14a | D | PhCF <sub>3</sub>               | 2,6-lutidine                    | – | 60 | 74 |
| 20 <sup>d,i</sup> | 14a | D | MeCN                            | 2,6-lutidine                    | – | 35 | 66 |
| 21 <sup>d,i</sup> | 14a | D | THF                             | 2,6-lutidine                    | – | 22 | 48 |
| 22 <sup>d,i</sup> | 14a | D | 1,4-dioxane                     | 2,6-lutidine                    | – | 75 | 67 |
| 23 <sup>d,i</sup> | 14a | D | 1,2-DCE                         | 2,6-lutidine                    | – | 83 | 55 |
| 24 <sup>d,i</sup> | 14a | D | DME                             | 2,6-lutidine                    | – | 50 | 62 |
| 25 <sup>d,i</sup> | 14a | D | benzene                         | 2,6-lutidine                    | – | 20 | 4  |
| 26 <sup>d,i</sup> | 14a | D | CDCl <sub>3</sub>               | 2,6-lutidine                    | – | 60 | 74 |
| 27 <sup>d,i</sup> | 14a | D | TFE                             | 2,6-lutidine                    | – | –  | –  |
| 28 <sup>d,i</sup> | 14a | D | Hexane                          | 2,6-lutidine                    | – | –  | –  |
| 29 <sup>d,i</sup> | 14a | D | EtOAc                           | 2,6-lutidine                    | – | –  | –  |
| 30 <sup>d,i</sup> | 14a | D | MeOH                            | 2,6-lutidine                    | – | –  | –  |
| 31 <sup>d,i</sup> | 14a | D | toluene                         | 2,6-lutidine                    | – | 65 | 70 |
| 32 <sup>d,i</sup> | 14a | D | CH <sub>2</sub> Cl <sub>2</sub> | Na <sub>2</sub> CO <sub>3</sub> | – | 80 | 82 |
| 33 <sup>d,i</sup> | 14a | D | CH <sub>2</sub> Cl <sub>2</sub> | LiOAc                           | – | 75 | 80 |
| 34 <sup>d,i</sup> | 14a | D | DMSO                            | iPr <sub>2</sub> NEt            | – | 5  | 10 |
| 35 <sup>d,i</sup> | 14a | D | Anisole                         | iPr <sub>2</sub> NEt            | – | 18 | 92 |
| 36 <sup>d,i</sup> | 14a | D | CH <sub>2</sub> Cl <sub>2</sub> | DABCO                           | – | 30 | 80 |
| 37 <sup>d,i</sup> | 14a | D | CH <sub>2</sub> Cl <sub>2</sub> | Imidazole                       | – | 30 | 76 |
| 38 <sup>d,i</sup> | 14a | A | DMSO                            | iPr <sub>2</sub> NEt            | – | 68 | 35 |
| 39 <sup>d,i</sup> | 14a | B | DMSO                            | iPr <sub>2</sub> NEt            | – | 70 | 47 |
| 40 <sup>d,i</sup> | 14a | C | DMSO                            | iPr <sub>2</sub> NEt            | – | 60 | 42 |
| 41 <sup>d,i</sup> | 14a | A | CH <sub>2</sub> Cl <sub>2</sub> | 2,6-lutidine                    | – | 45 | 92 |
| 42 <sup>d,h</sup> | 14a | A | CH <sub>2</sub> Cl <sub>2</sub> | 2,6-lutidine                    | – | 70 | 92 |

<sup>a</sup>Reaction conditions: **9** (3 equiv, 0.30 mmol), **10** (1 equiv, 0.1 mmol), catalyst (20 mol%, 0.02 mmol), base (1 equiv, 0.1 mmol) NaI (1 equiv, 0.1 mmol), H<sub>2</sub>O (1.0 mmol), 4 °C, 24 h. <sup>b</sup>Isolated yield. <sup>c</sup>Enantiomeric excess determined by chiral HPLC analysis of lactone derivative **13aa**. <sup>d</sup>Reaction conducted at 23 °C. <sup>e</sup>50 mol% (0.05 mmol) NaI. <sup>f</sup>No 2,6-lutidine. <sup>g</sup>Irradiation with 370 nm Kessil Lamp. <sup>h</sup>Irradiation with 427 nm Kessil Lamp. <sup>i</sup>Irradiation with 467 nm Kessil Lamp. <sup>j</sup>Irradiation with 525 nm Kessil Lamp. <sup>k</sup>No light.

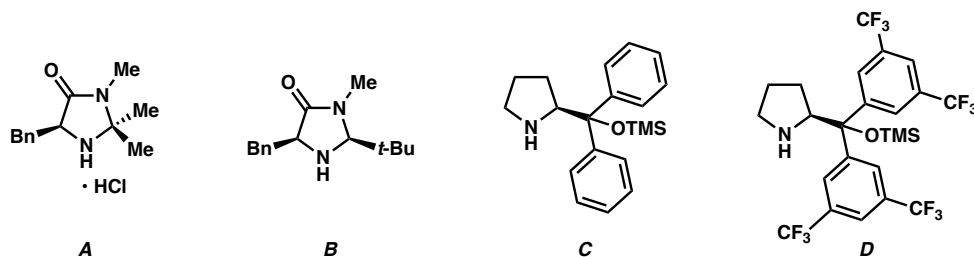

#### 4. General Procedures for Catalytic Photochemical Enantioselective $\alpha$ -Alkylation with Pyridinium Salts

##### *General Procedure C: Enantioselective $\alpha$ -Alkylation with Amino Acid Derived Pyridinium Salts*

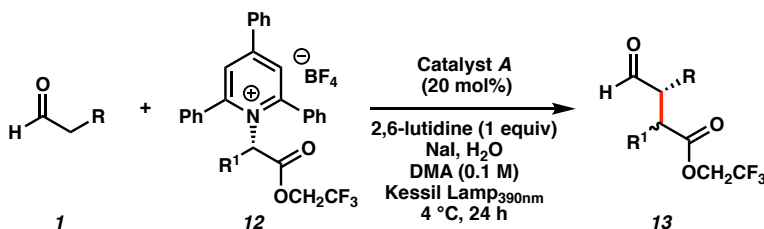

In a flame dried vial under argon, the MacMillan catalyst **A** (5 mg, 20 mol%, 0.02 mmol), pyridinium salt **12** (1.0 equiv, 0.1 mmol), and NaI (15 mg, 1 equiv, 0.1 mmol) were dissolved in 1.0 mL DMA. Aldehyde **1** (3 equiv, 0.3 mmol), 2,6-lutidine (12  $\mu$ L, 1 equiv, 0.1 mmol), and H<sub>2</sub>O (18  $\mu$ L, 10 equiv, 1.0 mmol) were then added. The reaction mixture was carefully degassed via freeze-pump-thaw (three times), and the vial was refilled with argon. The reaction was stirred and irradiated at 4 °C with a 390 nm Kessil Lamp positioned approximately at 4 cm distance from the reaction vessel using the EasyMax 102 Advanced Thermostat system (Figure S1). After 24 h of irradiation, saturated aqueous NaCl (2 mL) was added, and the mixture was extracted with EtOAc (4 x 5 mL). The combined organic layers were dried over Na<sub>2</sub>SO<sub>4</sub>, filtered, and concentrated under

reduced pressure. The crude mixture was purified by column flash chromatography on silica gel using hexanes/EtOAc as an eluent to afford the desired product **13**.

**General Procedure D: Enantioselective  $\alpha$ -Alkylation with Aminoketone Derived Pyridinium Salts**

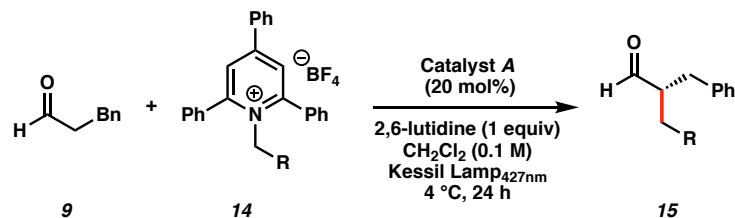

In a flame dried vial under argon, the Macmillan catalyst **A** (5 mg, 20 mol%, 0.02 mmol) and pyridinium salt **14** (1.0 equiv, 0.1 mmol) were dissolved in 1.0 mL  $\text{CH}_2\text{Cl}_2$ . Aldehyde **9** (3 equiv, 0.3 mmol) and 2,6-lutidine (12  $\mu\text{L}$ , 1 equiv, 0.1 mmol) were then added. The reaction mixture was carefully degassed via freeze-pump-thaw (three times), and the vial was refilled with argon. The reaction was stirred and irradiated at 4 °C with a 427 nm Kessil Lamp positioned approximately at 4 cm distance from the reaction vessel using the EasyMax 102 Advanced Thermostat system (Figure S1). After 24 h of irradiation, saturated aqueous NaCl (2 mL) was added, and the mixture was extracted with  $\text{CH}_2\text{Cl}_2$  (4 x 5 mL). The combined organic layers were dried over  $\text{Na}_2\text{SO}_4$ , filtered, and concentrated under reduced pressure. The crude mixture was purified by column flash chromatography on silica gel using hexanes/EtOAc as an eluent to afford the desired products **15**.

**General Procedure E: Synthesis of Lactones**

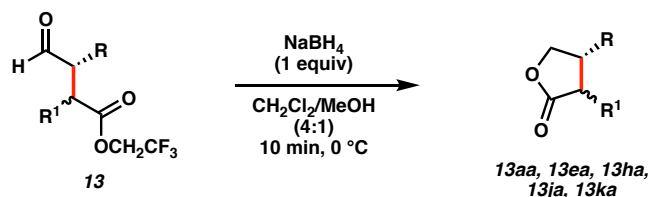

To assess the enantiopurity of the products **13** derived from amino acids, a duplicate experiment of the enantioselective  $\alpha$ -alkylation (general procedure C) was performed. Upon completion of the reaction, the crude mixture was concentrated under reduced pressure, redissolved in  $\text{CH}_2\text{Cl}_2/\text{MeOH}$  (4/1 ratio, 1 mL) under argon, and cooled to 0 °C.  $\text{NaBH}_4$  (1.0 equiv, 0.1 mmol) was added. After 10 minutes of stirring, the mixture was concentrated under reduced pressure. The reaction mixture was diluted with EtOAc (10 mL) and washed with saturated aqueous NaCl (10

mL). The organic layer was dried over Na<sub>2</sub>SO<sub>4</sub>, filtered, and concentrated under reduced pressure. The crude product was purified by column chromatography on silica gel using hexanes/EtOAc as an eluent to afford the desired lactone.

### General Procedure F: Synthesis of Diesters

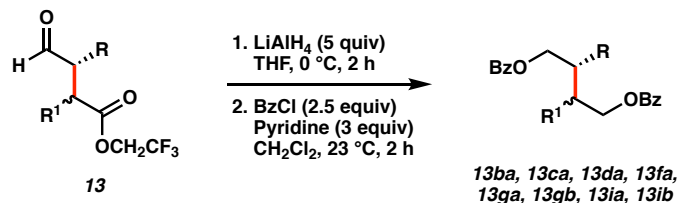

To assess the enantiopurity of the products **13** derived from amino acids, a duplicate experiment of the enantioselective  $\alpha$ -alkylation (general procedure C) was performed. Upon completion of the reaction, the crude mixture was concentrated under reduced pressure, redissolved in THF (1 mL) under argon, and cooled to 0 °C. LiAlH<sub>4</sub> (5.0 equiv, 0.5 mmol) was added. The reaction mixture was stirred at 0 °C for 2 h and then quenched according to the Fieser workup method by the sequential addition of 10  $\mu$ L H<sub>2</sub>O, 10  $\mu$ L 15% aqueous NaOH, and 30  $\mu$ L H<sub>2</sub>O. The reaction was dried over MgSO<sub>4</sub>, passed through a short pad of celite and concentrated under reduced pressure. The crude diol was dissolved in CH<sub>2</sub>Cl<sub>2</sub> (1.0 mL) and treated with pyridine (3.0 equiv, 0.3 mmol) and benzoyl chloride (2.5 equiv, 0.25 mmol). After 2 h of stirring at 23 °C, the reaction mixture was concentrated under reduced pressure and purified by preparative TLC using hexanes/EtOAc as the eluent to afford the desired diester.

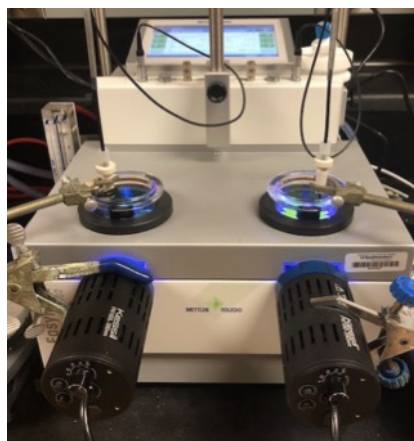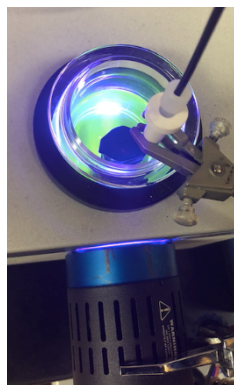

## Figure S1. Reaction Setup

The EasyMax 102 Advanced Thermostat system from Mettler-Toledo AutoChem, Inc. (Product ID: 51161711) was used for the first time to perform low temperature photochemical reactions. We chose the EasyMax 102 for reaction setup because of the ease of maintaining low reaction temperatures for long periods of time, while also shining light on the reaction mixture through the clear window display. All photochemical reactions were carried out using Kessil lamps PR160L (<https://www.kessil.com/science/PR160L.php>) with wavelength of peak intensity of 390 nm or 427 nm. The lamp intensity was set to 100% and positioned at a distance of 4 cm from the reaction vessel, unless otherwise stated.

## 5. Characterization Data for Products

### 2,2,2-Trifluoroethyl (*R*)-3-benzyl-4-oxobutanoate, **13a**:

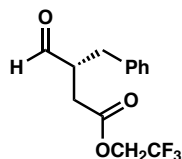

**13a** was synthesized by following the general procedure C at 0.1 mmol scale from **12a** and purified by silica gel column chromatography using hexanes/EtOAc (9.5:0.5) as eluting solvent. **13a** was obtained as a colorless oil (21 mg, 75%):  $[\alpha]_D^{25} = 3.33$  ( $c = 0.15$ ,  $\text{CHCl}_3$ ).  $^1\text{H NMR}$  (600 MHz,  $\text{C}_6\text{D}_6$ )  $\delta$  9.26 (s, 1H), 7.05 (t,  $J = 7.3$  Hz, 2H), 7.03 – 6.97 (m, 1H), 6.84 – 6.76 (m, 2H), 3.95 – 3.85 (m, 1H), 3.88 – 3.79 (m, 1H), 2.69 – 2.62 (m, 1H), 2.55 (dd,  $J = 13.8, 6.2$  Hz, 1H), 2.30 (dd,  $J = 17.1, 8.2$  Hz, 1H), 2.19 (dd,  $J = 13.8, 8.6$  Hz, 1H), 1.93 (dd,  $J = 17.2, 5.0$  Hz, 1H).  $^{13}\text{C NMR}$  (151 MHz,  $\text{C}_6\text{D}_6$ )  $\delta$  200.5, 170.1, 137.8, 128.8, 128.5, 126.6, 123.5 (d,  $J = 277.2$  Hz), 60.2 (q,  $J = 36.0$  Hz) 49.2, 34.2, 31.6.  $^{19}\text{F NMR}$  (565 MHz,  $\text{C}_6\text{D}_6$ )  $\delta$  73.8. **HRMS (ESI)** calculated for  $[\text{C}_{13}\text{H}_{13}\text{F}_3\text{O}_3, \text{M} + \text{Na}]^+$ : 297.0709, Found 297.0712. The enantiomeric excess of product **13a** determined to be 92% after conversion to lactone **13aa**.

### (*R*)-4-Benzylidihydrofuran-2(3*H*)-one, **13aa**:

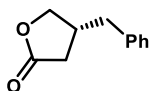

**13aa** was synthesized by following the general procedure E at 0.1 mmol scale from **13a** and

purified by silica gel column chromatography using hexanes/EtOAc (9:1) as eluting solvent. **13aa** was obtained as a colorless oil (10 mg, 57%): 92% ee. HPLC conditions: Chiralpak AD\_H column (25 cm × 0.46 cm ID), hexanes/IPA = 95:05, 0.8 mL/min, 210 nm UV detector, tR = 22.68 min (major) and tR = 24.62 min (minor).  $[\alpha]_D^{25} = 7.98$  (c = 0.05, CHCl<sub>3</sub>). <sup>1</sup>H NMR (400 MHz, CDCl<sub>3</sub>) δ 7.31 – 7.22 (m, 2H), 7.21 – 7.14 (m, 1H), 7.13 – 7.04 (m, 2H), 4.27 (dd, *J* = 9.2, 6.8 Hz, 1H), 3.97 (dd, *J* = 9.2, 6.1 Hz, 1H), 2.86 – 2.65 (m, 3H), 2.54 (dd, *J* = 17.5, 8.0 Hz, 1H), 2.23 (dd, *J* = 17.5, 6.9 Hz, 1H). <sup>13</sup>C NMR (101 MHz, CDCl<sub>3</sub>) δ 177.0, 138.3, 129.0, 128.8, 127.0, 77.5, 77.2, 76.8, 72.8, 39.1, 37.3, 34.4. HRMS (ESI) calculated for [C<sub>11</sub>H<sub>12</sub>O<sub>2</sub>, M + Na]<sup>+</sup>: 199.0730, Found 199.0745.

### 2,2,2-Trifluoroethyl (*R*)-3-formylheptanoate, **13b**:

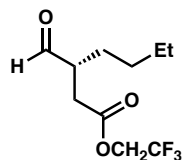

**13b** was synthesized by following the general procedure C at 0.1 mmol scale from **12b** and purified by silica gel column chromatography using hexanes/EtOAc (9.5:0.5) as eluting solvent. **13b** was obtained as a colorless oil (16.5 mg, 69%).  $[\alpha]_D^{25} = +5.38$  (c = 0.29, CHCl<sub>3</sub>). <sup>1</sup>H NMR (600 MHz, C<sub>6</sub>D<sub>6</sub>) δ 9.21 (s, 1H), 4.04 (dq, *J* = 12.8, 8.6 Hz, 1H), 3.83 (dq, *J* = 12.8, 8.6 Hz, 1H), 2.43 – 2.27 (m, 2H), 1.95 – 1.83 (m, 1H), 1.22 – 1.12 (m, 1H), 1.06 – 0.96 (m, 2H), 0.95 – 0.80 (m, 3H), 0.73 (t, *J* = 7.3 Hz, 3H). <sup>13</sup>C NMR (151 MHz, C<sub>6</sub>D<sub>6</sub>) δ 201.1, 170.3, 123.5 (d, *J* = 277.2 Hz), 60.2 (q, *J* = 33.8 Hz), 47.5, 32.0, 28.8, 28.0, 22.9, 13.9. HRMS (ESI) calculated for [C<sub>10</sub>H<sub>15</sub>F<sub>3</sub>O<sub>3</sub>, M + Na]<sup>+</sup>: 263.0866, Found 263.0868. The enantiomeric excess of product **13b** determined to be 91% after conversion to diester **13ba**.

### (*R*)-2-Butylbutane-1,4-diyl dibenzoate, **13ba**:

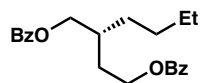

**13ba** was synthesized by following the general procedure F at 0.1 mmol scale from **13b** and purified by preparative TLC using hexanes/EtOAc (9:1) as eluting solvent. **13ba** was obtained as a colorless oil (19 mg, 54%): 91% ee. HPLC conditions: Chiralpak AD\_H column (25 cm × 0.46 cm ID), hexanes/IPA = 95:05, 0.7 mL/min, 230 nm UV detector, tR = 12.53 min (major) and tR =

11.74 min (minor).  $[\alpha]_D^{25} = -27.99$  ( $c = 0.05$ ,  $\text{CHCl}_3$ ).  $^1\text{H NMR}$  (400 MHz,  $\text{CDCl}_3$ )  $\delta$  8.03 (ddd,  $J = 8.4, 4.2, 1.4$  Hz, 4H), 7.60 – 7.50 (m, 2H), 7.43 (td,  $J = 7.6, 5.8$  Hz, 4H), 4.51 – 4.41 (m, 2H), 4.38 (dd,  $J = 11.1, 5.9$  Hz, 1H), 4.29 (dd,  $J = 11.1, 5.9$  Hz, 1H), 2.04 (qd,  $J = 6.4, 5.1$  Hz, 1H), 1.93 (dq,  $J = 10.8, 7.0$  Hz, 2H), 1.50 (ddt,  $J = 8.3, 6.2, 2.5$  Hz, 2H), 1.37 (ddtd,  $J = 19.7, 9.5, 7.5, 5.9$  Hz, 4H), 0.91 (t,  $J = 7.0$  Hz, 3H).  $^{13}\text{C NMR}$  (101 MHz,  $\text{CDCl}_3$ )  $\delta$  166.7, 166.7, 133.1, 133.0, 130.4, 129.7, 128.5, 128.5, 67.5, 63.3, 35.1, 31.2, 30.9, 29.1, 23.0, 14.1. **HRMS (ESI)** calculated for  $[\text{C}_{22}\text{H}_{26}\text{O}_4, \text{M} + \text{Na}]^+$ : 377.1723, Found 377.1713.

### 2,2,2-Trifluoroethyl (*S*)-3-formyl-4-methylpentanoate, **13c**:

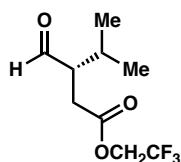

**13c** was synthesized by following the general procedure C at 0.1 mmol scale from **12c** and purified by silica gel column chromatography using hexanes/EtOAc (9.5:0.5) as eluting solvent. **13c** was obtained as a colorless oil (14 mg, 62%).  $[\alpha]_D^{25} = +34.26$  ( $c = 0.17$ ,  $\text{CHCl}_3$ ).  $^1\text{H NMR}$  (600 MHz,  $\text{C}_6\text{D}_6$ )  $\delta$  9.37 (s, 1H), 4.26 – 4.14 (m, 1H), 3.92 (dddd,  $J = 14.7, 8.3, 4.0, 1.9$  Hz, 1H), 2.59 (dd,  $J = 16.7, 9.8$  Hz, 1H), 2.52 (dt,  $J = 9.7, 4.1$  Hz, 1H), 1.93 (ddd,  $J = 16.8, 3.8, 2.0$  Hz, 1H), 1.67 – 1.58 (m, 1H), 0.63 (dd,  $J = 6.9, 1.8$  Hz, 3H), 0.53 (dd,  $J = 7.0, 1.8$  Hz, 3H).  $^{13}\text{C NMR}$  (151 MHz,  $\text{C}_6\text{D}_6$ )  $\delta$  201.5, 170.8, 123.7 (q,  $J = 277.2$  Hz), 60.2 (q,  $J = 36.4$  Hz), 53.4, 53.3, 28.8, 27.3, 19.8, 18.6.  $^{19}\text{F NMR}$  (565 MHz,  $\text{CDCl}_3$ )  $\delta$  -73.80 (t,  $J = 8.5$  Hz). **HRMS (ESI)** calculated for  $[\text{C}_9\text{H}_{13}\text{F}_3\text{O}_3, \text{M} + \text{Na}]^+$ : 249.0709, Found 249.0710. The enantiomeric excess of product **13c** determined to be 95% after conversion to diester **13ca**.

### (*S*)-2-Isopropylbutane-1,4-diyl dibenzoate, **13ca**:

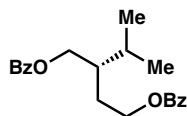

**13ca** was synthesized by following the general procedure F at 0.1 mmol scale from **13c** and purified by preparative TLC using hexanes/EtOAc (9:1) as eluting solvent. **13ca** was obtained as a colorless oil (12 mg, 34%): 95% ee. HPLC conditions: Chiralpak AD\_H column (25 cm  $\times$  0.46 cm ID), hexanes/IPA = 95:05, 0.7 mL/min, 230 nm UV detector,  $t_R = 13.75$  min (major) and  $t_R =$

12.80 min (minor).  $[\alpha]_D^{25} = +13.99$  ( $c = 0.20$ ,  $\text{CHCl}_3$ ).  $^1\text{H NMR}$  (600 MHz,  $\text{CDCl}_3$ )  $\delta$  8.03 (ddd,  $J = 8.4, 3.0, 1.4$  Hz, 4H), 7.55 (dddd,  $J = 8.7, 5.5, 2.8, 1.4$  Hz, 2H), 7.42 (tdd,  $J = 7.4, 4.3, 1.6$  Hz, 4H), 4.50 – 4.39 (m, 3H), 4.32 (dd,  $J = 11.2, 5.8$  Hz, 1H), 2.03 – 1.81 (m, 4H), 1.01 (dd,  $J = 6.8, 4.5$  Hz, 6H).  $^{13}\text{C NMR}$  (151 MHz,  $\text{CDCl}_3$ )  $\delta$  166.8, 166.7, 133.1, 133.0, 130.4, 130.4, 129.7, 128.5, 128.5, 66.1, 63.8, 40.7, 29.1, 28.1, 19.7, 19.7. **HRMS (ESI)** calculated for  $[\text{C}_{21}\text{H}_{24}\text{O}_4, \text{M} + \text{H}]^+$ : 341.1747, Found 341.1789.

**2,2,2-Trifluoroethyl (S)-3-cyclohexyl-4-oxobutanoate, 13d:**

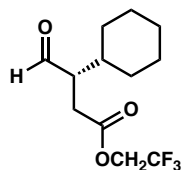

**13d** was synthesized by following the general procedure C at 0.1 mmol scale from **12d** and purified by silica gel column chromatography using hexanes/EtOAc (9.5:0.5) as eluting solvent. **13d** was obtained as a colorless oil (16 mg, 60%).  $[\alpha]_D^{25} = +9.59$  ( $c = 0.25$ ,  $\text{CHCl}_3$ ).  $^1\text{H NMR}$  (600 MHz,  $\text{C}_6\text{D}_6$ )  $\delta$  9.32 (s, 1H), 4.12 (dd,  $J = 12.8, 8.6$  Hz, 1H), 3.81 (dd,  $J = 12.8, 8.6$  Hz, 1H), 2.54 (dd,  $J = 16.9, 9.8$  Hz, 1H), 2.48 – 2.40 (m, 1H), 1.87 (dd,  $J = 16.8, 3.8$  Hz, 1H), 1.53 – 1.40 (m, 3H), 1.23 (dddt,  $J = 13.4, 10.0, 6.5, 3.5$  Hz, 2H), 1.10 (ddd,  $J = 13.2, 4.6, 2.2$  Hz, 1H), 1.05 – 0.78 (m, 3H), 0.60 (dq,  $J = 35.3, 12.2, 3.3$  Hz, 2H).  $^{13}\text{C NMR}$  (151 MHz,  $\text{C}_6\text{D}_6$ )  $\delta$  201.6, 170.8, 124.6 (q,  $J = 275.1$  Hz), 60.3 (q,  $J = 33.8$  Hz), 53.1, 37.5, 30.6, 29.4, 29.4, 26.6, 26.5, 26.1.  $^{19}\text{F NMR}$  (565 MHz,  $\text{C}_6\text{D}_6$ )  $\delta$  73.8. **HRMS (ESI)** calculated for  $[\text{C}_{12}\text{H}_{17}\text{F}_3\text{O}_3, \text{M} + \text{Na}]^+$ : 289.1022, Found 289.1044. The enantiomeric excess of product **13d** determined to be 96% after conversion to diester **13da**.

**(S)-2-Cyclohexylbutane-1,4-diyl dibenzoate, 13da:**

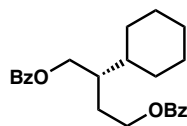

**13da** was synthesized by following the general procedure F at 0.1 mmol scale from **13d** and purified by preparative TLC using hexanes/EtOAc (9.5:0.5) as eluting solvent. **13da** was obtained as a colorless oil (12 mg, 32%): 96% ee. HPLC conditions: Chiralcel OJ\_H column (25 cm  $\times$  0.46 cm ID), hexanes/IPA = 97:03, 0.6 mL/min, 230 nm UV detector.  $t_R = 24.64$  min (major) and  $t_R = 27.51$  min (minor).  $[\alpha]_D^{25} = -24.20$  ( $c = 0.19$ ,  $\text{CHCl}_3$ ).  $^1\text{H NMR}$  (600 MHz,  $\text{CDCl}_3$ )  $\delta$  8.08 – 7.98



(m, 4H), 7.60 – 7.50 (m, 2H), 7.47 – 7.37 (m, 4H), 4.50 – 4.38 (m, 3H), 4.30 (dd,  $J = 11.2, 5.9$  Hz, 1H), 2.07 – 1.95 (m, 1H), 1.94 – 1.85 (m, 2H), 1.77 (tt,  $J = 10.6, 3.4$  Hz, 3H), 1.71 – 1.64 (m, 1H), 1.60 – 1.51 (m, 2H), 1.31 – 1.20 (m, 3H), 1.15 (dddd,  $J = 17.3, 13.6, 8.6, 3.1$  Hz, 3H).  $^{13}\text{C}$  NMR (151 MHz,  $\text{CDCl}_3$ )  $\delta$  166.8, 166.7, 133.1, 133.0, 130.4, 129.7, 129.7, 128.5, 128.5, 66.2, 63.9, 40.3, 39.6, 30.5, 29.9, 28.4, 26.9, 26.8, 26.7. **HRMS (ESI)** calculated for  $[\text{C}_{24}\text{H}_{28}\text{O}_4, \text{M} + \text{Na}]^+$ : 403.1880, Found 403.1908.

**2,2,2-Trifluoroethyl (S)-4-(((benzyloxy)carbonyl)amino)-3-formylbutanoate, 13f:**

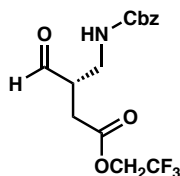

**13f** was synthesized by following the general procedure C at 0.1 mmol scale from **12f** and purified by silica gel column chromatography using hexanes/EtOAc (8.5:1.5) as eluting solvent. **13f** was obtained as a colorless oil (27 mg, 78%).  $[\alpha]_{\text{D}}^{25} = +3.50$  ( $c = 0.40, \text{CHCl}_3$ ).  $^1\text{H}$  NMR (600 MHz,  $\text{CDCl}_3$ )  $\delta$  9.75 (s, 1H), 7.40 – 7.28 (m, 5H), 5.09 (dd,  $J = 10.3, 5.3$  Hz, 3H), 4.47 (q,  $J = 8.4$  Hz, 2H), 3.57 (q,  $J = 6.1, 5.6$  Hz, 2H), 3.06 (q,  $J = 6.1$  Hz, 1H), 2.85 (dd,  $J = 17.3, 6.9$  Hz, 1H), 2.64 (dd,  $J = 17.3, 6.4$  Hz, 1H).  $^{13}\text{C}$  NMR (151 MHz,  $\text{CDCl}_3$ )  $\delta$  200.8, 200.8, 170.2, 156.7, 136.2, 128.7, 128.5, 128.3, 123.8 (q,  $J = 275.1$  Hz), 67.2, 60.9 (q,  $J = 32.8$  Hz), 48.5, 39.4, 30.5.  $^{19}\text{F}$  NMR (565 MHz,  $\text{CDCl}_3$ )  $\delta$  73.7. **HRMS (ESI)** calculated for  $[\text{C}_{15}\text{H}_{16}\text{F}_3\text{NO}_5, \text{M} + \text{Na}]^+$ : 370.0873, Found 370.0854. The enantiomeric excess of product **13f** determined to be 90% after conversion to lactone **13fa**

**Benzyl (S)-((5-oxotetrahydrofuran-3-yl)methyl)carbamate, 13fa:**

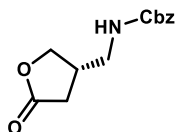

**13fa** was synthesized by following the general procedure E at 0.1 mmol scale from **13f** and purified by silica gel column chromatography using hexanes/EtOAc (9:1) as eluting solvent. **13fa** was obtained as a colorless oil (15 mg, 60%): 90% ee. HPLC conditions: Chiralcel OJ\_H column (25 cm  $\times$  0.46 cm ID), hexanes/IPA = 70:30, 0.8 mL/min, 230 nm UV detector, tR = 38.15 min (major) and tR = 35.58 min (minor).  $[\alpha]_{\text{D}}^{25} = -11.99$  ( $c = 0.15, \text{CHCl}_3$ ).  $^1\text{H}$  NMR (600 MHz,  $\text{CDCl}_3$ )  $\delta$  7.44

– 7.28 (m, 5H), 5.10 (s, 2H), 4.95 (s, 1H), 4.40 (dd,  $J = 9.4, 7.3$  Hz, 1H), 4.09 (dd,  $J = 9.4, 5.6$  Hz, 1H), 3.30 (td,  $J = 6.7, 3.7$  Hz, 2H), 2.89 – 2.78 (m, 1H), 2.63 (dd,  $J = 17.7, 8.7$  Hz, 1H), 2.31 (dd,  $J = 17.7, 6.5$  Hz, 1H).  $^{13}\text{C}$  NMR (151 MHz,  $\text{CDCl}_3$ )  $\delta$  176.2, 156.5, 136.0, 128.6, 128.2, 70.8, 67.1, 42.9, 35.9, 31.9. HRMS (ESI) calculated for  $[\text{C}_{13}\text{H}_{15}\text{NO}_4, \text{M} + \text{Na}]^+$ : 272.0893, Found 272.0871.

**2,2,2-Trifluoroethyl (3*R*)-3-benzyl-2-methyl-4-oxobutanoate, 13g:**

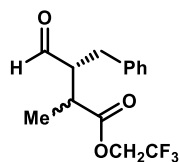

**13g** was synthesized by following the general procedure C at 0.1 mmol scale from **12g** and purified by silica gel column chromatography using hexanes/EtOAc (9.5:0.5) as eluting solvent. **13g** was obtained as a colorless oil (16 mg, 56%): *dr* 2:1,  $[\alpha]_{\text{D}}^{25} = +6.82$  ( $c = 0.16, \text{CHCl}_3$ ).  $^1\text{H}$  NMR (600 MHz,  $\text{CDCl}_3$ )  $\delta$  9.66 (s, 1.2H), 9.63 (d,  $J = 1.1$  Hz, 1H), 7.23 (td,  $J = 7.4, 4.0$  Hz, 5H), 7.19 – 7.14 (m, 2.74 H), 7.14 – 7.07 (m, 4.91H), 4.45 – 4.33 (m, 3.79 H), 4.28 (dq,  $J = 12.6, 8.4$  Hz, 1.41 H), 3.10 – 3.01 (m, 2.57H), 3.01 – 2.93 (m, 2.90H), 2.91 – 2.77 (m, 4.12H), 2.76 – 2.66 (m, 1.35H), 1.21 (dd,  $J = 7.2, 5.1$  Hz, 7.94H).  $^{13}\text{C}$  NMR (151 MHz,  $\text{CDCl}_3$ )  $\delta$  202.23, 202.16, 173.38, 172.97, 137.92, 137.84, 129.16, 129.02, 128.94, 128.88, 126.97, 126.95, 123.93 (q,  $J = 275.1$  Hz), 123.89 (q,  $J = 275.1$  Hz), 60.73 (q,  $J = 32.8$  Hz), 55.21, 54.70, 38.64, 38.04, 32.84, 32.37, 14.23, 13.50.  $^{19}\text{F}$  NMR (565 MHz,  $\text{CDCl}_3$ )  $\delta$  73.74, 73.76. HRMS (ESI) calculated for  $[\text{C}_{14}\text{H}_{15}\text{F}_3\text{O}_3, \text{M} + \text{Na}]^+$ : 311.0866, Found 311.0872. The enantiomeric excess of product **13g** determined to be 99% and 97% for the major and minor diastereomers, respectively, after conversion to diester **13ga**.

**(2*R*)-2-Benzyl-3-methylbutane-1,4-diyl dibenzoate, 13ga:**

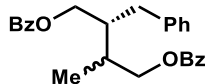

**13ga** was synthesized by following the general procedure F at 0.1 mmol scale from **13g** and purified by preparative TLC using hexanes/EtOAc (9.5:0.5) as eluting solvent. **13ga** was obtained as a colorless oil (20 mg, 50%): *dr* 2:1, 99% ee, 97% ee. HPLC conditions: Chiralcel OJ\_H column (25 cm  $\times$  0.46 cm ID), hexanes/IPA = 70:30, 0.8 mL/min, 230 nm UV detector, *dr*1 tR = 14.76 min (major) and tR = 19.01 min (minor), tR = 16.52 min (major) and tR = 19.94 min (minor).  $[\alpha]_{\text{D}}^{25} =$

-15.64 ( $c = 0.11$ ,  $\text{CHCl}_3$ ).  $^1\text{H NMR}$  (600 MHz,  $\text{CDCl}_3$ )  $\delta$  8.07 – 8.03 (m, 2H), 8.02 – 7.98 (m, 2H), 7.98 – 7.94 (m, 2H), 7.60 – 7.51 (m, 4H), 7.46 – 7.39 (m, 8H), 7.27 (dt,  $J = 4.9, 3.3$  Hz, 6H), 7.23 – 7.16 (m, 6H), 4.42 (ddd,  $J = 11.2, 6.4, 4.9$  Hz, 2H), 4.38 – 4.30 (m, 4H), 4.28 (dd,  $J = 11.3, 4.5$  Hz, 2H), 2.92 (dd,  $J = 13.9, 4.6$  Hz, 2H), 2.88 – 2.80 (m, 2H), 2.67 (dd,  $J = 13.9, 9.4$  Hz, 2H), 2.42 – 2.32 (m, 4H), 1.16 (dd,  $J = 6.9, 5.3$  Hz, 6H).  $^{13}\text{C NMR}$  (151 MHz,  $\text{CDCl}_3$ ) 166.69, 166.65, 166.64, 166.62, 140.12, 140.02, 133.15, 133.12, 130.33, 130.23, 129.70, 129.67, 129.15, 129.14, 128.57, 128.53, 126.40, 68.21, 67.66, 65.07, 64.81, 53.59, 41.96, 41.53, 35.82, 34.23, 33.76, 33.69, 13.91, 13.64. **HRMS (ESI)** calculated for  $[\text{C}_{26}\text{H}_{26}\text{O}_4, \text{M} + \text{Na}]^+$ : 425.1723, Found 425.1721.

### 2,2,2-Trifluoroethyl (3*R*)-3-benzyl-2-isopropyl-4-oxobutanoate, **13h**:

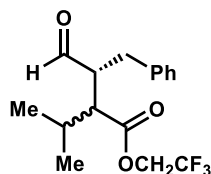

**13h** was synthesized by following the general procedure C at 0.1 mmol scale from **12h** and purified by silica gel column chromatography using hexanes/EtOAc (9.5:0.5) as eluting solvent. **13h** was obtained as a colorless oil (16 mg, 51%): *dr* 1:1.  $[\alpha]_{\text{D}}^{25} = -8.80$  ( $c = 0.13$ ,  $\text{CHCl}_3$ ).  $^1\text{H NMR}$  (600 MHz,  $\text{CDCl}_3$ )  $\delta$  9.83 (d,  $J = 1.3$  Hz, 1H), 4.61 – 4.39 (m, 2H), 3.07 – 2.97 (m, 2H), 2.90 – 2.80 (m, 1H), 2.53 (dd,  $J = 7.7, 6.1$  Hz, 1H), 2.26 – 2.15 (m, 1H), 1.02 (d,  $J = 6.8$  Hz, 3H), 0.92 (d,  $J = 6.7$  Hz, 3H).  $^{13}\text{C NMR}$  (151 MHz,  $\text{CDCl}_3$ )  $\delta$  202.8, 202.8, 172.3, 137.7, 129.1, 128.9, 127.0, 123.9 (q,  $J = 274.1$  Hz), 60.4 (q,  $J = 38.0$  Hz), 52.2, 51.9, 33.5, 28.0, 20.9, 19.6.  $^{19}\text{F NMR}$  (565 MHz,  $\text{CDCl}_3$ )  $\delta$  73.74. **HRMS (ESI)** calculated for  $[\text{C}_{14}\text{H}_{15}\text{F}_3\text{O}_3, \text{M} + \text{Na}]^+$ : 339.1179, Found 339.1187. The enantiomeric excess of product **13h** determined to be 97% and 98% for the major and minor diastereomers, respectively, after conversion to diester **13ha** and **13hb**.

### (2*R*)-2-Benzyl-3-isopropylbutane-1,4-diyl dibenzoate, **13ha** and **13hb**:

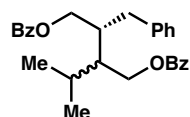

**13ha** and **13hb** were synthesized by following the general procedure F at 0.2 mmol scale from **13h** and purified by silica gel column chromatography using hexanes/EtOAc (10:1) as eluting solvent to yield separable diastereomers.

**13ha** (diastereomer 1) was obtained as a colorless oil (6.2 mg, 8% yield, 97% ee): HPLC conditions: Chiralpak AD-H column (25 cm × 0.46 cm ID), hexanes/IPA = 95:5, 0.8 mL/min, 230 nm UV detector,  $t_R$  = 9.05 min (major) and  $t_R$  = 11.19 min (minor).  $[\alpha]_D^{25}$  = +37.1 ( $c$  = 0.07,  $\text{CHCl}_3$ ).  $^1\text{H NMR}$  (400 MHz,  $\text{CDCl}_3$ )  $\delta$  8.06 – 8.00 (m, 2H), 7.97 – 7.90 (m, 2H), 7.61 – 7.50 (m, 2H), 7.43 (dt,  $J$  = 14.0, 7.7 Hz, 4H), 7.31 – 7.22 (m, 7H), 7.19 (d,  $J$  = 7.3 Hz, 3H), 4.60 – 4.48 (m, 2H), 4.35 – 4.27 (m, 2H), 3.03 (dd,  $J$  = 13.7, 4.0 Hz, 1H), 2.65 (dd,  $J$  = 13.7, 10.7 Hz, 1H), 2.52 (dp,  $J$  = 10.2, 5.0 Hz, 1H), 2.09 (h,  $J$  = 6.7 Hz, 1H), 1.95 (p,  $J$  = 5.2 Hz, 1H), 1.14 (d,  $J$  = 6.8 Hz, 3H), 1.07 (d,  $J$  = 6.7 Hz, 3H).  $^{13}\text{C NMR}$  (151 MHz,  $\text{CDCl}_3$ )  $\delta$  166.73, 166.59, 140.41, 133.15, 133.08, 130.34, 130.27, 129.69, 129.64, 129.10, 128.72, 128.61, 128.52, 126.39, 65.77, 63.86, 44.28, 40.03, 34.77, 27.53, 21.94, 20.19. **HRMS (ESI)** calculated for  $[\text{C}_{28}\text{H}_{30}\text{O}_4, \text{M} + \text{Na}]^+$ : 453.2042, Found 453.2020.

**13hb** (diastereomer 2) was obtained as a colorless oil (4.8 mg, 6% yield, 98% ee): HPLC conditions: Chiralpak IC column (25 cm × 0.46 cm ID), hexanes/IPA = 98:2, 0.5 mL/min, 230 nm UV detector,  $t_R$  = 26.67 min (major) and  $t_R$  = 28.52 min (minor).  $[\alpha]_D^{25}$  = -5.0 ( $c$  = 0.12,  $\text{CHCl}_3$ ).  $^1\text{H NMR}$  (400 MHz,  $\text{CDCl}_3$ )  $\delta$  7.99 (ddd,  $J$  = 24.6, 8.3, 1.3 Hz, 4H), 7.59 – 7.51 (m, 2H), 7.45 – 7.37 (m, 4H), 7.31 – 7.25 (m, 2H), 7.23 – 7.16 (m, 3H), 4.57 – 4.47 (m, 3H), 4.30 (dd,  $J$  = 11.3, 6.6 Hz, 1H), 2.99 (dd,  $J$  = 13.9, 7.6 Hz, 1H), 2.85 (dd,  $J$  = 13.9, 7.4 Hz, 1H), 2.53 (qt,  $J$  = 7.4, 4.5 Hz, 1H), 2.15 – 2.04 (m,  $J$  = 6.9 Hz, 1H), 1.76 – 1.70 (m, 1H), 1.04 (d,  $J$  = 6.8 Hz, 3H), 0.98 (d,  $J$  = 6.7 Hz, 3H).  $^{13}\text{C NMR}$  (151 MHz,  $\text{CDCl}_3$ )  $\delta$  166.62, 166.54, 140.02, 133.00, 132.96, 130.18, 130.15, 129.54, 129.53, 129.09, 128.57, 128.46, 128.40, 126.23, 65.38, 63.37, 44.52, 40.07, 37.00, 27.56, 21.59, 20.22. **HRMS (ESI)** calculated for  $[\text{C}_{28}\text{H}_{30}\text{O}_4, \text{M} + \text{Na}]^+$ : 453.2042, Found 453.2024.

### 2,2,2-Trifluoroethyl (3*R*)-2,3-dibenzyl-4-oxobutanoate, **13i**:

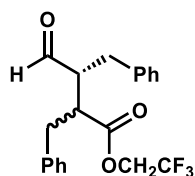

**13i** was synthesized by following the general procedure C at 0.1 mmol scale by **12i** and purified by silica gel column chromatography using pentane/ $\text{Et}_2\text{O}$  (9.5:0.5) as eluting solvent. **13i** was obtained as a colorless oil (20 mg, 55%):  $dr$  1:1,  $[\alpha]_D^{25}$  = -5.50 ( $c$  = 0.35,  $\text{CHCl}_3$ ).  $^1\text{H NMR}$  (600 MHz,  $\text{CDCl}_3$ )  $\delta$  9.78 (s, 0.3H), 9.68 (d,  $J$  = 1.5 Hz, 1H), 7.29 (td,  $J$  = 7.4, 4.9 Hz, 5.2H), 7.25 – 7.21 (m, 3.2H), 7.14 (dd,  $J$  = 9.0, 7.2 Hz, 4.4H), 7.10 – 7.05 (m, 1.4H), 4.54 – 4.36 (m, 1.7H), 4.36

– 4.22 (m, 1.6H), 3.31 (dt,  $J = 8.9, 6.4$  Hz, 1.1H), 3.22 – 3.02 (m, 3.7H), 3.00 – 2.87 (m, 4.8H).  $^{13}\text{C}$  NMR (151 MHz,  $\text{CDCl}_3$ )  $\delta$  202.14, 201.85, 172.20, 171.67, 137.74, 129.16, 129.08, 129.01, 128.92, 128.85, 128.79, 127.14, 127.02, 123.76 (q,  $J = 275.1$  Hz), 60.53 (q,  $J = 38.0$  Hz), 53.61, 53.35, 46.83, 45.94, 35.39, 35.38, 33.05, 32.84.  $^{19}\text{F}$  NMR (565 MHz,  $\text{CDCl}_3$ )  $\delta$  73.52, 73.53. **HRMS (ESI)** calculated for  $[\text{C}_{20}\text{H}_{19}\text{F}_3\text{O}_3, \text{M} + \text{Na}]^+$ : 387.1179, Found 387.1153. The enantiomeric excess of product **13i** determined to be 97% and 97% respectively, after conversion to lactone **13ia**.

**(4R)-3,4-Dibenzylidihydrofuran-2(3H)-one, 13ia:**

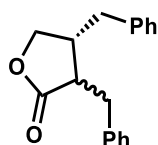

**13ia** was synthesized by following the general procedure E at 0.2 mmol scale from **13i** and purified by silica gel column chromatography using hexanes/EtOAc (5:1) as eluting solvent. **13ia** was obtained as a colorless oil (10.3 mg, 19% yield, 3:2 dr, 97%/97% ee). HPLC conditions: Chiralpak IC column (25 cm  $\times$  0.46 cm ID), hexanes/IPA = 90:10, 0.8 mL/min, 210 nm UV detector: tR = 33.91 min (major), tR = 35.19 min (major) tR = 38.86 min (minor), 46.22 min (minor).  $[\alpha]_{\text{D}}^{25} = +14.7$  ( $c = 0.45$ ,  $\text{CHCl}_3$ ).  $^1\text{H}$  NMR (600 MHz,  $\text{CDCl}_3$ )  $\delta$  7.37 (t,  $J = 7.6$  Hz, 1H), 7.33 – 7.19 (m, 13H), 7.17 (d,  $J = 7.1$  Hz, 2H), 7.03 (d,  $J = 7.0$  Hz, 2H), 6.99 (d,  $J = 7.1$  Hz, 2H), 4.11 – 3.99 (m, 3H), 3.86 (dd,  $J = 9.2, 7.8$  Hz, 1H), 3.35 (dd,  $J = 15.0, 4.7$  Hz, 1H), 3.16 – 3.06 (m, 2H), 3.02 – 2.93 (m, 2H), 2.85 (dd,  $J = 15.0, 10.9$  Hz, 1H), 2.71 – 2.60 (m, 3H), 2.55 – 2.46 (m, 2H), 2.39 (dd,  $J = 13.7, 12.5$  Hz, 1H).  $^{13}\text{C}$  NMR (151 MHz,  $\text{CDCl}_3$ )  $\delta$  178.51, 177.96 138.60, 137.96, 137.71, 129.32, 128.98, 128.84, 128.76, 128.75, 128.61, 128.41, 126.93, 126.80, 126.75, 126.71, 71.18, 69.43, 46.45, 45.29, 41.32, 39.92, 38.53, 35.05, 32.93, 30.88. **HRMS (ESI)** calculated for  $[\text{C}_{18}\text{H}_{18}\text{O}_2, \text{M} + \text{Na}]^+$ : 289.1199, Found 289.1140.

**2,2,2-Trifluoroethyl (3R)-3-benzyl-2-(2-(methylthio)ethyl)-4-oxobutanoate, 13j:**

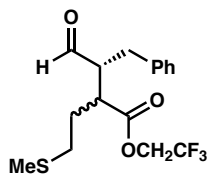

**13j** was synthesized by following the general procedure C at 0.1 mmol scale from **12j** and purified by silica gel column chromatography using pentane/Et<sub>2</sub>O (9.5:0.5) as eluting solvent. **13j** was

obtained as a colorless oil (15 mg, 43%): *dr* 1:1.7,  $[\alpha]_{\text{D}}^{25} = -23.63$  ( $c = 0.11$ ,  $\text{CHCl}_3$ ).  $^1\text{H NMR}$  (600 MHz,  $\text{CDCl}_3$ )  $\delta$  9.75 (s, 0.6H), 9.68 (d,  $J = 1.5$  Hz, 1H), 7.31 (t,  $J = 7.9$  Hz, 4H), 7.25 – 7.21 (m, 2H), 7.20 – 7.15 (m, 4H), 4.62 – 4.31 (m, 3.9H), 3.19 – 3.00 (m, 5.7H), 2.88 (dd,  $J = 13.5, 5.5$  Hz, 0.7H), 2.80 (dd,  $J = 13.3, 5.0$  Hz, 1.2H), 2.62 – 2.50 (m, 2.2H), 2.48 – 2.42 (m, 2.2H), 2.20 – 2.07 (m, 2H), 2.06 (d,  $J = 7.3$  Hz, 6H), 1.94 – 1.71 (m, 2H).  $^{13}\text{C NMR}$  (151 MHz,  $\text{CDCl}_3$ )  $\delta$  201.86, 201.83, 172.35, 171.97, 137.74, 137.67, 129.14, 129.09, 129.07, 128.95, 128.94, 127.05, 125.67, 123.90 (q,  $J = 276.0$  Hz), 123.84 (q,  $J = 276.6$  Hz), 122.06, 122.00, 120.16, 60.95 (q,  $J = 35.0$  Hz), 60.79 (q,  $J = 36.0$  Hz), 54.34, 54.30, 43.71, 42.94, 33.09, 32.71, 32.01, 31.80, 28.49, 28.36, 15.46, 15.41.  $^{19}\text{F NMR}$  (565 MHz,  $\text{CDCl}_3$ )  $\delta$  73.50 (m). **HRMS (ESI)** calculated for  $[\text{C}_{16}\text{H}_{19}\text{F}_3\text{O}_3\text{S}, \text{M} + \text{Na}]^+$ : 371.0899, Found 371.0915. The enantiomeric excess of product **13j** determined to be 99% and 97% respectively, after conversion to diesters **13ja** and **13jb**.

**(2*R*)-2-Benzyl-3-(2-(methylthio)ethyl)butane-1,4-diyl dibenzoate, 13ja and 13jb:**

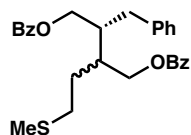

**13ja** and **13jb** were synthesized by following the general procedure F at 0.25 mmol scale from **13j** and purified by silica gel column chromatography using hexanes/EtOAc (5:1) as eluting solvent to yield separable diastereomers.

**13ja** (diastereomer 1) was obtained as a colorless oil (12.9 mg, 11% yield, 97% ee): HPLC conditions: Chiralpak IC column (25 cm  $\times$  0.46 cm ID), hexanes/IPA = 95:5, 0.8 mL/min, 230 nm UV detector,  $t_{\text{R}} = 22.42$  min (major) and  $t_{\text{R}} = 25.17$  min (minor).  $[\alpha]_{\text{D}}^{25} = +13.8$  ( $c = 0.39$ ,  $\text{CHCl}_3$ ).  $^1\text{H NMR}$  (400 MHz,  $\text{CDCl}_3$ )  $\delta$  8.03 – 7.93 (m, 4H), 7.61 – 7.51 (m, 2H), 7.43 (m, 4H), 7.33 – 7.24 (m, 3H), 7.21 (m, 3H), 4.55 – 4.39 (m, 2H), 4.42 – 4.27 (m, 2H), 2.90 (dd,  $J = 13.8, 6.2$  Hz, 1H), 2.83 – 2.72 (m, 1H), 2.74 – 2.63 (m, 1H), 2.65 – 2.53 (m, 1H), 2.53 – 2.39 (m, 1H), 2.37 – 2.25 (m, 1H), 1.99 – 1.76 (m, 2H).  $^{13}\text{C NMR}$  (151 MHz,  $\text{CDCl}_3$ )  $\delta$  166.50, 166.45, 139.81, 133.10, 133.05, 130.02, 130.00, 129.57, 128.99, 128.65, 128.51, 128.48, 128.44, 126.39, 65.46, 65.08, 41.26, 37.67, 35.09, 32.47, 28.03, 15.57. **HRMS (ESI)** calculated for  $[\text{C}_{28}\text{H}_{30}\text{O}_4\text{S}, \text{M} + \text{Na}]^+$ : 485.1757, Found 483.1745.

**13jb** (diastereomer 2) was obtained as a colorless oil (13.5 mg, 12% yield, 99% ee): HPLC conditions: Chiralpak IC column (25 cm  $\times$  0.46 cm ID), hexanes/IPA = 95:5, 0.8 mL/min, 230 nm

UV detector, tR = 17.97 min (major) and tR = 20.72 min (minor).  $[\alpha]_D^{25} = +8.9$  (c = 0.38, CHCl<sub>3</sub>). <sup>1</sup>H NMR (400 MHz, CDCl<sub>3</sub>) δ 8.06 – 8.00 (m, 2H), 8.01 – 7.93 (m, 2H), 7.61 – 7.51 (m, 2H), 7.48 – 7.36 (m, 4H), 7.32 – 7.24 (m, 2H), 7.24 – 7.16 (m, 3H), 4.51 (dd, J = 11.5, 6.1 Hz, 1H), 4.46 – 4.35 (m, 2H), 4.30 (dd, J = 11.4, 5.3 Hz, 1H), 2.91 (dd, J = 13.9, 6.0 Hz, 1H), 2.80 (dd, J = 13.9, 8.9 Hz, 1H), 2.65 – 2.51 (m, 2H), 2.50 – 2.38 (m, 1H), 2.35 – 2.23 (m, 1H), 2.06 (s, 3H), 1.97 – 1.80 (m, 2H). <sup>13</sup>C NMR (151 MHz, CDCl<sub>3</sub>) δ 166.55, 166.46, 139.75, 133.14, 133.06, 130.02, 130.00, 129.57, 129.55, 129.00, 128.66, 128.51, 128.44, 126.38, 65.10, 64.80, 41.40, 37.99, 35.37, 32.36, 28.57, 15.50. HRMS (ESI) calculated for [C<sub>28</sub>H<sub>30</sub>O<sub>4</sub>S, M + Na]<sup>+</sup>: 485.1757, Found 485.1755.

**2,2,2-Trifluoroethyl (3R)-3-benzyl-2-(4-hydroxybenzyl)-4-oxobutanoate, 13k:**

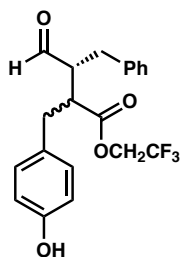

**13k** was synthesized by following the general procedure C at 0.1 mmol scale from **12k** and purified by silica gel column chromatography using hexanes/EtOAc (8.0:2.0) as eluting solvent. **13k** was obtained as a colorless oil (25 mg, 66%): *dr* 2:1,  $[\alpha]_D^{25} = -5.83$  (c = 0.26, CHCl<sub>3</sub>). <sup>1</sup>H NMR (600 MHz, CDCl<sub>3</sub>) δ 9.76 (d, J = 1.5 Hz, 0.35H), 9.66 (d, J = 1.5 Hz, 1H), 7.29 (dt, J = 7.7, 6.6 Hz, 4H), 7.25 – 7.20 (m, 3H), 7.17 – 7.12 (m, 3H), 7.10 – 7.07 (m, 1H), 6.99 (d, J = 8.4 Hz, 2H), 6.93 (d, J = 8.5 Hz, 1H), 6.74 (dd, J = 13.6, 8.5 Hz, 3H), 5.06 (brs, 2H), 4.49 – 4.36 (m, 2H), 4.35 – 4.21 (m, 2H), 3.24 (dt, J = 8.9, 6.5 Hz, 1H), 3.17 – 3.11 (m, 0.74H), 3.06 – 3.01 (m, 2H), 2.98 – 2.93 (m, 2H), 2.86 (ddd, J = 28.1, 14.0, 6.0 Hz, 4H). <sup>13</sup>C NMR (151 MHz, CDCl<sub>3</sub>) δ 202.28, 202.01, 172.26, 171.74, 154.72, 154.65, 137.76, 137.66, 130.23, 130.14, 129.74, 129.15, 129.09, 128.92, 127.02, 126.99, 123.85 (q, J = 276.2 Hz), 123.78 (q, J = 275.6 Hz), 115.69, 115.62, 60.76 (q, J = 36.0 Hz), 60.62 (q, J = 36.0 Hz), 53.57, 53.26, 47.10, 46.24, 34.60, 34.55, 33.04, 32.88. <sup>19</sup>F NMR (565 MHz, CDCl<sub>3</sub>) δ 73.49 (t, J = 8.7) 73.74 (t, J = 8.9). HRMS (ESI) calculated for [C<sub>20</sub>H<sub>19</sub>F<sub>3</sub>O<sub>4</sub>, M + Na]<sup>+</sup>: 403.1128, Found 403.1154. The enantiomeric excess of product **13k** determined to be 97% and 96% for the major and minor diastereomers, respectively, after conversion to lactone **13ka**.

**(4*R*)-4-Benzyl-3-(4-hydroxybenzyl)dihydrofuran-2(3*H*)-one, 13ka:**

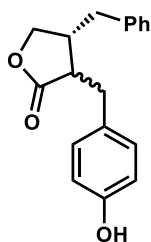

**13ka** was synthesized by following the general procedure E at 0.1 mmol scale from **13k** and purified by silica gel column chromatography using hexanes/EtOAc (8:2) as eluting solvent. **13ka** was obtained as a colorless oil (10 mg, 35%): *dr* 2:1 97% ee, 96% ee. HPLC conditions: Chiralpak IC column (25 cm × 0.46 cm ID), hexanes/IPA = 80:20, 0.9 mL/min, 230 nm UV detector, *dr*1 tR = 19.44 min (major) and tR = 22.273 min (minor), *dr*2 tR = 28.70 min (major) and tR = 28.42 min (minor).  $[\alpha]_D^{25} = +16.87$  (c = 1.1, CHCl<sub>3</sub>). **<sup>1</sup>H NMR** (600 MHz, C<sub>6</sub>D<sub>6</sub>) δ 7.08 – 6.97 (m, 4H), 6.86 (d, *J* = 8.4 Hz, 1.5H), 6.81 (d, *J* = 8.4 Hz, 0.9H), 6.69 – 6.63 (m, 2H), 6.55 (d, *J* = 8.5 Hz, 0.9H), 6.49 (d, *J* = 8.5 Hz, 1.43H), 4.31 (brs, 0.5H), 4.24 (brs, 0.7H), 3.60 (d, *J* = 9.1 Hz, 0.7H), 3.42 (dd, *J* = 8.9, 7.1 Hz, 1H), 3.22 (dd, *J* = 9.2, 4.0 Hz, 0.7H), 3.18 – 3.12 (m, 1H), 2.81 – 2.65 (m, 1.9H), 2.58 – 2.45 (m, 1.3H), 2.43 – 2.37 (m, 0.6H), 2.16 (dd, *J* = 13.7, 4.7 Hz, 1H), 2.03 – 1.92 (m, 2.7H), 1.81 (dd, *J* = 13.7, 8.7 Hz, 1H). **<sup>13</sup>C NMR** (151 MHz, C<sub>6</sub>D<sub>6</sub>) δ 177.96, 177.29, 155.52, 155.26, 139.20, 138.69, 130.88, 130.85, 129.85, 129.81, 129.21, 128.81, 128.33, 128.14, 127.98, 115.72, 115.68, 70.56, 68.68, 46.74, 46.63, 45.30, 38.37, 38.25, 33.97, 30.41, 30.23. **HRMS (ESI)** calculated for [C<sub>18</sub>H<sub>18</sub>O<sub>3</sub>, M + Na]<sup>+</sup>: 305.1148, Found 305.1120.

**2,2,2-Trifluoroethyl (3*R*)-3-benzyl-2-(3-hydroxybenzyl)-4-oxobutanoate, 13l:**

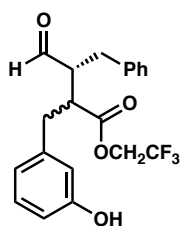

**13l** was synthesized by following the general procedure C at 0.1 mmol scale from **12l** and purified by silica gel column chromatography using hexanes/EtOAc (8:1) as eluting solvent. **13l** was obtained as a colorless oil (18.2 mg, 48% yield, 5:4 *dr*):  $[\alpha]_D^{25} = -4.4$  (c = 0.91, CHCl<sub>3</sub>). **<sup>1</sup>H NMR** (600 MHz, CDCl<sub>3</sub>) δ 9.70 (s, 1H), 9.59 (d, *J* = 1.5 Hz, 1H), 7.25 – 7.20 (m, 4H), 7.19 (m, 2H), 7.10 – 6.98 (m, 6H), 6.62 (dd, *J* = 8.4, 2.3 Hz, 3H), 6.56 (d, *J* = 7.5 Hz, 1H), 6.51 (s, 1H), 6.41 (t,



$J = 2.1$  Hz, 1H), 5.00 – 4.76 (m, 2H), 4.34 (dd,  $J = 12.9, 8.4$  Hz, 2H), 4.30 – 4.19 (m, 2H), 3.25 – 3.18 (m, 1H), 3.13 – 3.05 (m, 1H), 3.02 – 2.76 (m, 10H).  $^{13}\text{C}$  NMR (151 MHz,  $\text{CDCl}_3$ )  $\delta$  202.22, 201.91, 172.08, 171.56, 155.81, 155.74, 139.46, 137.63, 137.52, 129.98, 129.94, 129.06, 129.03, 128.82, 126.93, 126.88, 121.33, 121.19, 115.72, 114.01, 113.92, 60.71, 60.46, 53.44, 53.22, 46.55, 45.47, 35.06, 35.05, 32.94, 32.67.  $^{19}\text{F}$  NMR (565 MHz,  $\text{CDCl}_3$ )  $\delta$  -73.47. HRMS (ESI) calculated for  $[\text{C}_{20}\text{H}_{19}\text{F}_3\text{O}_4, \text{M} + \text{Na}]^+$ : 403.1128, Found 403.1158. The enantiomeric excess of product **13I** determined to be 98% and 83% for the major and minor diastereomers, respectively, after conversion to lactone **13Ia**.

**(4*R*)-4-Benzyl-3-(3-hydroxybenzyl)dihydrofuran-2(3*H*)-one, 13Ia:**

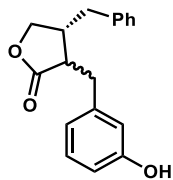

**13Ia** was synthesized by following the general procedure E at 0.05 mmol scale from **13I** and purified by silica gel column chromatography using hexanes/EtOAc (3:1) as eluting solvent. **13Ia** was obtained as a colorless oil (2.8 mg, 20% yield, 5:4 dr, 98%/83% ee). HPLC conditions: Chiralcel OJ-H column (25 cm  $\times$  0.46 cm ID), hexanes/IPA = 80:20, 0.8 mL/min, 210 nm UV detector:  $t_R = 28.83$  min (minor),  $t_R = 30.43$  min (major),  $t_R = 33.90$  min (minor) and  $t_R = 38.14$  min (major).  $[\alpha]_D^{25} = +11.7$  ( $c = 0.12$ ,  $\text{CDCl}_3$ ).  $^1\text{H}$  NMR (600 MHz,  $\text{CDCl}_3$ )  $\delta$  7.28 (m, 6H), 7.22 (m, 2H), 7.17 (t,  $J = 7.8$  Hz, 1H), 7.07 – 6.99 (m, 3H), 6.88 (d,  $J = 7.6$  Hz, 1H), 6.78 (t,  $J = 2.1$  Hz, 1H), 6.74 (dd,  $J = 8.0, 2.6$  Hz, 1H), 6.73 – 6.68 (m, 2H), 6.58 (t,  $J = 2.1$  Hz, 1H), 4.78 (s, 1H), 4.72 (s, 1H), 4.13 – 4.08 (m, 1H), 4.08 – 3.99 (m, 2H), 3.90 – 3.84 (m, 1H), 3.30 (dd,  $J = 15.1, 4.7$  Hz, 1H), 3.11 (ddd,  $J = 11.5, 7.2, 4.7$  Hz, 1H), 3.00 (td,  $J = 15.7, 14.9, 4.7$  Hz, 2H), 2.92 (dd,  $J = 14.1, 7.0$  Hz, 1H), 2.80 (dd,  $J = 15.1, 10.9$  Hz, 1H), 2.75 – 2.64 (m, 2H), 2.61 (ddd,  $J = 8.7, 7.0, 5.3$  Hz, 1H), 2.57 – 2.46 (m, 2H), 2.38 (dd,  $J = 13.7, 12.4$  Hz, 1H).  $^{13}\text{C}$  NMR (151 MHz,  $\text{CDCl}_3$ )  $\delta$  178.58, 177.96, 155.85, 155.78, 140.55, 139.47, 138.45, 138.00, 130.05, 129.93, 128.99, 128.79, 128.70, 126.80, 126.72, 121.81, 120.86, 116.04, 115.33, 113.91, 113.71, 71.26, 69.49, 46.28, 45.14, 41.21, 39.90, 38.55, 34.68, 32.94, 30.74. HRMS (ESI) calculated for  $[\text{C}_{18}\text{H}_{18}\text{O}_3, \text{M} + \text{Na}]^+$ : 305.1148, Found 305.1177.

**(R)-2-Benzyl-4-oxo-4-phenylbutanal, 15a:**

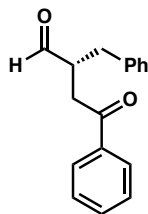

**15a** was synthesized by following the general procedure D at 0.1 mmol scale from **14a** and purified by silica gel column chromatography using Hexane/EtOAc (9:1) as eluting solvent. **15a** was obtained as a colorless oil (18 mg, 70%): 93% ee. HPLC conditions: Chiralpak IC column (25 cm × 0.46 cm ID), hexanes/IPA = 90:10, 0.8 mL/min, 220 nm UV detector, tR = 30.26 min (maJor) and tR = 23.98 min (minor).  $[\alpha]_D^{25} = -7.27$  (c = 0.1, CHCl<sub>3</sub>). **<sup>1</sup>H NMR** (400 MHz, CDCl<sub>3</sub>) δ 9.90 (s, 1H), 7.91 (dd, *J* = 8.4, 1.3 Hz, 2H), 7.61 – 7.53 (m, 1H), 7.45 (dd, *J* = 8.3, 7.0 Hz, 2H), 7.34 – 7.27 (m, 2H), 7.25 – 7.16 (m, 3H), 3.52 – 3.32 (m, 2H), 3.17 (dd, *J* = 13.9, 6.1 Hz, 1H), 3.08 – 2.96 (m, 1H), 2.83 (dd, *J* = 13.9, 8.1 Hz, 1H). **<sup>13</sup>C NMR** (101 MHz, CDCl<sub>3</sub>) δ 203.1, 198.0, 138.3, 136.6, 133.5, 129.2, 128.9, 128.8, 128.2, 126.9, 48.5, 37.4, 34.9. **HRMS (ESI)** calculated for [C<sub>17</sub>H<sub>16</sub>O<sub>2</sub>, M + Na]<sup>+</sup>: 275.1043, Found 275.1048.

**(R)-2-Benzyl-4-oxo-4-(*p*-tolyl)butanal, 15b:**

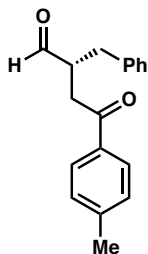

**15b** was synthesized by following the general procedure D at 0.1 mmol scale from **14b** and purified by silica gel column chromatography using Hexane/EtOAc (9:1) as eluting solvent. **15b** was obtained as a colorless oil (16 mg, 60%): 93% ee. HPLC conditions: Chiralpak IC column (25 cm × 0.46 cm ID), hexanes/IPA = 90:10, 1.0 mL/min, 254 nm UV detector, tR = 39.56 min (maJor) and tR = 32.94 min (minor).  $[\alpha]_D^{25} = +7.99$  (c = 0.12, CHCl<sub>3</sub>). **<sup>1</sup>H NMR** (600 MHz, CDCl<sub>3</sub>) δ 9.90 (s, 1H), 7.81 (d, *J* = 8.3 Hz, 2H), 7.30 (dd, *J* = 8.1, 6.7 Hz, 2H), 7.25 – 7.18 (m, 5H), 3.45 – 3.34 (m, 2H), 3.16 (dd, *J* = 13.9, 6.1 Hz, 1H), 3.04 – 2.96 (m, 1H), 2.82 (dd, *J* = 13.9, 8.0 Hz, 1H), 2.40 (s, 3H). **<sup>13</sup>C NMR** (151 MHz, CDCl<sub>3</sub>) δ 203.3, 197.6, 144.4, 138.3, 134.1, 129.4, 129.2, 128.9, 128.3, 126.8, 48.5, 37.3, 34.9, 21.8. **HRMS (ESI)** calculated for [C<sub>18</sub>H<sub>18</sub>O<sub>2</sub>, M + Na]<sup>+</sup>: 289.1199,

Found 289.1207.

**(R)-2-Benzyl-4-(4-bromophenyl)-4-oxobutanal, 15c:**

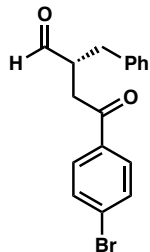

**15c** was synthesized by following the general procedure D at 0.20 mmol scale from **14c** and purified by silica gel column chromatography using hexanes/EtOAc (9:1) as eluting solvent. **15c** was obtained as a colorless oil (27.3 mg, 41% yield, 90% ee): HPLC conditions: Chiralpak IC column (25 cm × 0.46 cm ID), hexanes/IPA = 90:10, 0.8 mL/min, 254 nm UV detector, t<sub>R</sub> = 20.31 min (minor) and t<sub>R</sub> = 22.30 min (major). [α]<sub>D</sub><sup>25</sup> = +10.5 (c = 1.10, CHCl<sub>3</sub>). <sup>1</sup>H NMR (400 MHz, CDCl<sub>3</sub>) δ 9.89 (s, 1H), 7.76 (d, *J* = 8.5 Hz, 2H), 7.58 (d, *J* = 8.6 Hz, 2H), 7.31 (t, *J* = 7.2 Hz, 2H), 7.28 – 7.15 (m, 3H), 3.47 – 3.31 (m, 2H), 3.23 – 3.12 (m, 1H), 2.94 (d, *J* = 13.5 Hz, 1H), 2.82 (dd, *J* = 14.0, 8.2 Hz, 1H). <sup>13</sup>C NMR (151 MHz, CDCl<sub>3</sub>) δ 202.84, 196.92, 137.93, 135.16, 131.96, 129.60, 129.03, 128.83, 128.58, 126.86, 48.40, 37.05, 34.67. HRMS (ESI) calculated for [C<sub>17</sub>H<sub>15</sub>BrO<sub>2</sub>, M + Na]<sup>+</sup>: 353.0148, Found 353.0169, 355.0151.

**(R)-2-Benzyl-4-(4-chlorophenyl)-4-oxobutanal, 15d:**

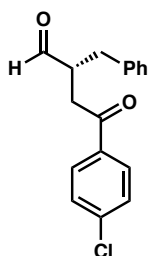

**15d** was synthesized by following the general procedure D at 0.1 mmol scale from **14d** and purified by silica gel column chromatography using Hexane/EtOAc (9:1) as eluting solvent. **15d** was obtained as a colorless oil (20.5 mg, 72%): 82% ee. HPLC conditions: Chiralpak IC column (25 cm × 0.46 cm ID), hexanes/IPA = 90:10, 1.0 mL/min, 254 nm UV detector, t<sub>R</sub> = 21.75 min (major) and t<sub>R</sub> = 19.51 min (minor). [α]<sub>D</sub><sup>25</sup> = +9.59 (c = 0.25, CHCl<sub>3</sub>). <sup>1</sup>H NMR (600 MHz, CDCl<sub>3</sub>) δ 9.89 (s, 1H), 7.84 (d, *J* = 8.6 Hz, 2H), 7.41 (d, *J* = 8.6 Hz, 2H), 7.30 (t, *J* = 7.5 Hz, 2H), 7.23 (t, *J* = 7.4

Hz, 1H), 7.21 – 7.17 (m, 2H), 3.44 – 3.32 (m, 2H), 3.17 (dd,  $J = 14.0, 6.1$  Hz, 1H), 3.01 – 2.91 (m, 1H), 2.82 (dd,  $J = 13.9, 8.1$  Hz, 1H).  $^{13}\text{C}$  NMR (151 MHz,  $\text{CDCl}_3$ )  $\delta$  203.0, 196.8, 139.9, 138.0, 134.9, 129.6, 129.1, 129.1, 128.9, 127.0, 48.5, 37.2, 34.8. HRMS (ESI) calculated for  $[\text{C}_{17}\text{H}_{15}\text{ClO}_2, \text{M} + \text{Na}]^+$ : 309.0653, Found 309.0629.

**(R)-2-Benzyl-4-(4-fluorophenyl)-4-oxobutanal, 15e:**

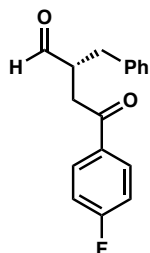

**15e** was synthesized by following the general procedure D at 0.1 mmol scale from **14e** and purified by silica gel column chromatography using Hexane/EtOAc (9:1) as eluting solvent. **15e** was obtained as a colorless oil (15.8 mg, 58%): 84% ee. HPLC conditions: Chiralpak IC column (25 cm  $\times$  0.46 cm ID), hexanes/IPA = 90:10, 1.0 mL/min, 254 nm UV detector,  $t_R = 23.08$  (major) and  $t_R = 18.92$  min (minor).  $[\alpha]_D^{25} = -9.83$  ( $c = 0.30, \text{CHCl}_3$ ).  $^1\text{H}$  NMR (400 MHz,  $\text{CDCl}_3$ )  $\delta$  9.89 (s, 1H), 7.93 (dd,  $J = 8.9, 5.4$  Hz, 2H), 7.34 – 7.27 (m, 2H), 7.26 – 7.17 (m, 3H), 7.11 (t,  $J = 8.6$  Hz, 2H), 3.47 – 3.32 (m, 2H), 3.23 – 3.11 (m, 1H), 3.02 – 2.90 (m, 1H), 2.82 (dd,  $J = 13.9, 8.0$  Hz, 1H).  $^{13}\text{C}$  NMR (101 MHz,  $\text{CDCl}_3$ )  $\delta$  203.0, 196.4, 166.0 (d,  $^1J = 255.2$  Hz, Cq), 138.1, 133.0 (d,  $^4J = 2.9$  Hz, Cq), 130.8 (d,  $^3J = 9.4$  Hz, CH), 129.2, 128.9, 126.9, 115.8 (d,  $^2J = 21.9$  Hz, CH), 48.5, 37.2, 34.8.  $^{19}\text{F}$  NMR (376 MHz,  $\text{CDCl}_3$ )  $\delta$  -104.7. HRMS (ESI) calculated for  $[\text{C}_{17}\text{H}_{15}\text{FO}_2, \text{M} + \text{Na}]^+$ : 293.0948, Found 293.0971.

**(R)-2-Benzyl-4-(2-fluorophenyl)-4-oxobutanal, 15f:**

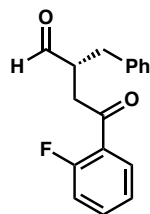

**15f** was synthesized by following the general procedure D at 0.20 mmol scale from **14f** and purified by silica gel column chromatography using hexanes/EtOAc (9:1) as eluting solvent. **15f** was obtained as a colorless oil (26.9 mg, 50% yield, 90% ee): HPLC conditions: Chiralpak IC

column (25 cm × 0.46 cm ID), hexanes/IPA = 90:10, 0.8 mL/min, 230 nm UV detector, tR = 20.16 min (minor) and tR = 23.69 min (major).  $[\alpha]_D^{25} = -2.1$  (c = 1.35, CHCl<sub>3</sub>). <sup>1</sup>H NMR (400 MHz, CDCl<sub>3</sub>) δ 9.87 (s, 1H), 7.83 (td, J = 7.6, 1.9 Hz, 1H), 7.51 (tdd, J = 7.4, 5.0, 1.9 Hz, 1H), 7.29 (d, J = 7.4 Hz, 2H), 7.21 (tt, J = 7.5, 4.6 Hz, 4H), 7.11 (dd, J = 11.3, 8.3 Hz, 1H), 3.50 – 3.31 (m, 2H), 3.16 (dd, J = 13.9, 5.9 Hz, 1H), 3.06 (dd, J = 14.4, 3.2 Hz, 1H), 2.78 (dd, J = 13.9, 8.0 Hz, 1H). <sup>13</sup>C NMR (151 MHz, CDCl<sub>3</sub>) δ 202.90, 196.07, 163.33, 160.80, 138.15, 134.93, 134.84, 130.63, 129.04, 128.73, 126.72, 124.47, 116.82, 116.58, 48.51, 42.41, 34.77. <sup>19</sup>F NMR (565 MHz, CDCl<sub>3</sub>) δ -108.63. HRMS (ESI) calculated for [C<sub>17</sub>H<sub>15</sub>FO<sub>2</sub>, M + Na]<sup>+</sup>: 293.0948, Found 293.0971.

**(R)-3-Benzyl-4-oxobutanenitrile, 15g:**

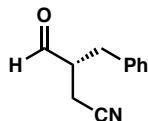

**15g** was synthesized by following the general procedure D at 0.1 mmol scale from **14g** and purified by silica gel column chromatography using hexanes/EtOAc (4:1) as eluting solvent. **15g** was obtained as a colorless oil (13.7 mg, 39% yield):  $[\alpha]_D^{26} = +8.0$  (c = 0.50, CHCl<sub>3</sub>). <sup>1</sup>H NMR (600 MHz, CDCl<sub>3</sub>) δ 9.78 (s, 1H), 7.35 (t, J = 7.4 Hz, 2H), 7.29 (t, J = 7.4 Hz, 1H), 7.21 (d, J = 6.9 Hz, 2H), 3.25 – 3.17 (m, 1H), 3.05 – 2.97 (m, 2H), 2.53 (dd, J = 17.1, 5.8 Hz, 1H), 2.45 (dd, J = 16.9, 5.7 Hz, 1H). <sup>13</sup>C NMR (151 MHz, CDCl<sub>3</sub>) δ 199.49, 135.91, 129.15, 128.98, 127.47, 117.62, 49.42, 34.10, 15.60. HRMS (ESI) calculated for [C<sub>11</sub>H<sub>11</sub>NO, M + Na]<sup>+</sup>: 196.0733, Found 196.0749. The enantiomeric excess of product **15g** determined to be 94% after conversion to ester **15ga**.

**(R)-2-Benzyl-3-cyanopropyl benzoate, 15ga:**

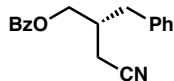

**15ga** was synthesized by following the general procedure F at 0.1 mmol scale from **15g** and purified by silica gel column chromatography using hexanes/EtOAc (3:1) as eluting solvent. **15ga** was obtained as a colorless oil (2.3 mg, 8% yield, 94% ee). HPLC conditions: Chiralpak IC column (25 cm × 0.46 cm ID), hexanes/IPA = 80:20, 0.8 mL/min, 230 nm UV detector, tR = 19.46 min (major) and tR = 22.86 min (minor).  $[\alpha]_D^{25} = +8.3$  (c = 0.12, CHCl<sub>3</sub>). <sup>1</sup>H NMR (400 MHz, CDCl<sub>3</sub>) δ 8.09 – 8.01 (m, 2H), 7.60 (td, J = 7.6, 1.3 Hz, 1H), 7.47 (dd, J = 8.3, 7.1 Hz, 2H), 7.34 (t, J = 7.2

Hz, 2H), 7.30 – 7.19 (m, 5H), 4.45 (dd,  $J = 11.4, 4.3$  Hz, 1H), 4.28 (dd,  $J = 11.4, 6.7$  Hz, 1H), 2.93 (dd,  $J = 13.9, 6.5$  Hz, 1H), 2.83 (dd,  $J = 13.9, 7.5$  Hz, 1H), 2.58 – 2.40 (m, 3H).  $^{13}\text{C}$  NMR (151 MHz,  $\text{CDCl}_3$ )  $\delta$  166.20, 137.43, 133.76, 133.38, 130.22, 129.67, 129.60, 129.05, 128.93, 128.56, 128.53, 127.04, 117.90, 65.62, 37.17, 36.66, 19.32. **HRMS (ESI)** calculated for  $[\text{C}_{18}\text{H}_{17}\text{NO}_2, \text{M} + \text{Na}]^+$ : 302.1151, Found 302.1112.

## 6. Mechanistic Studies

### A. Enantioconvergent Synthesis

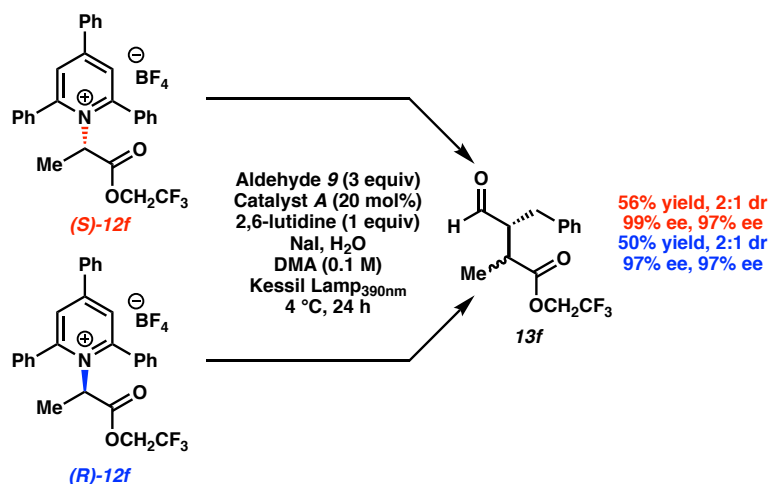

Following the general procedure C at 0.1 mmol scale, both enantiomers of alanine-derived Katritzky salt, **(S)-12f** and **(R)-12f**, were subjected to reaction conditions to test whether the same enantiomer of product would be favored. Alkylation product **13f** was synthesized from **(S)-12f** in 56% yield (2:1 dr, 99% ee, 97% ee) and from **(R)-12f** in 50% yield (2:1 dr, 97% ee, 97% ee). In both cases, the major enantiomer of both diastereomers of product **13f** was the same, as measured by chiral HPLC analysis of diester **13fa**. HPLC conditions: Chiralcel OJ\_H column (25 cm  $\times$  0.46 cm ID), hexanes/IPA = 70:30, 0.8 mL/min, 230 nm UV detector.

### B. Quantum Yield

The quantum yield of the reaction was determined using procedures reported previously by standard ferrioxalate actinometry.<sup>5</sup>

### *Determination of the light intensity at 390 nm*

The photon flux of the Kessil lamp (390 nm) was determined by standard ferrioxalate actinometry. A 0.15 M solution of ferrioxalate was prepared by dissolving potassium ferrioxalate hydrate (2.21 g) in 0.05 M H<sub>2</sub>SO<sub>4</sub> (30 mL). A buffered solution of phenanthroline was prepared by dissolving phenanthroline (50 mg) and sodium acetate (11.25 g) in 0.5 M H<sub>2</sub>SO<sub>4</sub> (50 mL). Both solutions were stored in the dark. To determine the photon flux of the Kessil lamp (390 nm), 2.0 mL of the ferrioxalate solution was placed in a vial and irradiated for 90 s. After irradiation, 0.35 mL of the phenanthroline solution was added to the vial, and the solution was stored in the dark for 1 h. The absorbance of the solution was measured at 510 nm. A non-irradiated sample was also prepared and the absorbance at 510 nm was measured. Conversion was calculated using eq 1.

$$\text{mol Fe}^{2+} = \frac{V \cdot \Delta A}{l \cdot \epsilon} \quad (1)$$

V is the total volume (0.00235 L),  $\Delta A$  is the difference in absorbance at 510 nm between the irradiated and non-irradiated solutions (0.587), l is the path length (1.00 cm), and  $\epsilon$  is the molar absorptivity at 510 nm (11,100 L mol<sup>-1</sup> cm<sup>-1</sup>). The mol Fe<sup>2+</sup> was calculated to be 1.24 x 10<sup>-7</sup>, which was then used to calculate the photon flux with eq 2.

$$\text{photon flux} = \frac{\text{mol Fe}^{2+}}{\Phi \cdot t \cdot f} \quad (2)$$

$\Phi$  is the quantum yield for the ferrioxalate actinometer (1.13 for a 0.15 M solution at 405 nm), t is the time (1800.0 s), and f is the fraction of light absorbed at 390 nm (> 0.999, A = 4.77, eq 3). The photon flux was calculated to be 1.22 x 10<sup>-9</sup> einstein s<sup>-1</sup>.

$$f = 1 - 10^{-A} \quad (3)$$

### *Determination of quantum yield*

Standard reaction conditions (0.1 mmol scale) with an NMR standard were employed in the same vial size with the same volume of solvent as performed for the photon flux calculation.

Pyridinium salt **10b** (0.1 mmol), aldehyde **9** (0.3 mmol), catalyst **A** (0.02 mmol), 2,6-lutidine (0.1 mmol), NaI (0.1 mmol), H<sub>2</sub>O (1.0 mmol) and PhCF<sub>3</sub> (0.1 mmol) were dissolved in DMA (2 mL) and were degassed via freeze-pump-thaw (three times) before irradiation at 390 nm for 1800 s (30 min). The yield of product formed was determined by <sup>19</sup>F NMR based on the PhCF<sub>3</sub> standard for

a diluted aliquot of the reaction sample in CDCl<sub>3</sub>. The quantum yield was determined using eq 4. Essentially all incident light is absorbed by the reaction mixture at 390 nm ( $f > 0.999$ ,  $A = 4.57$ , eq 3).

$$\Phi = \frac{\text{mol product}}{\text{flux} \cdot t \cdot f} \quad (4)$$

Based on the observed 9% yield (0.009 mmol product),  $\Phi(9\%) = 4$ .

### C. CT Complex Effect on Enamine Equilibrium<sup>6</sup>

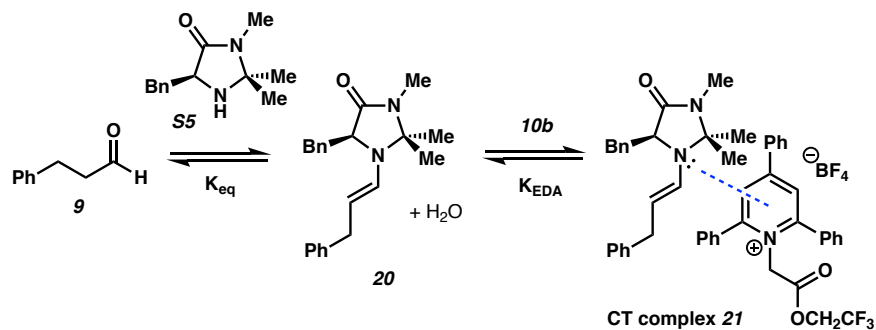

The equilibrium constants ( $K_{eq}$ ) for the formation of the enamine, generated upon condensation of amine catalyst **A** and aldehyde **9**, were determined by <sup>1</sup>H NMR spectroscopy. For these measurements, a 0.16 M stock solution of the *free base* of catalyst **A** (**S5**) was prepared in dry CD<sub>3</sub>CN with PhSiMe<sub>3</sub> as an internal standard. Multiple experiments were performed to calculate  $K_{eq}$  of **9** and **20** in the presence of other reaction components in the same relative proportions. After mixing the components in dry CD<sub>3</sub>CN with a total volume of 1 mL, solutions were stirred in the dark for 30 minutes to secure equilibration. The relative amount of enamine **20** in solution with respect to free catalyst **S5** was determined by integration of the following diagnostic peaks: doublet at 6.25 ppm ( $J = 13.8$  Hz, 1H) for enamine **20**; doublet of doublet at 3.70 ( $J = 8.8, 3.9$  Hz, 1H) for catalyst **S5**. The integration of **S5** and **20** compared to the internal standard PhSiMe<sub>3</sub> gave their concentrations, which could be used to calculate  $K_{eq}$  based on eq 5.

$$K_{eq} = \frac{[\mathbf{20}][\text{H}_2\text{O}]}{[\mathbf{S5}][\mathbf{9}]} = \frac{[\mathbf{20}]^2}{[\mathbf{S5}][0.3 \text{ M} - [\mathbf{S5}]}] \quad (5)$$

Sample 1: amine catalyst **S5** (0.02 mmol) and aldehyde **9** (0.3 mmol). Ratio of **S5:20** = 20.7:1. Calculated  $K_{eq} = 1.4 \times 10^{-4}$ .

Sample 2: amine catalyst **S5** (0.02 mmol), aldehyde **9** (0.3 mmol), and Katritzky salt **10b** (0.1 mmol). Ratio of **S5:20** = 11.2:1. Calculated  $K_{eq} = 4.8 \times 10^{-4}$ .

Sample 3: amine catalyst **S5** (0.02 mmol), aldehyde **9** (0.3 mmol), Katritzky salt **10b** (0.1 mmol),



NaI (0.1 mmol), and DMA (50  $\mu$ L). Ratio of **S5:20** = 5.1:1. Calculated  $K_{eq} = 2.1 \times 10^{-3}$ .

Sample 4: amine catalyst **S5** (0.02 mmol), aldehyde **9** (0.3 mmol), and 2,6-lutidine (0.1 mmol). Ratio of **S5:20** = 10.8:1. Calculated  $K_{eq} = 5.4 \times 10^{-4}$ .

#### D. Radical Probe Experiments

*cis-22* and *trans-22* aldehyde starting materials were prepared according to literature procedure.<sup>7</sup>

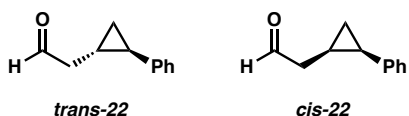

#### Photocatalyzed $\alpha$ -alkylation of aldehyde *trans-22*

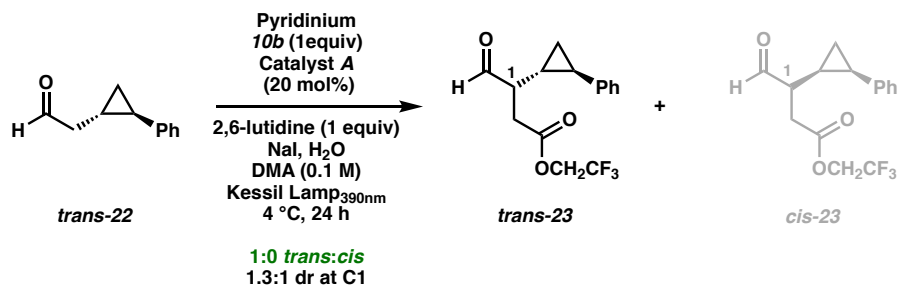

*trans-23* was synthesized by following the general procedure C using *trans-22* at 0.1 mmol scale and purified by silica gel column chromatography using hexanes/EtOAc (9.5:1.5) as eluting solvent. *trans-23* was obtained as a colorless oil (15 mg, 40%) as an inseparable 1.3:1 mixture of diastereomers at C1.

*trans-23*:  $[\alpha]_D^{25} = -9.99$  ( $c = 0.10$ ,  $\text{CHCl}_3$ ).  $^1\text{H NMR}$  (600 MHz,  $\text{C}_6\text{D}_6$ )  $\delta$  9.37 (s, 0.62H, minor), 9.34 (s, 0.82H, major), 7.13 – 7.08 (m, 3.2H), 7.07 – 7.00 (m, 1.7H), 6.83 – 6.79 (m, 1.3H), 6.79 – 6.74 (m, 1.7H), 4.06 (dd,  $J = 12.8, 8.6$  Hz, 0.8H), 4.00 – 3.94 (m, 1H), 3.89 – 3.79 (m, 1.7H), 2.48 (ddd,  $J = 21.7, 16.9, 8.2$  Hz, 1.8H), 2.08 (ddd,  $J = 16.8, 5.3, 4.0$  Hz, 1.8H), 1.71 (ddt,  $J = 10.2, 8.3, 5.6$  Hz, 1.9H), 1.51 (dt,  $J = 9.4, 5.0$  Hz, 1H), 1.30 (dd,  $J = 9.1, 4.6$  Hz, 2H), 1.18 – 1.06 (m, 0.5H), 0.61 (ddt,  $J = 10.9, 8.6, 5.2$  Hz, 1.7H), 0.58 – 0.45 (m, 2.7H), 0.34 (dt,  $J = 8.8, 5.0$  Hz, 0.8H).  $^{13}\text{C NMR}$  (151 MHz,  $\text{C}_6\text{D}_6$ )  $\delta$  199.5, 199.3, 169.8, 141.5, 141.4, 128.0, 127.8, 127.6, 126.0, 125.9, 125.9, 125.8, 59.9, 51.9, 51.8, 32.4, 32.2, 29.9, 22.0, 22.0, 21.1, 21.0, 14.1, 13.6.  $^{19}\text{F NMR}$  (565 MHz,  $\text{C}_6\text{D}_6$ )  $\delta$  -73.70 – -73.81 (m). **HRMS (ESI)** calculated for  $[\text{C}_{15}\text{H}_{15}\text{F}_3\text{O}_3, \text{M} + \text{Na}]^+$ : 323.0866, Found 323.0862.

*nOe* experiments on *trans*-23

The *trans* stereochemistry of the substituents on the cyclopropane ring was assigned based on *nOe* experiments on pure *trans*-23 as a mixture of diastereomers at C1. Selective excitation <sup>1</sup>H NMR spectra were recorded on a Varian Mercury 400 in C<sub>6</sub>D<sub>6</sub> (Figure S2).

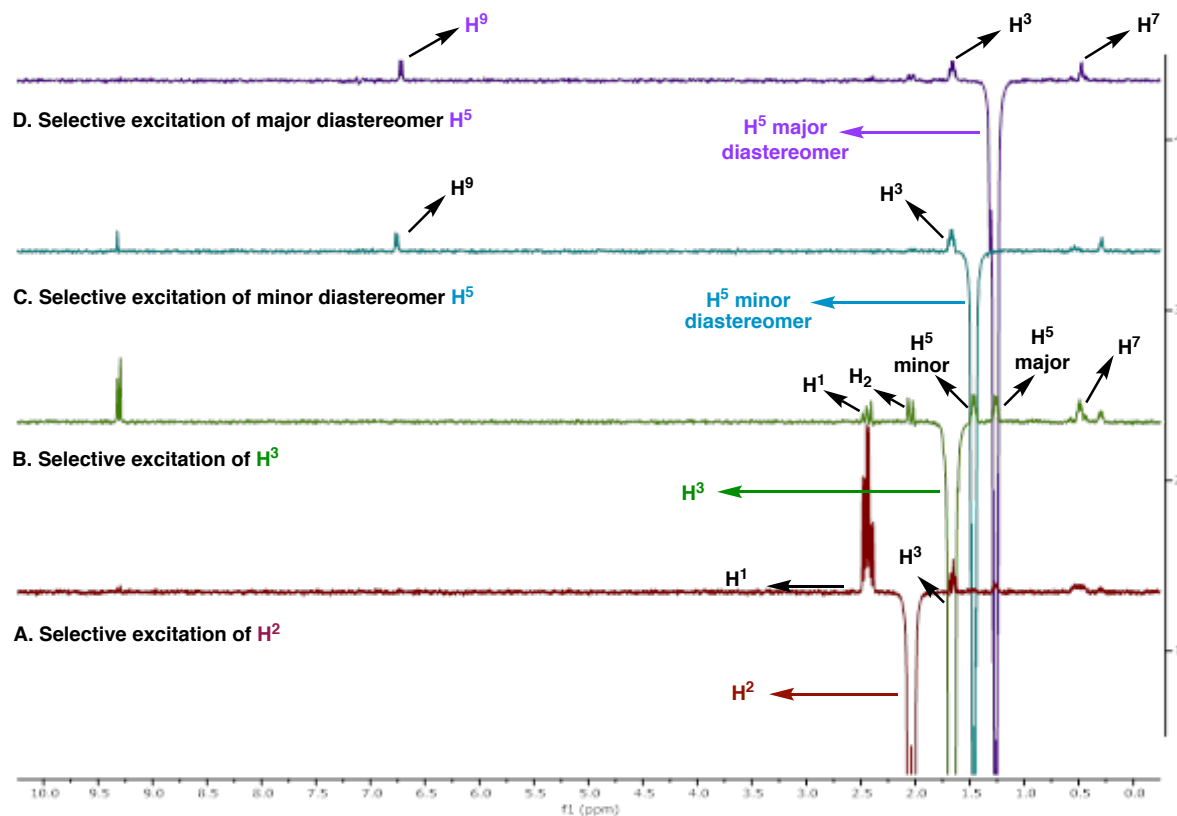

**Figure S2. Selective excitation experiments of H<sup>2</sup>, H<sup>3</sup>, H<sup>5</sup>(minor) and H<sup>5</sup> (major) on *trans*-23 (inseparable mixture of diastereomers)**

A. Selective excitation of H<sup>2</sup> shows a *nOe* interaction with H<sup>1</sup> and H<sup>3</sup>.

B. Selective excitation of H<sup>3</sup> shows a *nOe* interaction with H<sup>1</sup>, H<sup>2</sup>, H<sup>5</sup> (major and minor diastereomers) and H<sup>7</sup>.

C. Selective excitation of H<sup>5</sup> signal of the *minor* diastereomer shows a *nOe* interaction with H<sup>3</sup>, H<sup>7</sup>, and H<sup>9</sup>.

D. Selective excitation of H<sup>5</sup> signal of the *major* diastereomer shows a *nOe* interaction with H<sup>3</sup>, H<sup>7</sup>, and H<sup>9</sup>.

*trans*-23 was assigned the indicated relative stereochemistry based on key *nOe* interactions

between H<sup>3</sup>–H<sup>5</sup> and H<sup>5</sup>–H<sup>7</sup>, as shown in Figure S3.

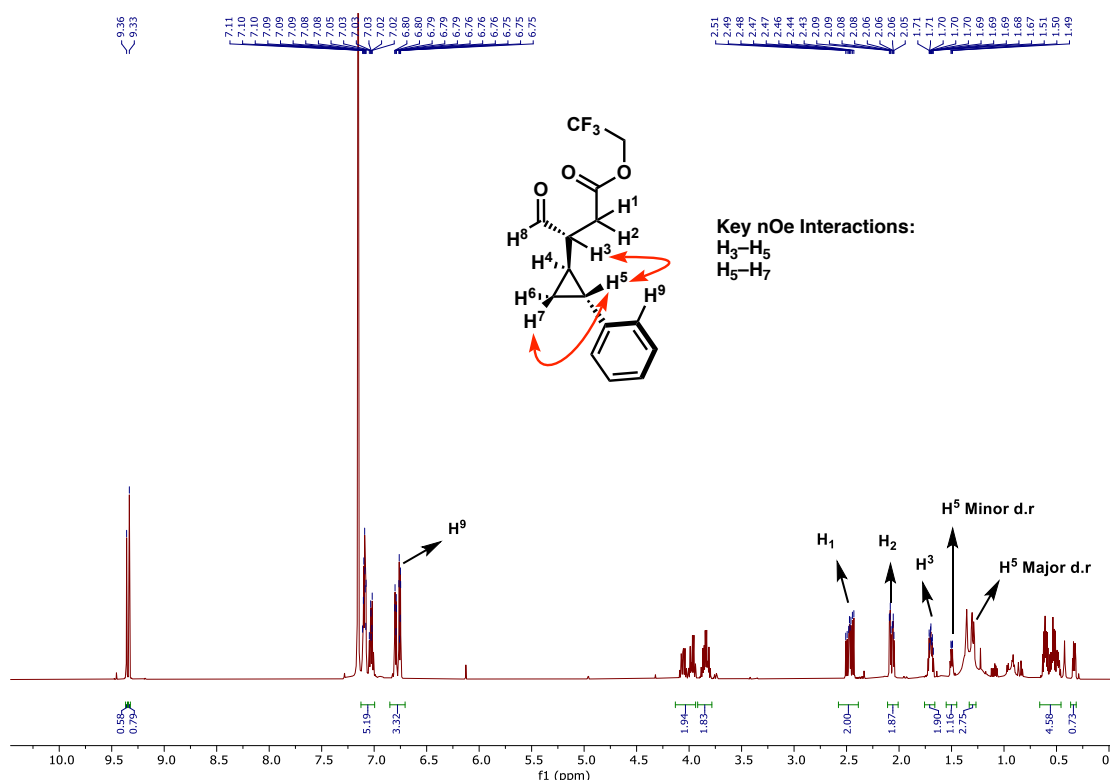

Figure S3. <sup>1</sup>H NMR spectrum of *trans*-23 diastereomers (inseparable mixture of diastereomers)

*Photocatalyzed α-alkylation of aldehyde cis-22.*

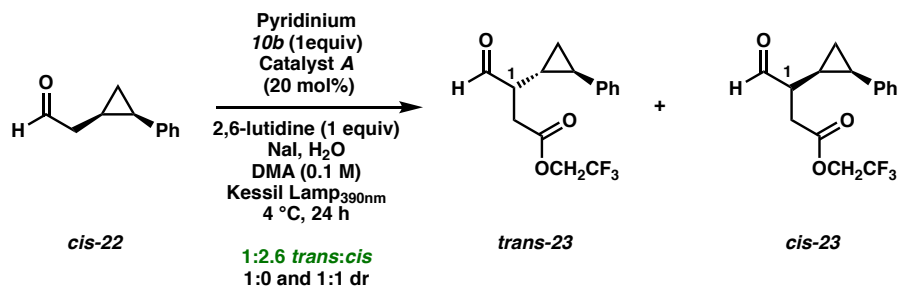

Following the general procedure C using *cis*-22 aldehyde as starting material at 0.1 mmol scale, both *cis*-23 and *trans*-23 alkylation products were formed in 2.6:1 ratio and purified by silica gel column chromatography using hexanes/EtOAc (9.5:1.5) as eluting solvent. *cis*-23 was obtained as a colorless oil (7.5 mg, 20%) as a single diastereomer. *trans*-23 was obtained as a colorless oil (3.0 mg, 8%) as an inseparable 1:1 mixture of diastereomers at C1 (see Figure S4).

*cis*-23:  $[\alpha]_{\text{D}}^{25} = -10.22$  ( $c = 0.19$ , CHCl<sub>3</sub>). <sup>1</sup>H NMR (600 MHz, C<sub>6</sub>D<sub>6</sub>)  $\delta$  (*cis* diastereomer) 9.20 (s,

1H), 7.07 (dd,  $J = 8.3, 6.9$  Hz, 2H), 7.01 (d,  $J = 7.4$  Hz, 1H), 6.97 – 6.94 (m, 2H), 3.97 (dq,  $J = 12.9, 8.6$  Hz, 1H), 3.83 (dq,  $J = 12.8, 8.6$  Hz, 1H), 2.48 (dd,  $J = 16.8, 7.0$  Hz, 1H), 2.16 (dd,  $J = 16.8, 5.9$  Hz, 1H), 2.01 – 1.82 (m, 3H), 0.68 (dtd,  $J = 11.1, 8.4, 5.9$  Hz, 1H), 0.62 – 0.52 (m, 3H).  $^{13}\text{C}$  NMR (151 MHz,  $\text{C}_6\text{D}_6$ )  $\delta$  199.6, 169.8, 137.7, 128.6, 128.3, 128.2, 126.4, 59.5, 46.1, 32.7, 21.2, 18.7, 7.9.  $^{19}\text{F}$  NMR (565 MHz,  $\text{C}_6\text{D}_6$ )  $\delta$  -73.75 (t,  $J = 8.2$  Hz). ESI-MS calcd for  $[\text{C}_{15}\text{H}_{15}\text{F}_3\text{O}_3, \text{M} + \text{Na}]^+$ : 323.0866, Found 323.0860.

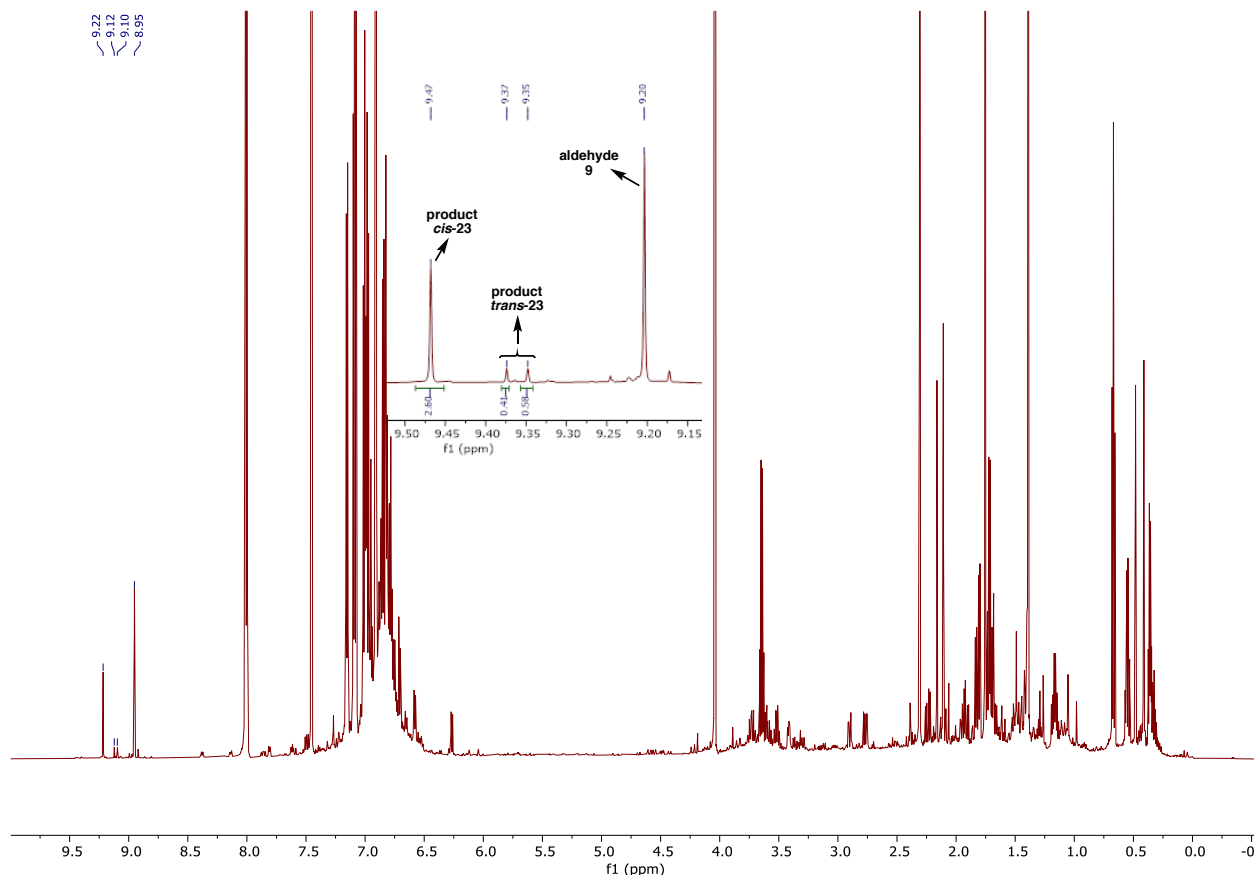

**Figure S4.** Crude reaction mixture of the photochemical alkylation of aldehyde *cis*-22

#### *nOe* experiments on *cis*-23

The *cis* stereochemistry of the substituents on the cyclopropane ring was assigned based *nOe* experiments on pure *cis*-23. Selective excitation  $^1\text{H}$  NMR spectra were recorded on a Varian Mercury 400 in  $\text{C}_6\text{D}_6$  (Figure S5).

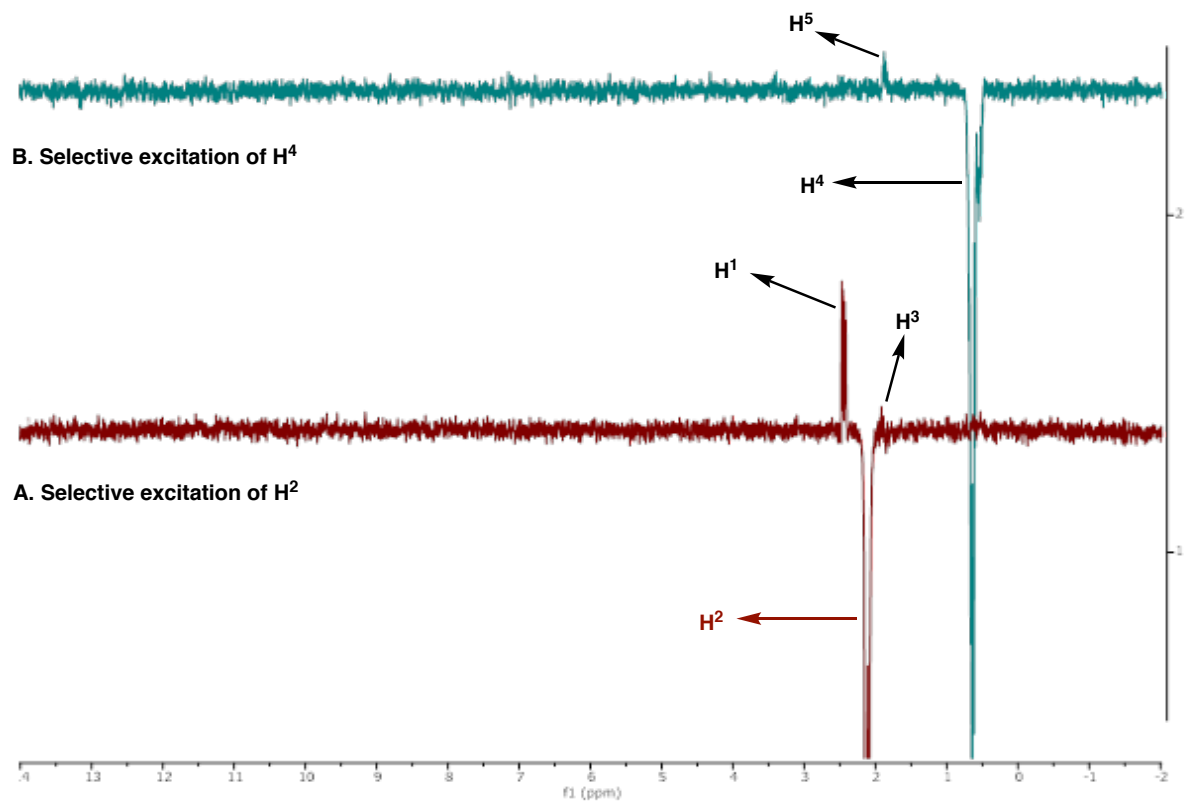

**Figure S5. Selective excitation experiments of H<sup>2</sup> and H<sup>4</sup> on *cis*-23**

A. Selective excitation of H<sup>2</sup> shows a nOe interaction with H<sup>1</sup> and H<sup>3</sup>.

B. Selective excitation of H<sup>4</sup> shows a nOe interaction with H<sup>5</sup>.

*cis*-23 was assigned the indicated relative stereochemistry based on the key nOe interaction between H<sup>4</sup>–H<sup>5</sup>, as shown in Figure S6.

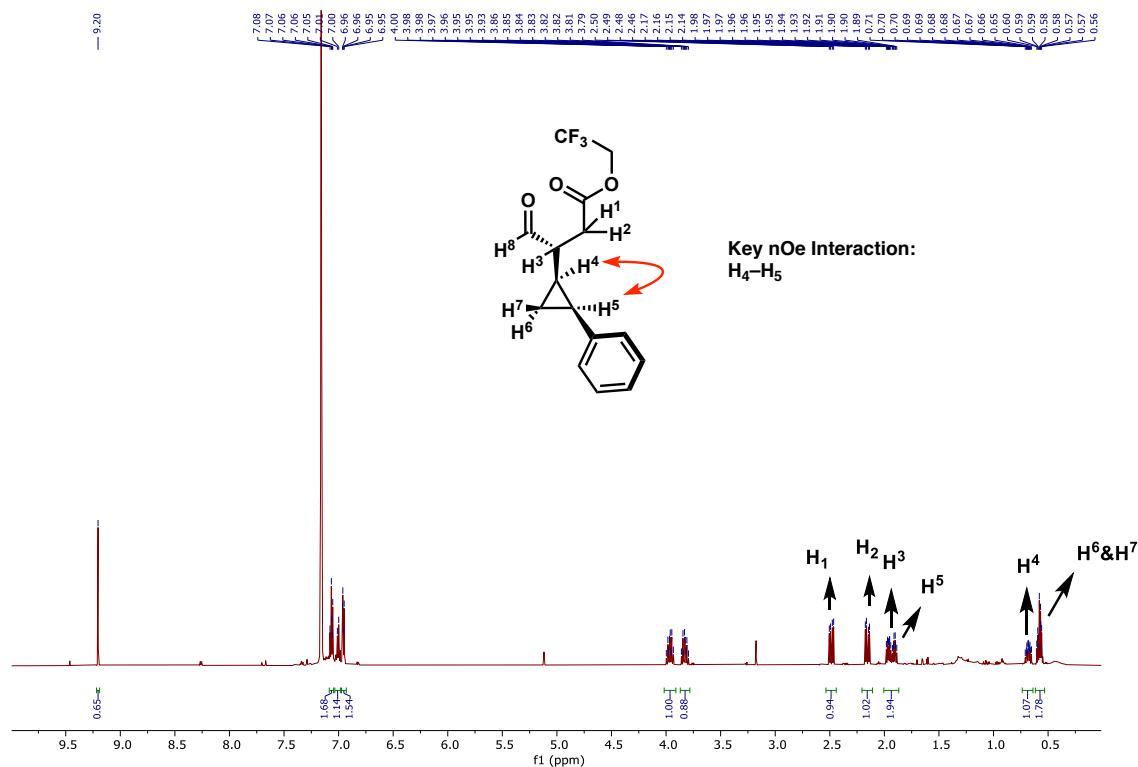

**Figure S6.** <sup>1</sup>H MNR spectrum of *cis-23*

Our interpretation of the radical probe experiments is summarized in Figure S7. Radical probe *trans-22* exclusively formed the alkylation product *trans-23* as a 1.3:1 mixture of diastereomers at C1, which is consistent with either a radical chain or in-cage radical recombination. With radical probe *cis-22*, the expectation was that an in-cage radical process would exclusively furnish the thermodynamically stable alkylation product *trans-23* via acyclic intermediate **27**. Alternatively, the alkylation product *cis-23* would form exclusively if the reaction proceeded through a radical chain. Surprisingly, starting from radical probe *cis-22*, we isolated both *trans* and *cis* isomers of alkylation product **24** in a 1:2.6 ratio. These observations suggest that the catalytic enantioselective reaction may proceed simultaneously through two mechanisms, which are both remarkably highly enantioselective. The existence of two distinct mechanistic pathways is also consistent with the measured quantum yield of 4.

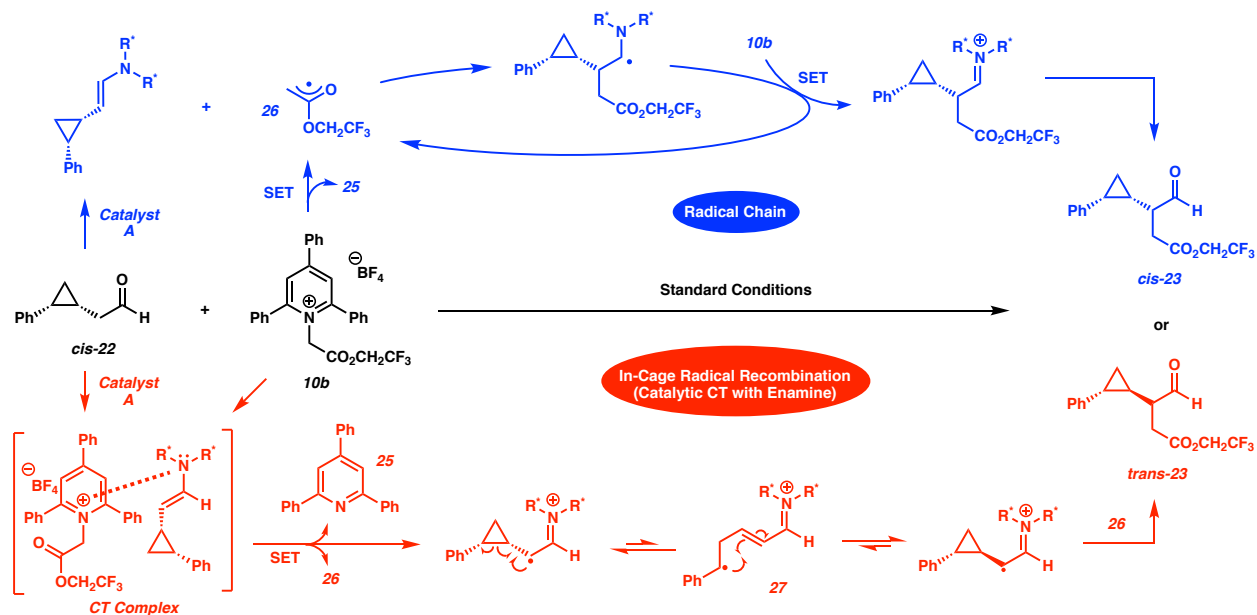

**Figure S7. Interpretation of Radical Probe Experiments**

### E. Stability of Pyridinium Salt with Sodium Iodide

To test for the possibility of *in situ* generation of an  $\alpha$ -iodoester species from the starting pyridinium salts, these salts were subjected to NaI conditions in the presence of various amounts of light. The starting pyridinium salt **10b** was dissolved in DMA and treated with NaI and water, according to the proportions found in general procedure C at a 0.05 mmol scale. Me<sub>3</sub>SiPh was added as an internal standard. Three separate samples were prepared and stirred for 1 h before an aliquot was taken for <sup>1</sup>H analysis. The three samples were stirred in the presence of different amounts of light as follows: the first was wrapped in aluminum foil (no light), the second was left stirring in a clear vial (ambient fume hood lighting), and the final sample was subjected to 390 nm light at 0 °C, as in the reaction conditions. After 1 h, all three samples showed no decomposition of starting material in reference to the internal standard.

### F. Reaction with TEMPO

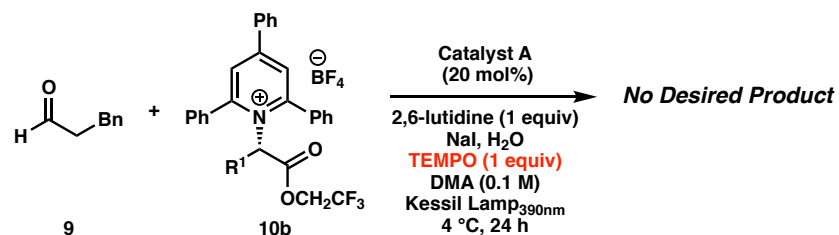

The reaction was performed following the general procedure C with 1 equiv TEMPO.

## 7. Synthesis of (-)-Enterolactone and (-)-Enterodiol

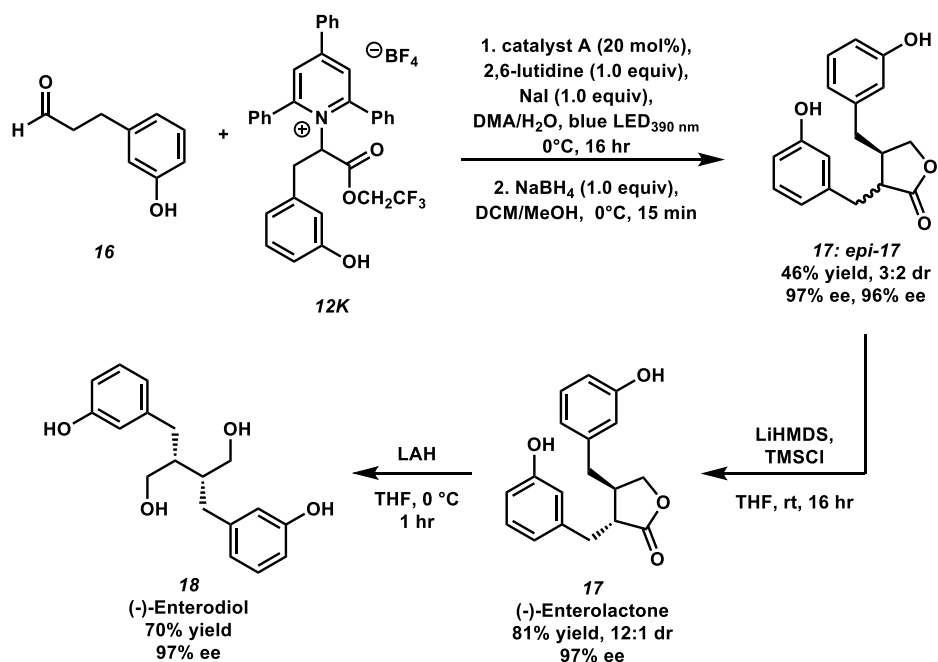

### (-)-Enterolactone, 17:

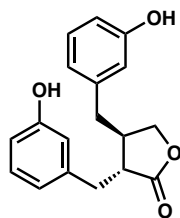

**17** was synthesized by a two-reaction sequence. First, the general procedures C and E were carried out at 0.147 mmol scale using 3-(3-hydroxyphenyl)propanal<sup>8</sup> and purified by silica gel column chromatography using hexanes/EtOAc (3:2) as eluent (20.1 mg, 46% yield, 3:2 dr, 97%/96% ee). The inseparable mixture of diastereomers (6.8 mg, 0.0228 mmol) was dissolved in THF (750  $\mu$ L) before LiHMDS (1.0 M in THF, 228  $\mu$ L, 0.228 mmol) and TMSCl (15  $\mu$ L, 0.114 mmol) were added at 0 °C. The reaction was allowed to warm to 23 °C and stirred. After 16 h, 3M aqueous HCl (0.5 mL) was added dropwise, and the reaction was stirred for 30 additional min before adding H<sub>2</sub>O and extracting with CH<sub>2</sub>Cl<sub>2</sub> (x2). The combined organic layers were dried over Na<sub>2</sub>SO<sub>4</sub> and concentrated under reduced pressure. The product was purified by preparatory thin layer chromatography using hexanes/EtOAc (3:2) as eluent. (-)-Enterolactone **17** was obtained as a



colorless oil (5.5 mg, 81% yield, 12:1 dr, 97% ee): HPLC conditions: Chiralcel OD-H column (25 cm  $\times$  0.46 cm ID), hexanes/IPA = 75:25, 0.5 mL/min, 220 nm UV detector: tR = 22.95 min (major), tR = 28.18 min (minor) tR= 36.52 min (minor), 42.21 min (major).  $[\alpha]_D^{26} = -36.4^\circ$  (c = 0.20, MeOH).  $^1\text{H NMR}$  (600 MHz, acetone- $d_6$ )  $\delta$  8.33 (s, 2H), 7.13 (t,  $J = 7.8$  Hz, 1H), 7.09 (t,  $J = 7.8$  Hz, 1H), 6.80 – 6.77 (m, 1H), 6.75 – 6.65 (m, 3H), 6.64 (t,  $J = 2.1$  Hz, 1H), 6.60 (d,  $J = 7.6$  Hz, 1H), 4.03 (dd,  $J = 8.9, 7.4$  Hz, 1H), 3.88 (t,  $J = 8.8$  Hz, 1H), 2.96 (dd,  $J = 13.8, 5.4$  Hz, 1H), 2.91 – 2.86 (m, 1H), 2.71 – 2.64 (m, 2H), 2.57 – 2.48 (m, 2H).  $^{13}\text{C NMR}$  (600 MHz, acetone- $d_6$ )  $\delta$  177.84, 157.57, 157.55, 140.47, 139.95, 129.51, 129.42, 120.57, 119.70, 116.23, 115.54, 113.56, 113.35, 70.60, 45.90, 41.28, 37.79, 34.40. **HRMS (ESI)** calculated for  $[\text{C}_{18}\text{H}_{18}\text{O}_4, \text{M} + \text{Na}]^+$ : 321.1097, Found 321.1122.

**(-)-Enterodiol, 18:**

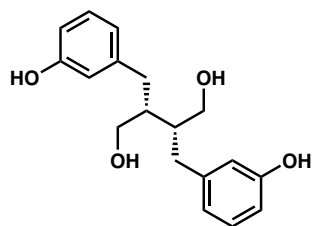

**17** (enterolactone) (4.2 mg, 12:1 dr, 0.0141 mmol) was dissolved in THF (1 mL), cooled to 0 °C, and treated with  $\text{LiAlH}_4$  (3.0 mg, 0.07 mmol). After 1 h, the reaction was quenched according to the Fieser workup method by the sequential addition of 10  $\mu\text{L}$   $\text{H}_2\text{O}$ , 10  $\mu\text{L}$  15% aqueous NaOH, and 30  $\mu\text{L}$   $\text{H}_2\text{O}$ . The mixture was dried over  $\text{MgSO}_4$  and passed through celite plug and concentrated under reduced pressure. The product was purified by preparatory thin layer chromatography using hexanes/EtOAc (1:3) as eluent to yield a single diastereomer of (-)-enterodiol **18**, which was obtained as a colorless oil (3.0 mg, 70% yield, 97% ee): HPLC conditions: Chiralpak IC column (25 cm  $\times$  0.46 cm ID), hexanes/IPA = 75:25, 0.7 mL/min, 280 nm UV detector, tR = 6.31 min (major) and tR= 7.46 min (minor).  $[\alpha]_D^{26} = -11.0$  (c = 0.10, MeOH).  $^1\text{H NMR}$  (600 MHz,  $\text{CD}_3\text{OD}$ )  $\delta$  7.08 – 7.05 (m, 2H), 6.65 – 6.58 (m, 6H), 3.63 (dd,  $J = 11.1, 4.0$  Hz, 2H), 3.54 (dd,  $J = 11.1, 5.2$  Hz, 2H), 2.66 (t,  $J = 7.7$  Hz, 4H), 2.01 (m, 2H).  $^{13}\text{C NMR}$  (600 MHz, acetone- $d_6$ )  $\delta$  157.29, 143.17, 129.02, 120.23, 115.98, 112.59, 60.08, 44.01, 35.28. **HRMS (ESI)** calculated for  $[\text{C}_{18}\text{H}_{22}\text{O}_4, \text{M} + \text{Na}]^+$ : 325.1410, Found 325.1436.

## 8. References

1. James, M. J.; Strieth-Kalthoff, F.; Sandfort, F.; Klauck, F. J. R.; Wagener, F.; Glorius, F. Visible-Light-Mediated Charge Transfer Enables C–C Bond Formation with Traceless Acceptor Groups. *Chem. Eur. J.* **2019**, *25*, 8240-8244.
2. Zhang, C.-S.; Bao, L.; Chen, K.-Q.; Wang, Z.-W.; Chen, X.-Y. Photoinduced  $\alpha$ -Alkenylation of Katritzky Salts: Synthesis of  $\beta,\gamma$ -Unsaturated Esters. *Org. Lett.* **2021**, *23*, 5, 1577-1581.
3. Sugimoto, K.; Yamamoto, N.; Tominaga, D.; Matsuya, Y. Three-Component Domino Process for the Pyrrolizine Skeleton via [3 + 2]-Cycloaddition–Enamine Cyclization Triggered by a Gold Catalyst. *Org. Lett.* **2015**, *17*, 5, 1320-1323.
4. (a) Basch, C. H.; Liao, J. N.; Xu, J. Y.; Piane, J. J.; Watson, M. P. Harnessing Alkyl Amines as Electrophiles for Nickel-Catalyzed Cross Couplings via C–N Bond Activation. *J. Am. Chem. Soc.* **2017**, *139*, 5313-5316. (b) Wu, J.; He, L.; Noble, A.; Aggarwal, V. K. Photoinduced Deaminative Borylation of Alkylamines. *J. Am. Chem. Soc.* **2018**, *140*, 10700-1074. (c) Plunkett, S.; Basch, C. H.; Santana, S. O.; Watson, M. P. Harnessing Alkylpyridinium Salts as Electrophiles in Deaminative Alkyl–Alkyl Cross-Couplings. *J. Am. Chem. Soc.* **2019**, *141*, 2257-2262.
5. Cismesia, M. A.; Yoon, T. P. Characterizing chain processes in visible light photoredox catalysis. *Chem. Sci.* **2015**, *6*, 5426-5434.
6. Bahamonde, A.; Melchiorre, P. Mechanism of the Stereoselective  $\alpha$ -Alkylation of Aldehydes Driven by the Photochemical Activity of Enamines. *J. Am. Chem. Soc.* **2016**, *138*, 8019-8030.
7. Gualandi, A.; Marchini, M.; Mengozzi, L.; Natali, M.; Lucarini, M.; Ceroni, P.; Cozzi, P. G. Organocatalytic Enantioselective Alkylation of Aldehydes with [Fe(bpy)<sub>3</sub>]Br<sub>2</sub> Catalyst and Visible Light. *ACS Catal.* **2015**, *5*, 5927-5931.
8. Vassiliou, S.; Węglarz-Tomczak, E.; Berlicki, Ł.; Pawełczak, M.; Nocek, B.; Mulligan, R.; Joachimiak, A.; Mucha, A. Structure-Guided, Single-Point Modifications in the Phosphinic Dipeptide Structure Yield Highly Potent and Selective Inhibitors of Neutral Aminopeptidases. *J. Med. Chem.* **2014**, *57*, 19, 8140-8151.

## 9. NMR Spectra

### 1-(2-Ethoxy-2-oxoethyl)-2,4,6-triphenylpyridin-1-ium tetrafluoroborate, 10a:

$^1\text{H}$  NMR (600 MHz,  $\text{CDCl}_3$ )

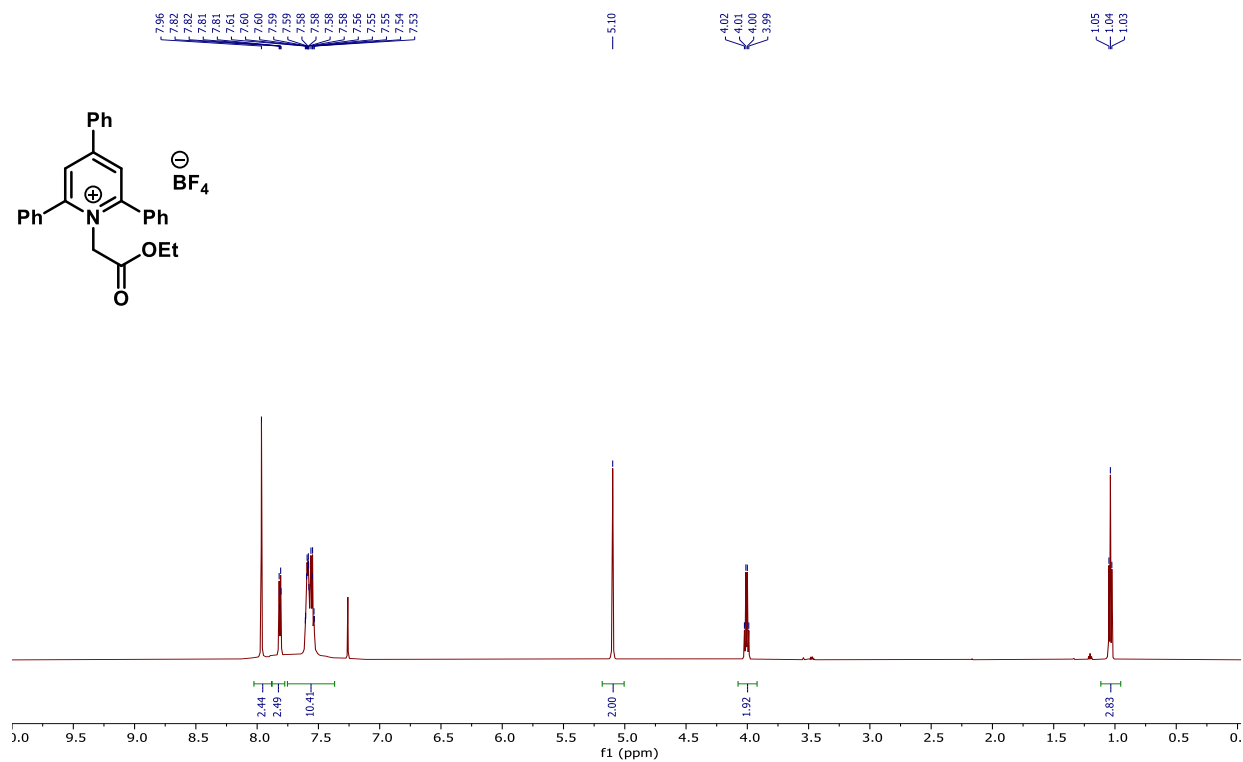

$^{13}\text{C}$  NMR (151 MHz,  $\text{CDCl}_3$ )

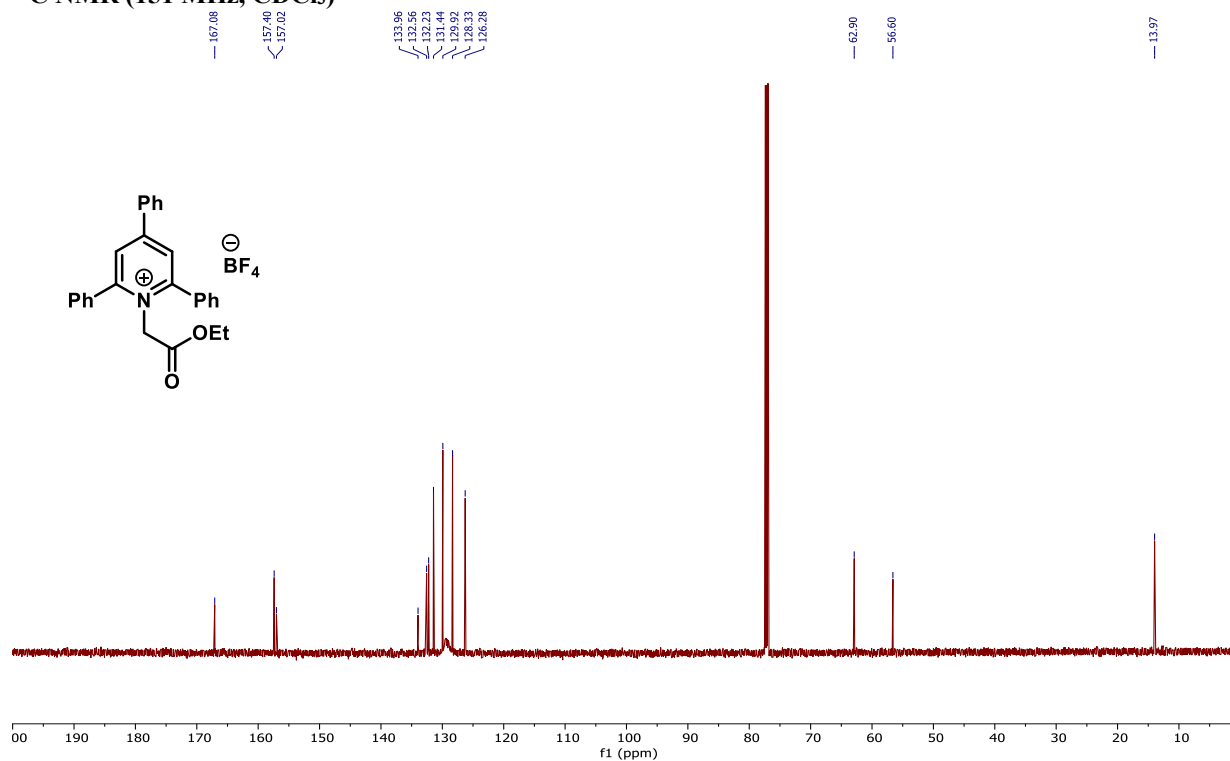

1-(2-oxo-2-(2,2,2-Trifluoroethoxy)ethyl)-2,4,6-triphenylpyridin-1-ium tetrafluoroborate, 10b:

<sup>1</sup>H NMR (600 MHz, CDCl<sub>3</sub>)

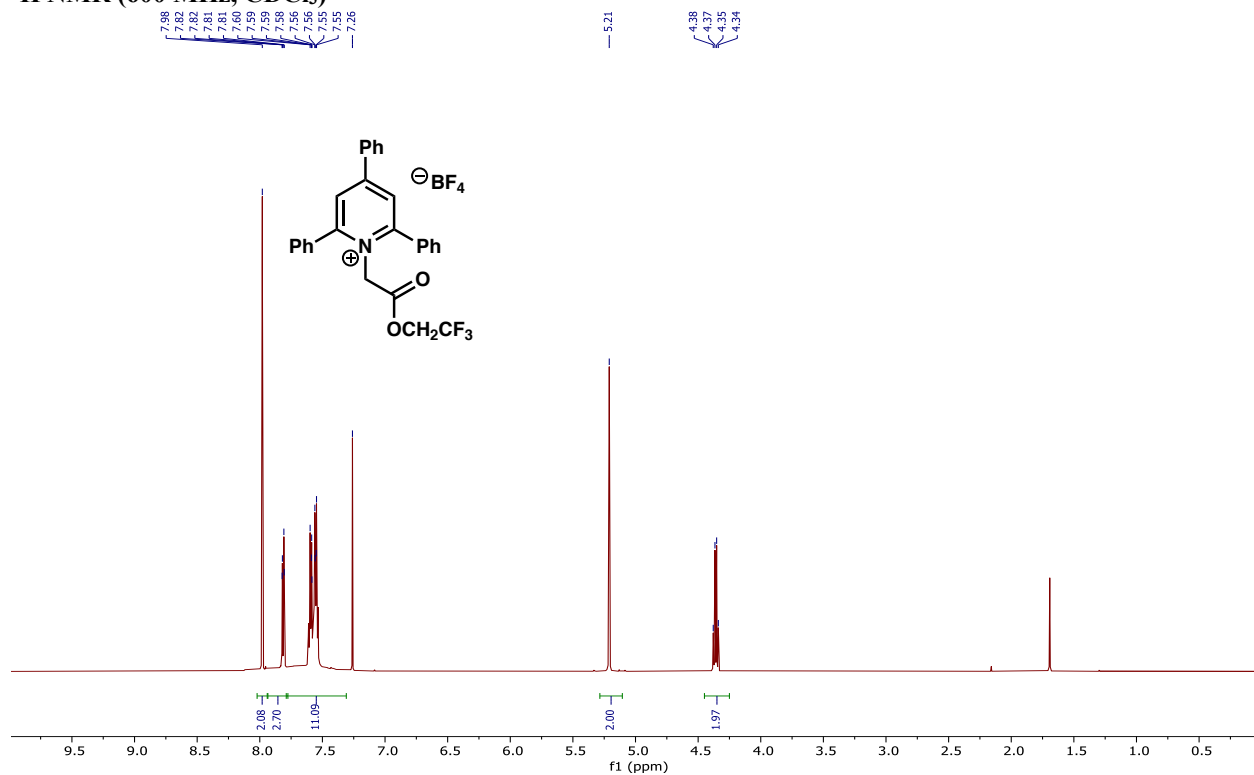

<sup>13</sup>C NMR (151 MHz, CDCl<sub>3</sub>)

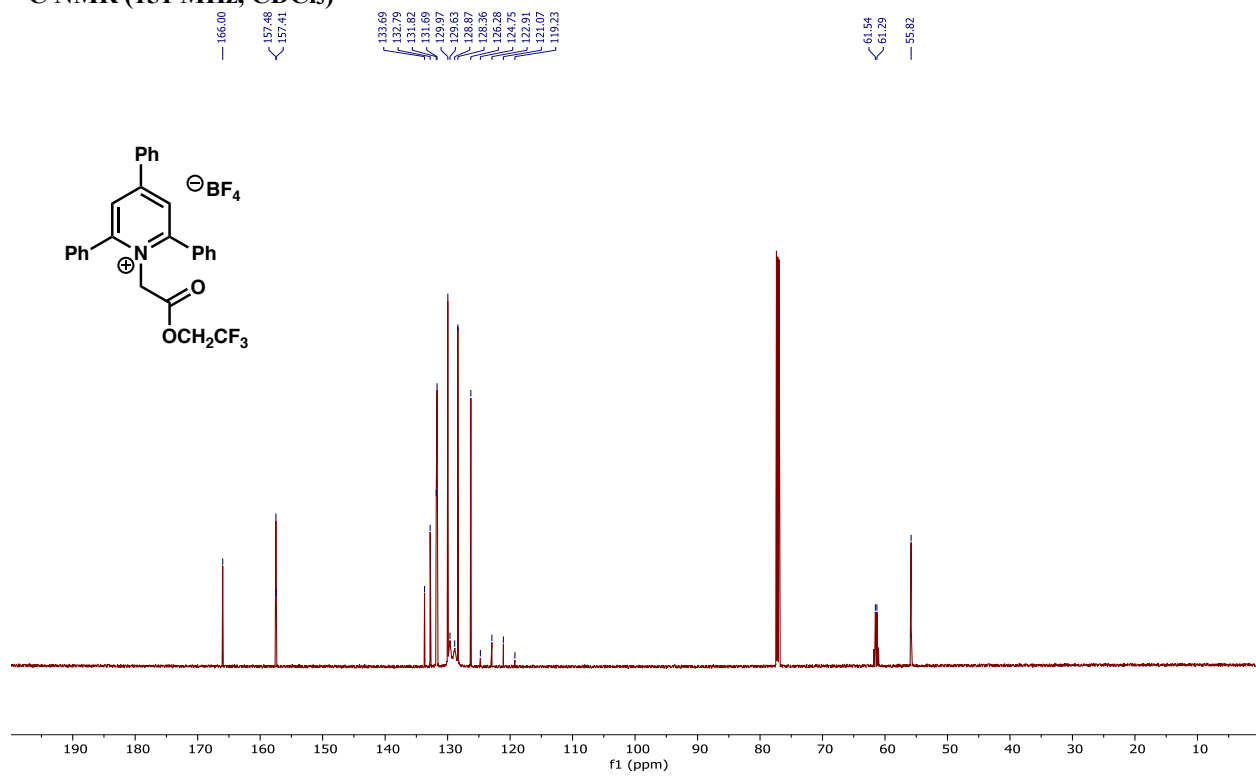

$^{19}\text{F}$  NMR (565 MHz,  $\text{CDCl}_3$ )

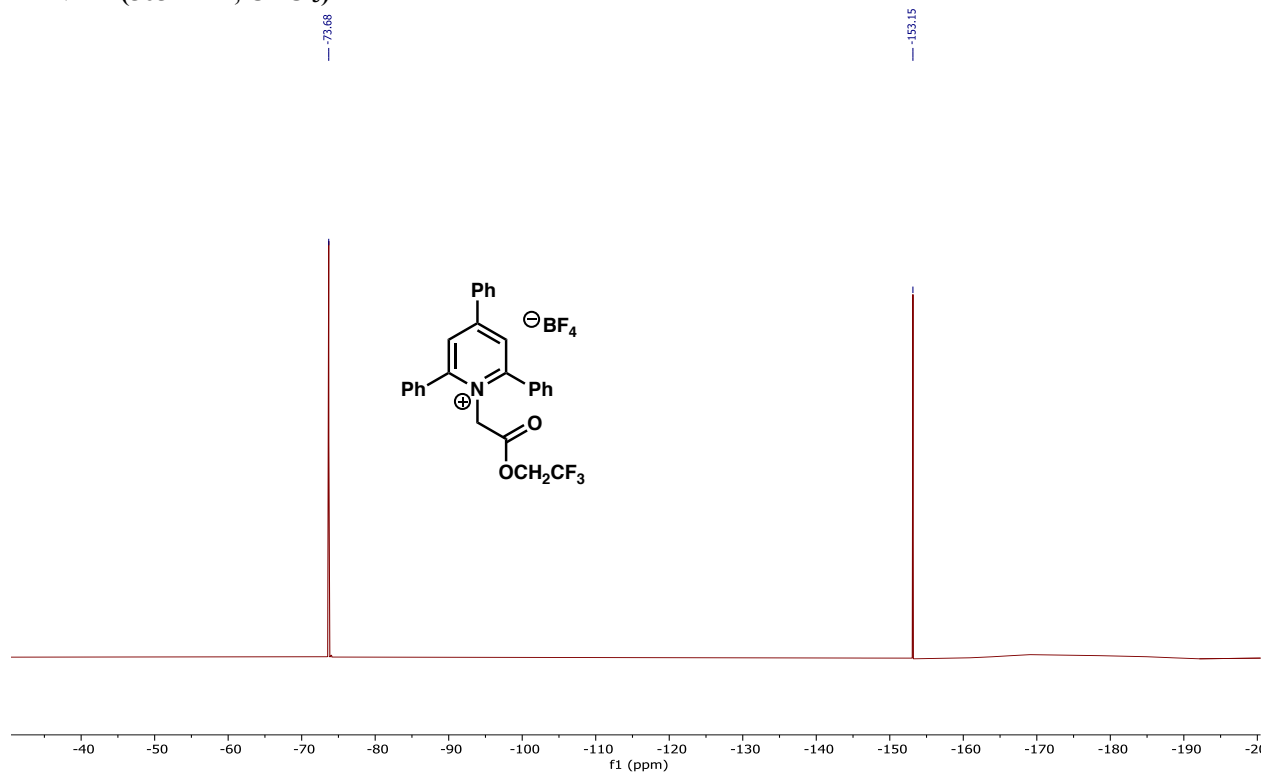

(*S*)-1-(1-oxo-1-(2,2,2-Trifluoroethoxy)propan-2-yl)-2,4,6-triphenylpyridin-1-ium tetrafluoroborate, (*S*)-12f:

$^1\text{H}$  NMR (600 MHz,  $\text{CDCl}_3$ )

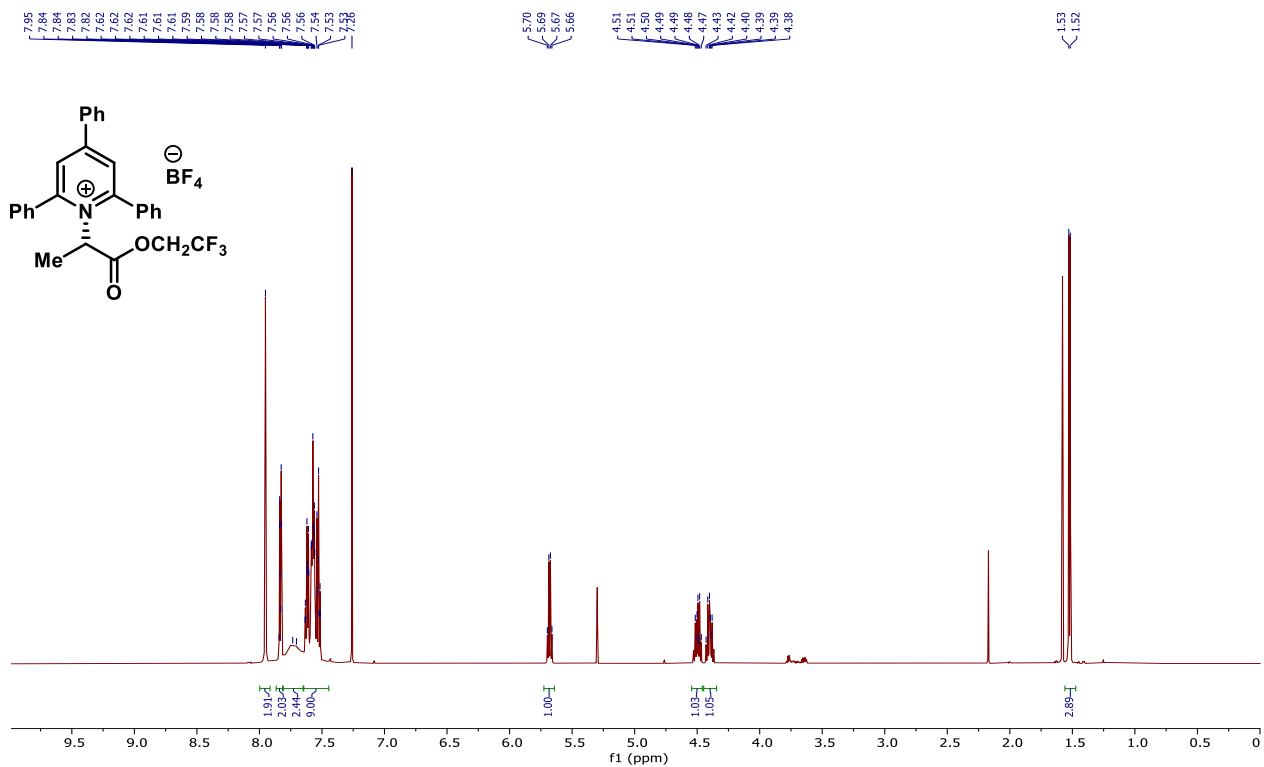

<sup>13</sup>C NMR (151 MHz, CDCl<sub>3</sub>)

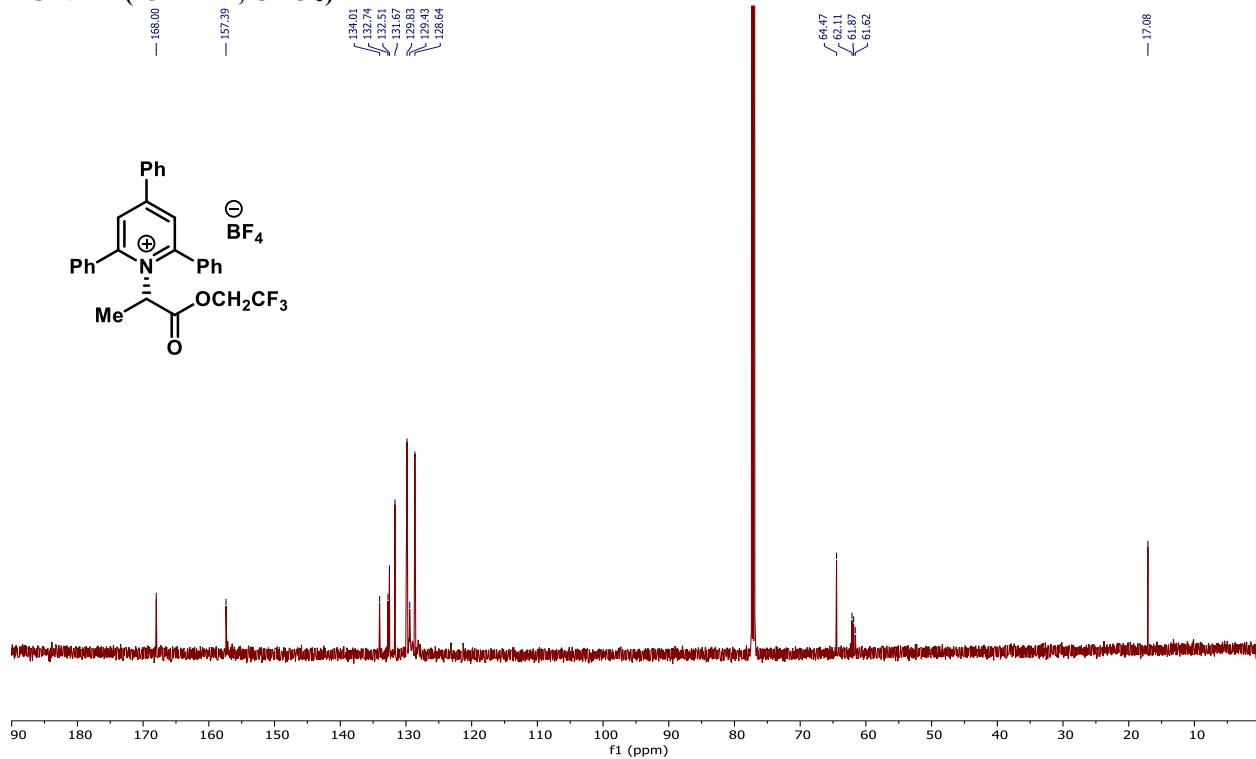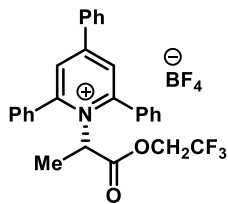

<sup>19</sup>F NMR (565 MHz, CDCl<sub>3</sub>)

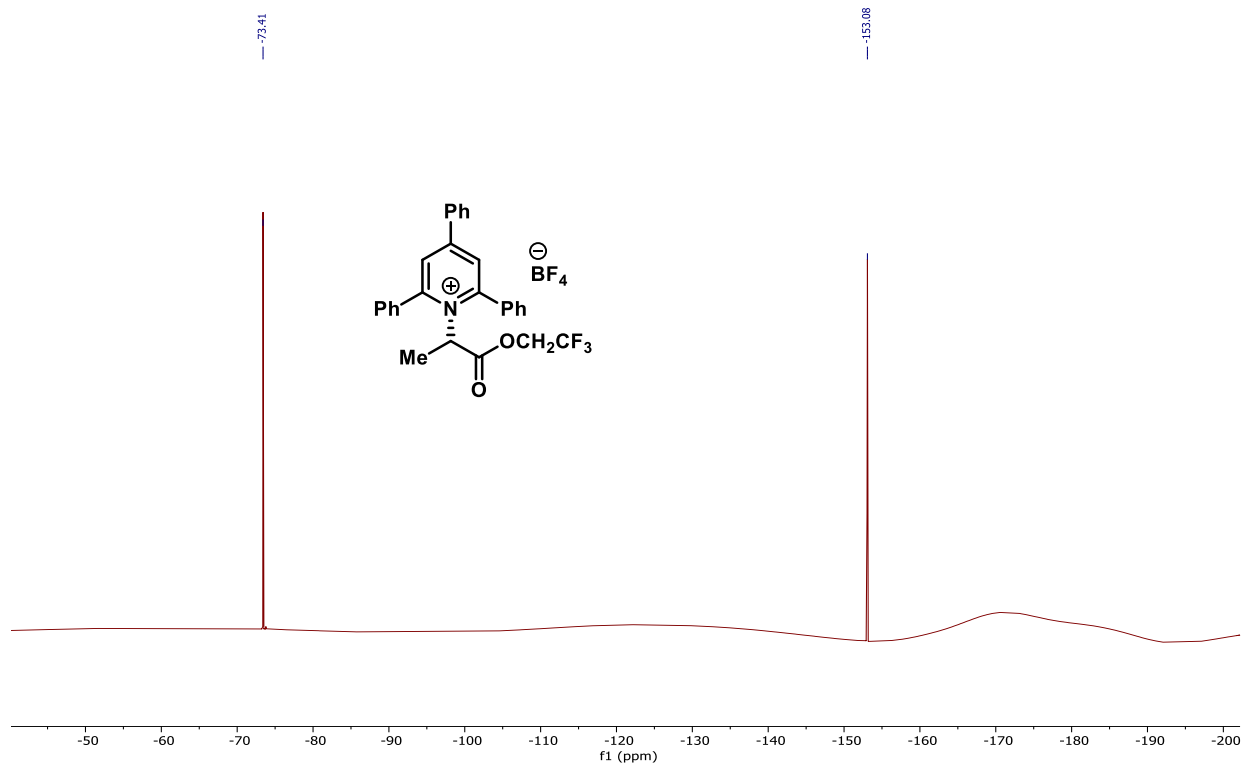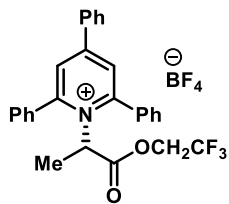

**(R)-1-(1-oxo-1-(2,2,2-Trifluoroethoxy)propan-2-yl)-2,4,6-triphenylpyridin-1-ium tetrafluoroborate, (R)-12f:**  
**<sup>1</sup>H NMR (600 MHz, CDCl<sub>3</sub>)**

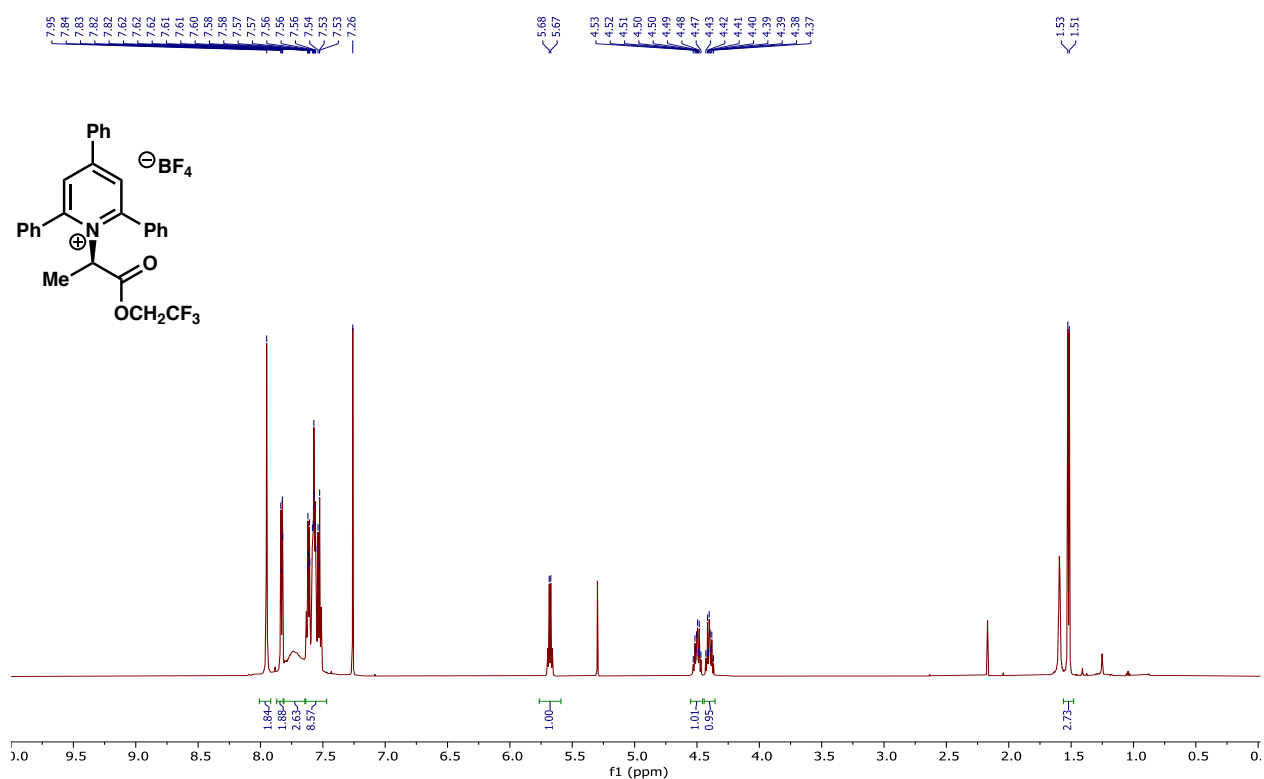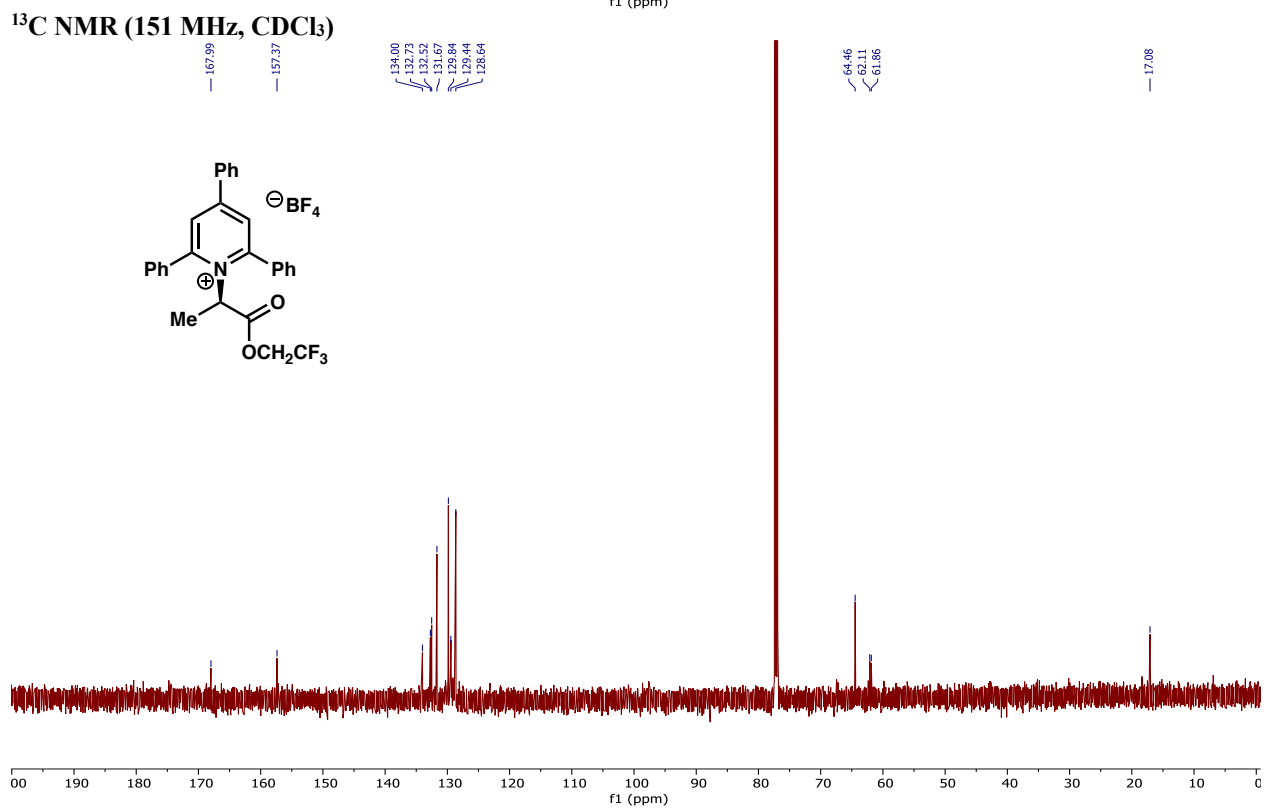

$^{19}\text{F}$  NMR (565 MHz,  $\text{CDCl}_3$ )

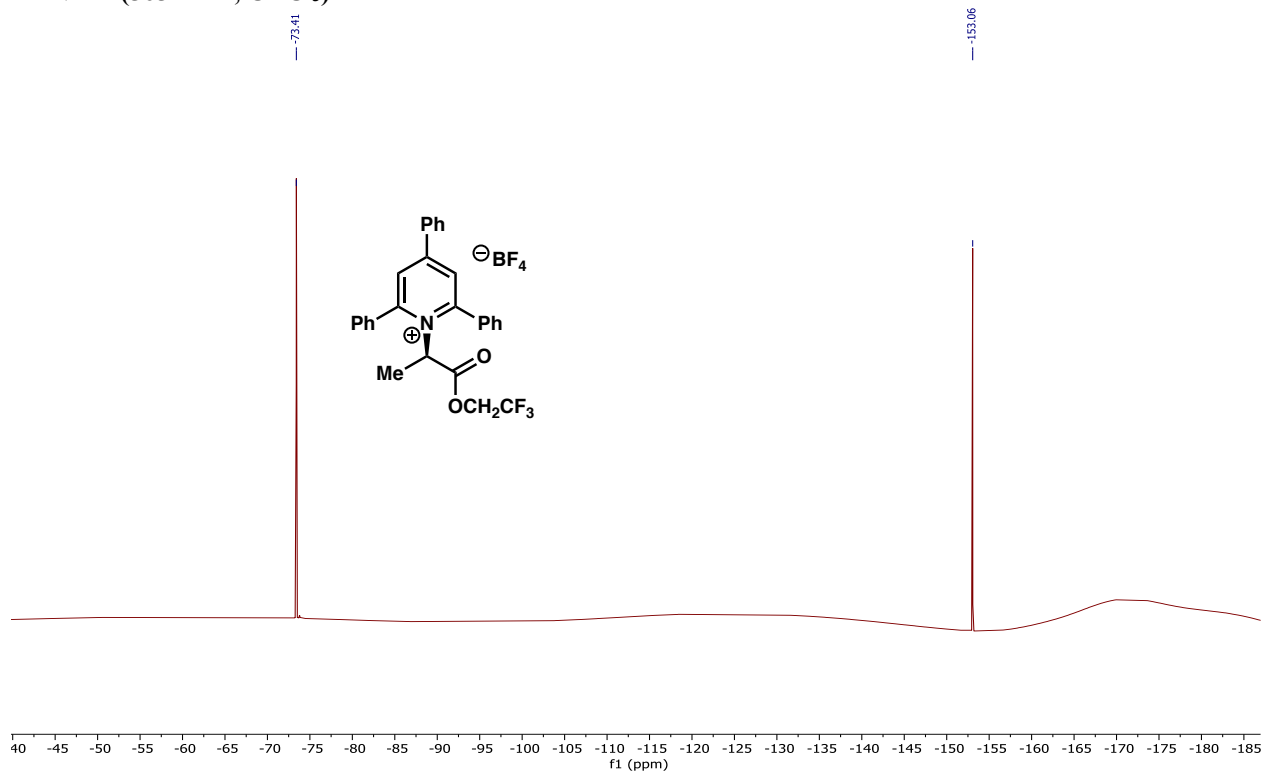

**(S)-1-(3-Methyl-1-oxo-1-(2,2,2-trifluoroethoxy)butan-2-yl)-2,4,6-triphenylpyridin-1-ium tetrafluoroborate, (S)-12g:**  
 $^1\text{H}$  NMR (600 MHz,  $\text{CDCl}_3$ )

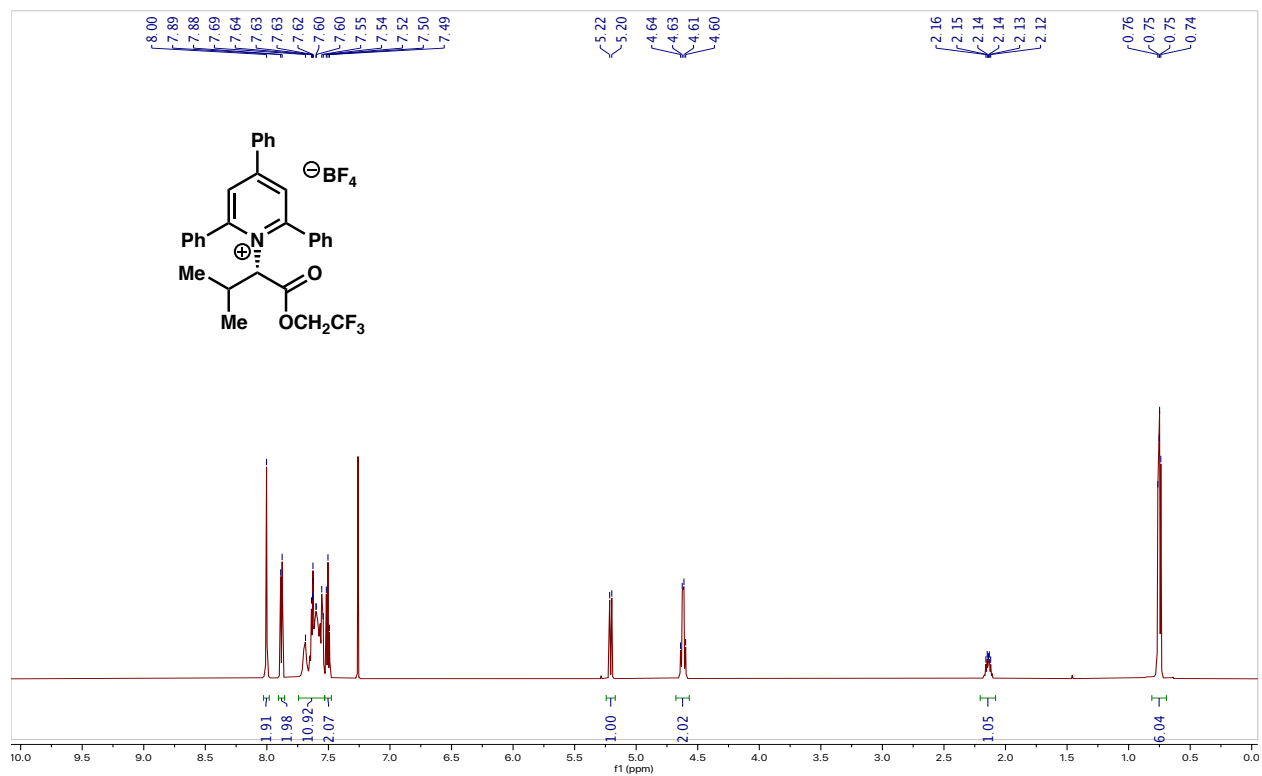



**<sup>13</sup>C NMR (151 MHz, CDCl<sub>3</sub>)**

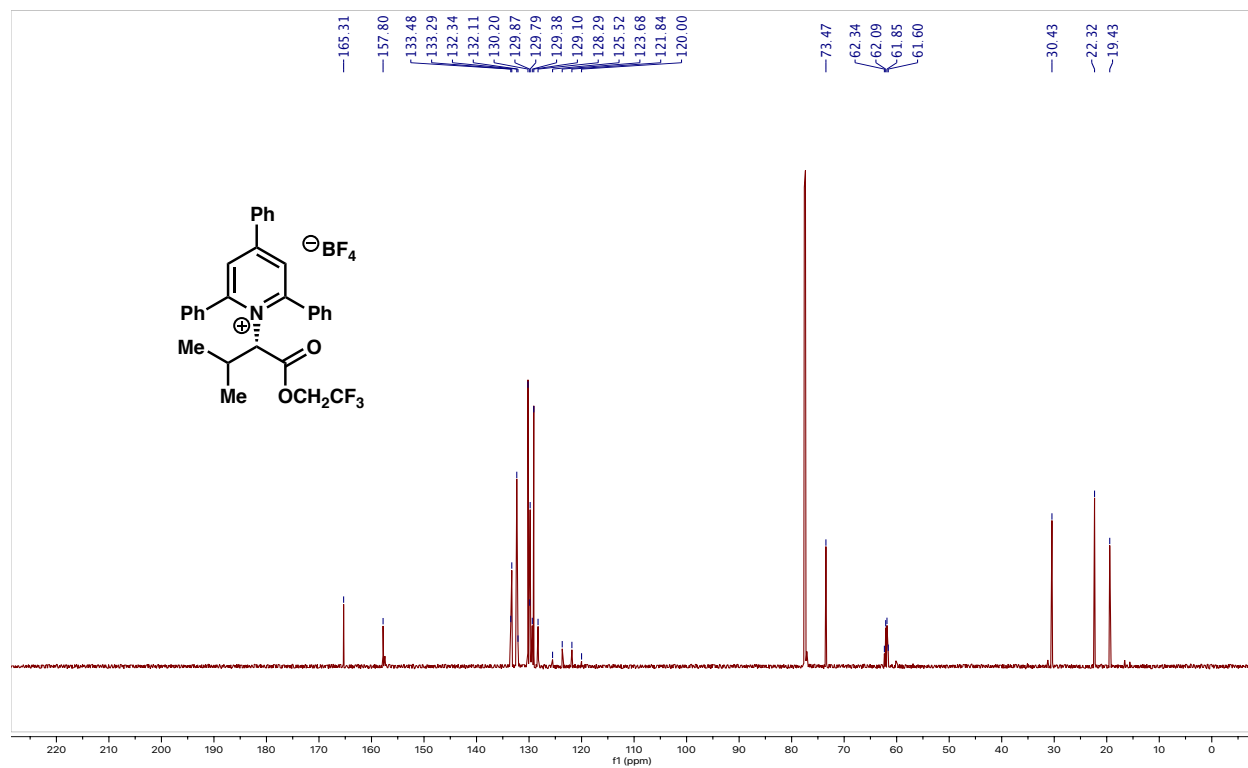

**<sup>19</sup>F NMR (565 MHz, CDCl<sub>3</sub>)**

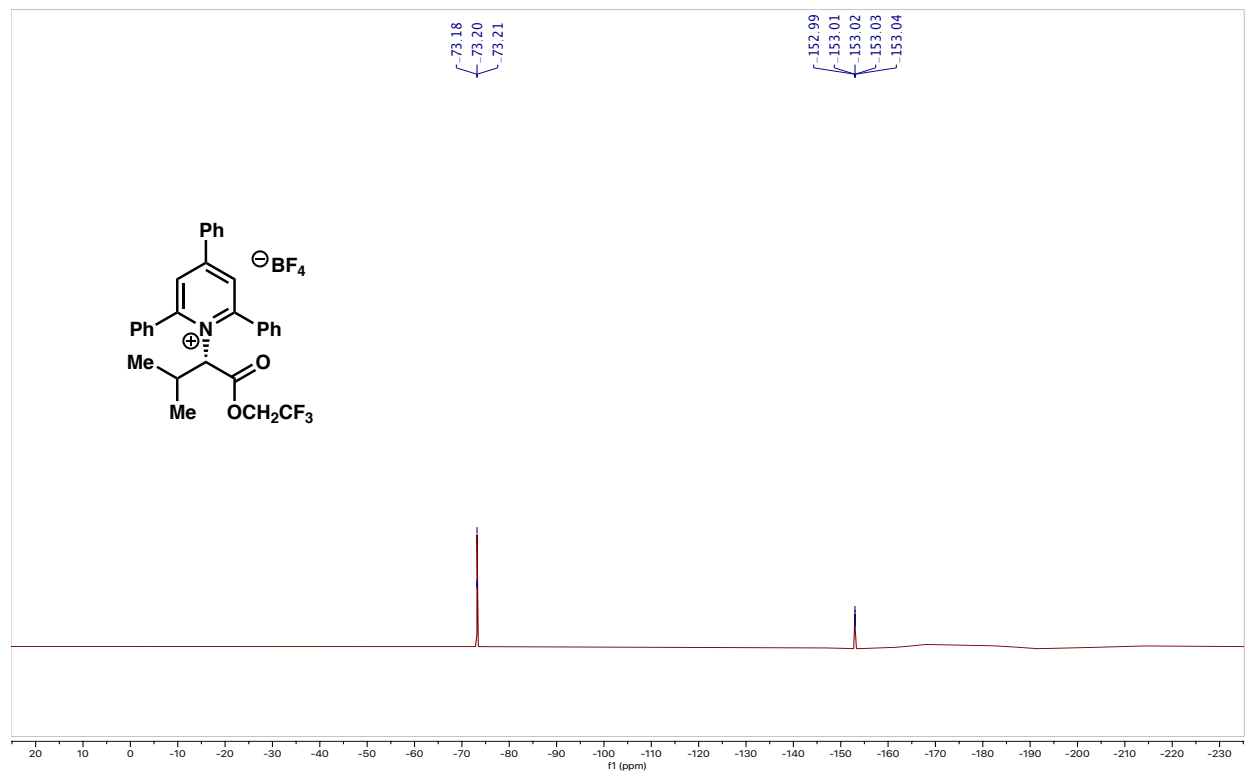

**(S)-1-(1-oxo-3-Phenyl-1-(2,2,2-trifluoroethoxy)propan-2-yl)-2,4,6-triphenylpyridin-1-ium, (S)-12h:**  
<sup>1</sup>H NMR (600 MHz, CDCl<sub>3</sub>)

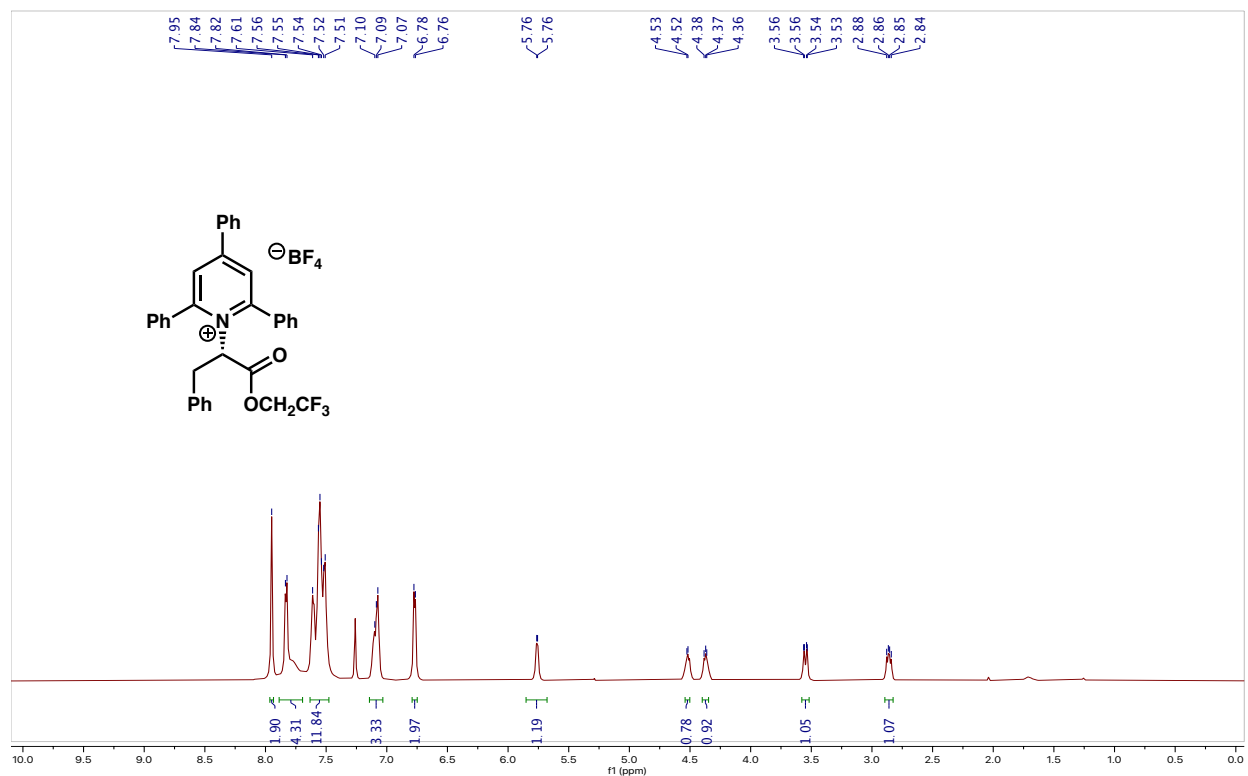

<sup>13</sup>C NMR (151 MHz, CDCl<sub>3</sub>)

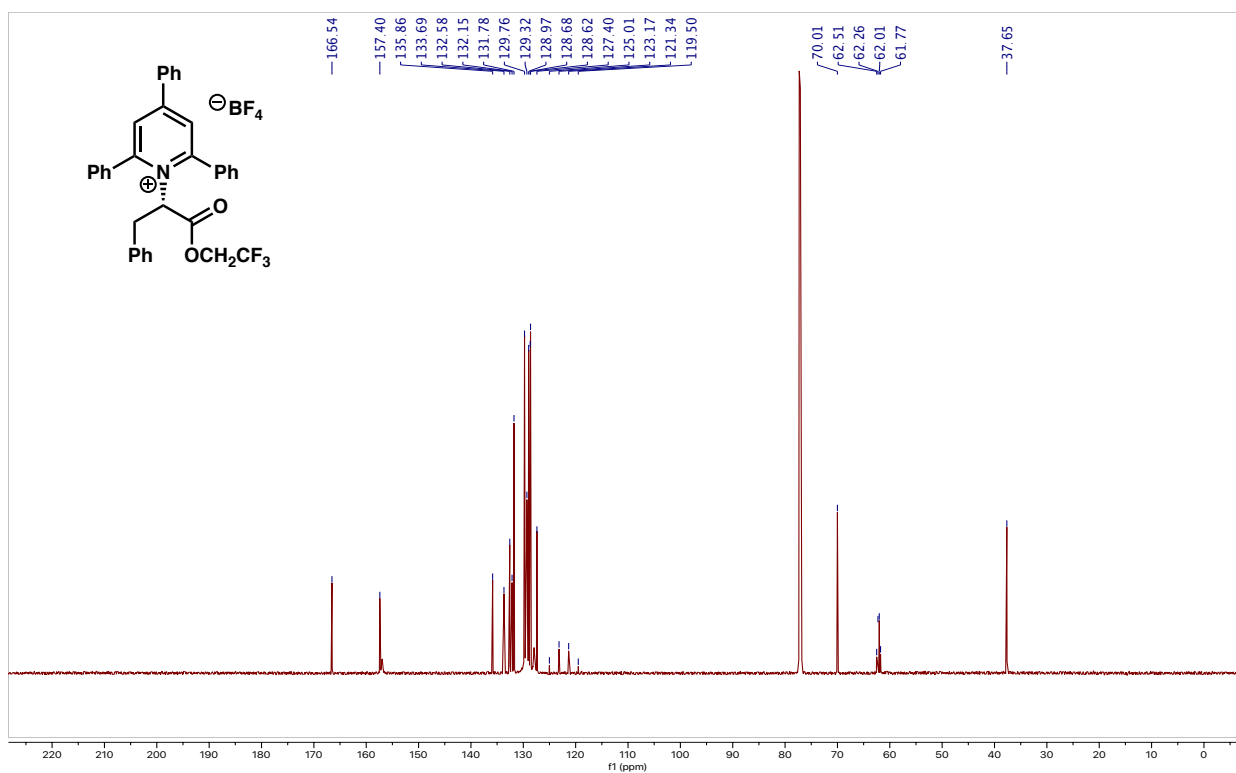

**<sup>19</sup>F NMR (565 MHz, CDCl<sub>3</sub>)**

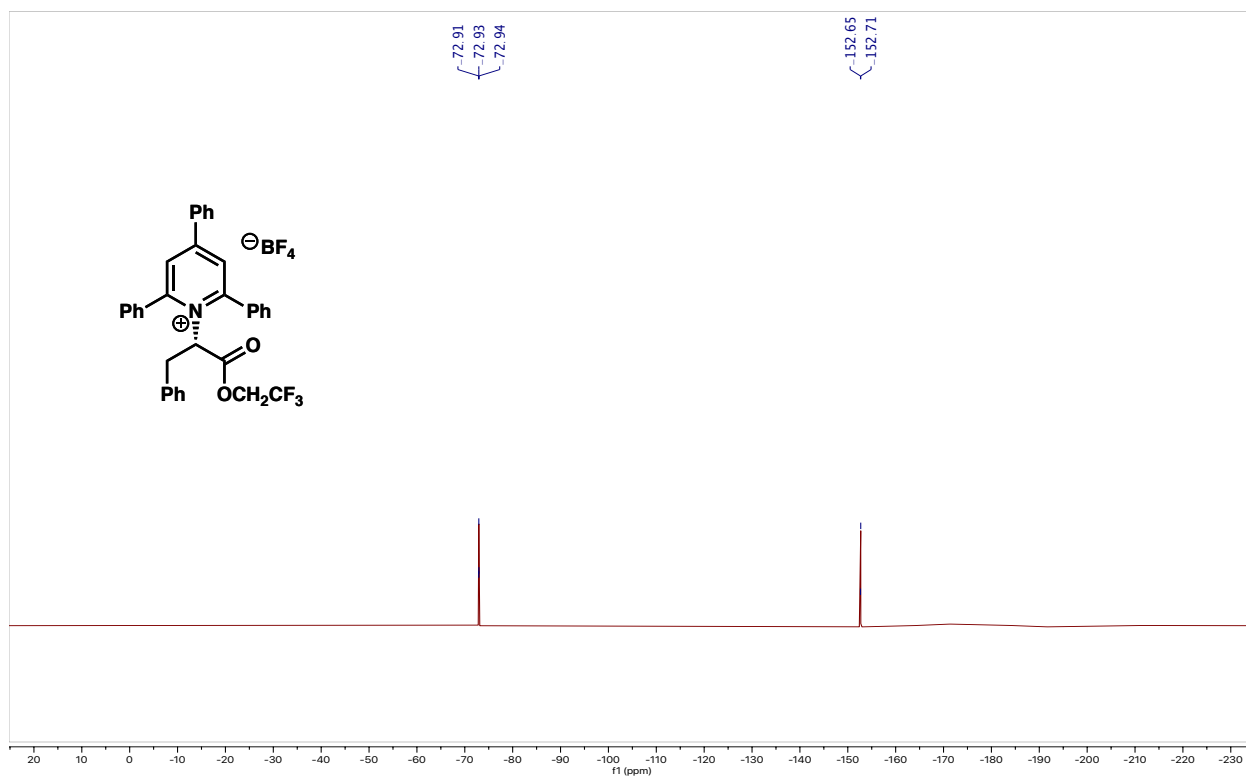

**(S)-1-(4-(Methylthio)-1-oxo-1-(2,2,2-trifluoroethoxy)butan-2-yl)-2,4,6-triphenylpyridin-1-ium, (S)-12i:**

**<sup>1</sup>H NMR (600 MHz, CDCl<sub>3</sub>)**

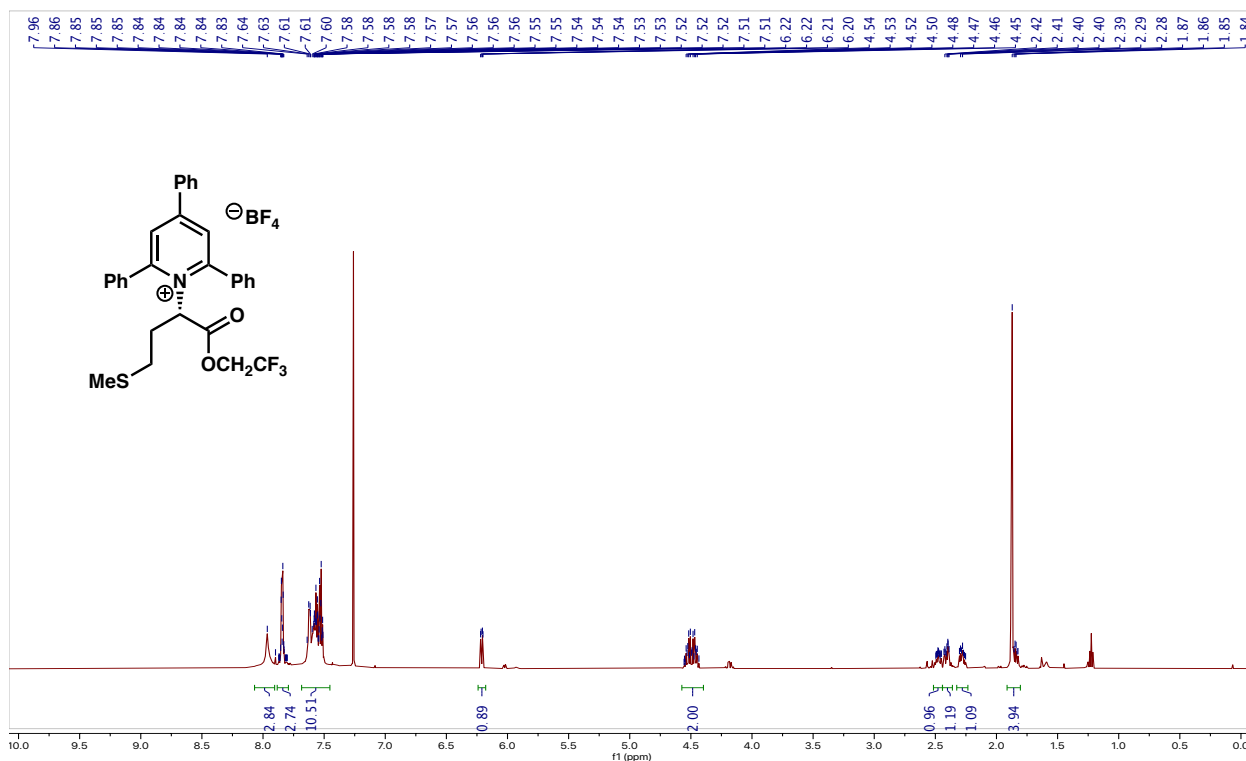

**<sup>13</sup>C NMR (151 MHz, CDCl<sub>3</sub>)**

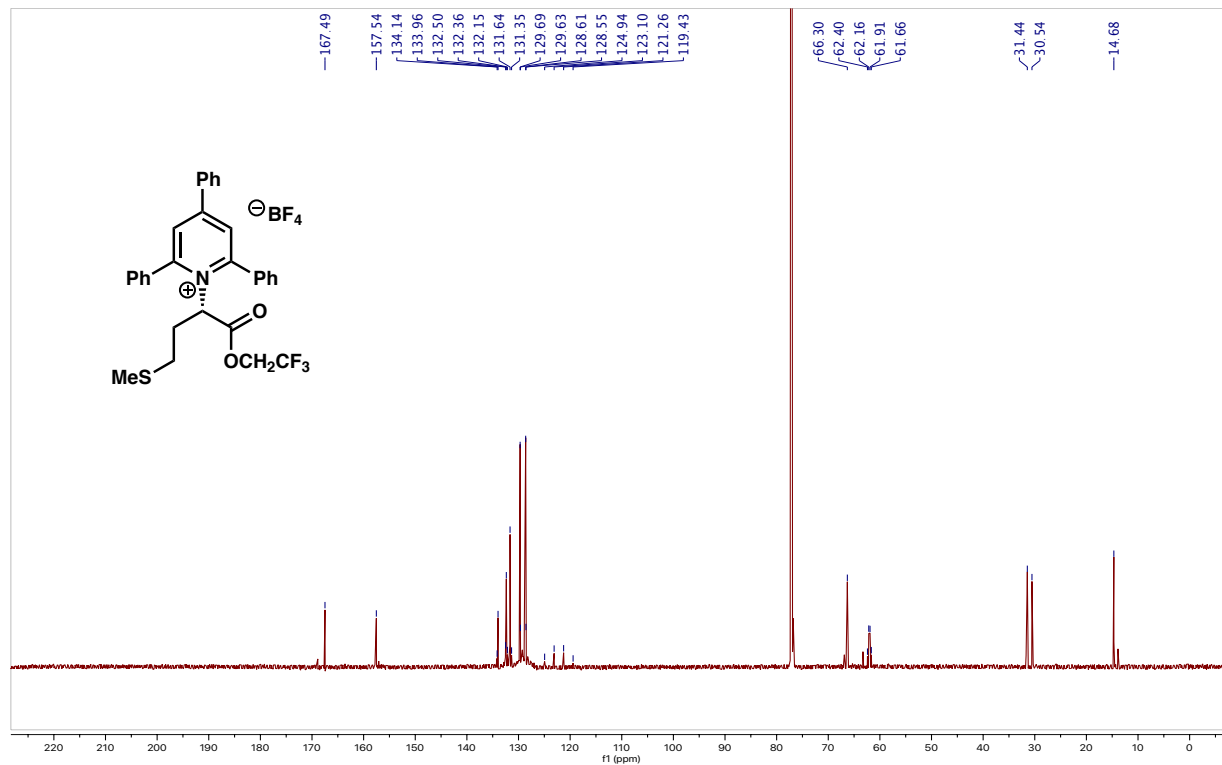

**<sup>19</sup>F NMR (565 MHz, CDCl<sub>3</sub>)**

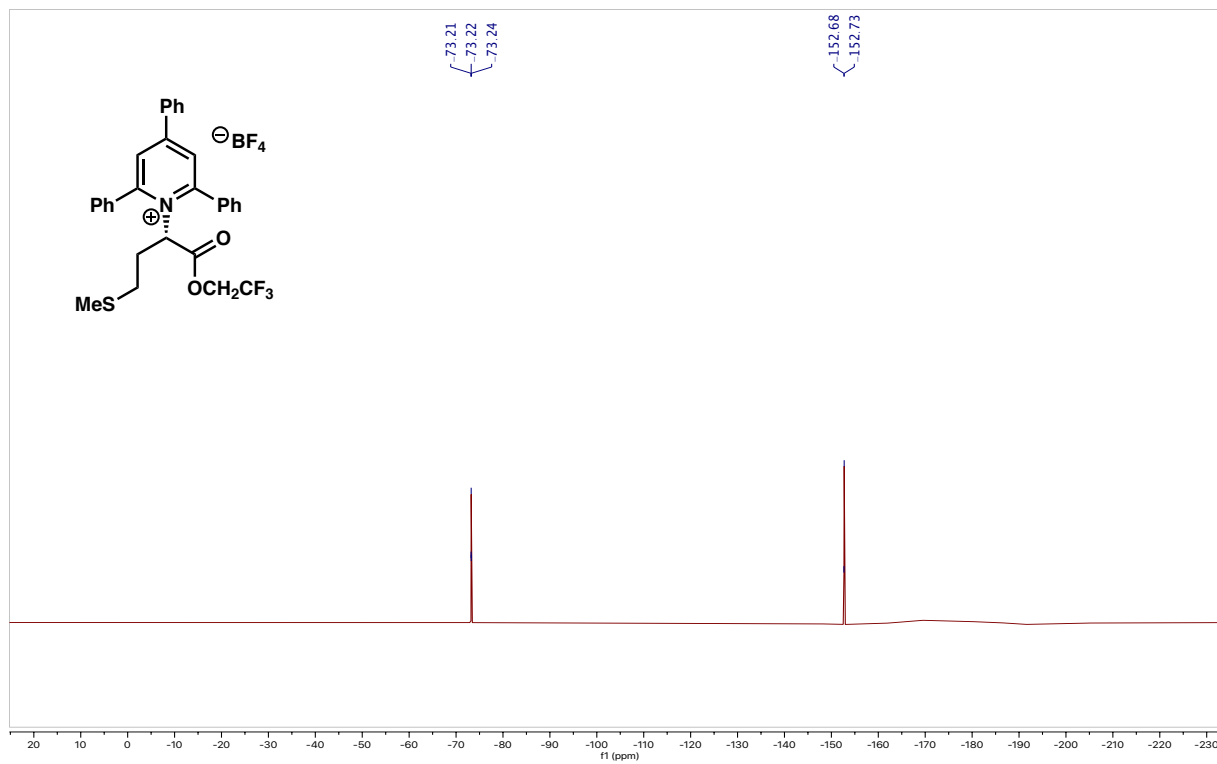

**(S)-1-(3-(4-Hydroxyphenyl)-1-oxo-1-(2,2,2-trifluoroethoxy)propan-2-yl)-2,4,6-triphenylpyridin-1-ium tetrafluoroborate, (S)-12j:**

**<sup>1</sup>H NMR (600 MHz, CDCl<sub>3</sub>)**

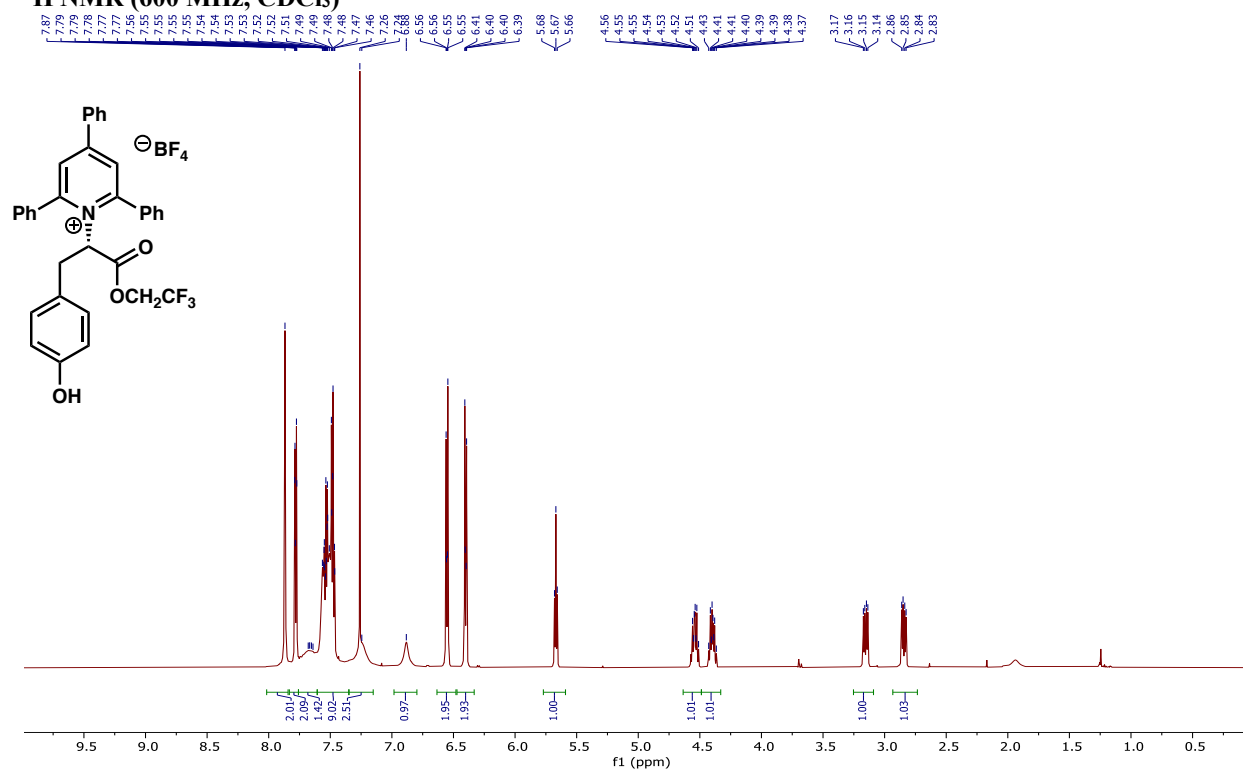

**<sup>13</sup>C NMR (151 MHz, CDCl<sub>3</sub>)**

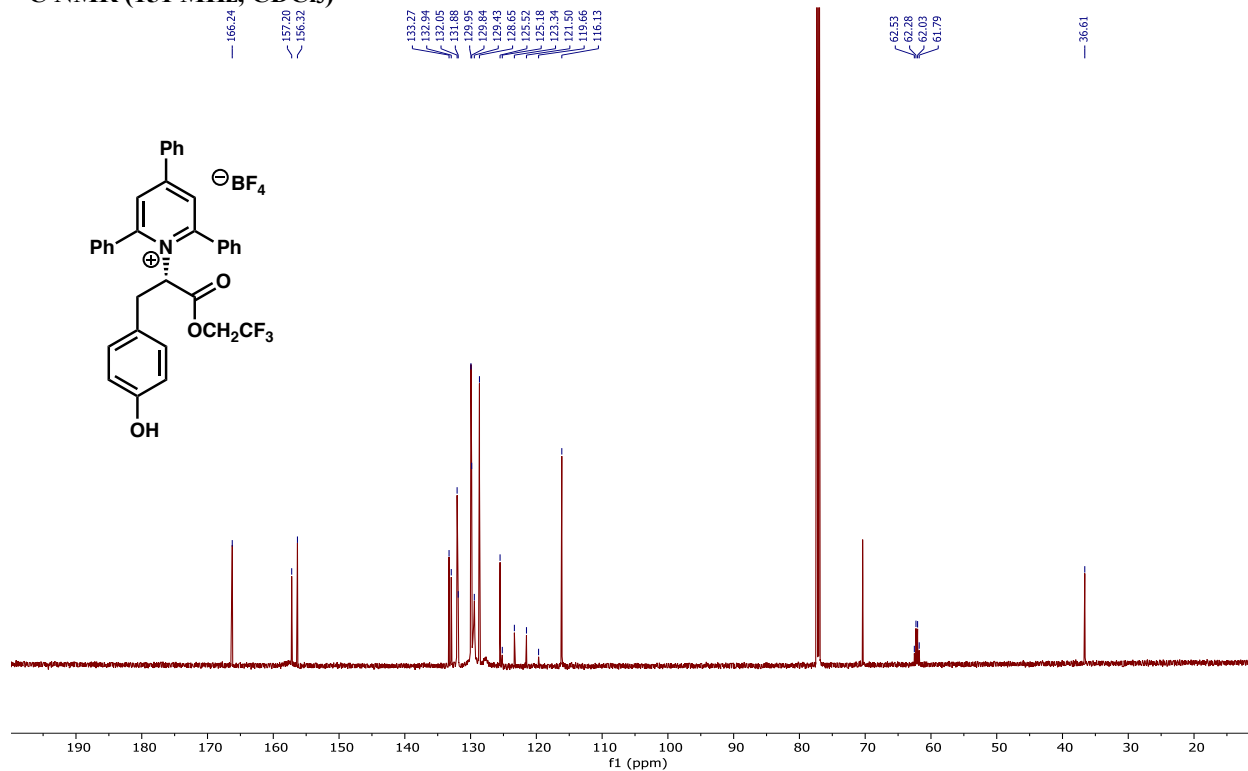

**<sup>19</sup>F NMR (565 MHz, CDCl<sub>3</sub>)**

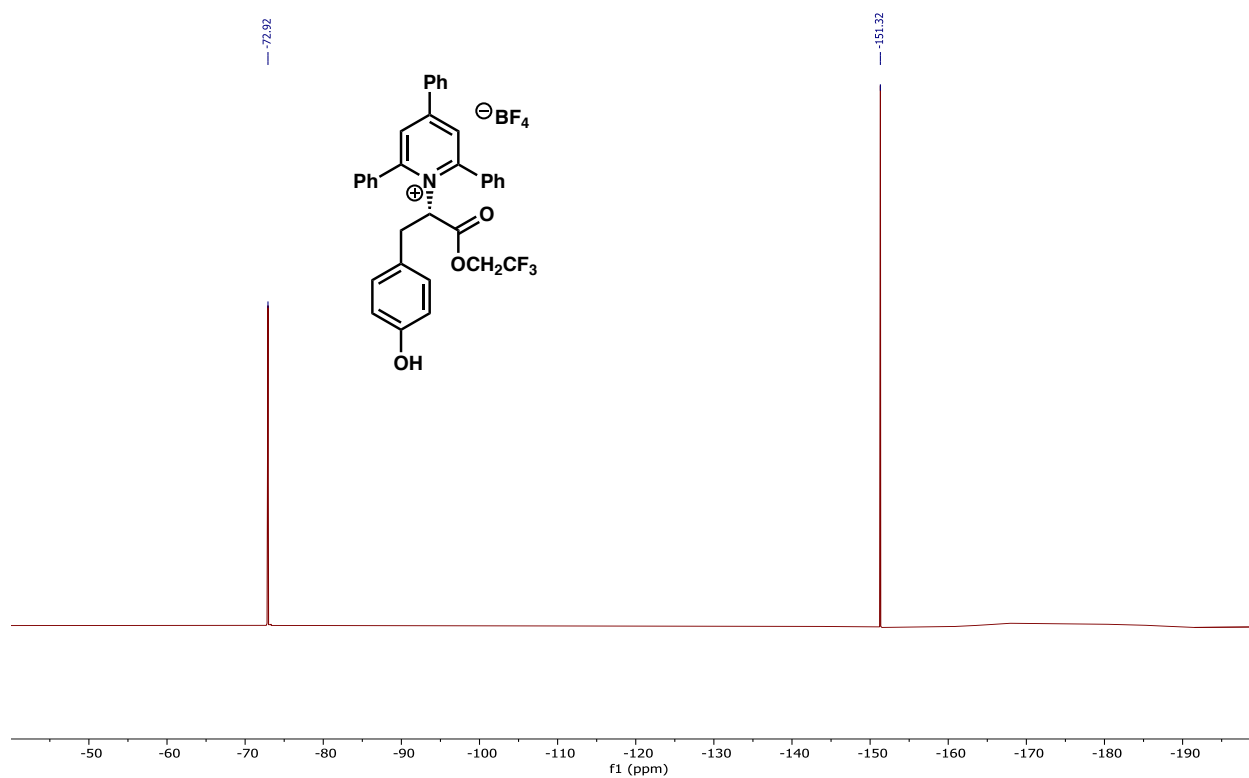

**1-(3-(3-Hydroxyphenyl)-1-oxo-1-(2,2,2-trifluoroethoxy)propan-2-yl)-2,4,6-triphenylpyridin-1-ium, 12k:**

**<sup>1</sup>H NMR (400 MHz, CDCl<sub>3</sub>)**

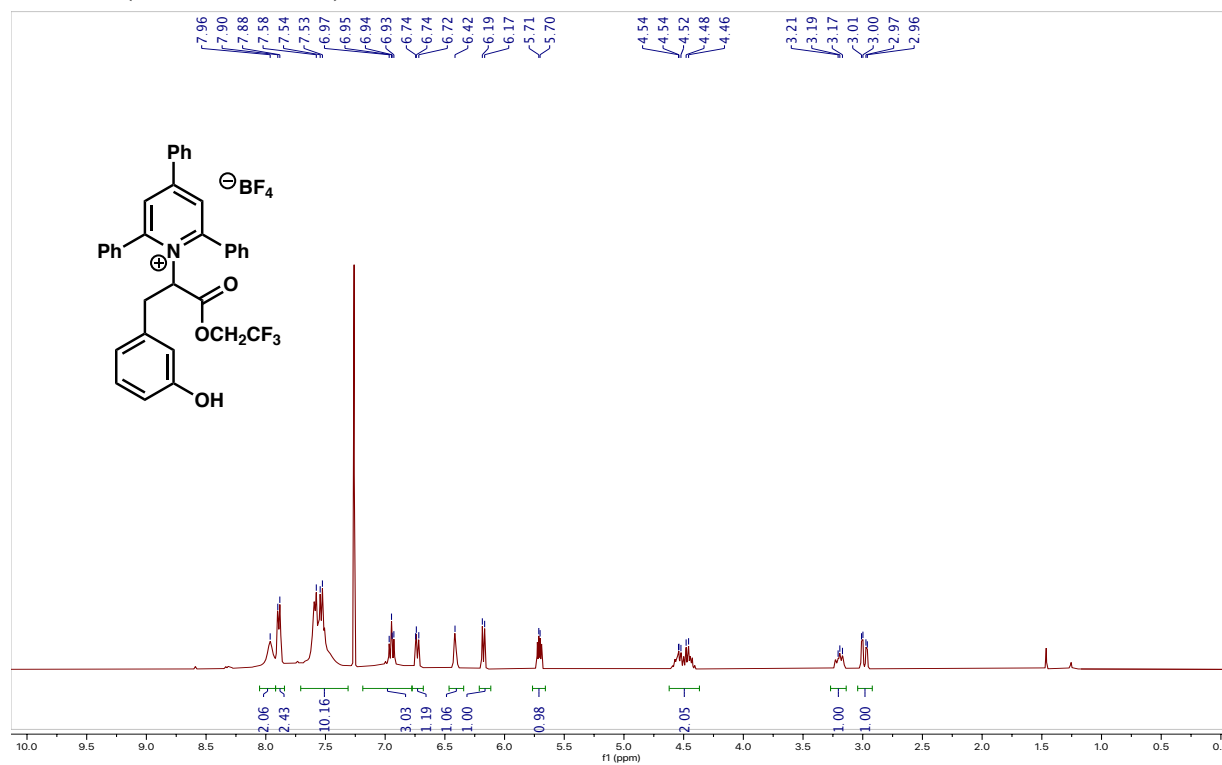

**<sup>13</sup>C NMR (151 MHz, CDCl<sub>3</sub>)**

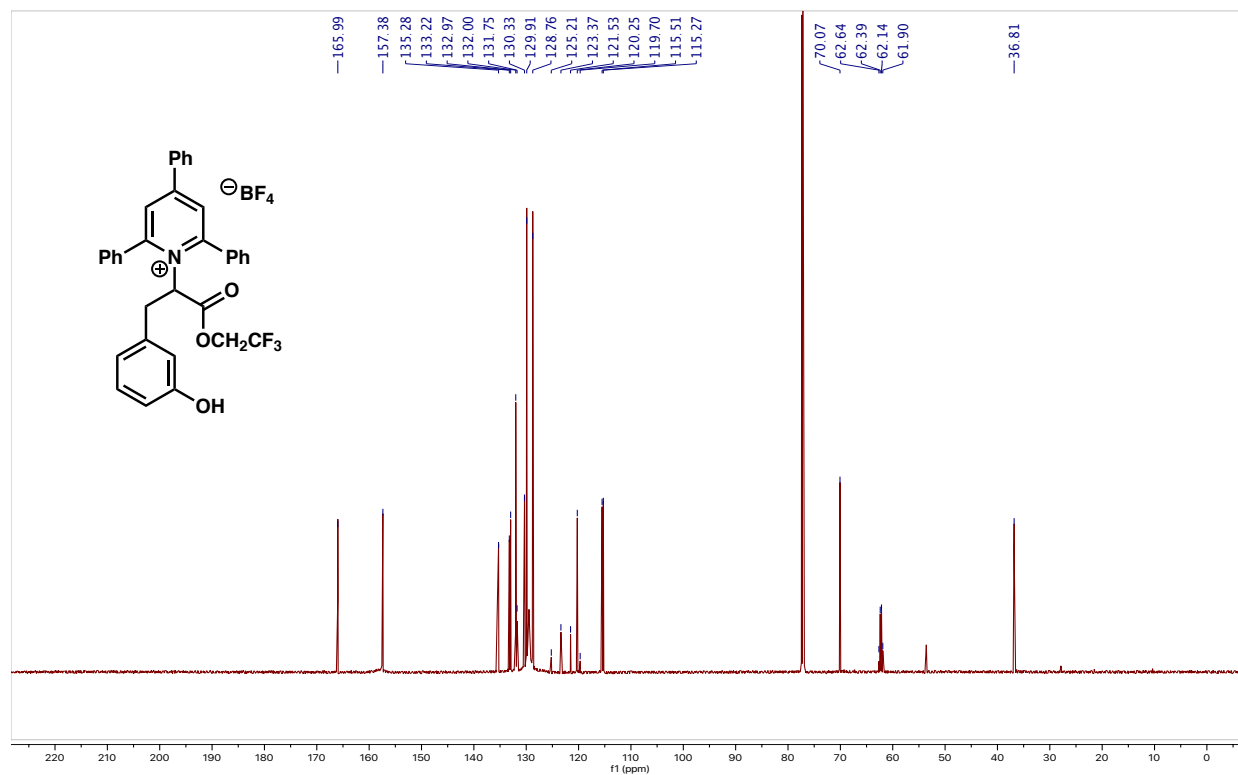

**<sup>19</sup>F NMR (565 MHz, CDCl<sub>3</sub>)**

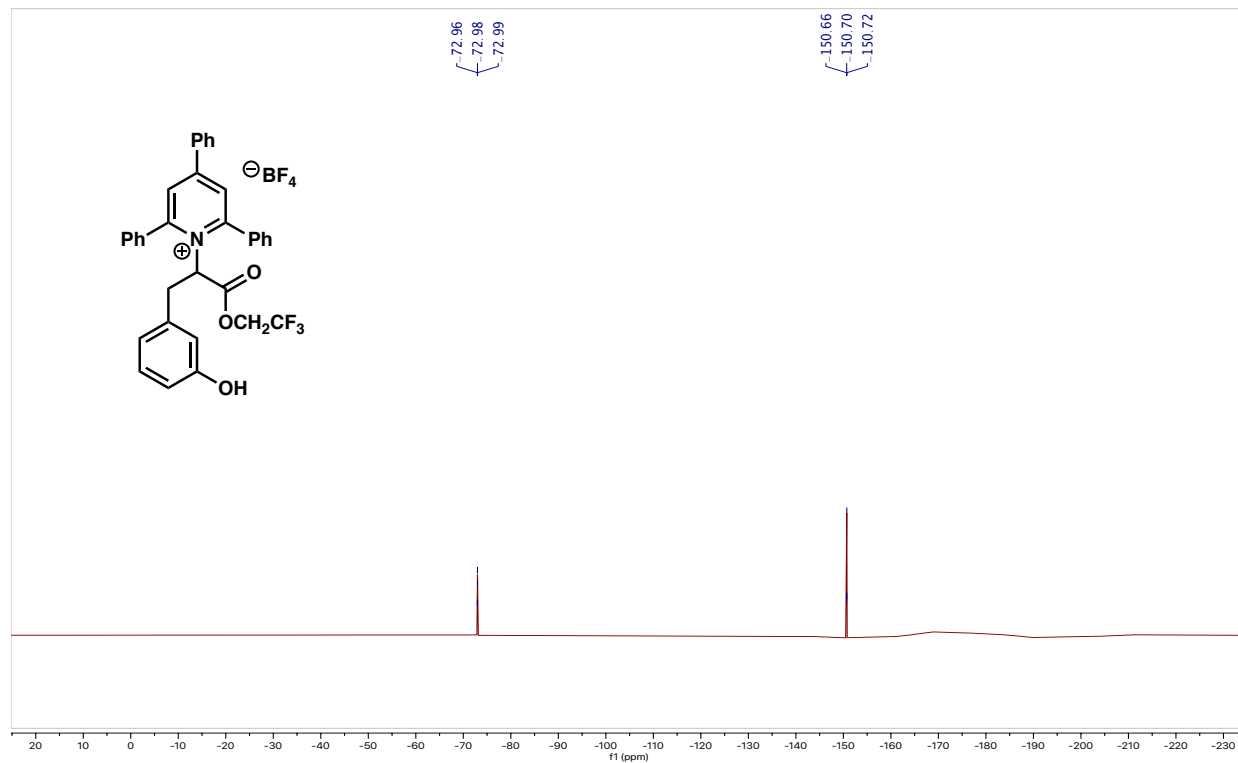

# 1-(2-oxo-2-Phenylethyl)-2,4,6-triphenylpyridin-1-ium tetrafluoroborate, 14a:

<sup>1</sup>H NMR (600 MHz, DMSO)

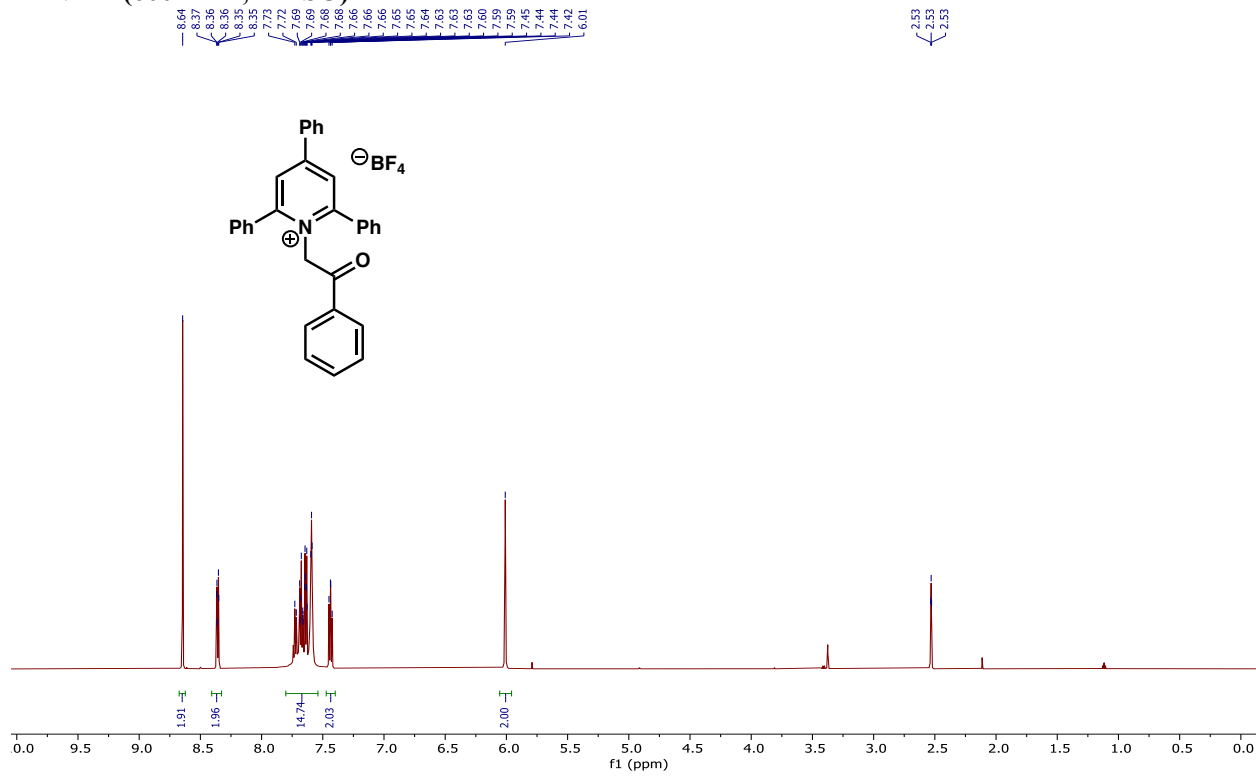

<sup>13</sup>C NMR (151 MHz, DMSO)

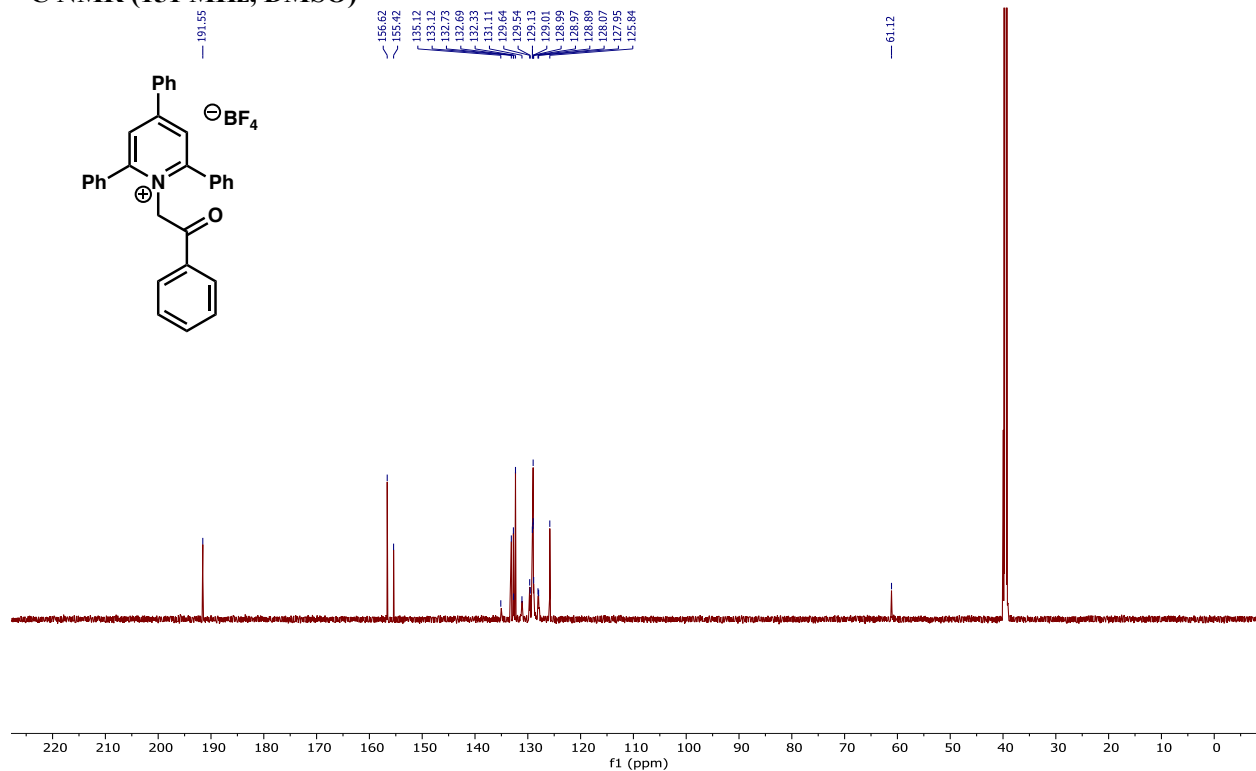



**<sup>19</sup>F NMR (565 MHz, DMSO)**

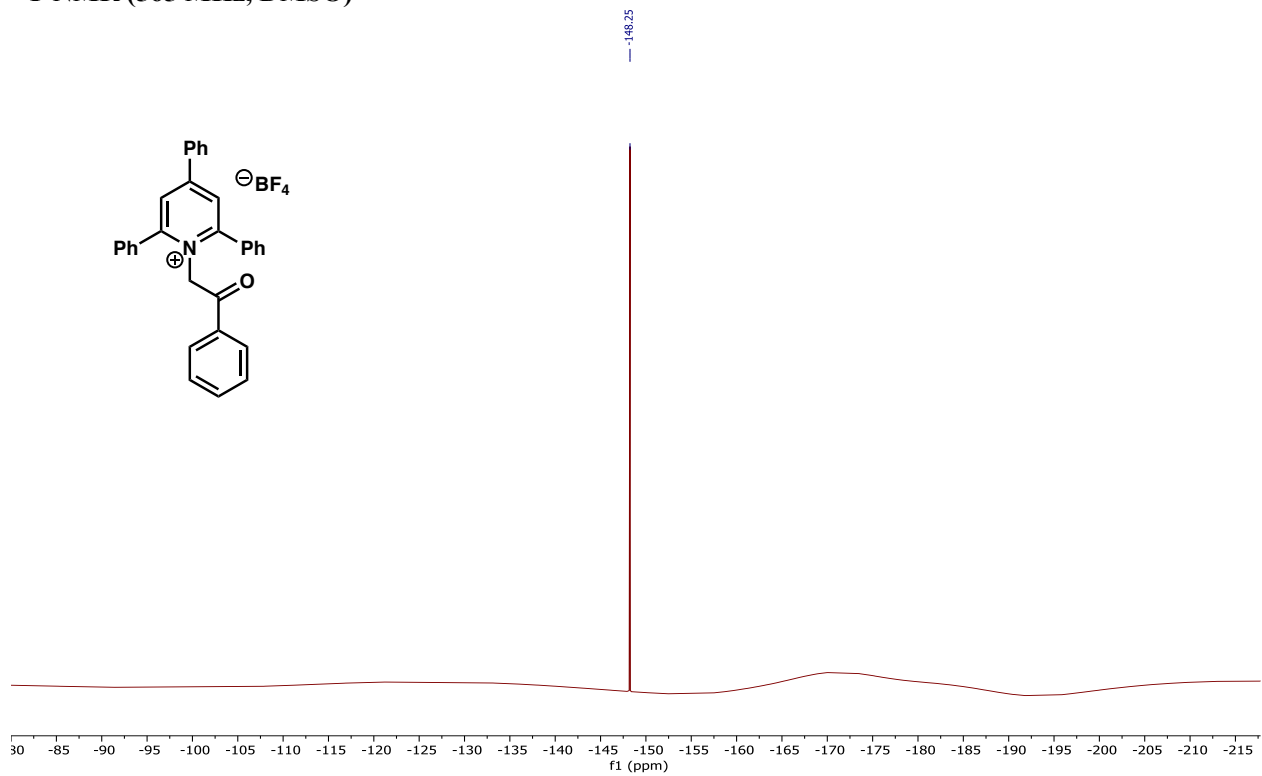

**1-(2-oxo-2-(p-Tolyl)ethyl)-2,4,6-triphenylpyridin-1-ium tetrafluoroborate, 14b:**

**<sup>1</sup>H NMR (600 MHz, DMSO)**

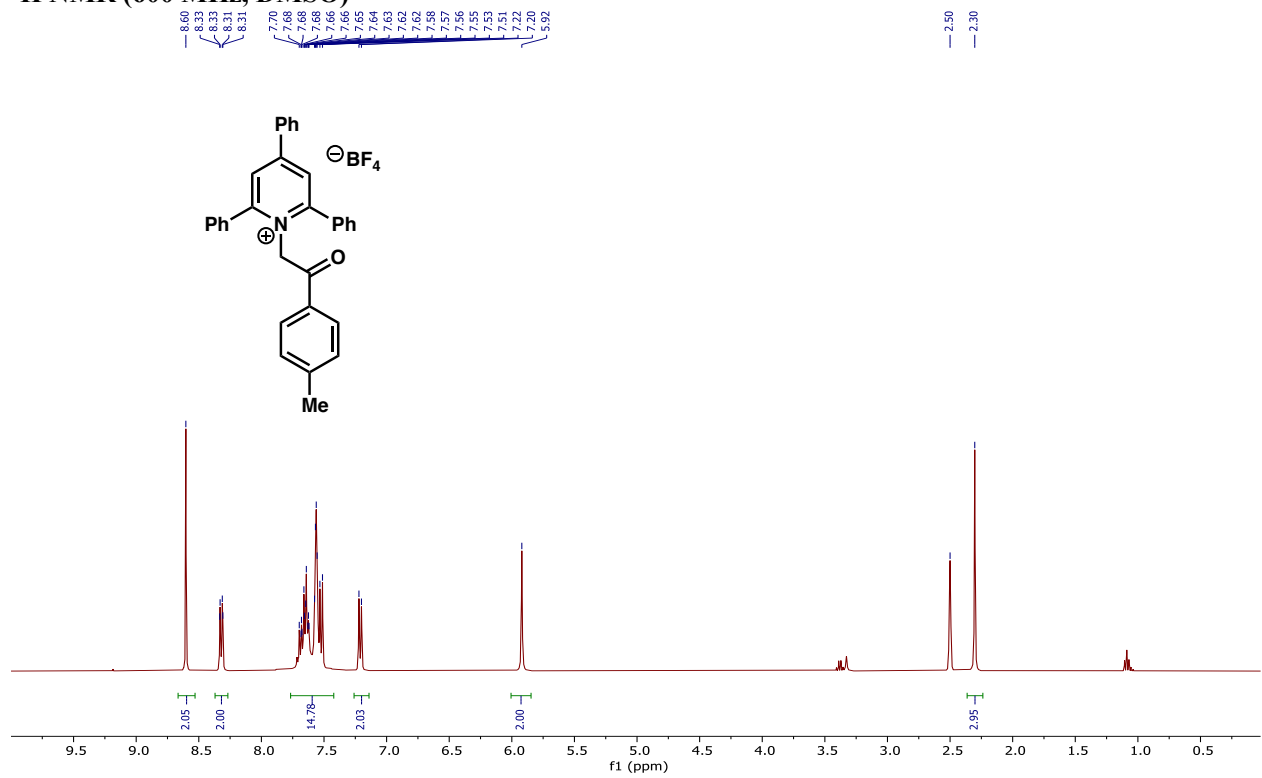

### <sup>13</sup>C NMR (151 MHz, DMSO)

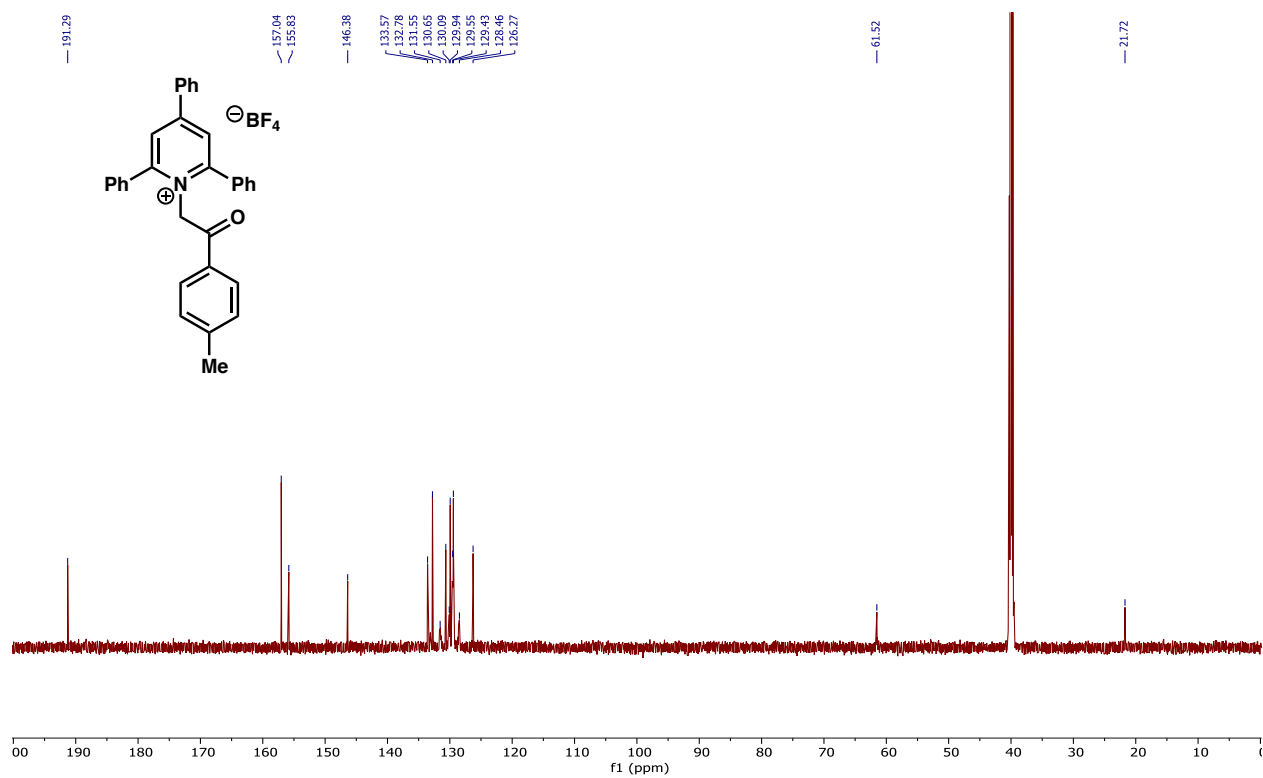

### <sup>19</sup>F NMR (565 MHz, DMSO)

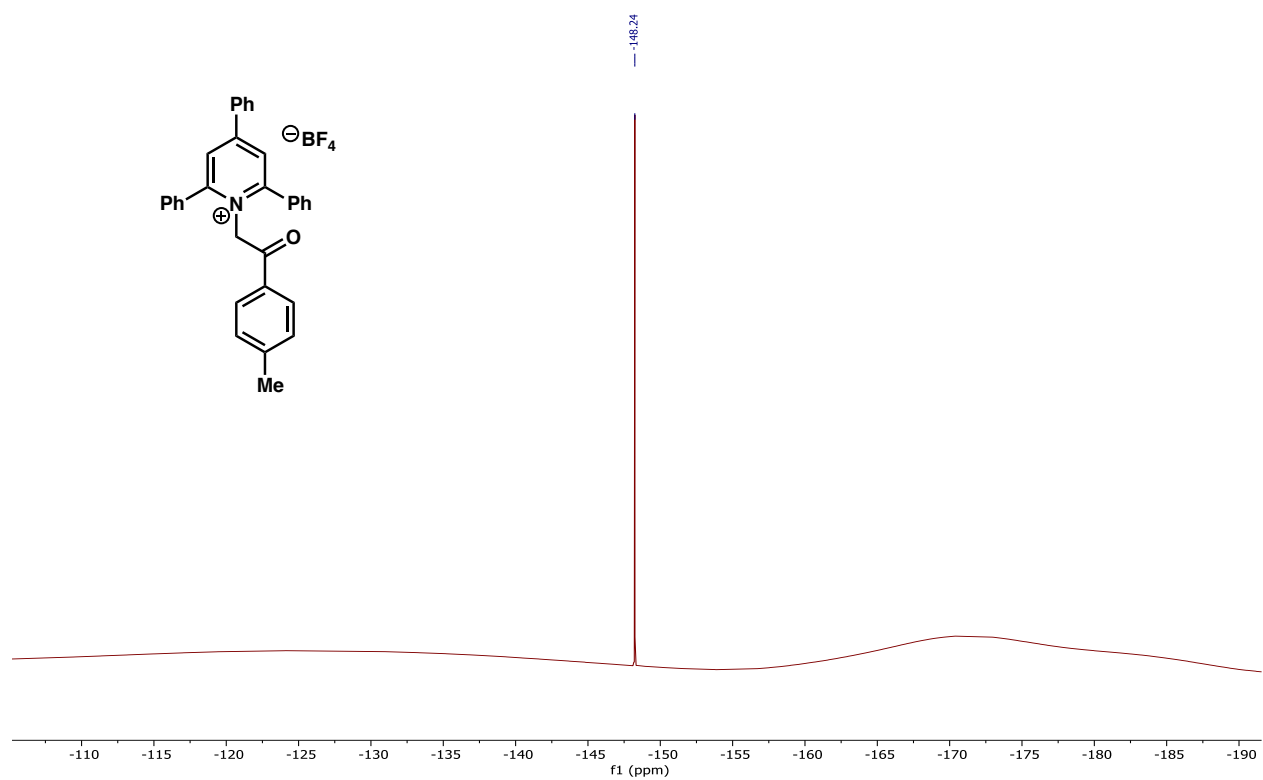

1-(2-(4-Bromophenyl)-2-oxoethyl)-2,4,6-triphenylpyridin-1-ium, 14c :

<sup>1</sup>H NMR (600 MHz, CDCl<sub>3</sub>)

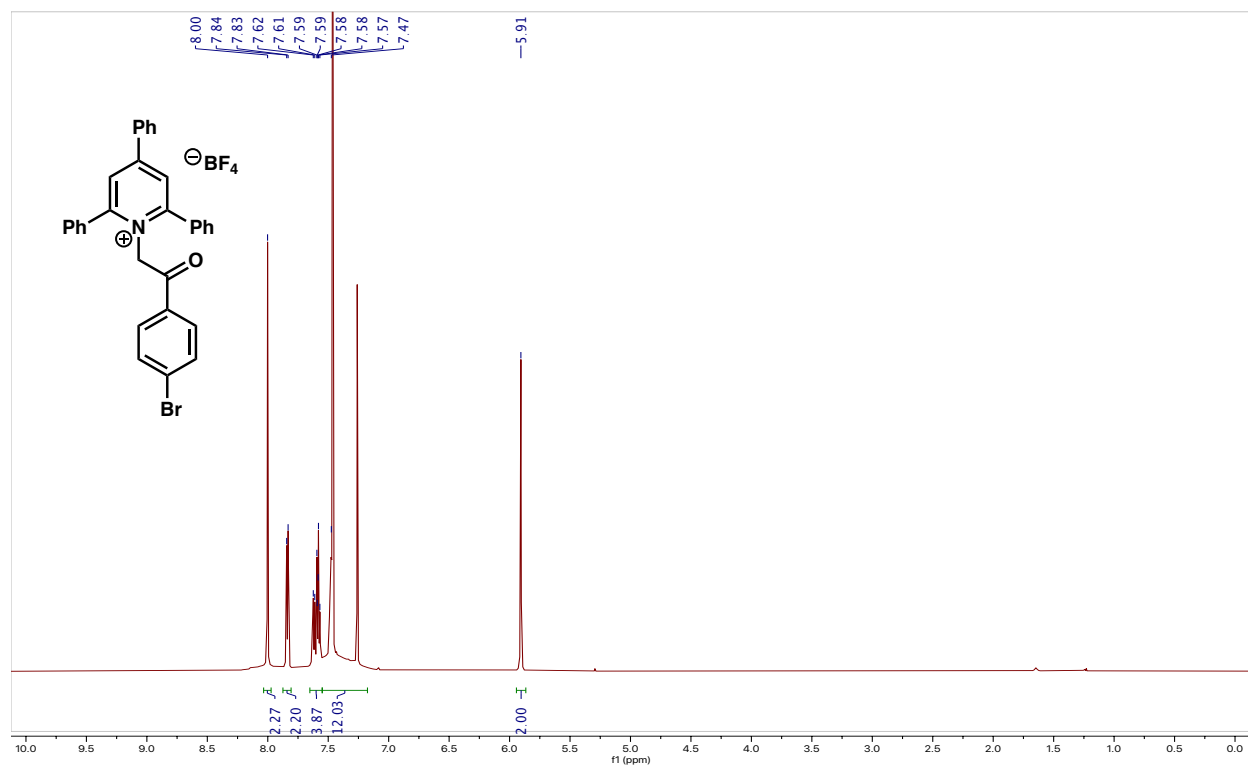

<sup>13</sup>C NMR (151 MHz, CDCl<sub>3</sub>)

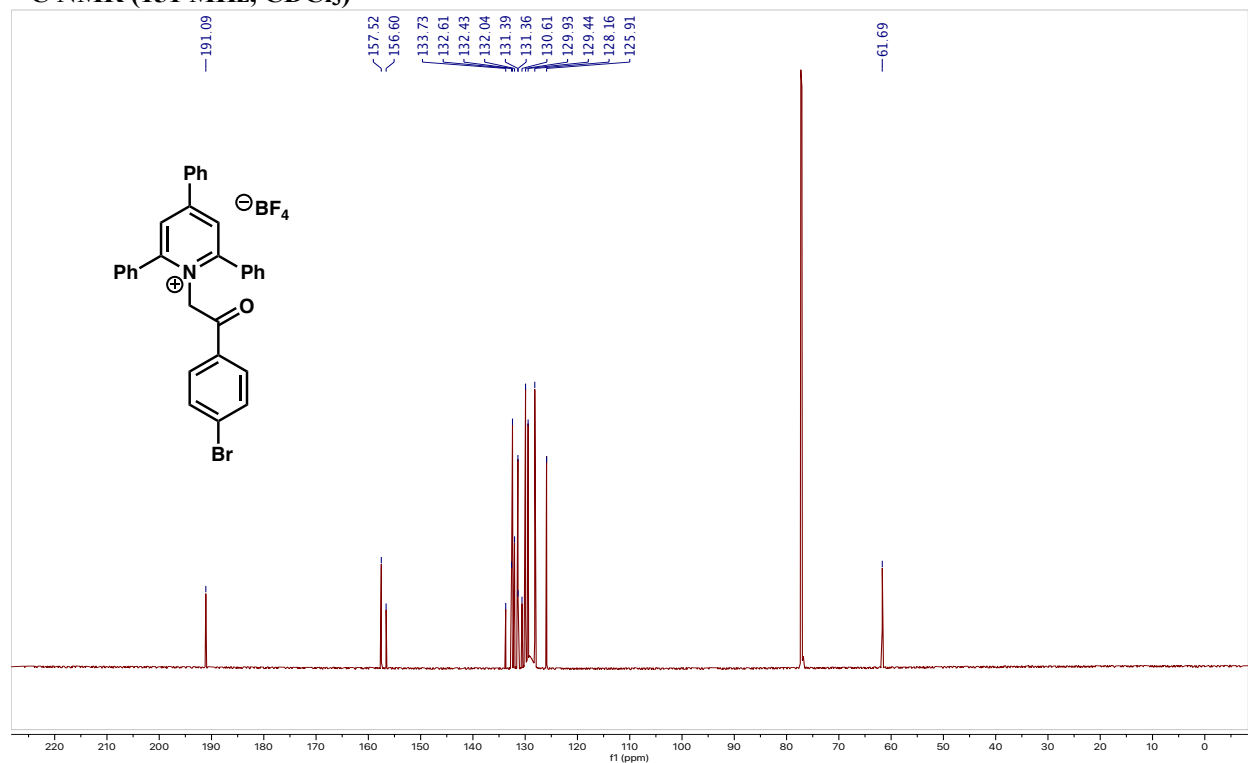

**<sup>19</sup>F NMR (565 MHz, CDCl<sub>3</sub>)**

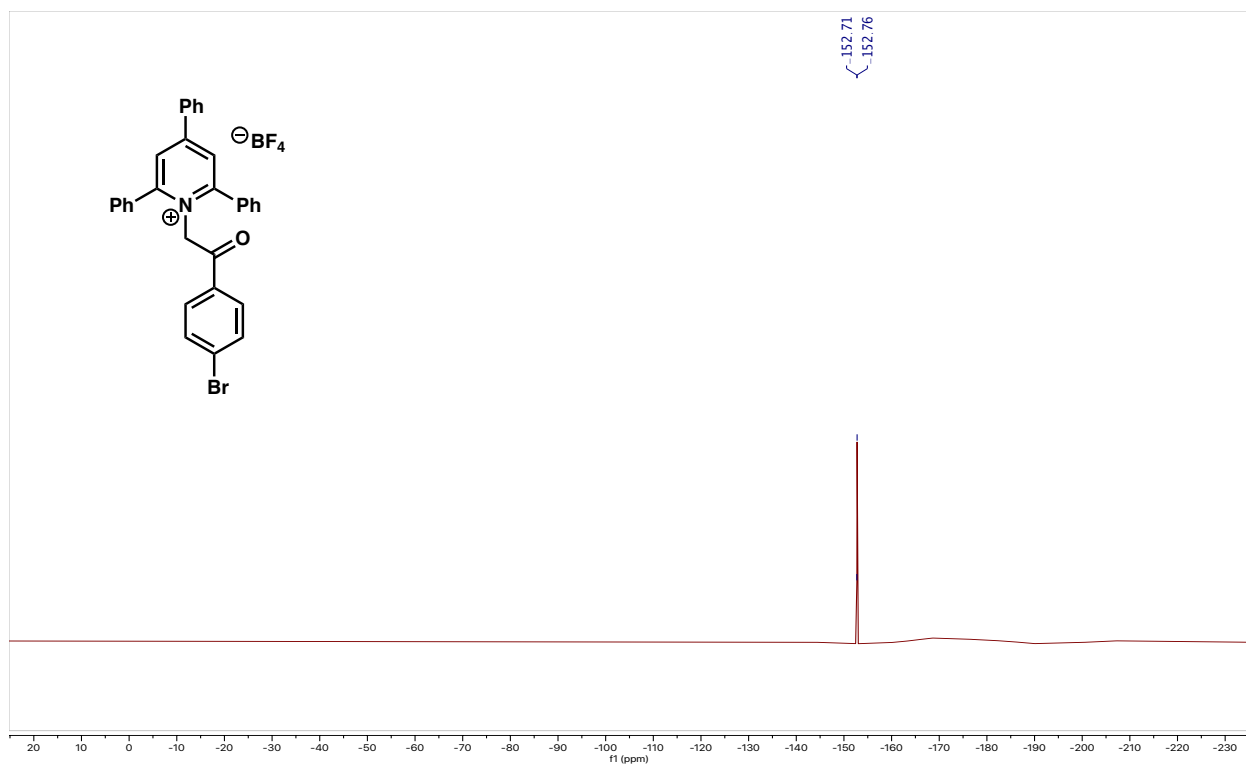

**1-(2-(4-Chlorophenyl)-2-oxoethyl)-2,4,6-triphenylpyridin-1-ium tetrafluoroborate, 14d:**

**<sup>1</sup>H NMR (600 MHz, CDCl<sub>3</sub>)**

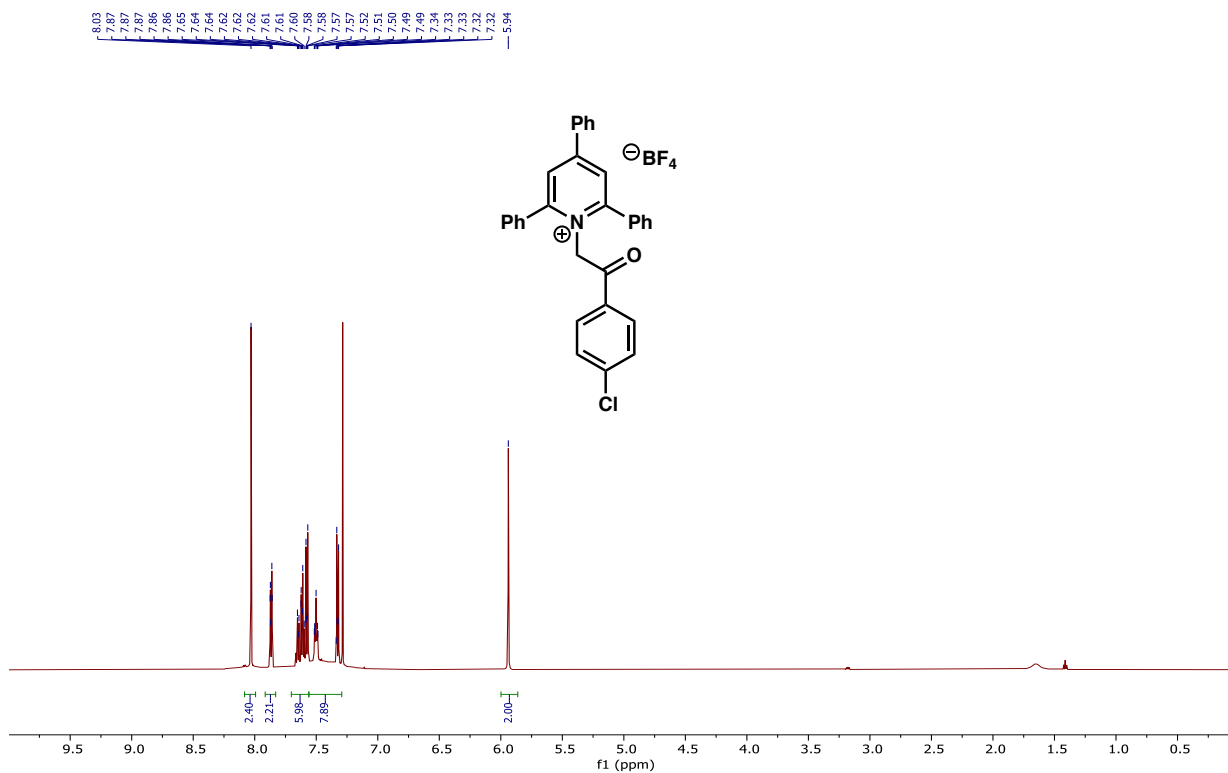

### <sup>13</sup>C NMR (101 MHz, DMSO)

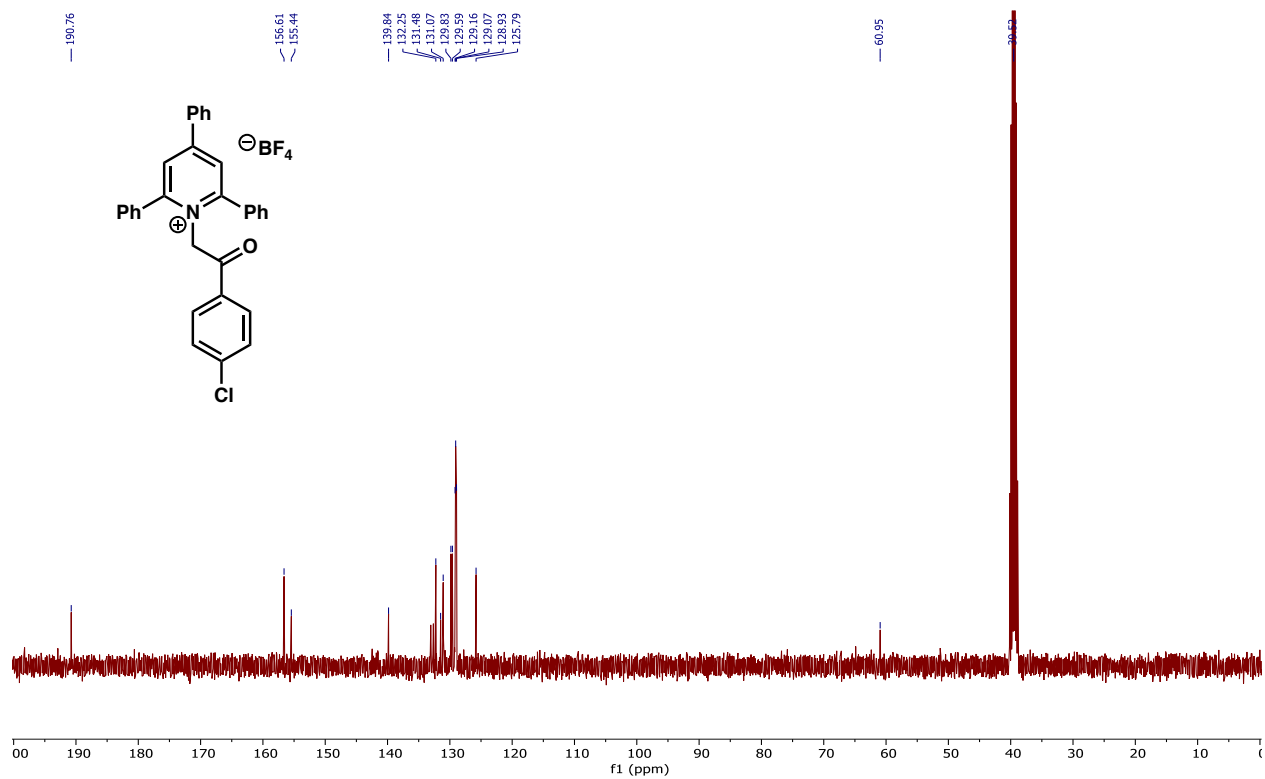

### <sup>19</sup>F NMR (565 MHz, DMSO)

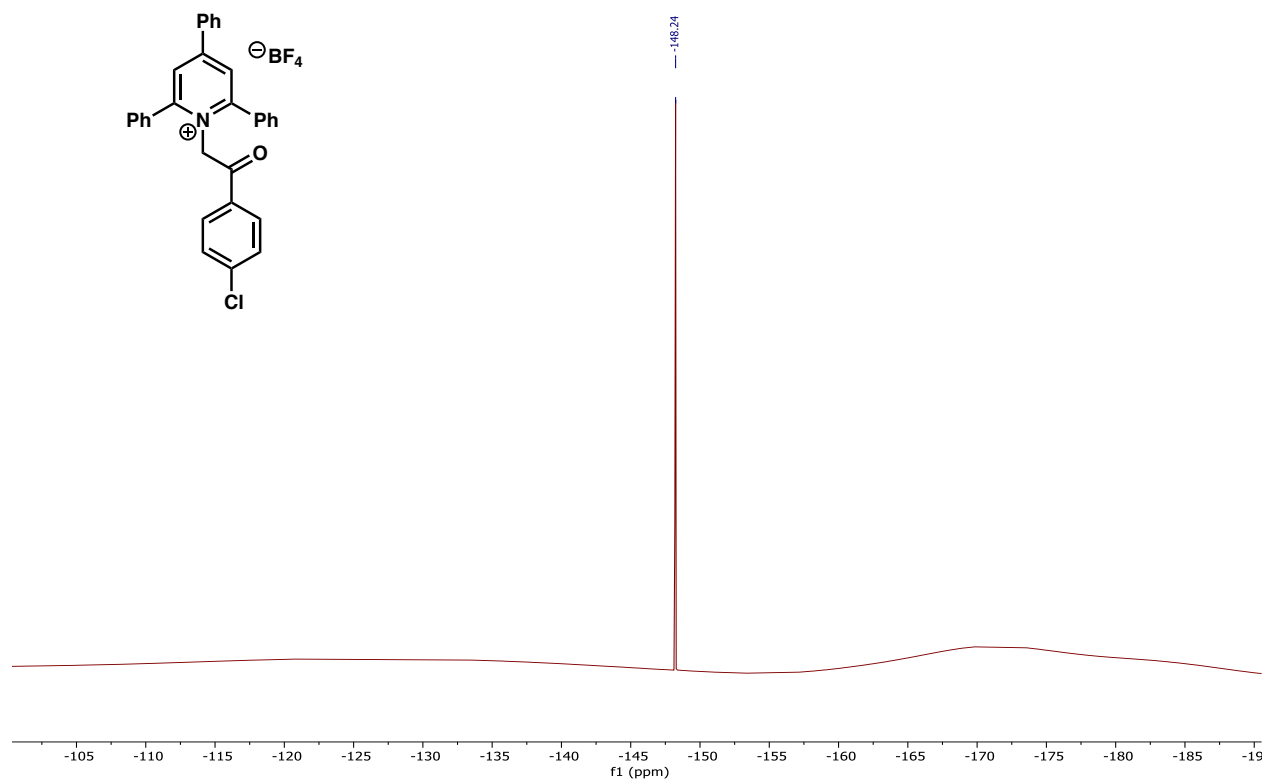

# 1-(2-(4-Fluorophenyl)-2-oxoethyl)-2,4,6-triphenylpyridin-1-ium tetrafluoroborate, 14e:

<sup>1</sup>H NMR (400 MHz, DMSO)

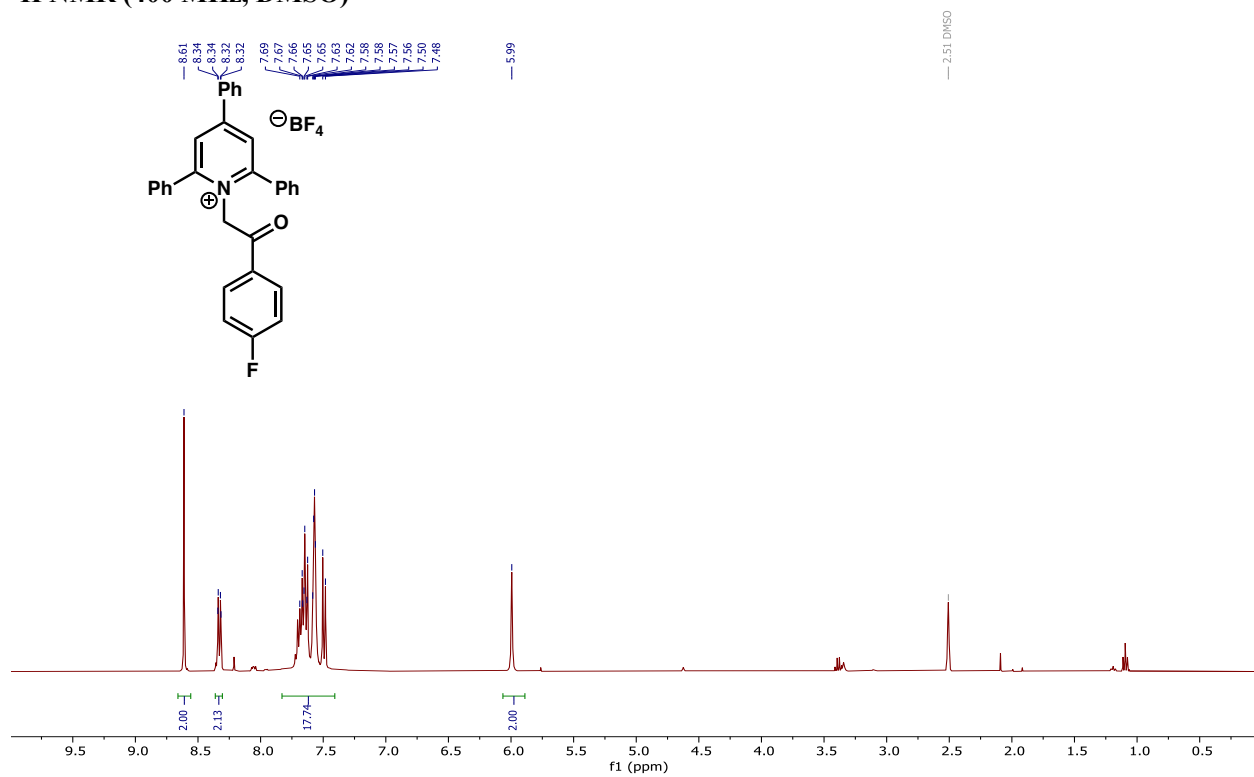

<sup>13</sup>C NMR (101 MHz, DMSO)

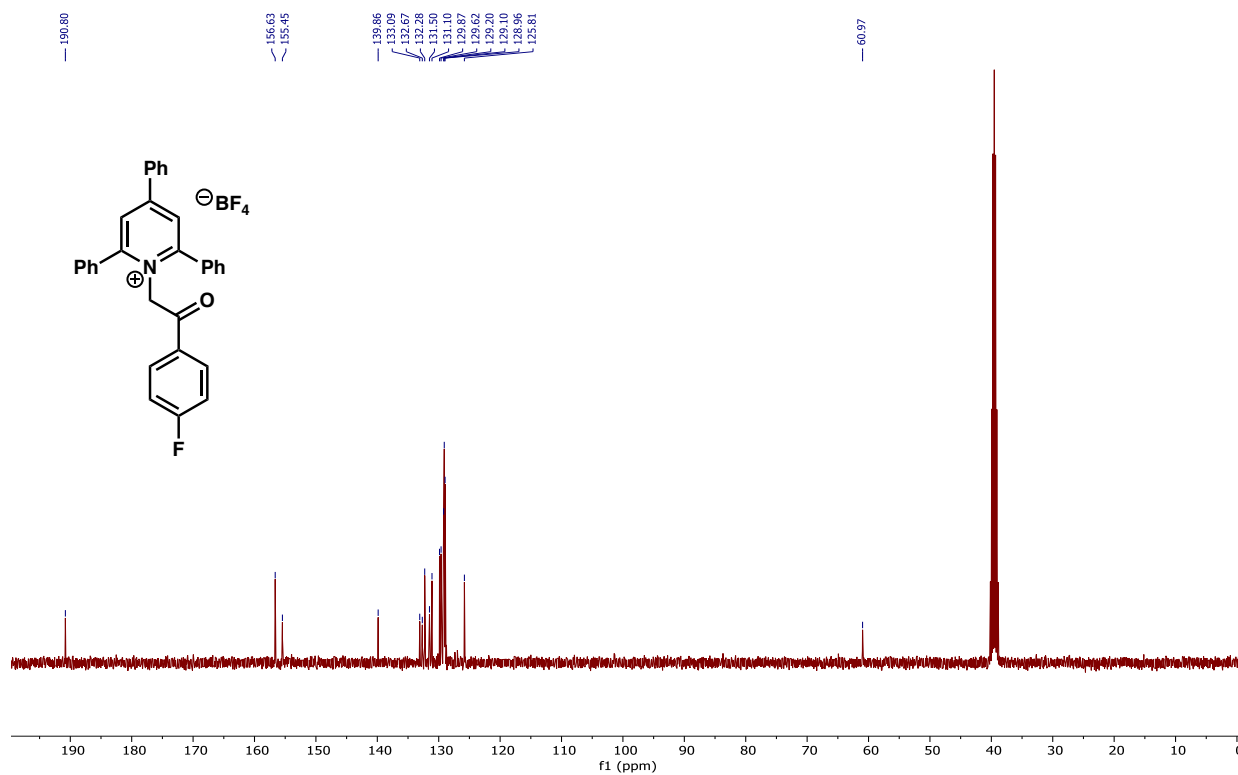

**$^{19}\text{F}$  NMR (565 MHz, DMSO)**

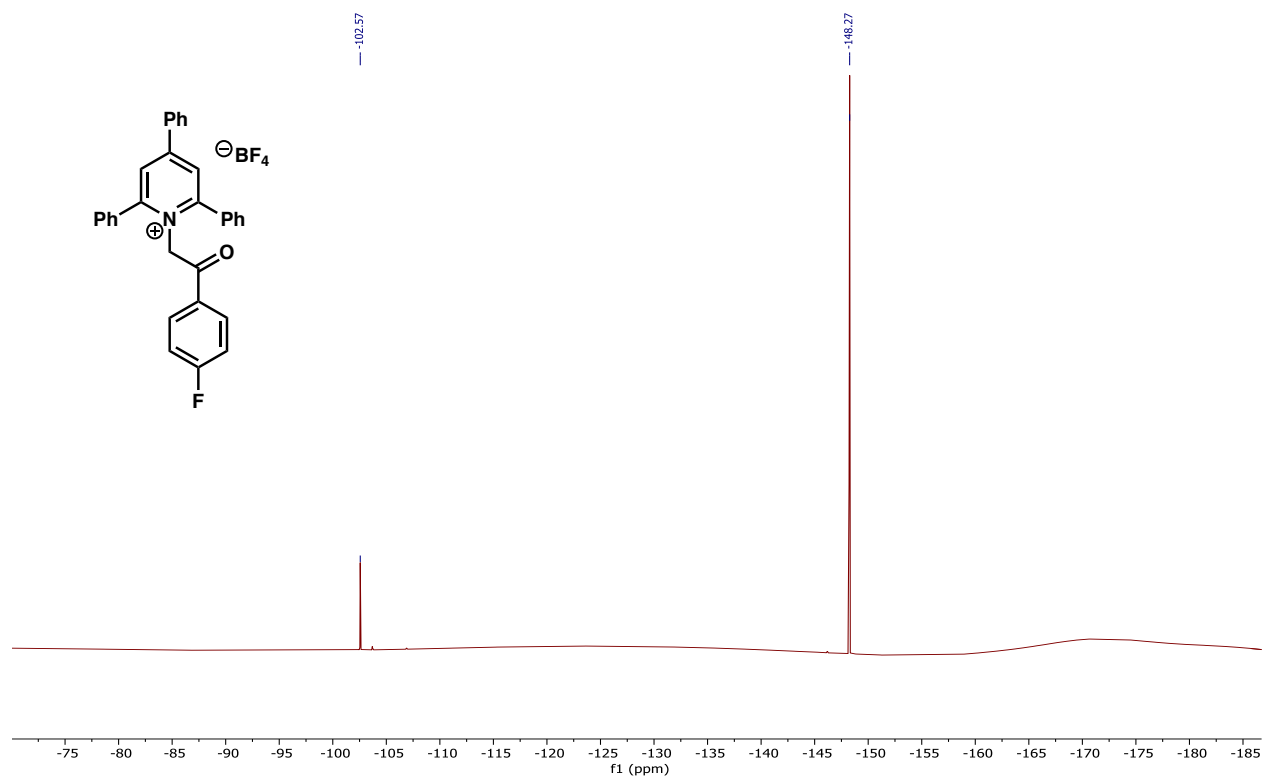

**1-(2-(2-Fluorophenyl)-2-oxoethyl)-2,4,6-triphenylpyridin-1-ium, 14f :**

**$^1\text{H}$  NMR (400 MHz,  $\text{CDCl}_3$ )**

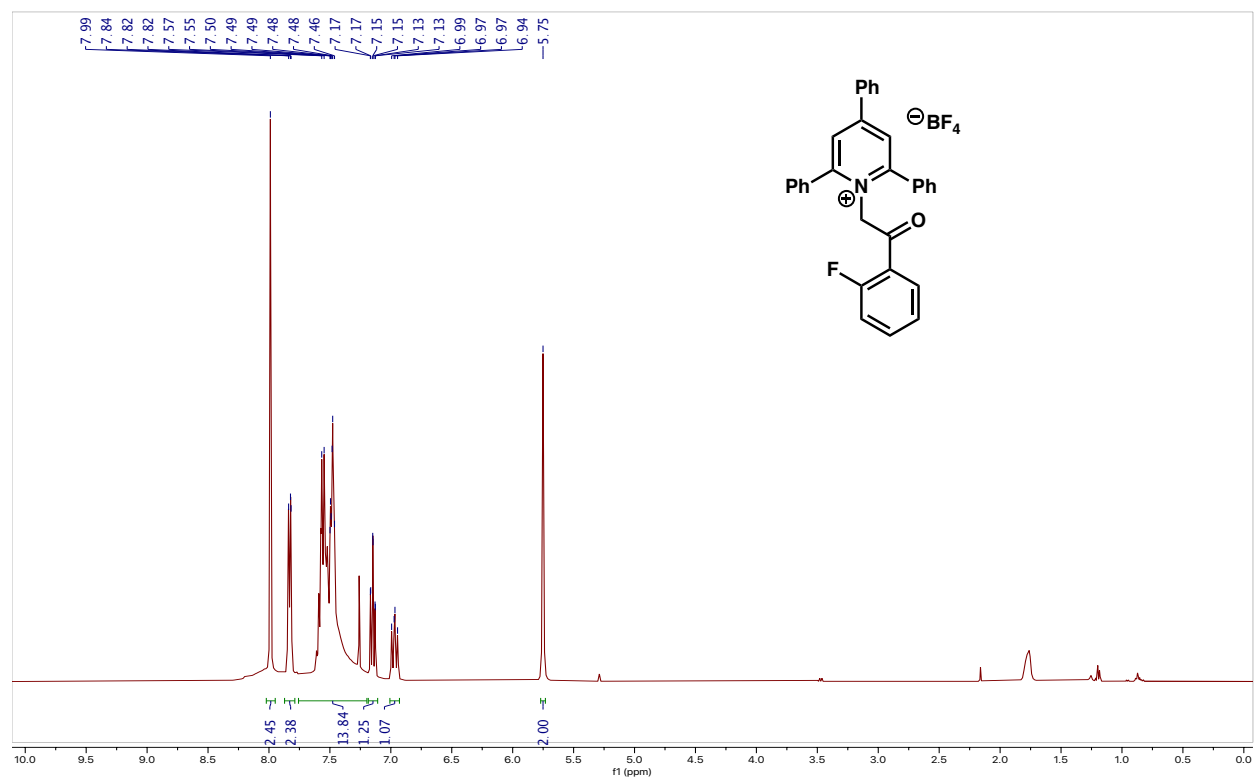

<sup>13</sup>C NMR (151 MHz, CDCl<sub>3</sub>)

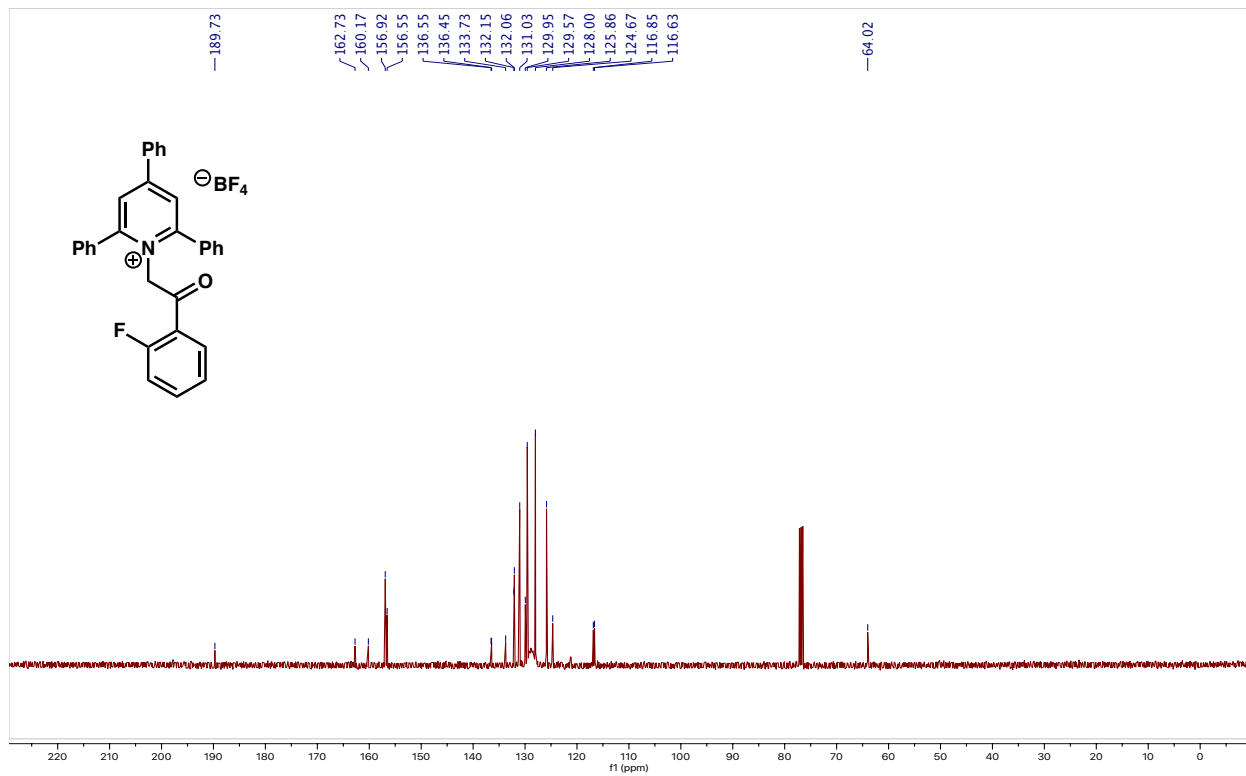

<sup>19</sup>F NMR (565 MHz, CDCl<sub>3</sub>)

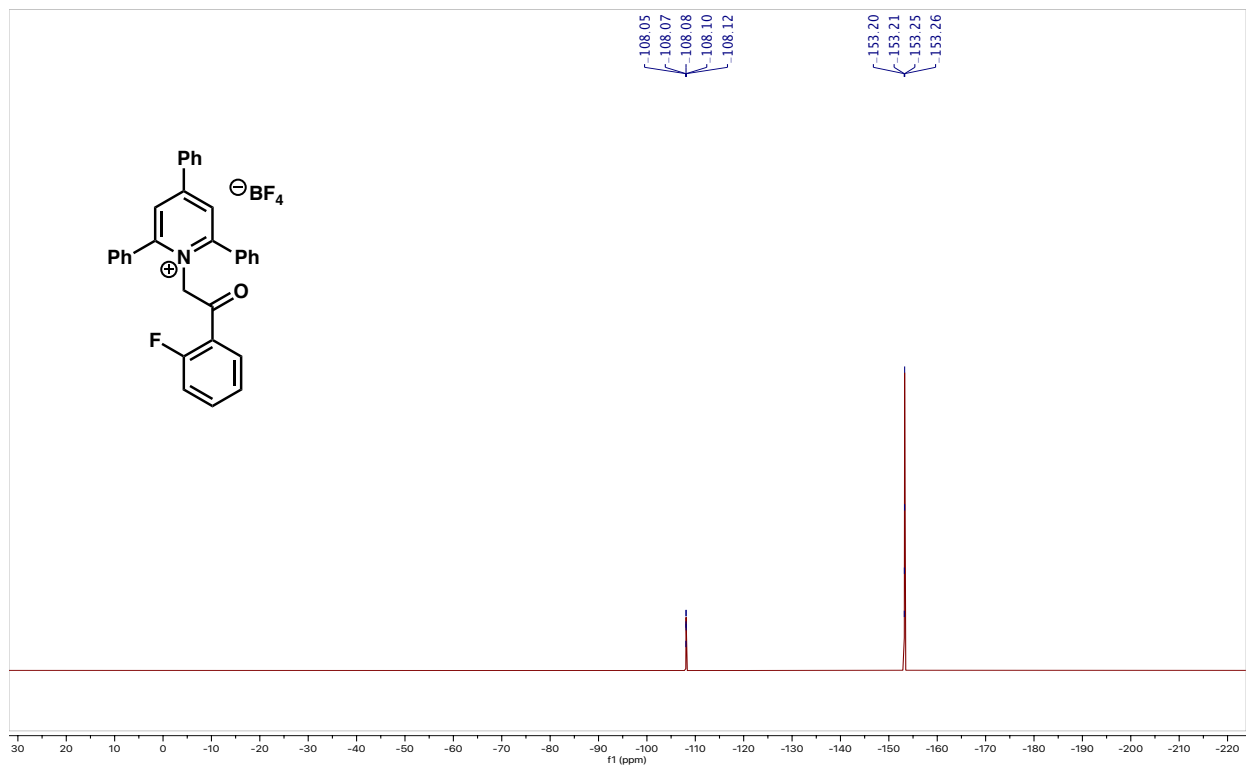



## 2,2,2-Trifluoroethyl (*R*)-3-benzyl-4-oxobutanoate, 13a:

$^1\text{H}$  NMR (500 MHz,  $\text{C}_6\text{D}_6$ )

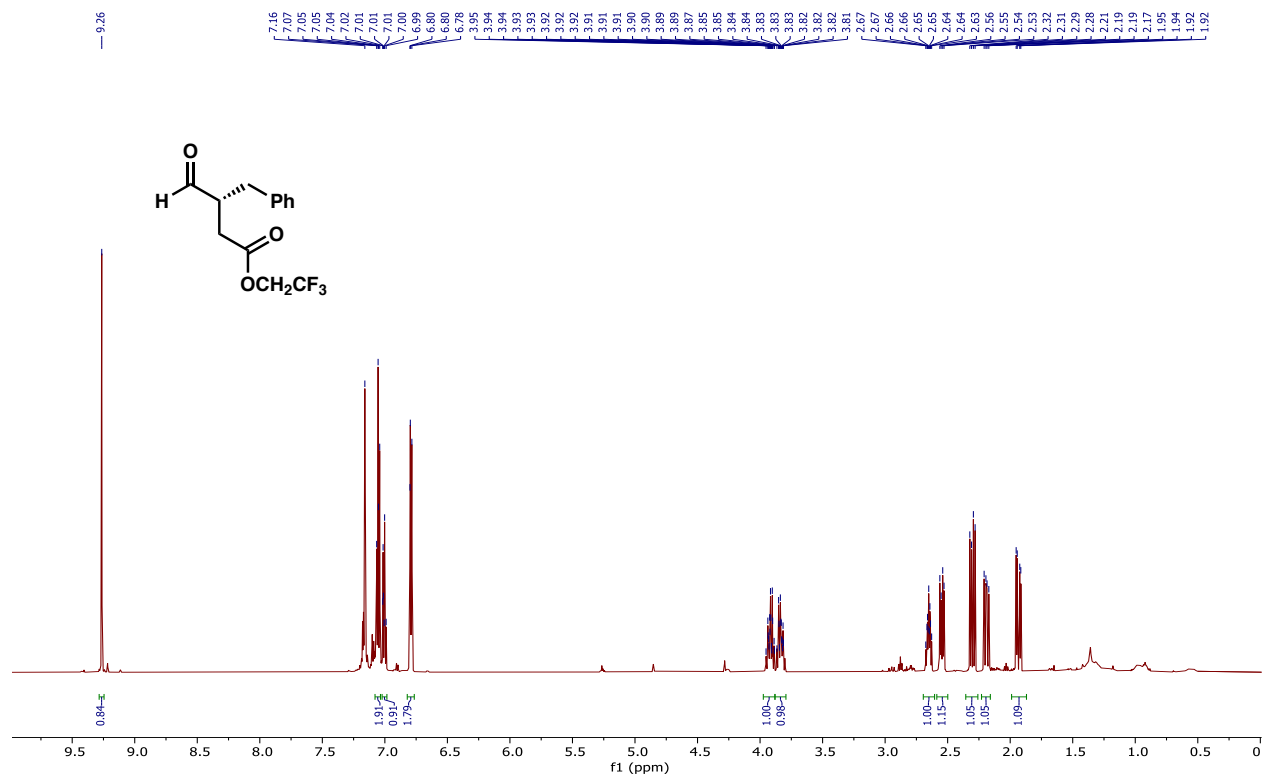

$^{13}\text{C}$  NMR (151 MHz,  $\text{C}_6\text{D}_6$ )

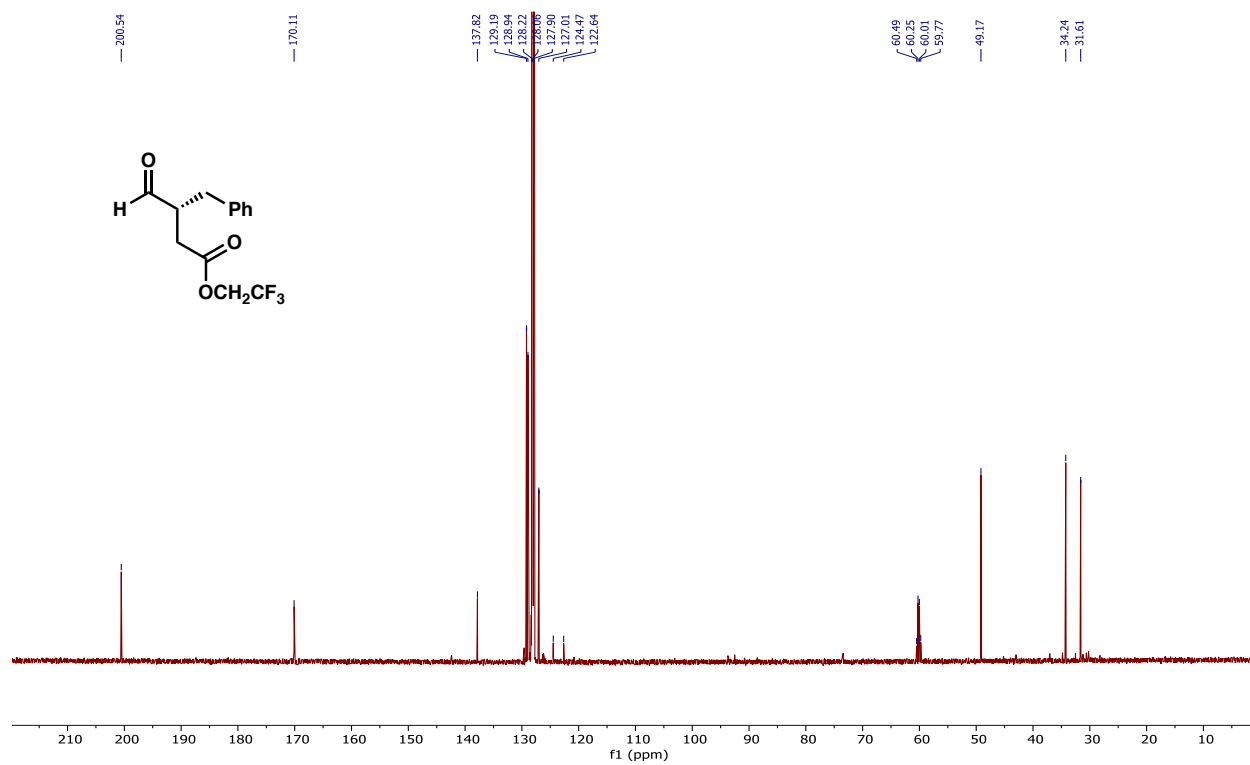

**$^{19}\text{F}$  NMR (565 MHz,  $\text{C}_6\text{D}_6$ )**

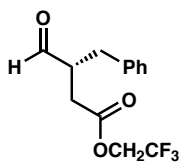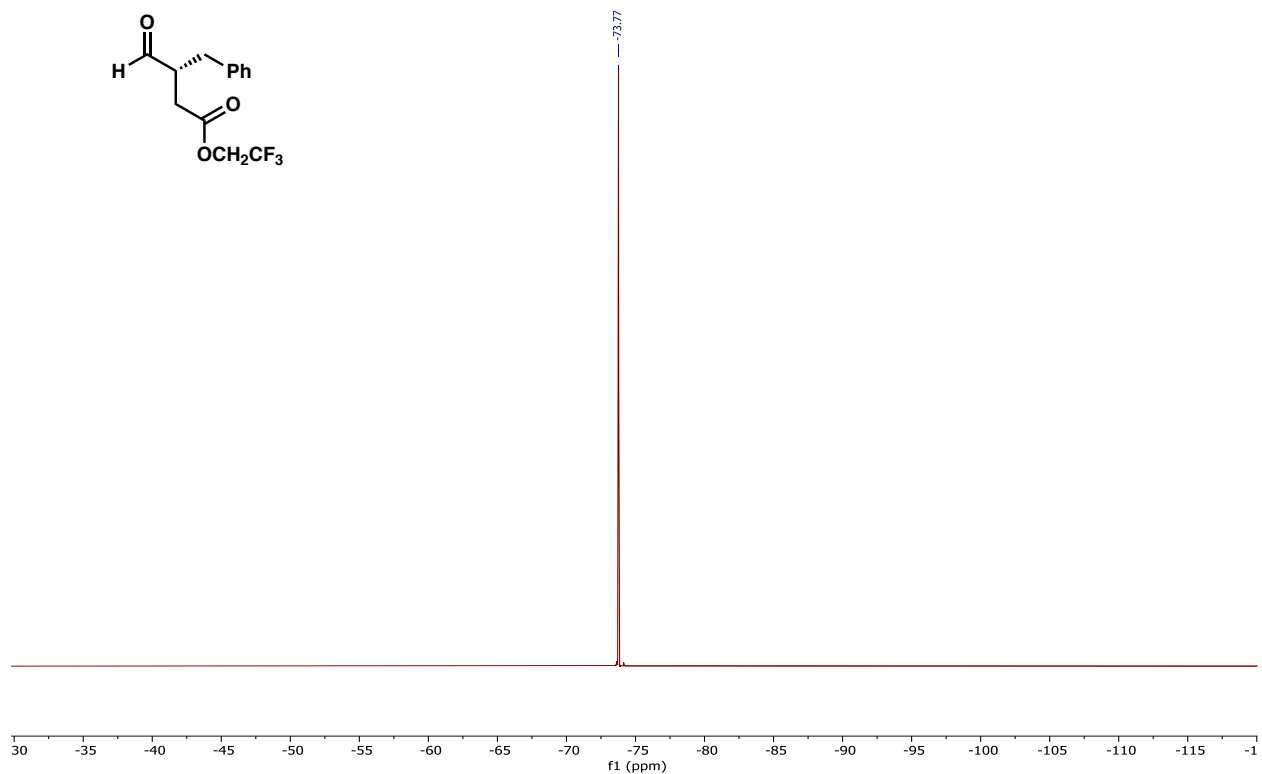

**(*R*)-4-Benzyl-2-(3*H*)-furanone, 13aa:**

**$^1\text{H}$  NMR (400 MHz,  $\text{CDCl}_3$ )**

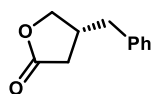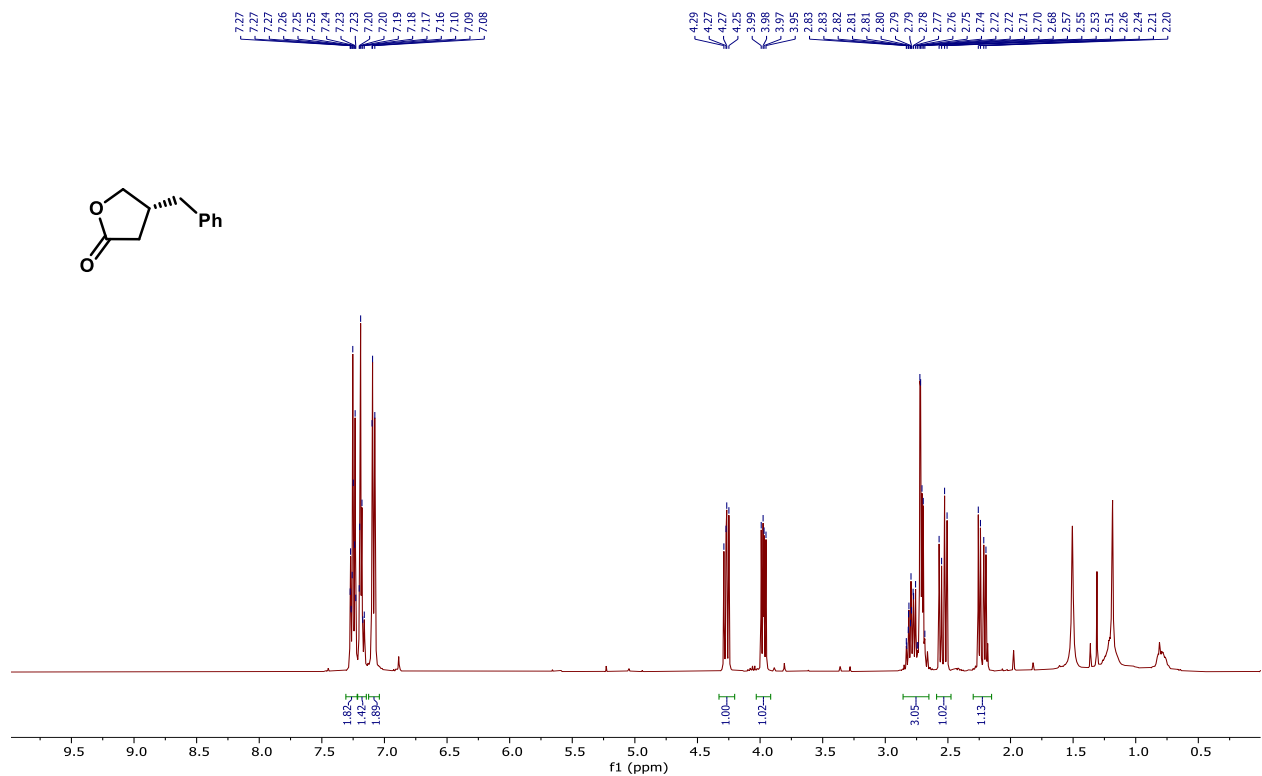

**$^{13}\text{C}$  NMR (101 MHz,  $\text{CDCl}_3$ )**

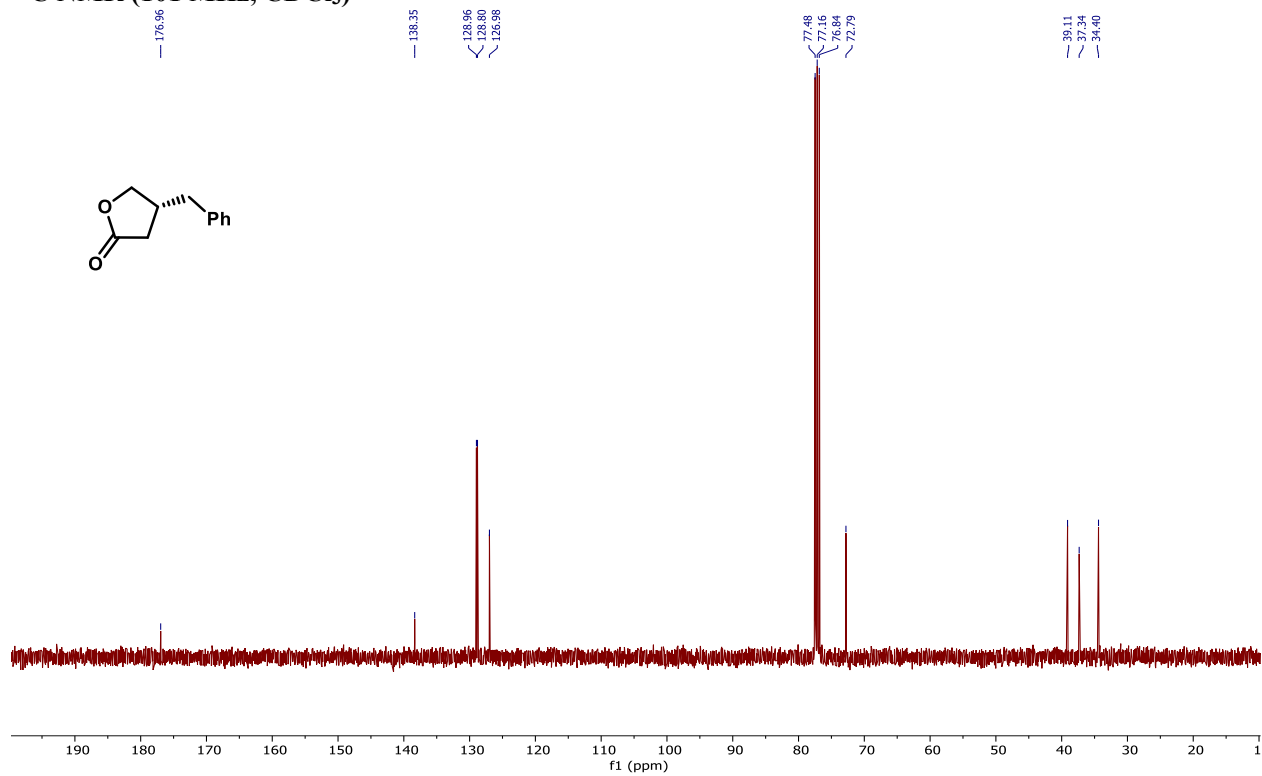

**2,2,2-Trifluoroethyl (R)-3-formylheptanoate, 13b:**

**$^1\text{H}$  NMR (600 MHz,  $\text{C}_6\text{D}_6$ )**

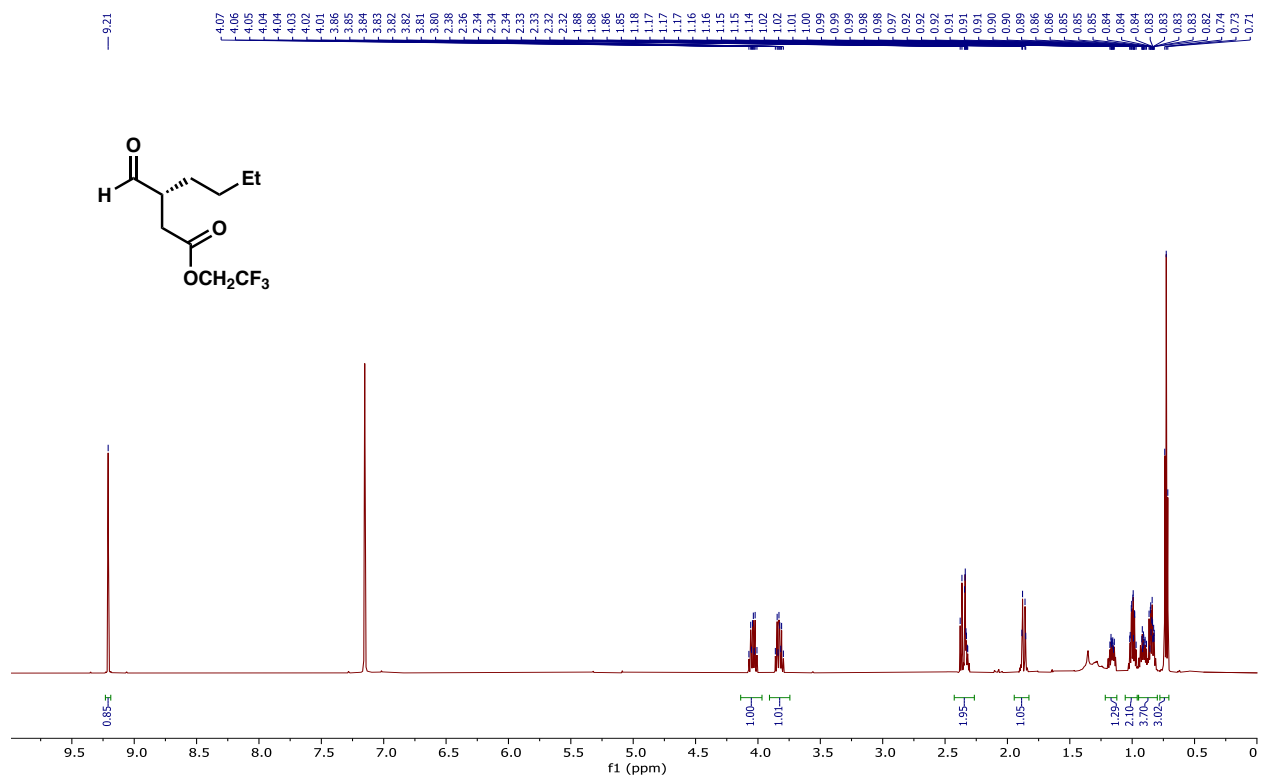

**$^{13}\text{C}$  NMR (151 MHz,  $\text{C}_6\text{D}_6$ )**

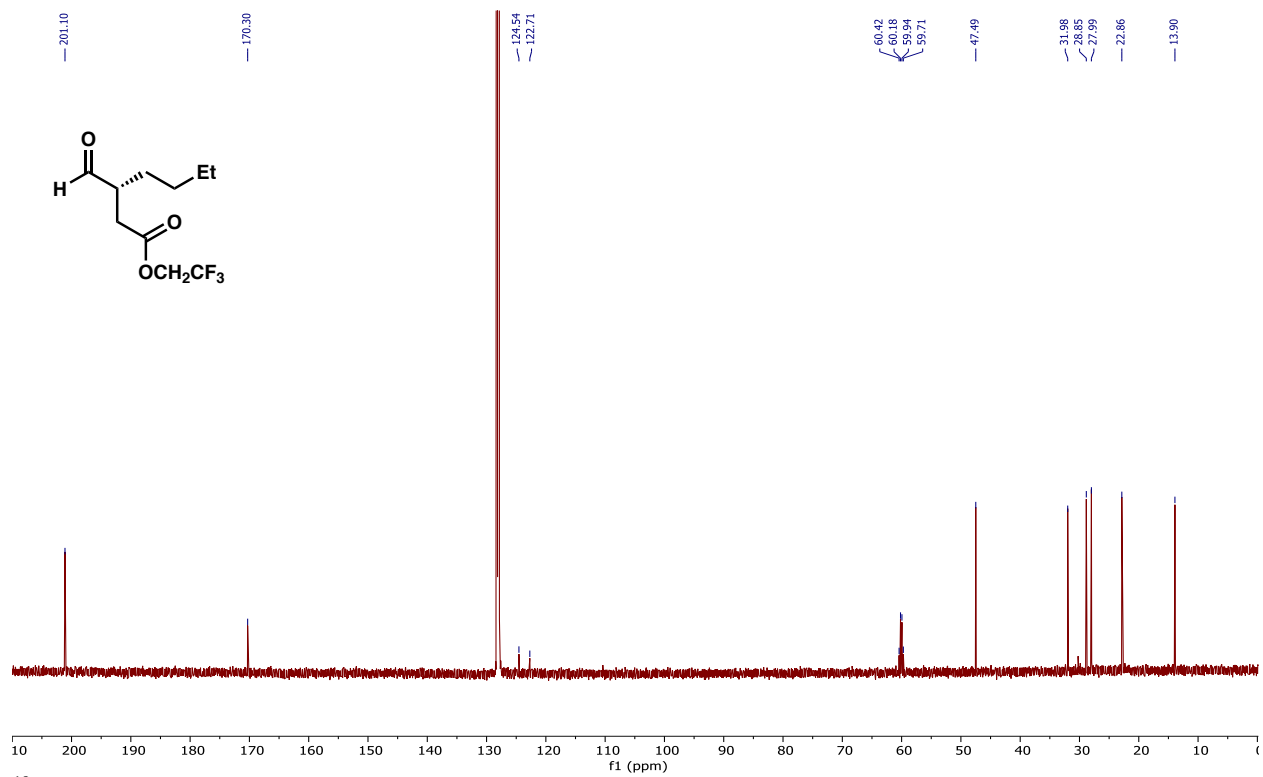

**$^{19}\text{F}$  NMR (600 MHz,  $\text{C}_6\text{D}_6$ )**

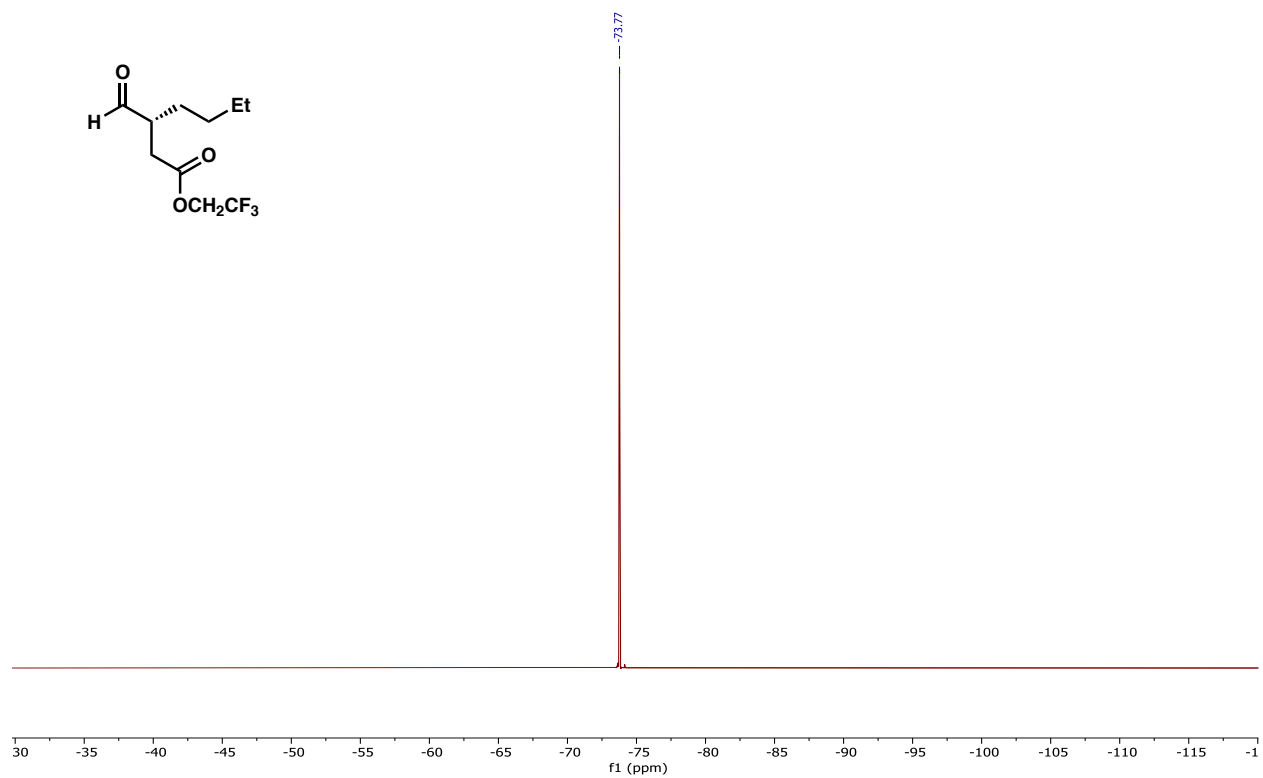

**(R)-2-Butylbutane-1,4-diyl dibenzoate, 13ba:**

**<sup>1</sup>H NMR (400 MHz, CDCl<sub>3</sub>)**

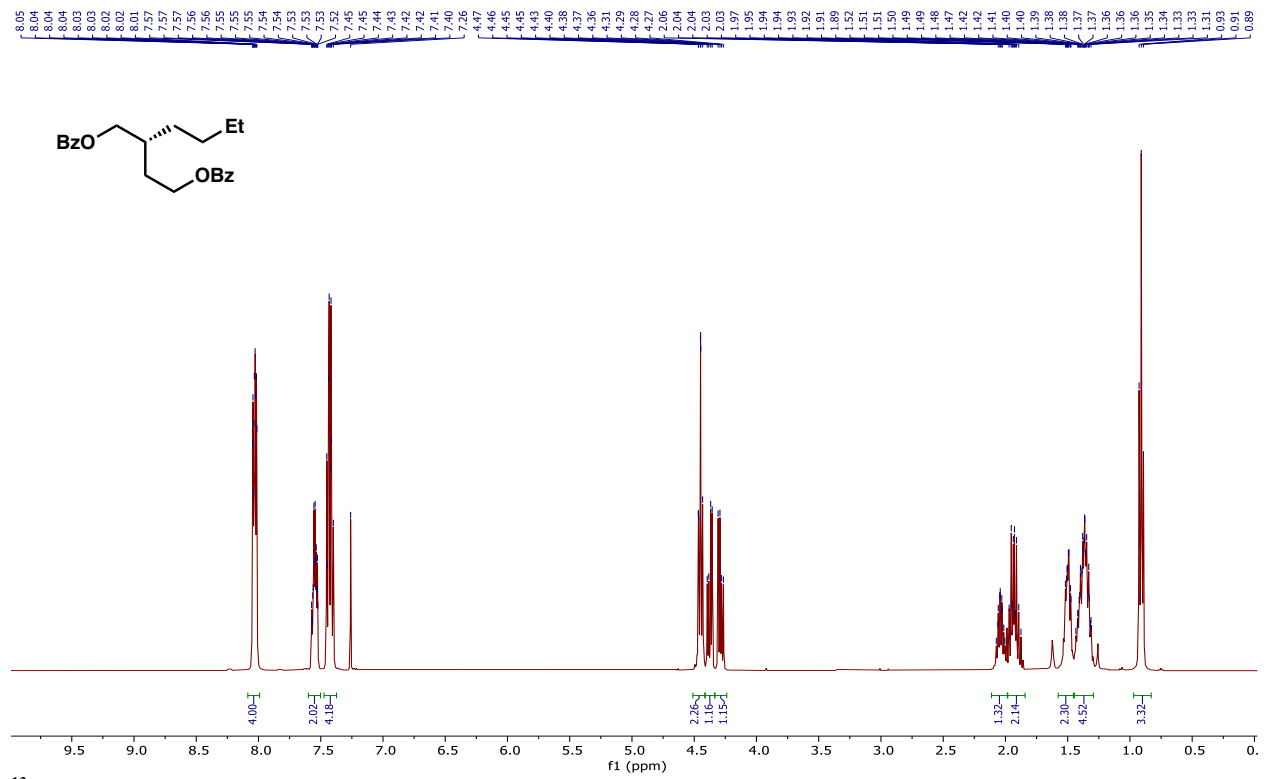

**<sup>13</sup>C NMR (101 MHz, CDCl<sub>3</sub>)**

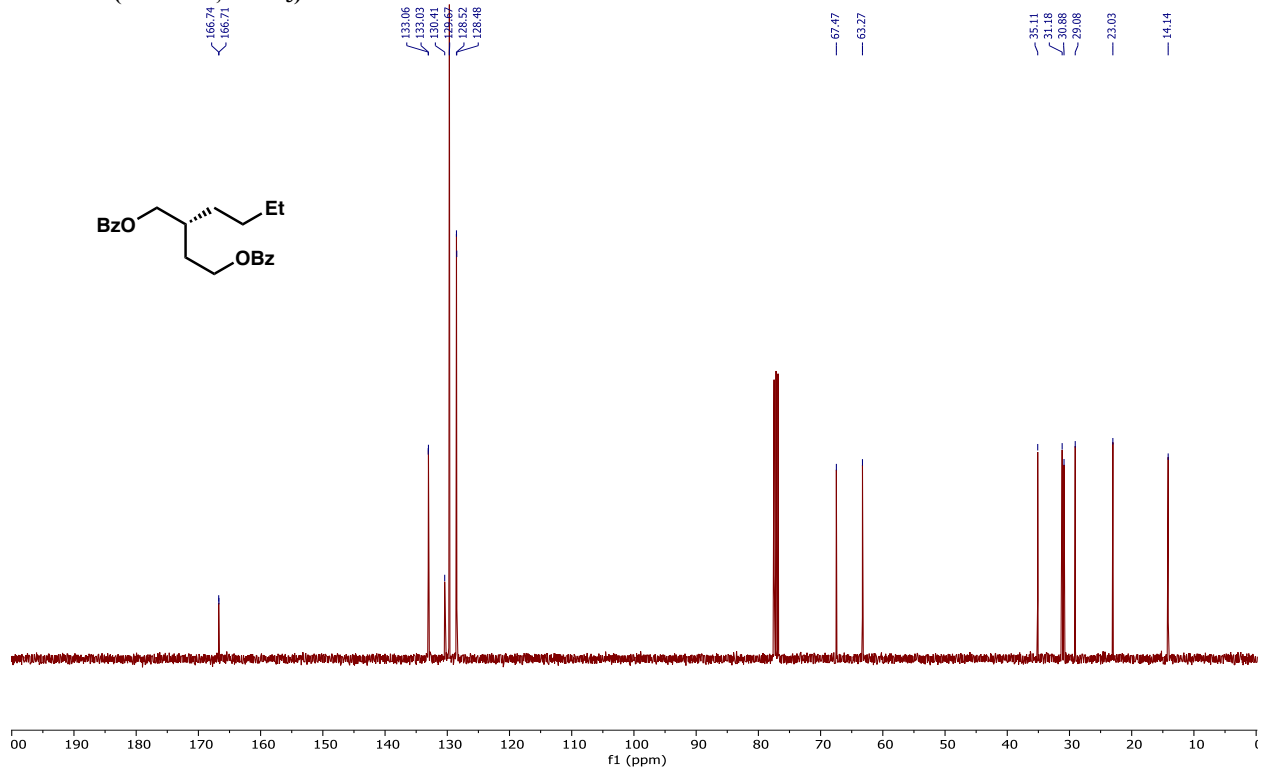

# 2,2,2-Trifluoroethyl (S)-3-formyl-4-methylpentanoate, 13c:

<sup>1</sup>H NMR (600 MHz, C<sub>6</sub>D<sub>6</sub>)

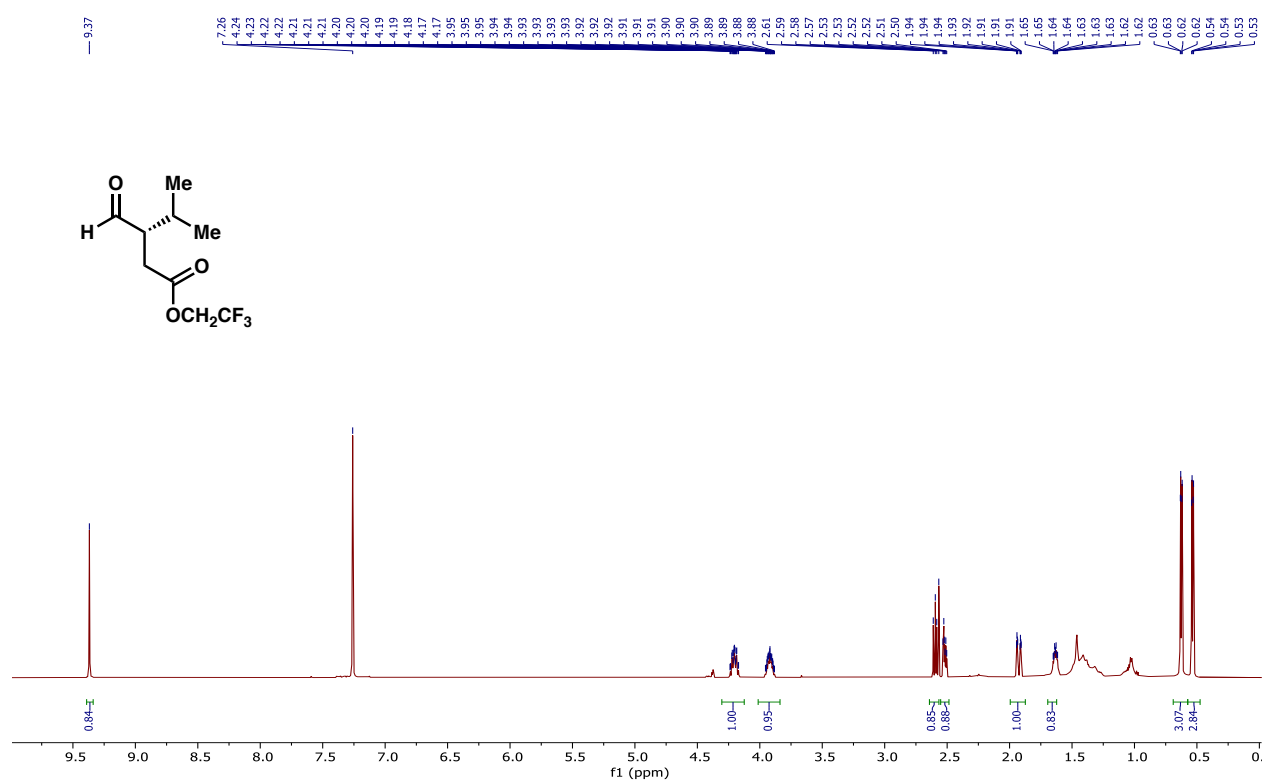

<sup>13</sup>C NMR (151 MHz, C<sub>6</sub>D<sub>6</sub>)

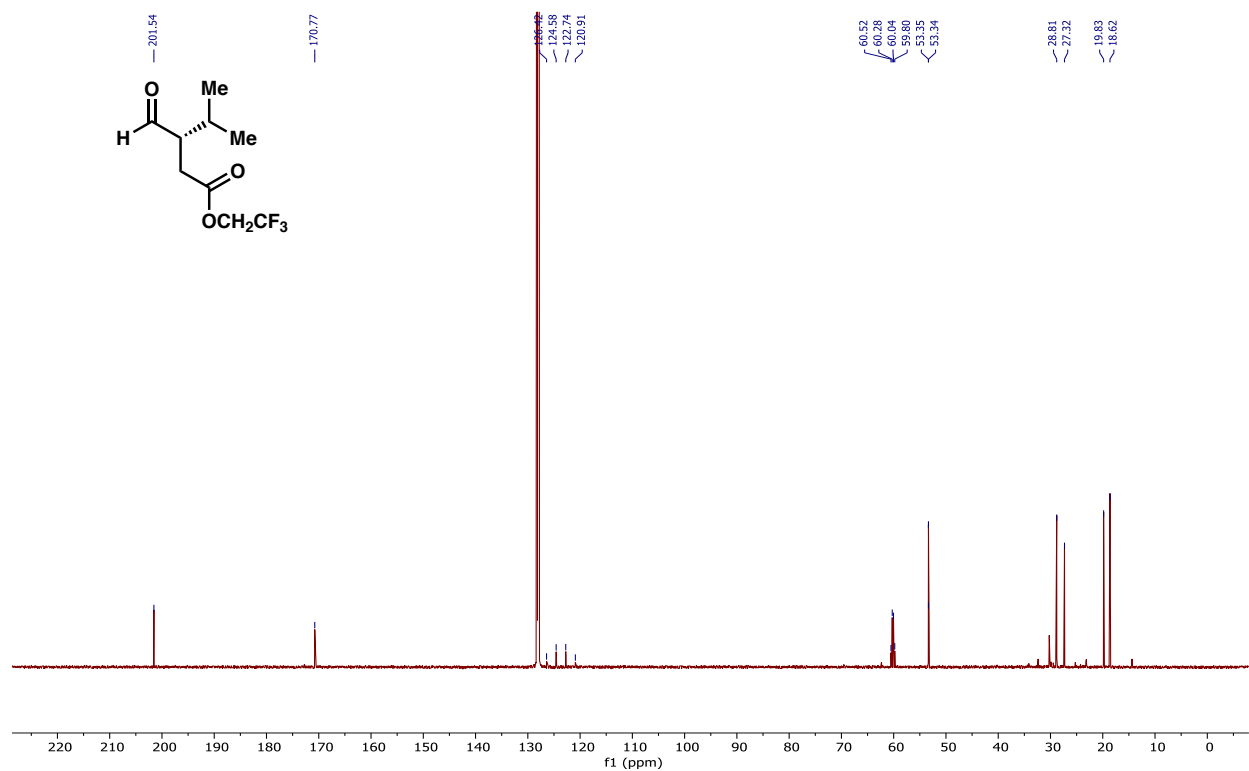

**<sup>19</sup>F NMR (600 MHz, C<sub>6</sub>D<sub>6</sub>)**

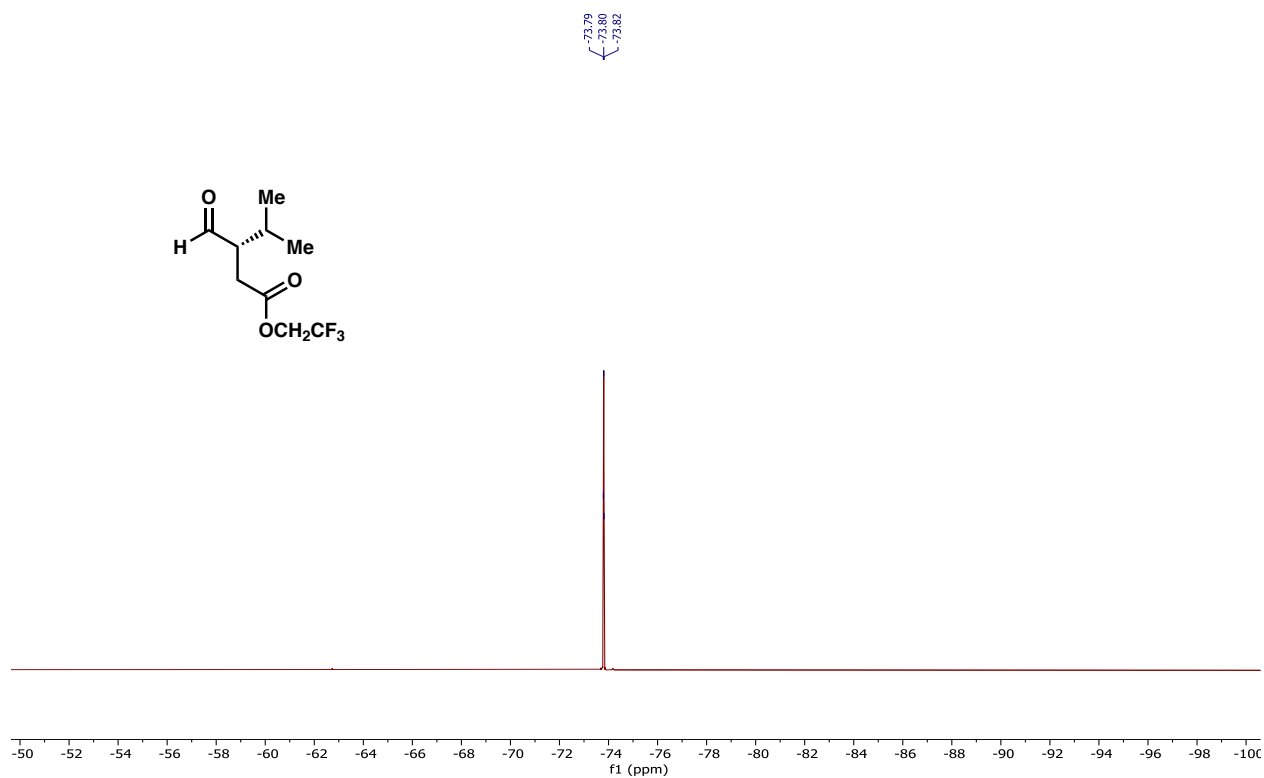

**(S)-2-Isopropylbutane-1,4-diyl dibenzoate, 13ca:**

**<sup>1</sup>H NMR (600 MHz, CDCl<sub>3</sub>)**

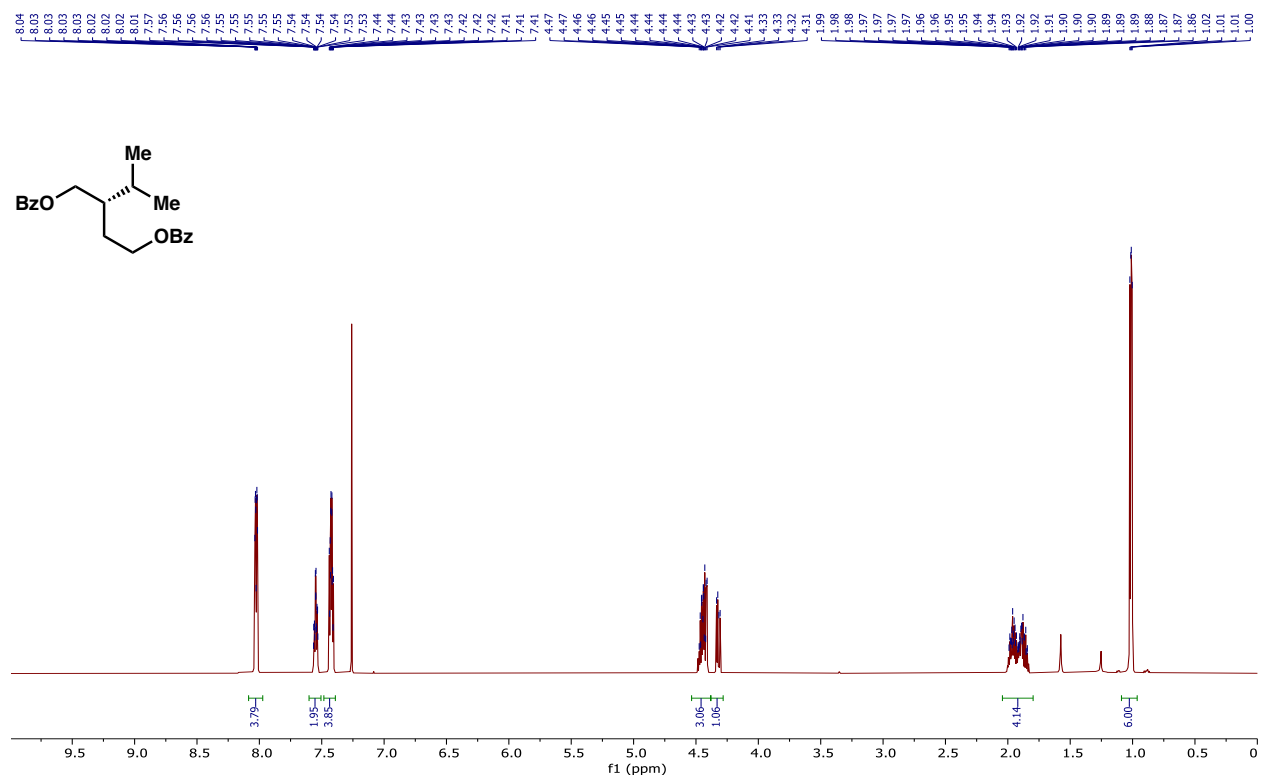

<sup>13</sup>C NMR (151 MHz, CDCl<sub>3</sub>)

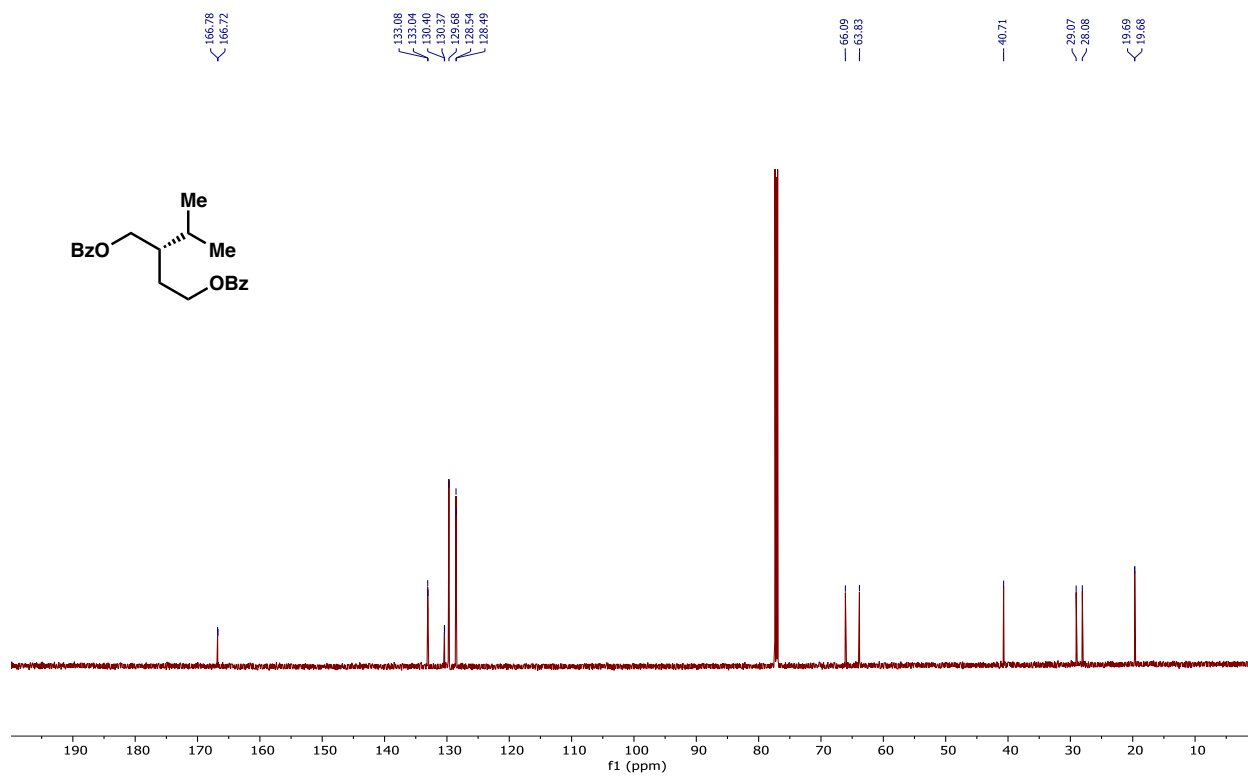

2,2,2-Trifluoroethyl (*S*)-3-cyclohexyl-4-oxobutanoate, 13d:

<sup>1</sup>H NMR (600 MHz, C<sub>6</sub>D<sub>6</sub>)

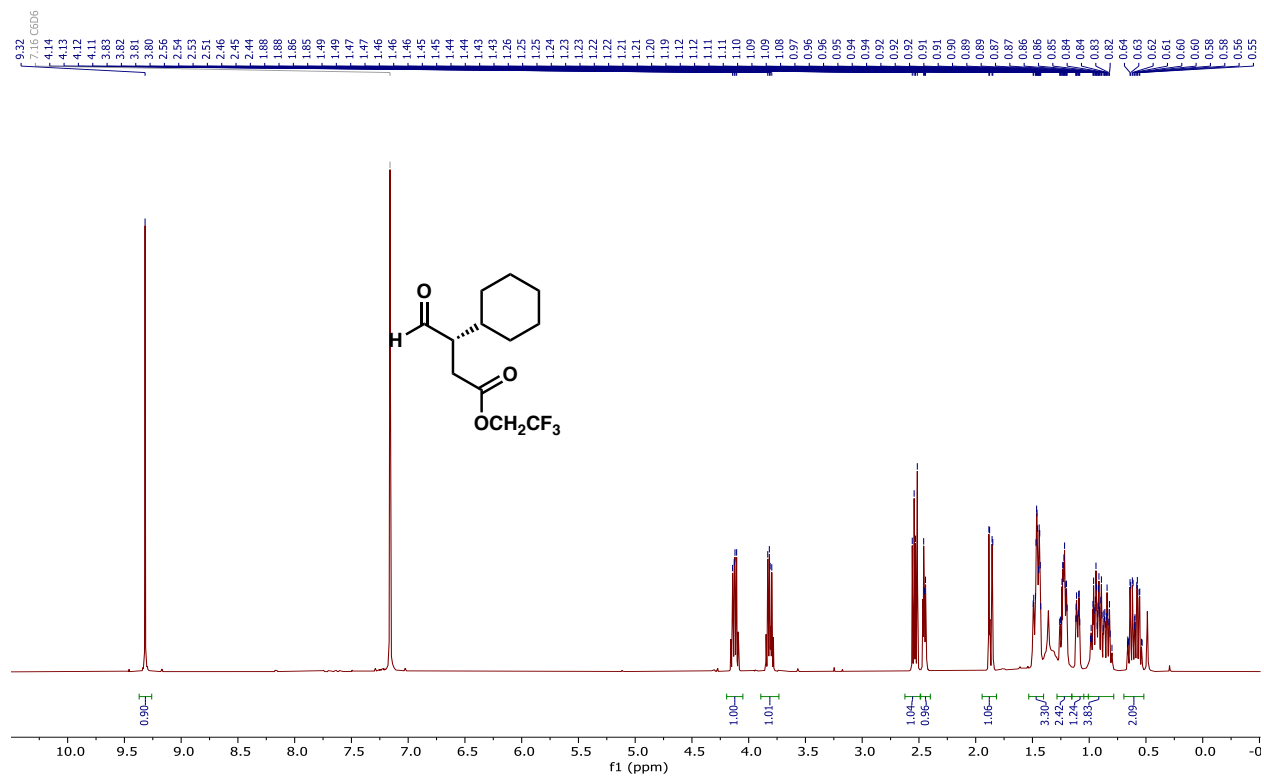



**$^{13}\text{C}$  NMR (151 MHz,  $\text{C}_6\text{D}_6$ )**

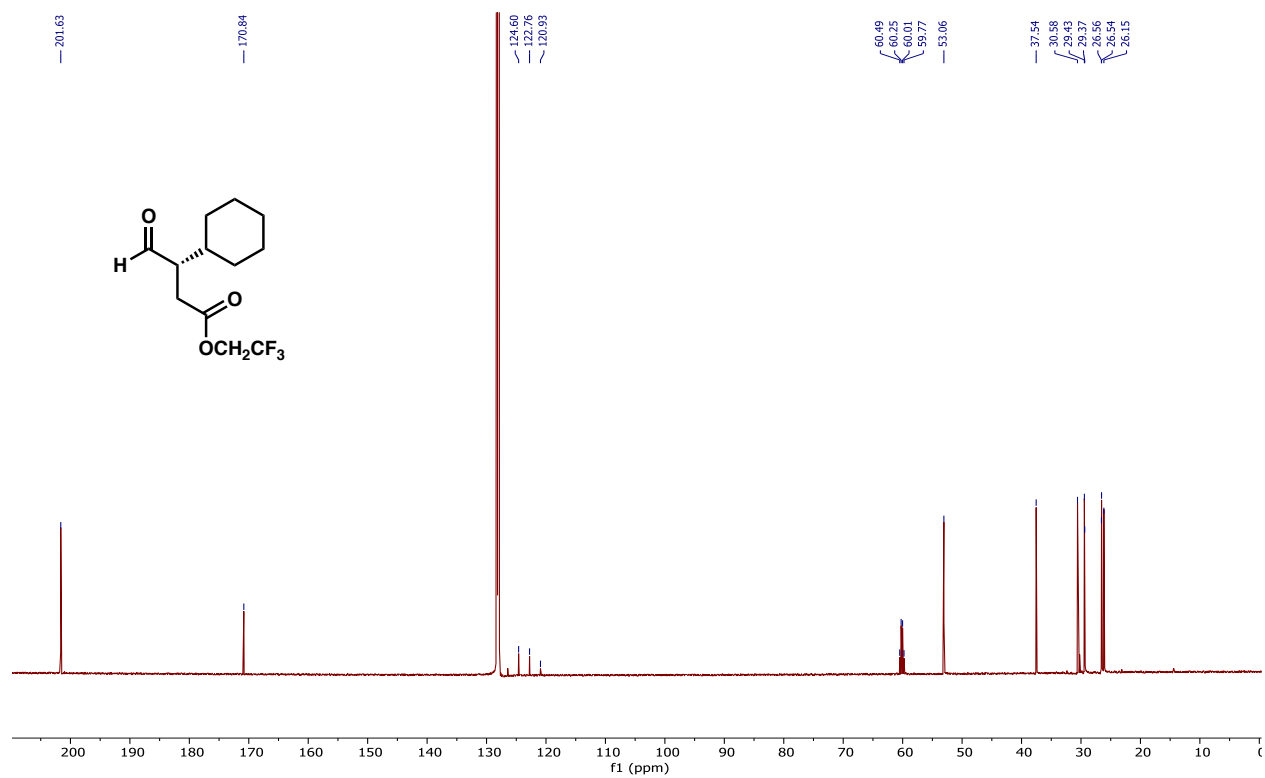

**$^{19}\text{F}$  NMR (565 MHz,  $\text{C}_6\text{D}_6$ )**

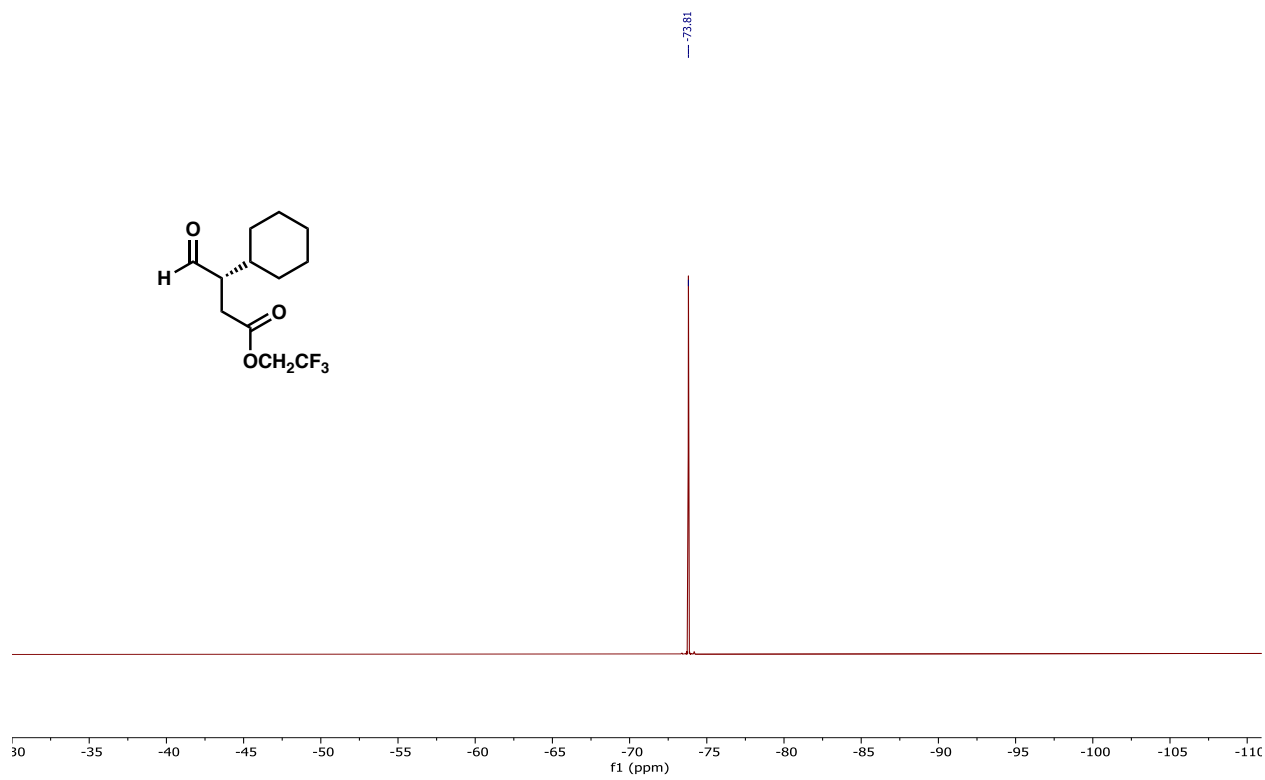

**(S)-2-Cyclohexylbutane-1,4-diyl dibenzoate, 13da:**

**<sup>1</sup>H NMR (600 MHz, CDCl<sub>3</sub>)**

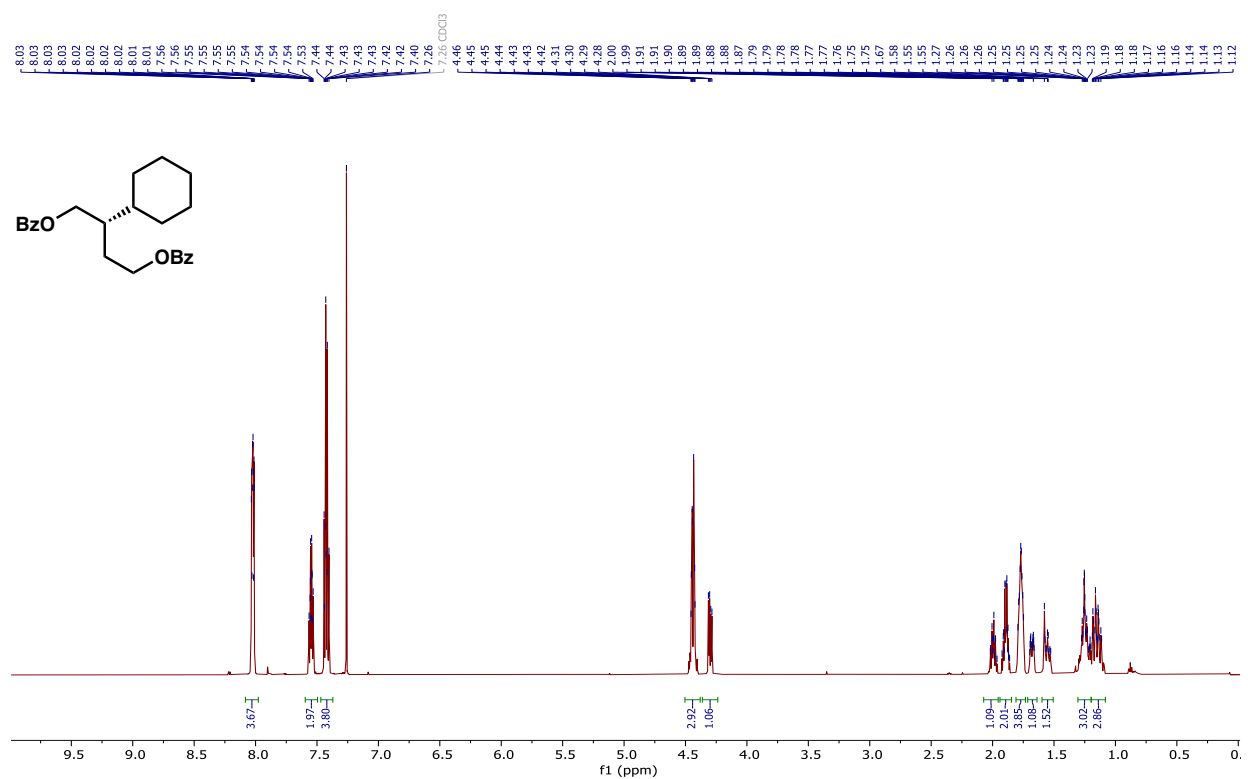

**<sup>13</sup>C NMR (151 MHz, CDCl<sub>3</sub>)**

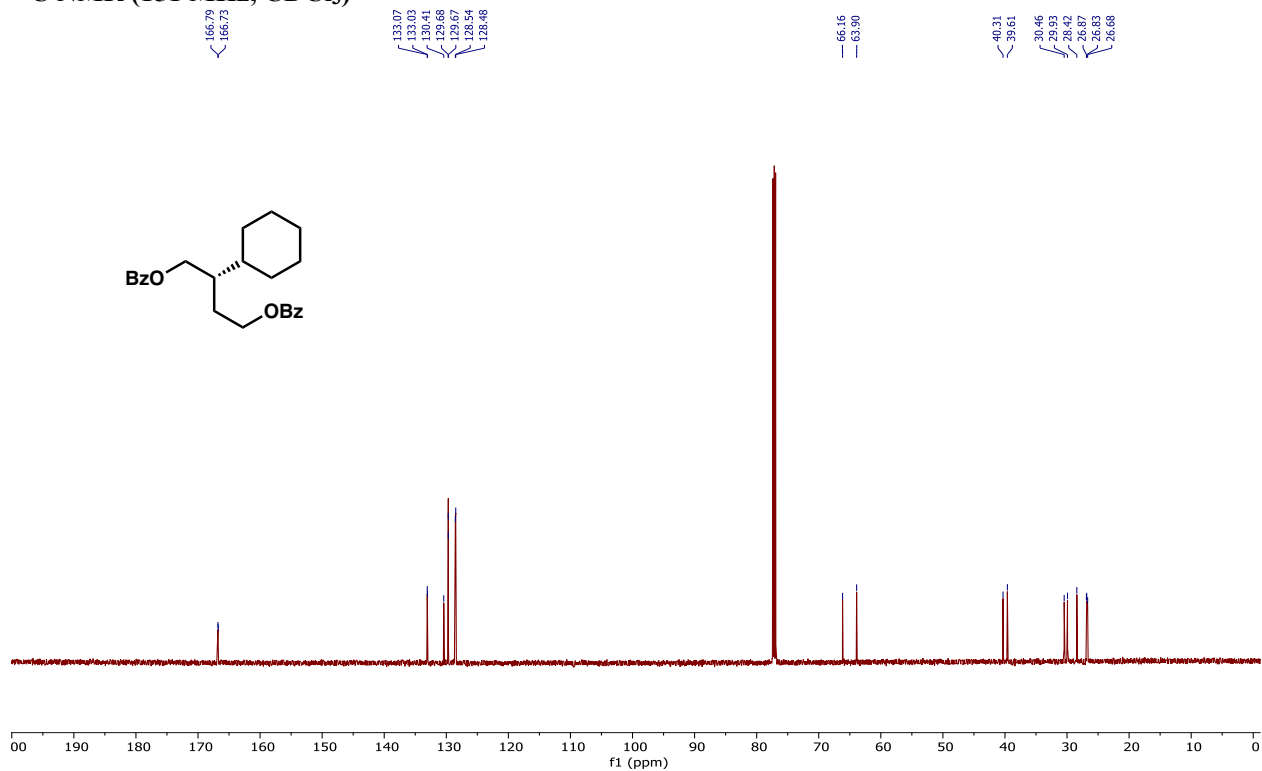

# 2,2,2-Trifluoroethyl (S)-4-(((benzyloxy)carbonyl)amino)-3-formylbutanoate, 13f:

$^1\text{H}$  NMR (600 MHz,  $\text{CDCl}_3$ )

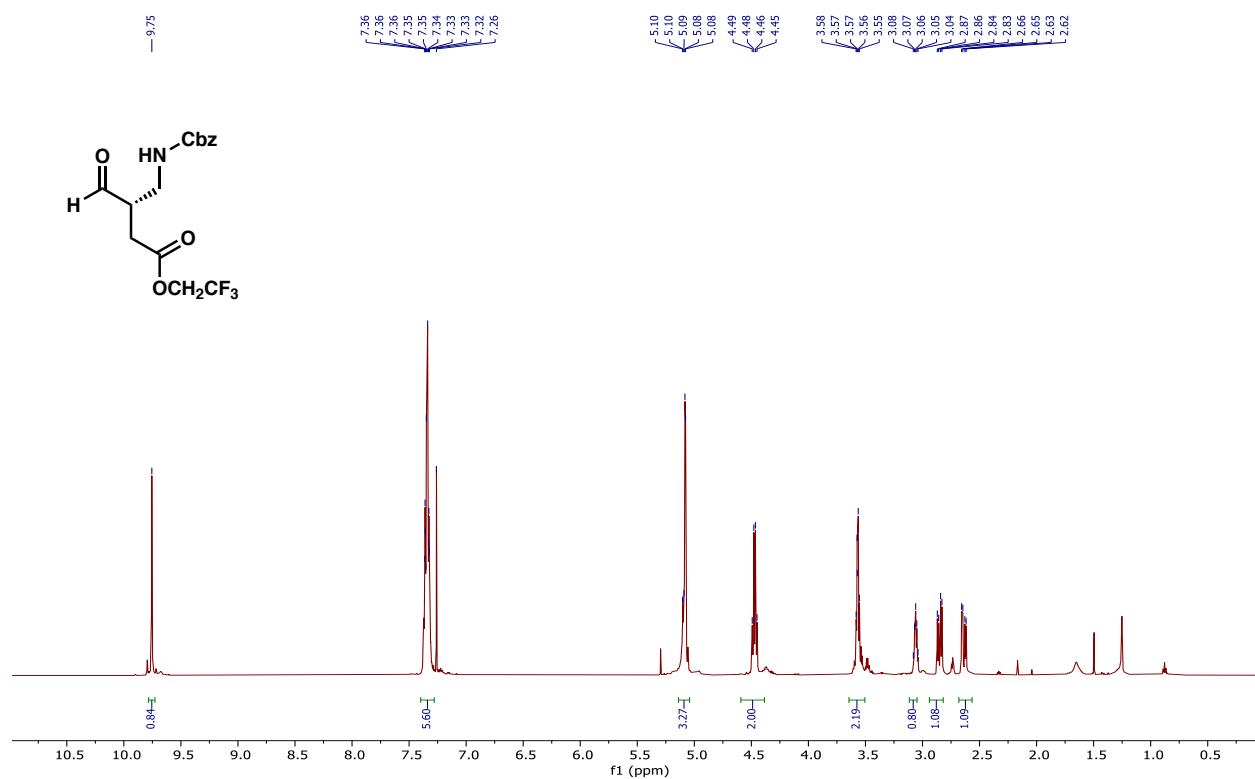

$^{13}\text{C}$  NMR (151 MHz,  $\text{CDCl}_3$ )

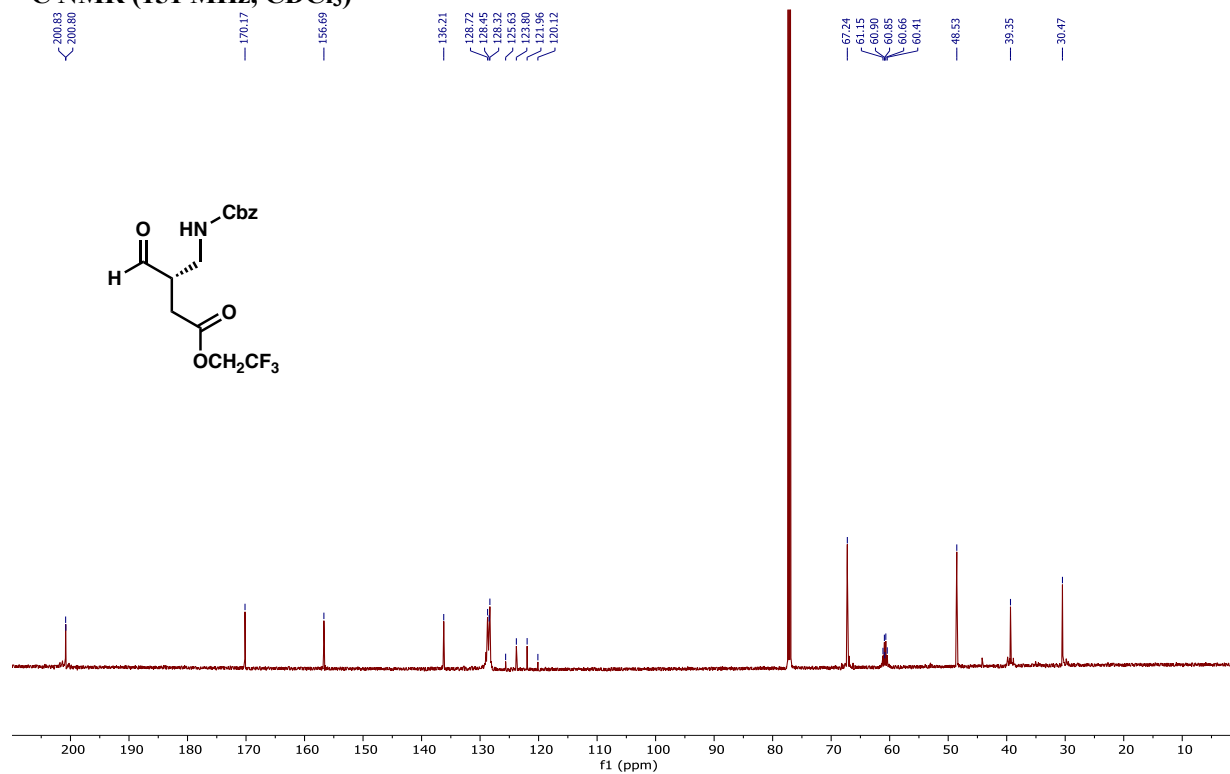

**$^{19}\text{F}$  NMR (565 MHz,  $\text{CDCl}_3$ )**

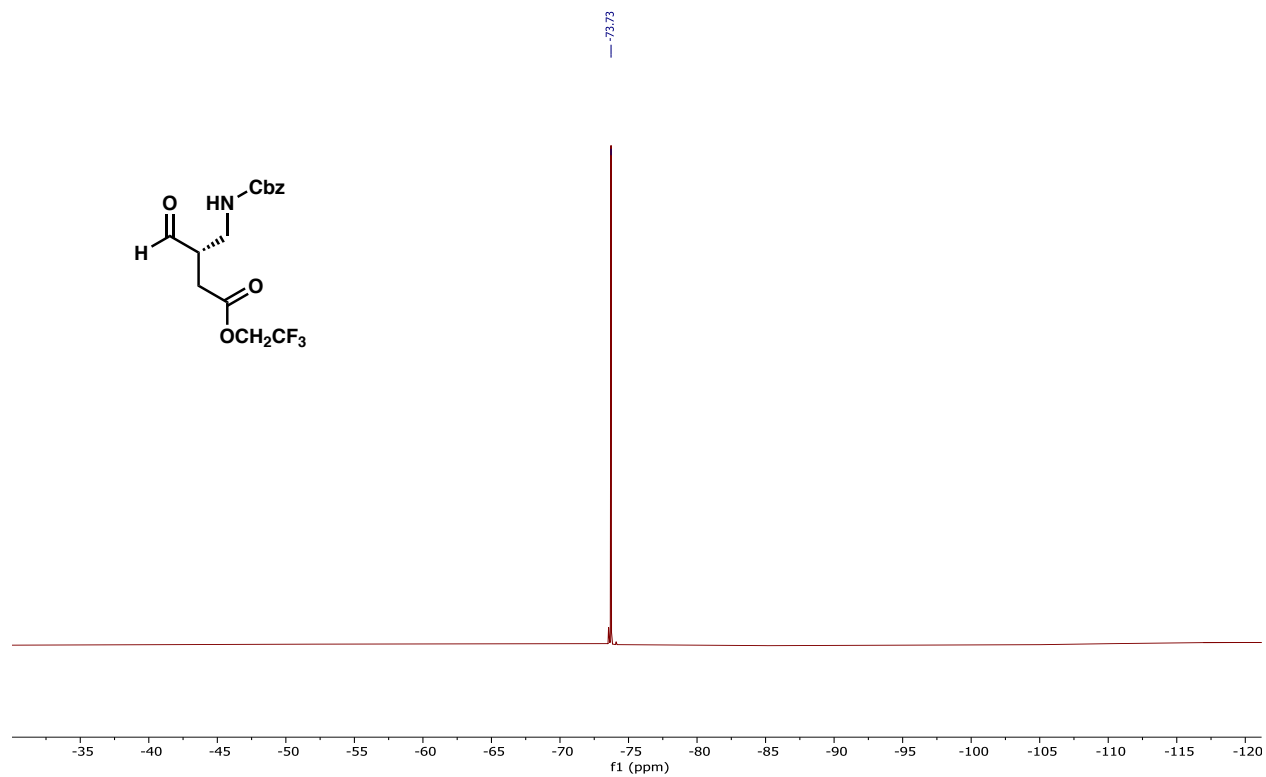

**Benzyl (*S*)-((5-oxotetrahydrofuran-3-yl)methyl)carbamate, 13fa:**

**$^1\text{H}$  NMR (600 MHz,  $\text{CDCl}_3$ )**

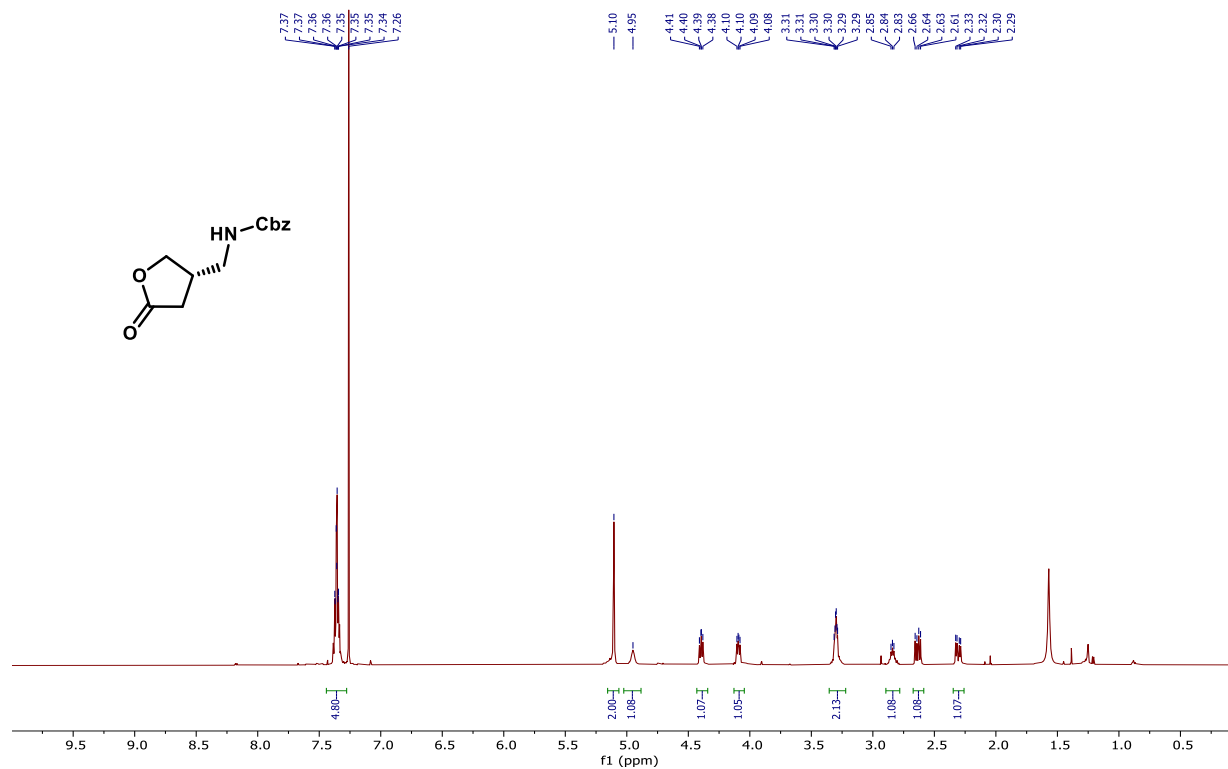

<sup>13</sup>C NMR (151 MHz, CDCl<sub>3</sub>)

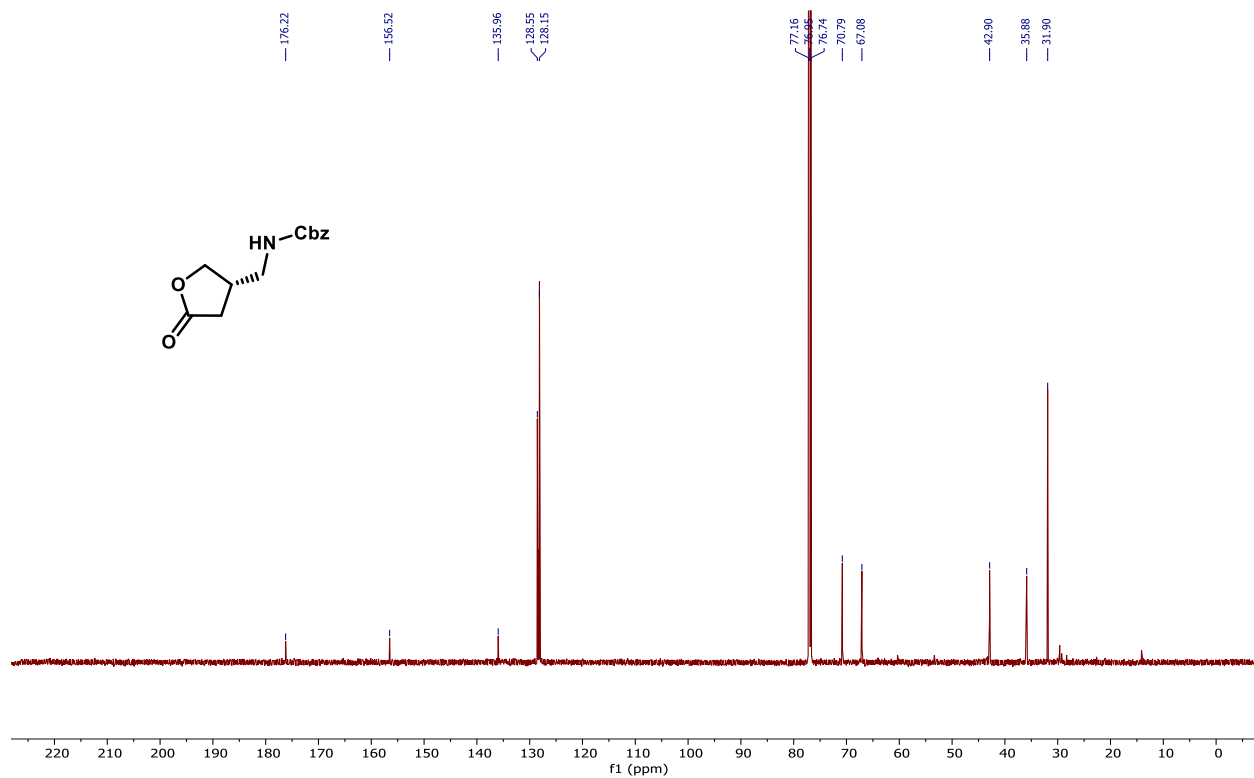

2,2,2-Trifluoroethyl (3R)-3-benzyl-2-methyl-4-oxobutanoate, 13g:

<sup>1</sup>H NMR (600 MHz, CDCl<sub>3</sub>)

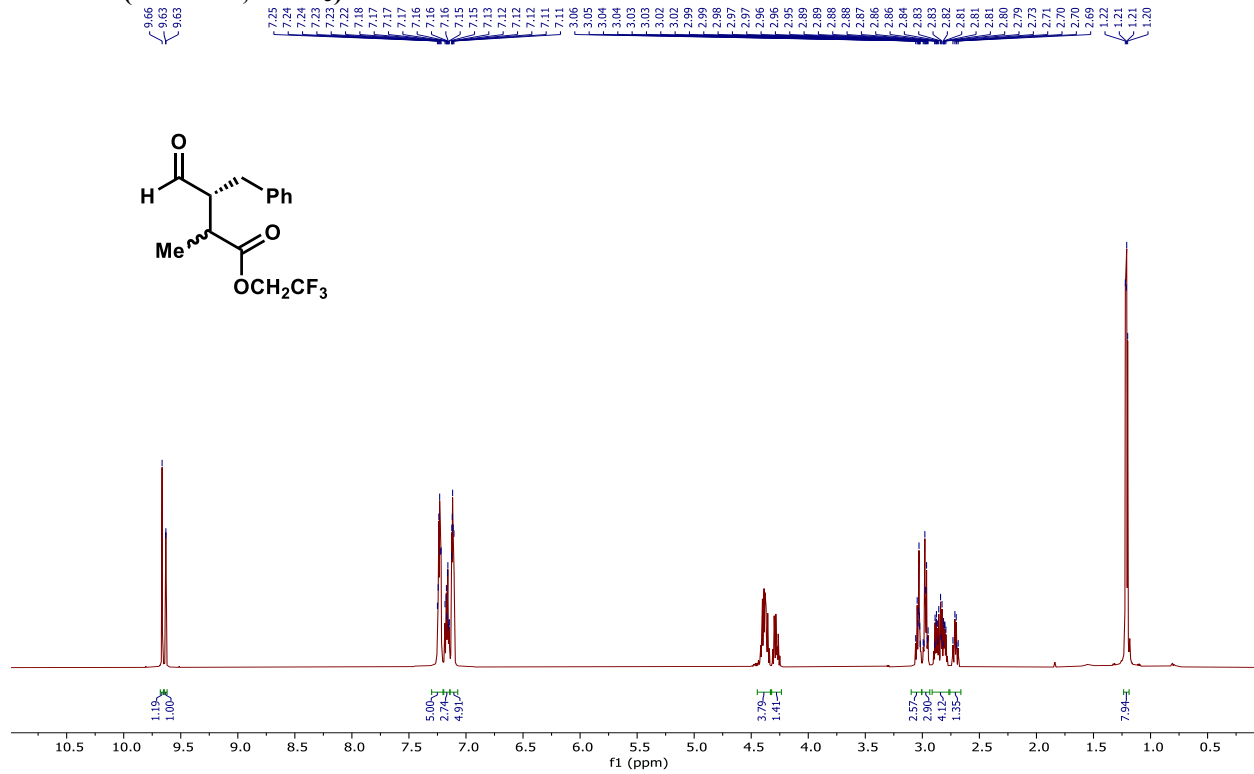

### <sup>13</sup>C NMR (151 MHz, CDCl<sub>3</sub>)

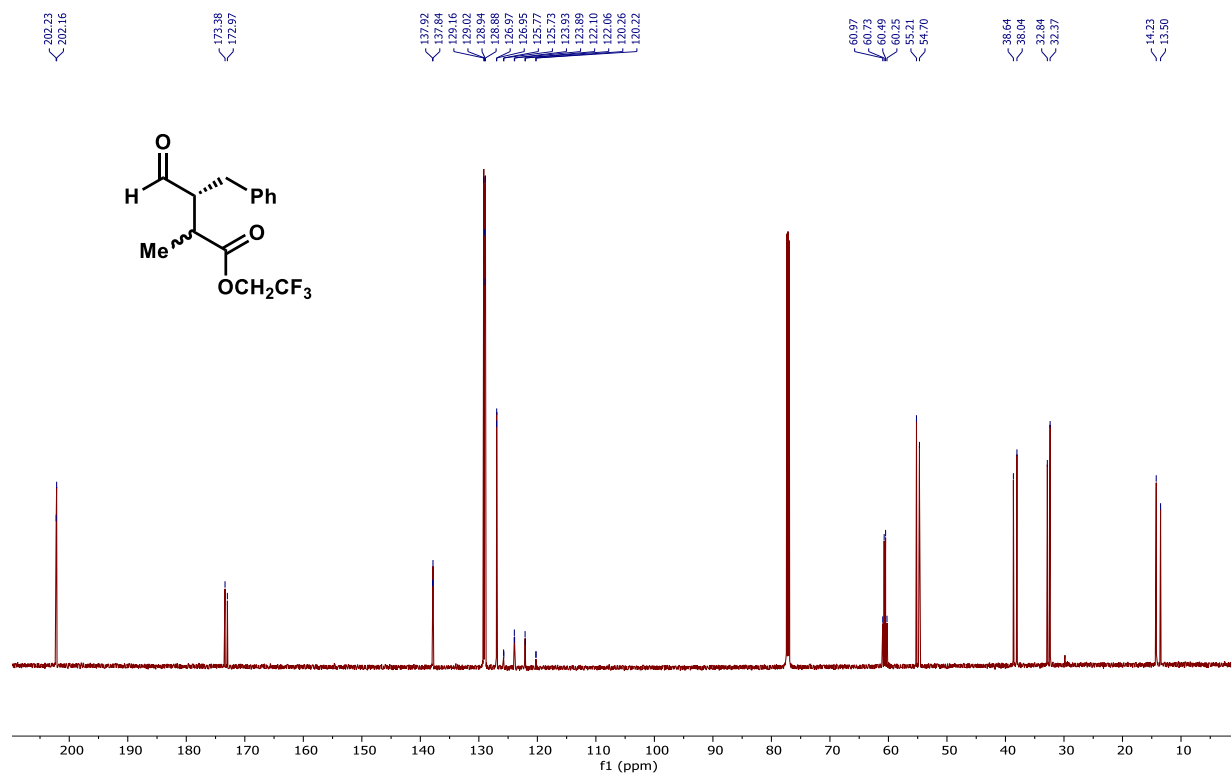

### <sup>19</sup>F NMR (565 MHz, CDCl<sub>3</sub>)

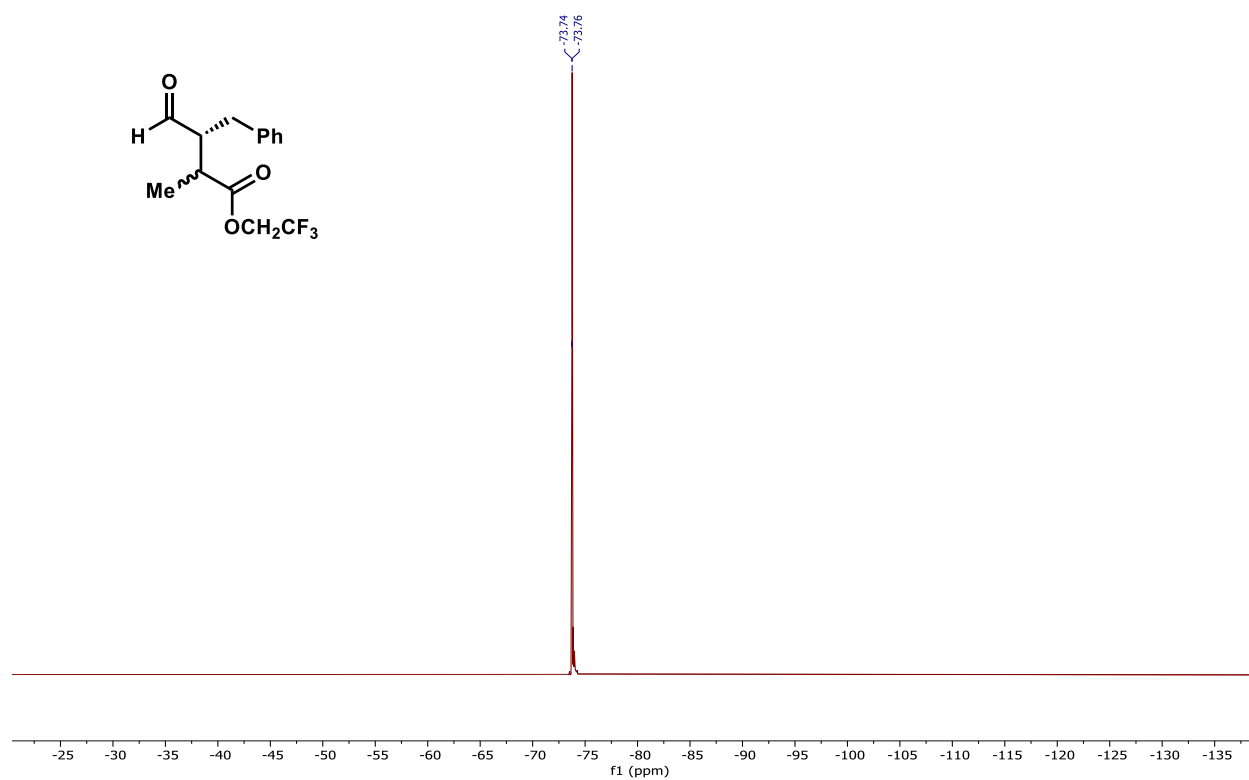

(2R)-2-Benzyl-3-methylbutane-1,4-diyl dibenzoate, 13ga:

<sup>1</sup>H NMR (600 MHz, CDCl<sub>3</sub>)

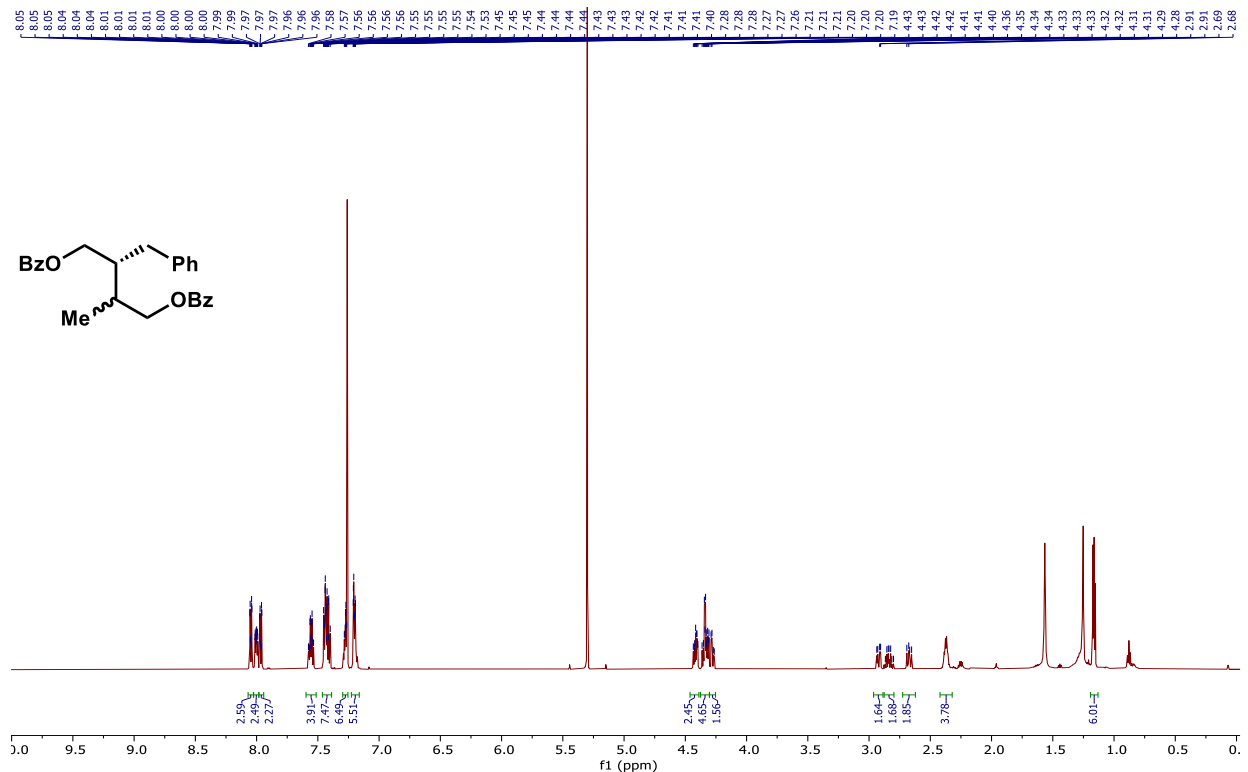

<sup>13</sup>C NMR (151 MHz, CDCl<sub>3</sub>)

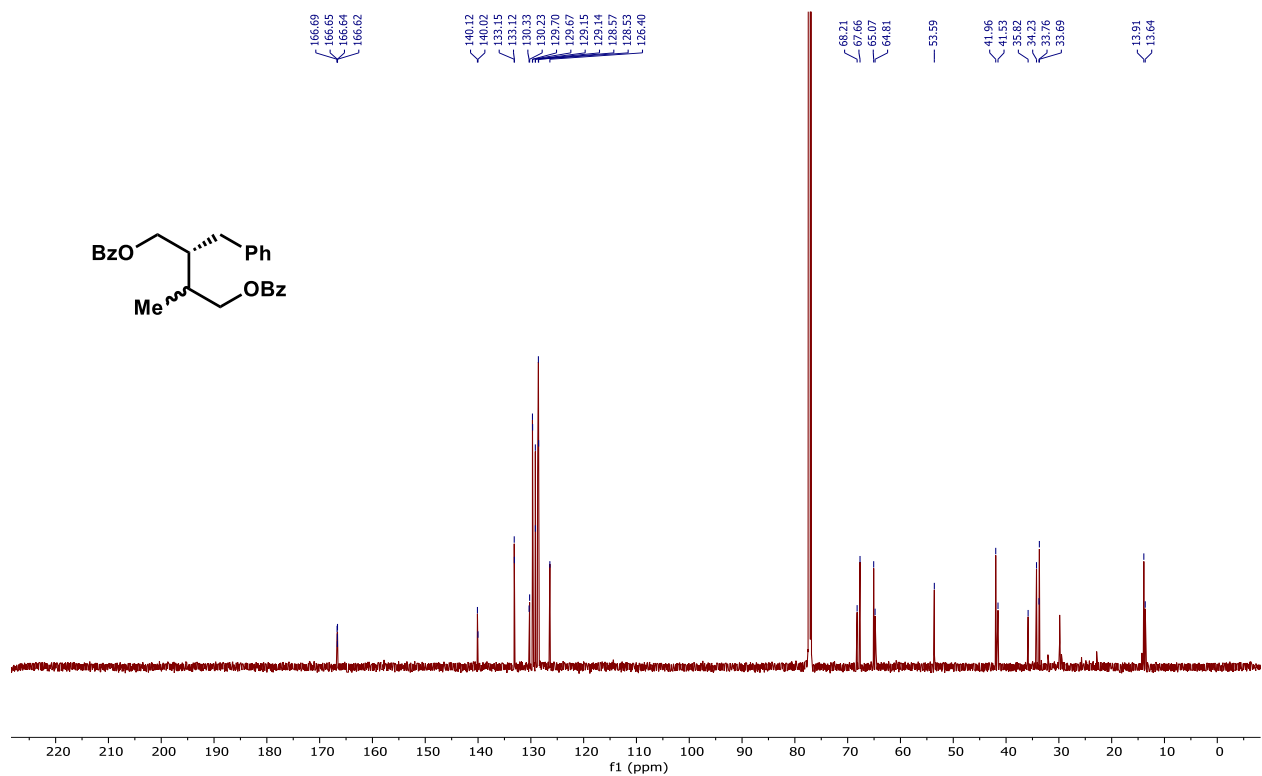

**2,2,2-Trifluoroethyl (3R)-3-benzyl-2-isopropyl-4-oxobutanoate, 13h:**

<sup>1</sup>H NMR (600 MHz, CDCl<sub>3</sub>)

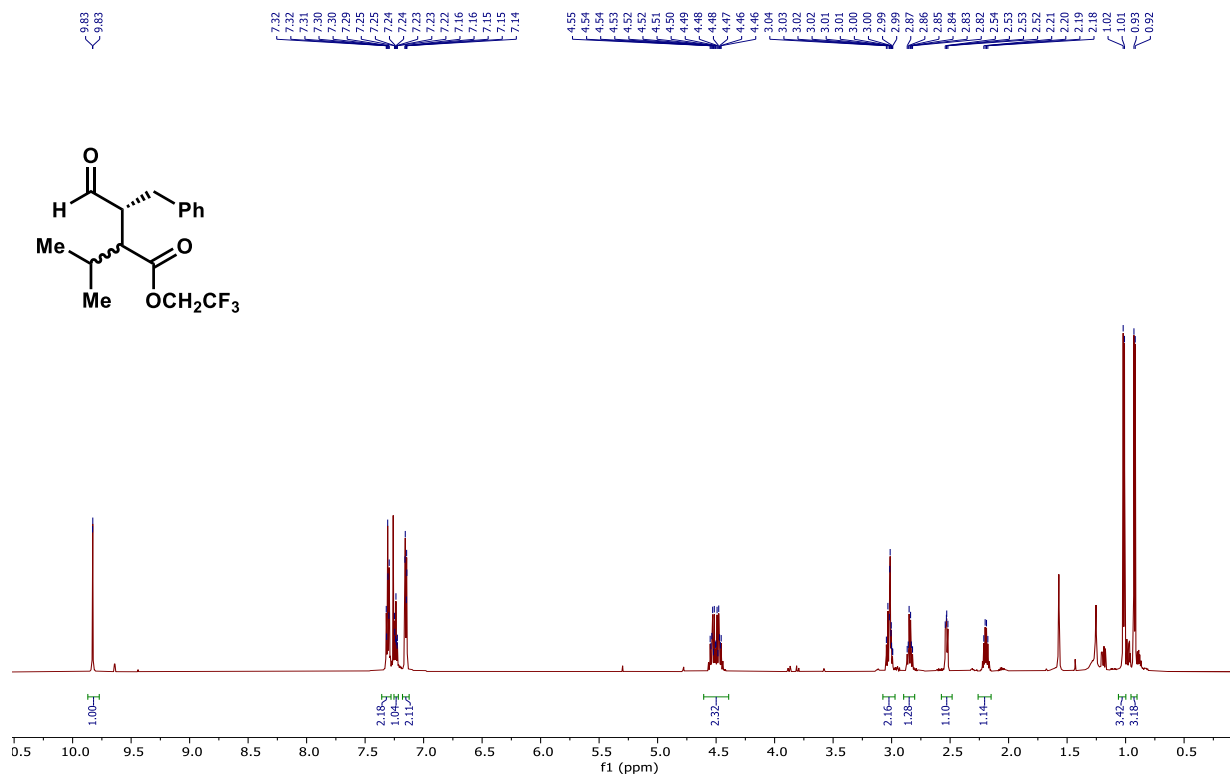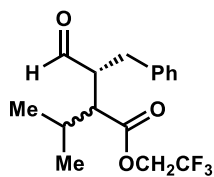

<sup>13</sup>C NMR (151 MHz, CDCl<sub>3</sub>)

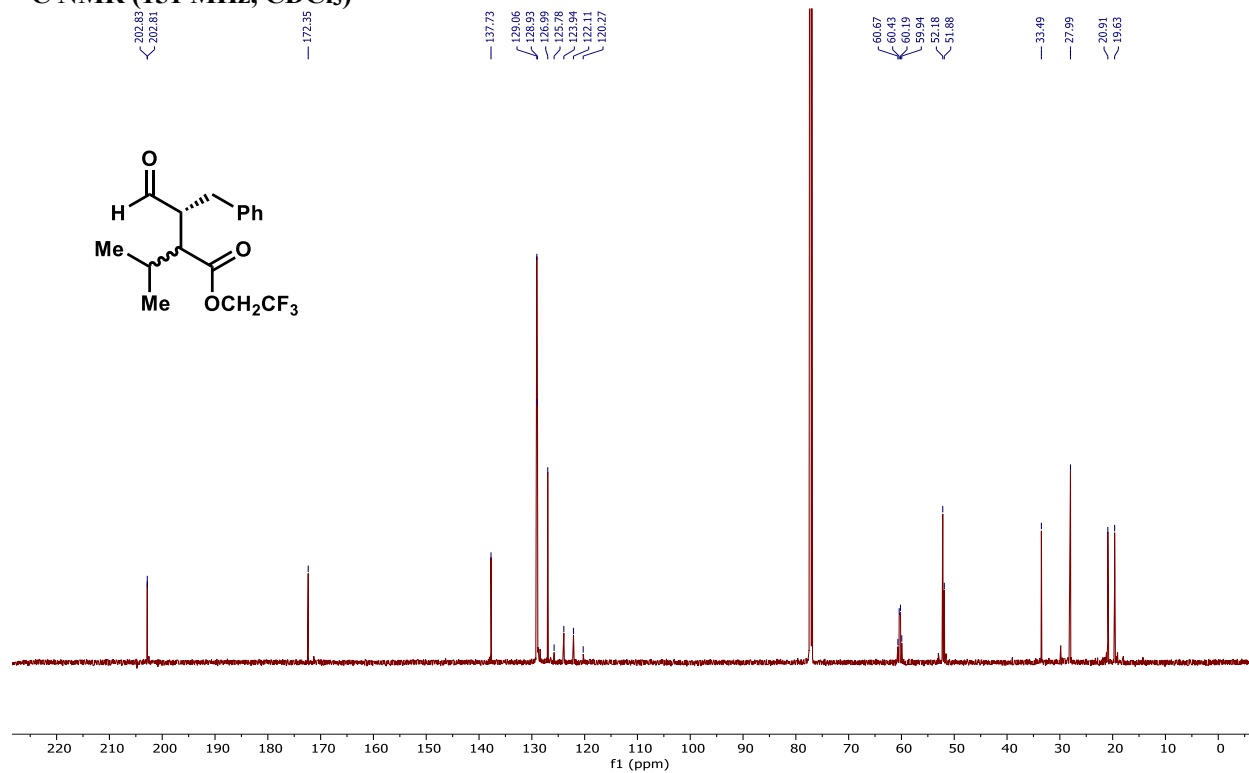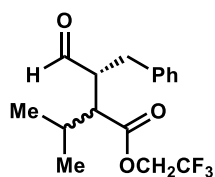



<sup>19</sup>F NMR (565 MHz, CDCl<sub>3</sub>)

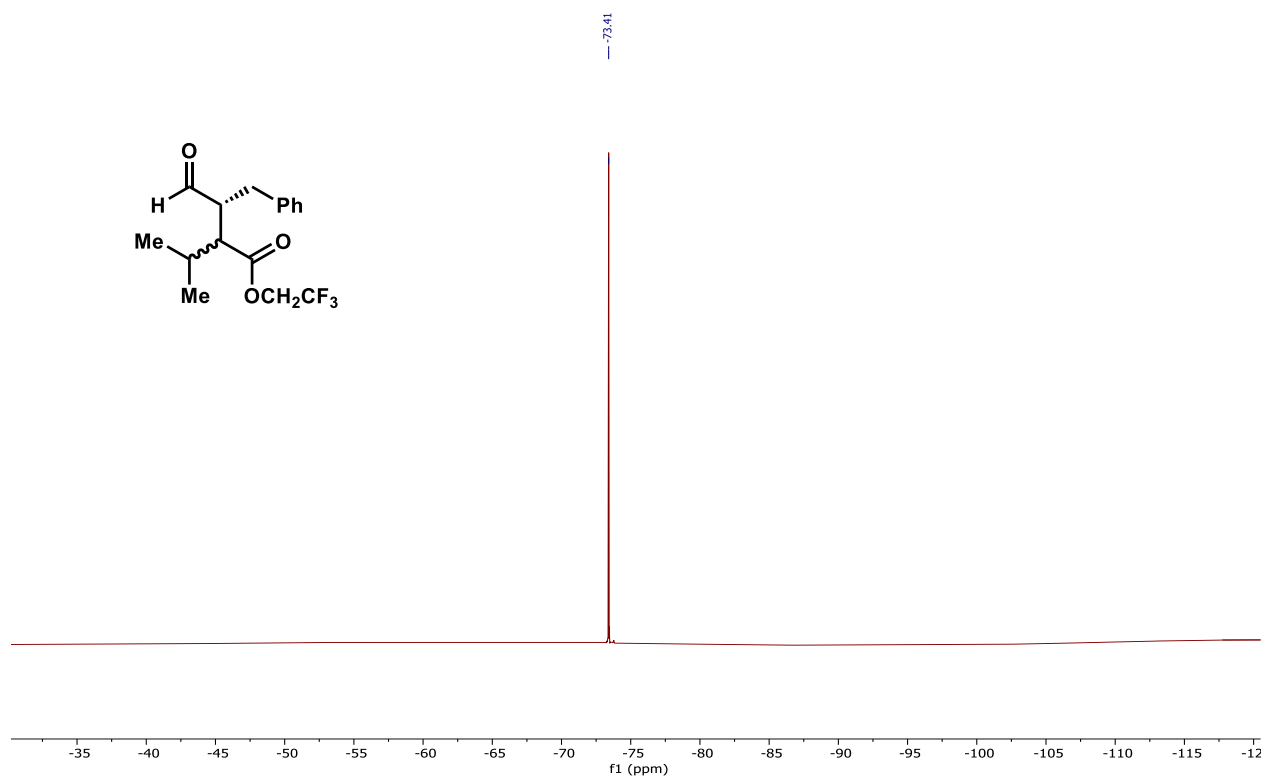

(2R)-2-Benzyl-3-isopropylbutane-1,4-diol dibenzoate, 13ha  
<sup>1</sup>H NMR (400 MHz, CDCl<sub>3</sub>)

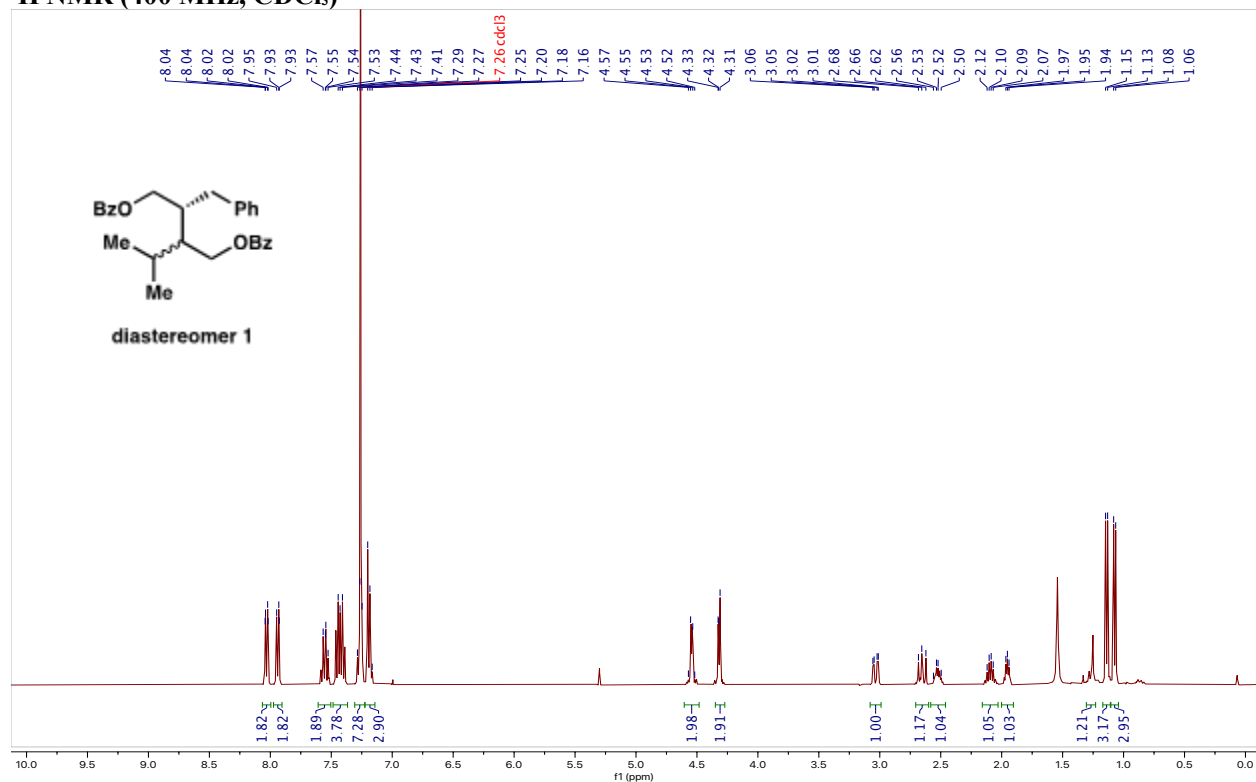

<sup>13</sup>C NMR (151 MHz, CDCl<sub>3</sub>)

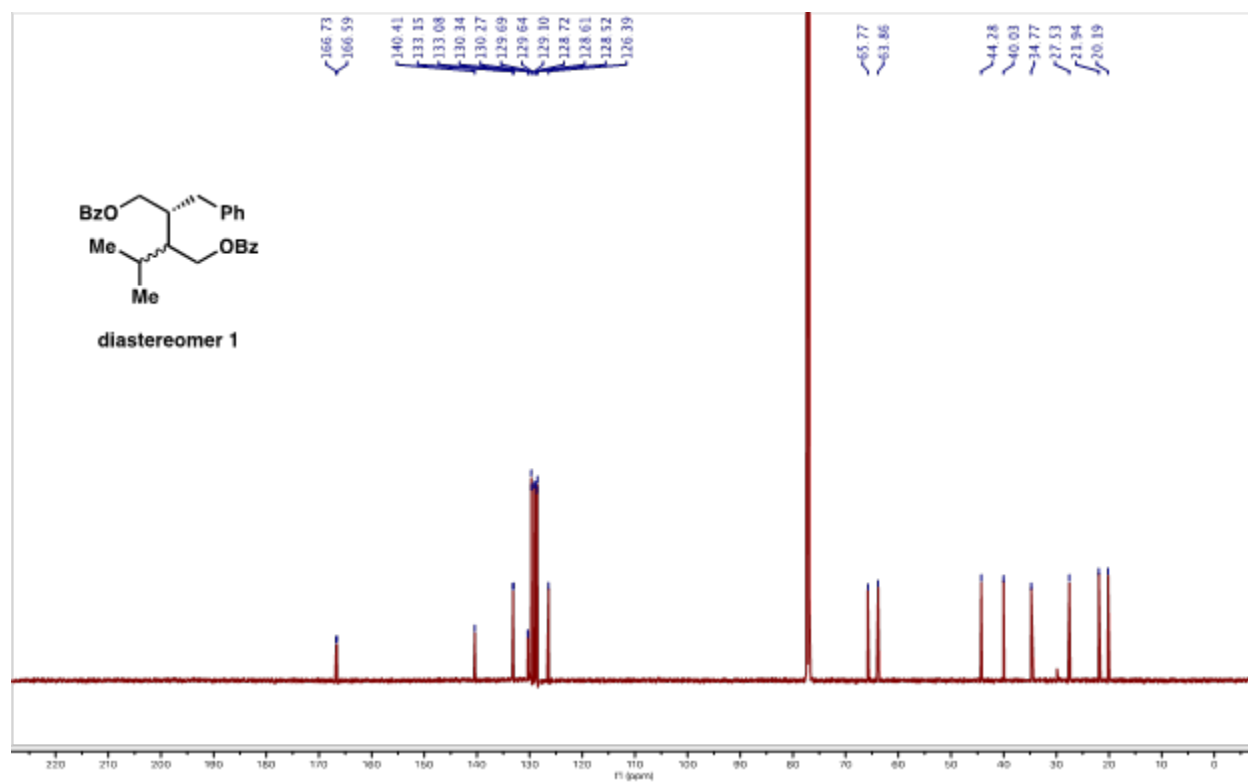

(2*R*)-2-Benzyl-3-isopropylbutane-1,4-diol dibenzoate, 13hb

<sup>1</sup>H NMR (400 MHz, CDCl<sub>3</sub>)

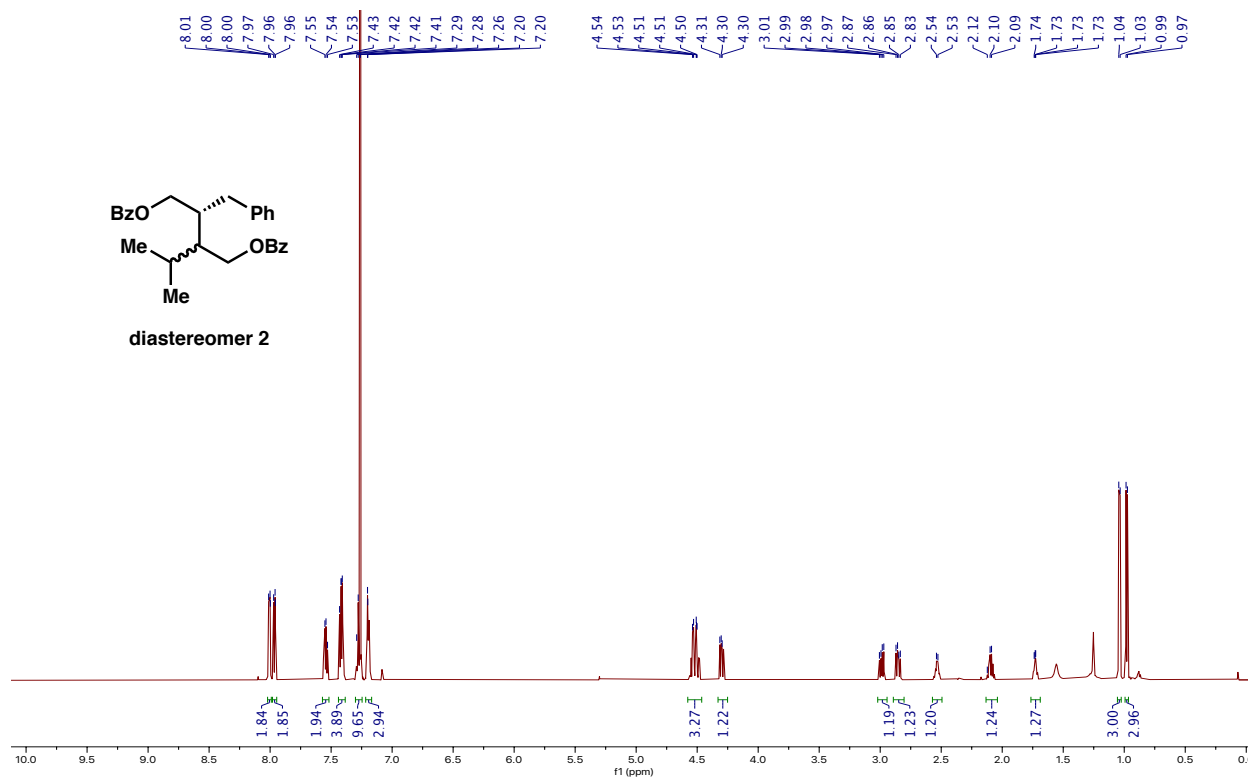

**<sup>13</sup>C NMR (151 MHz, CDCl<sub>3</sub>)**

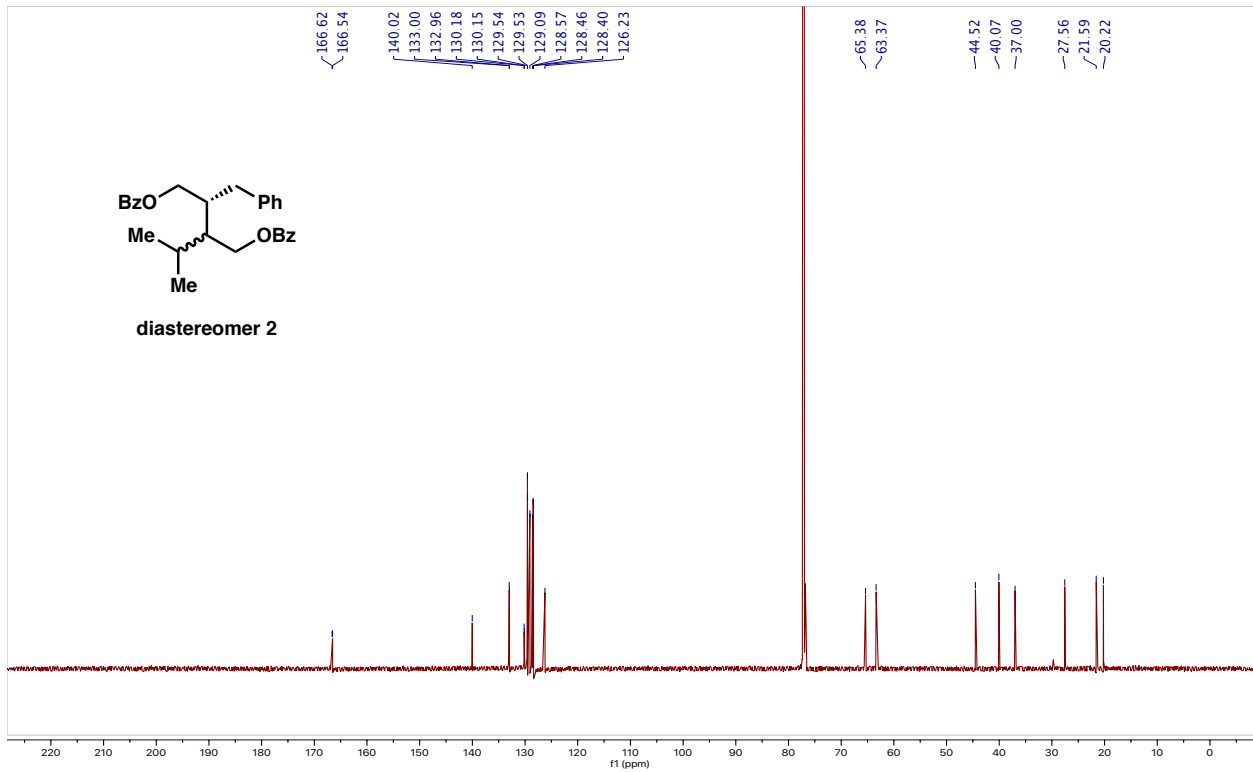

**2,2,2-Trifluoroethyl (3R)-2,3-dibenzyl-4-oxobutanoate, 13i:**

**<sup>1</sup>H NMR (600 MHz, CDCl<sub>3</sub>)**

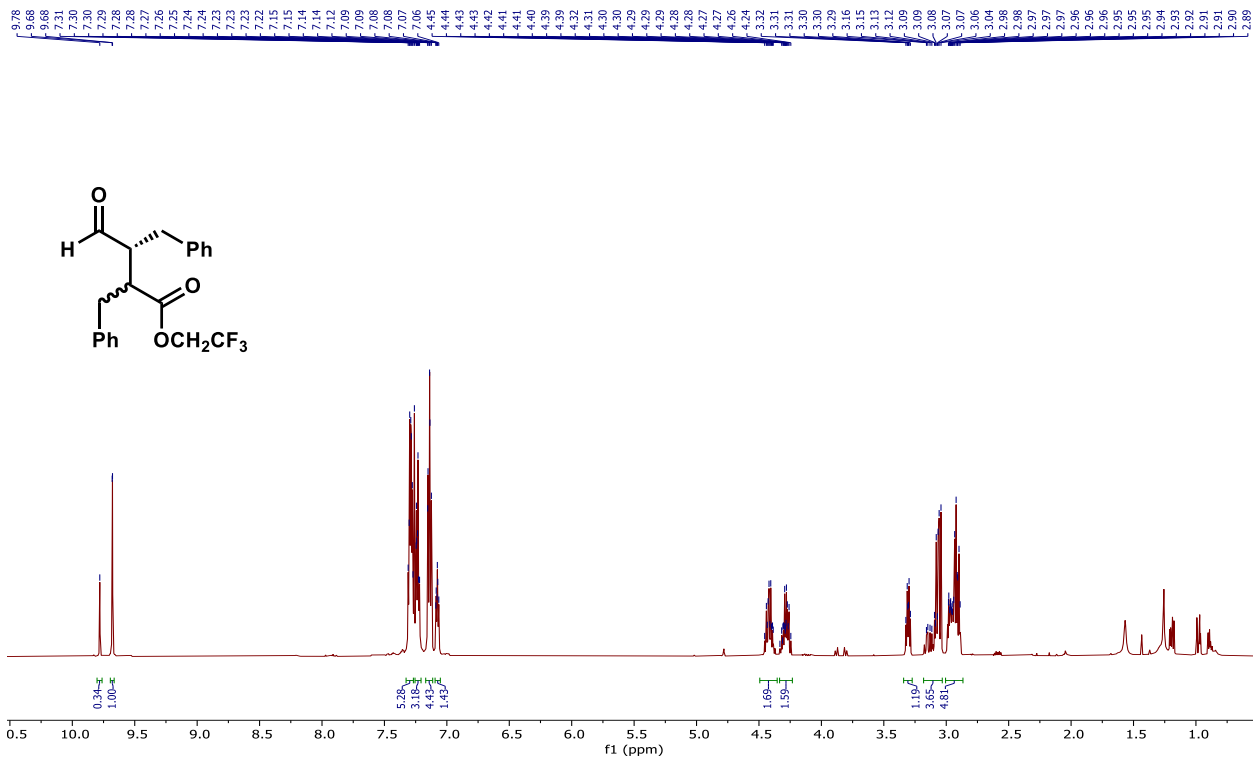

**$^{13}\text{C}$  NMR (151 MHz,  $\text{CDCl}_3$ )**

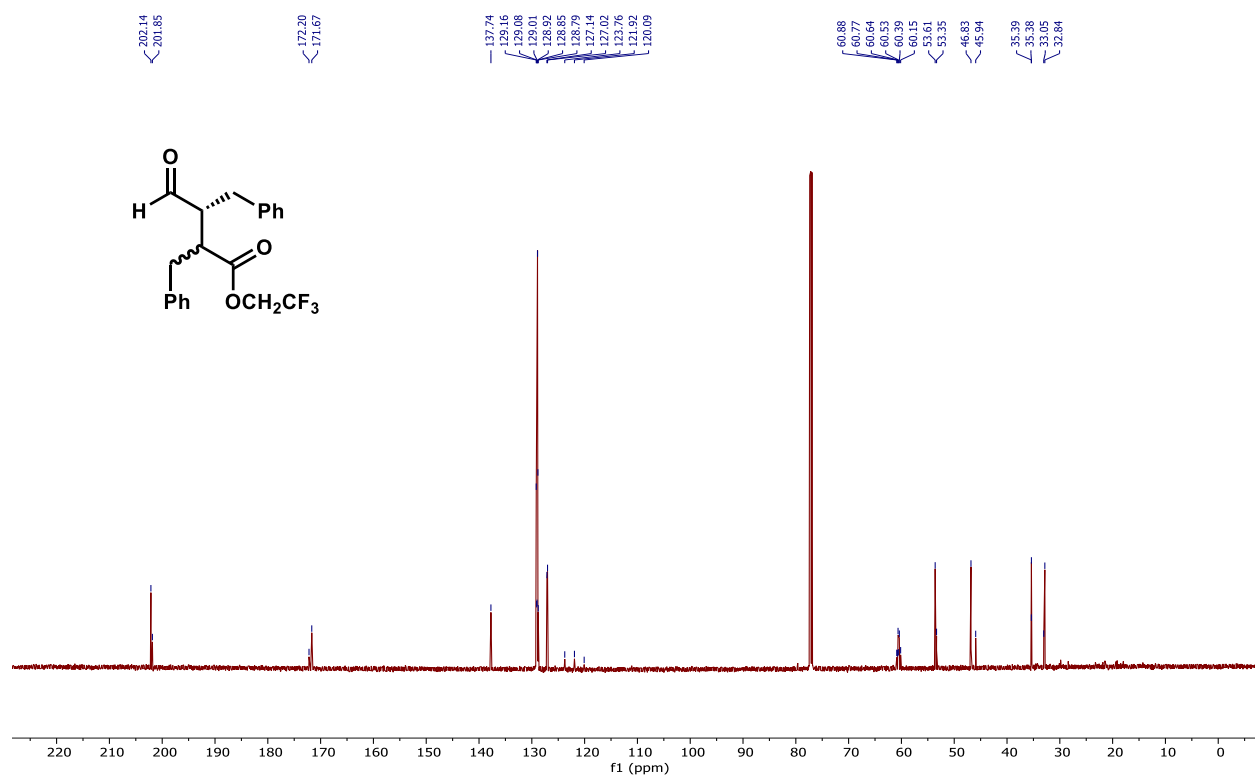

**$^{19}\text{F}$  NMR (565 MHz,  $\text{CDCl}_3$ )**

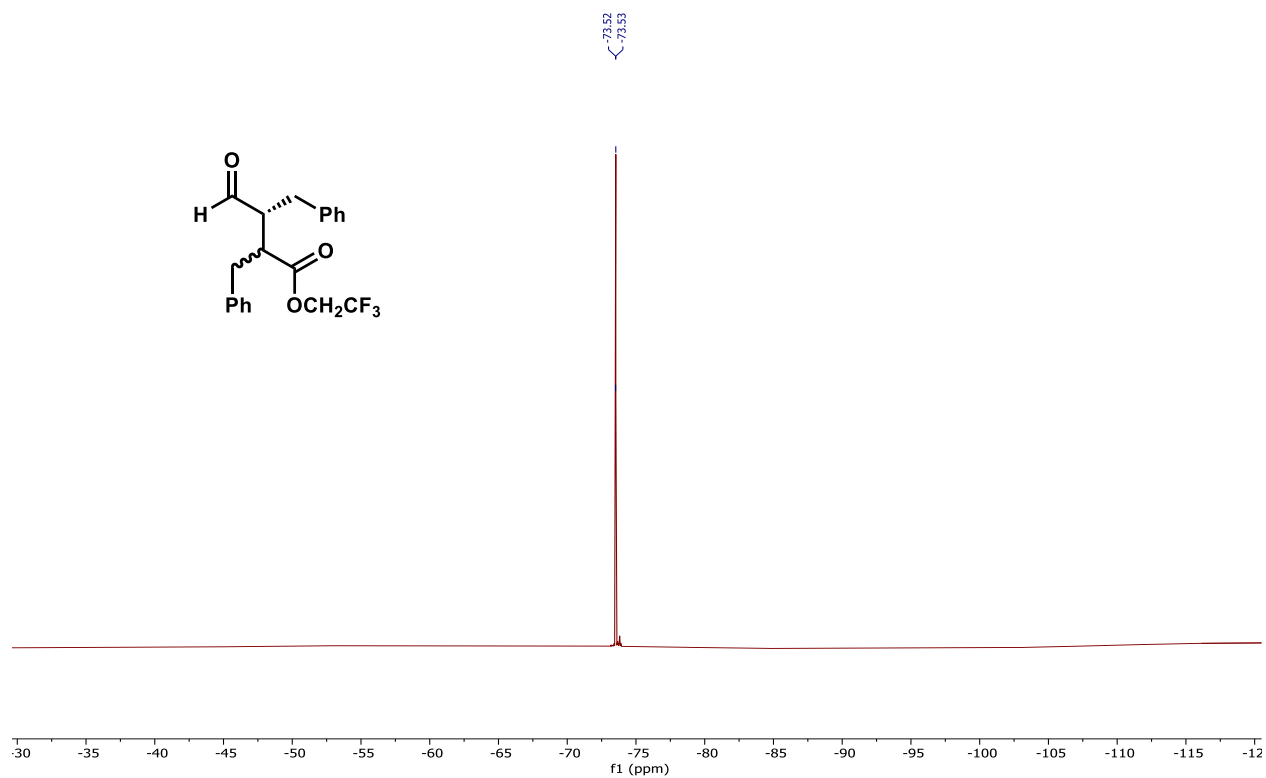

**(4*R*)-3,4-Dibenzylidihydrofuran-2(3*H*)-one, 13ia:**

**<sup>1</sup>H NMR (600 MHz, CDCl<sub>3</sub>)**

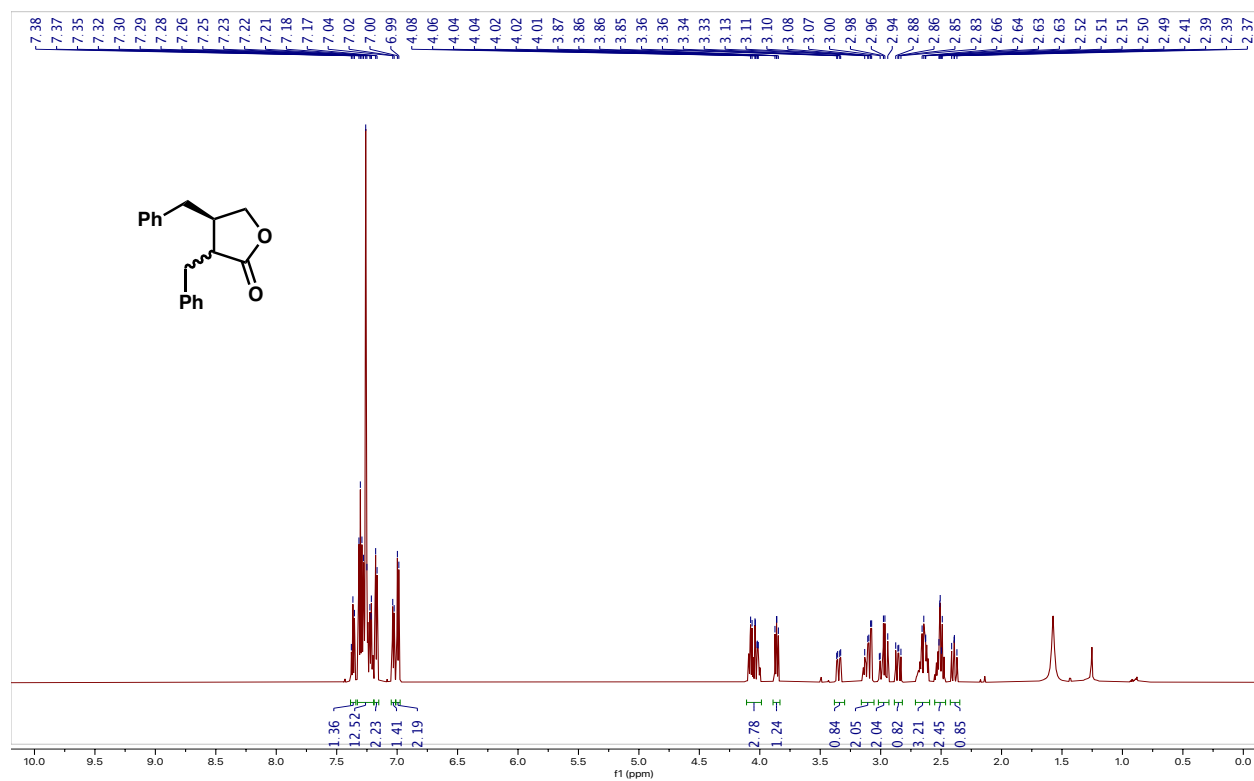

**<sup>13</sup>C NMR (151 MHz, CDCl<sub>3</sub>)**

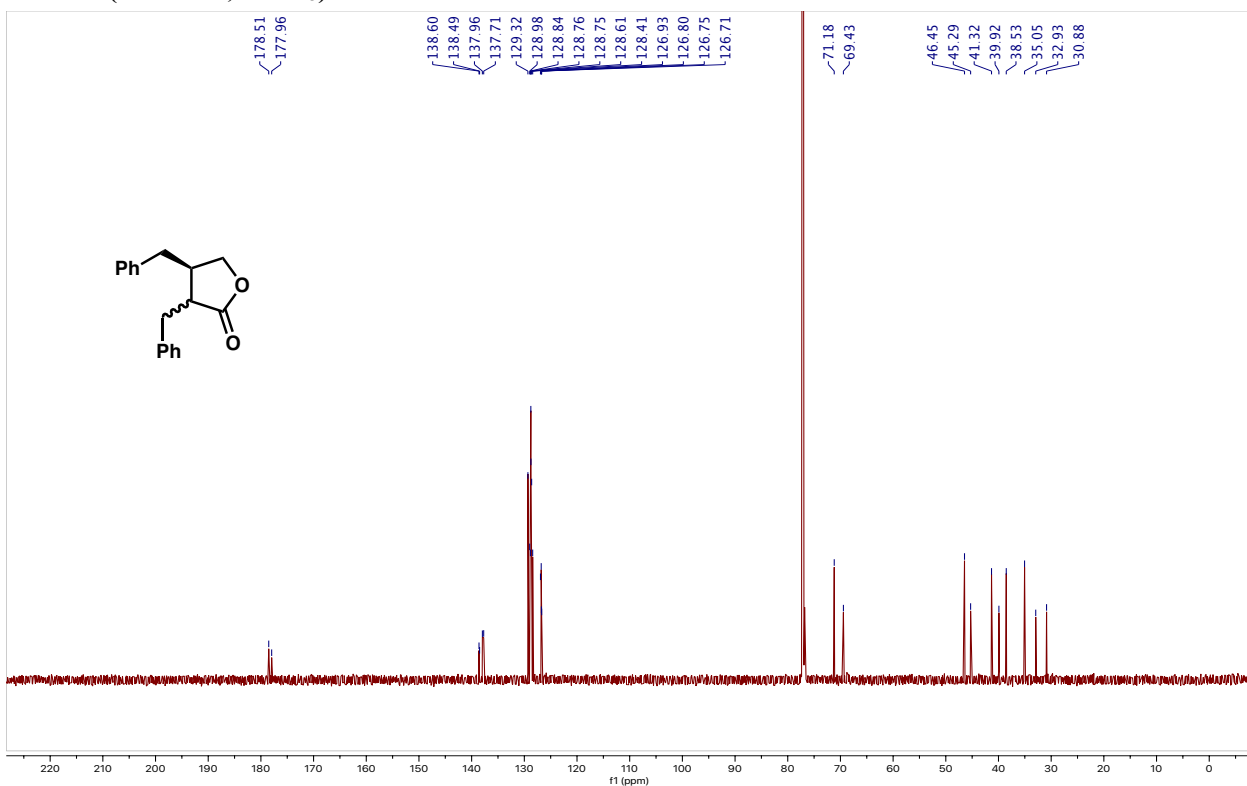



**<sup>19</sup>F NMR (565 MHz, CDCl<sub>3</sub>)**

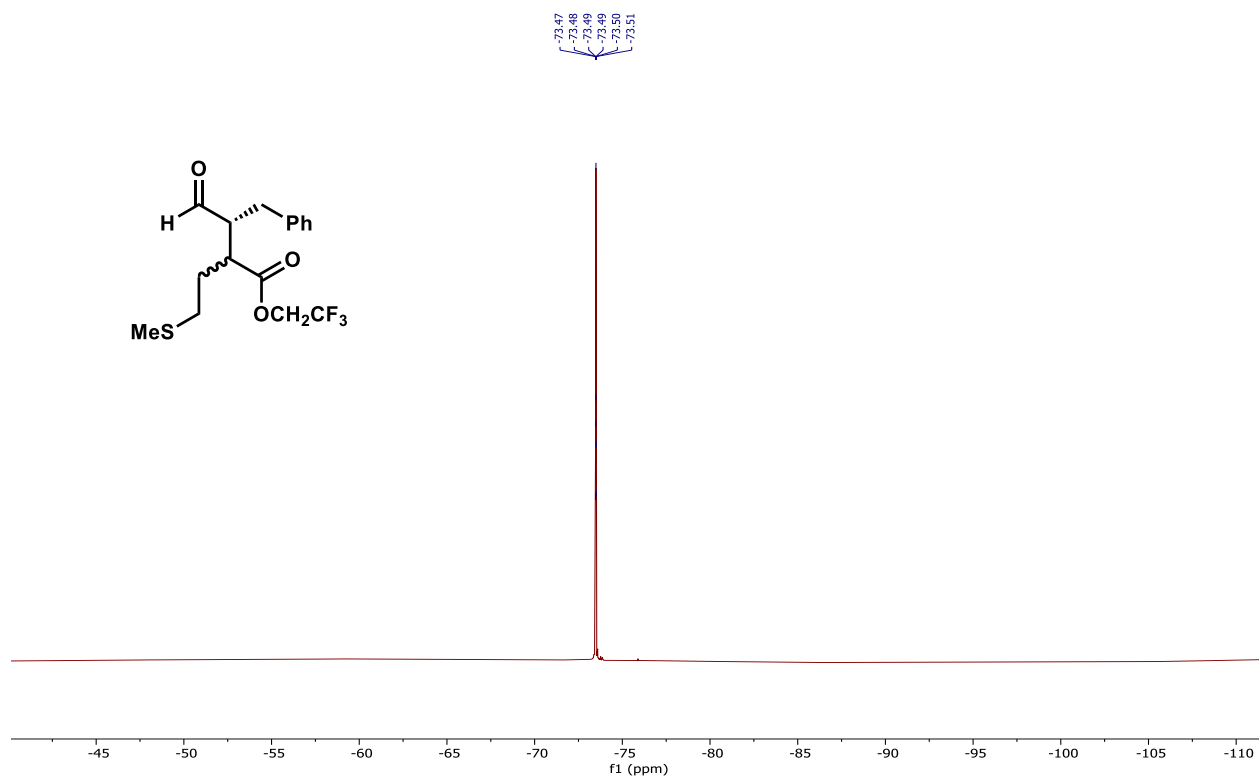

**(2*R*)-2-Benzyl-3-(2-(methylthio)ethyl)butane-1,4-diy dibenzoate, 13ja**

**<sup>1</sup>H NMR (600 MHz, CDCl<sub>3</sub>)**

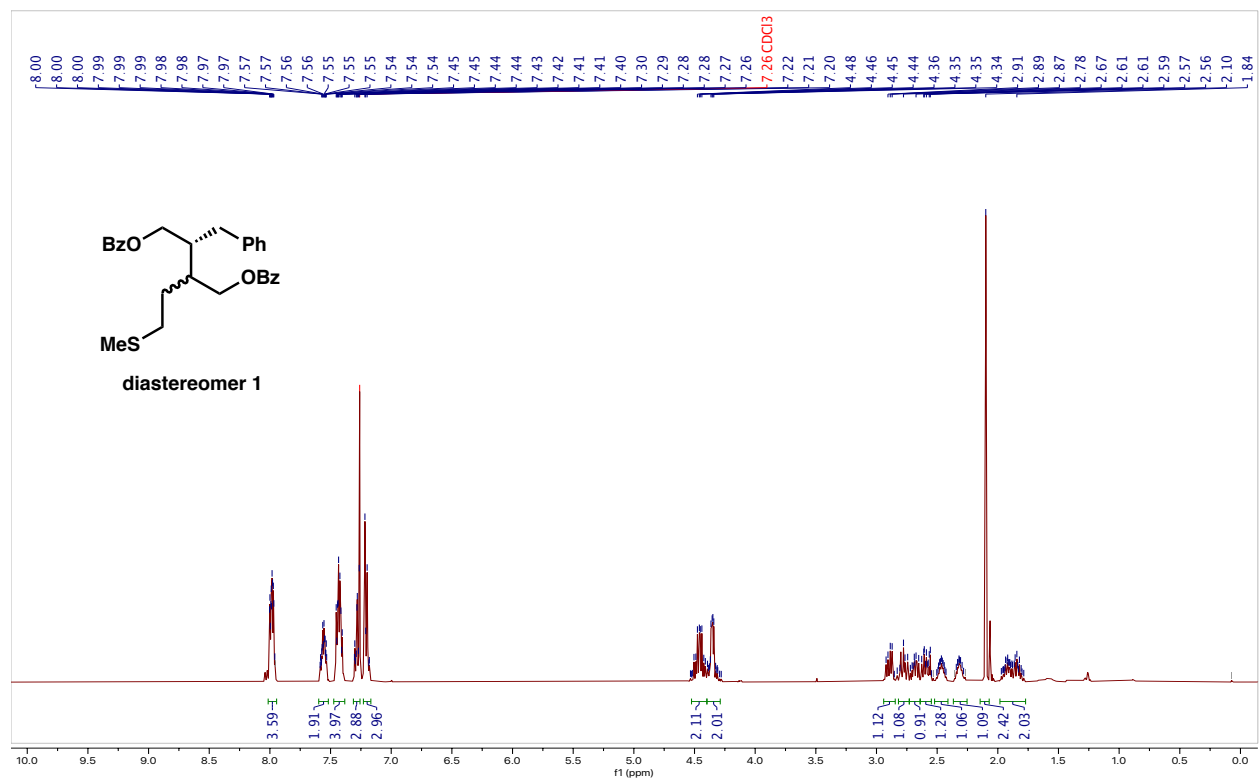

<sup>13</sup>C NMR (151 MHz, CDCl<sub>3</sub>)

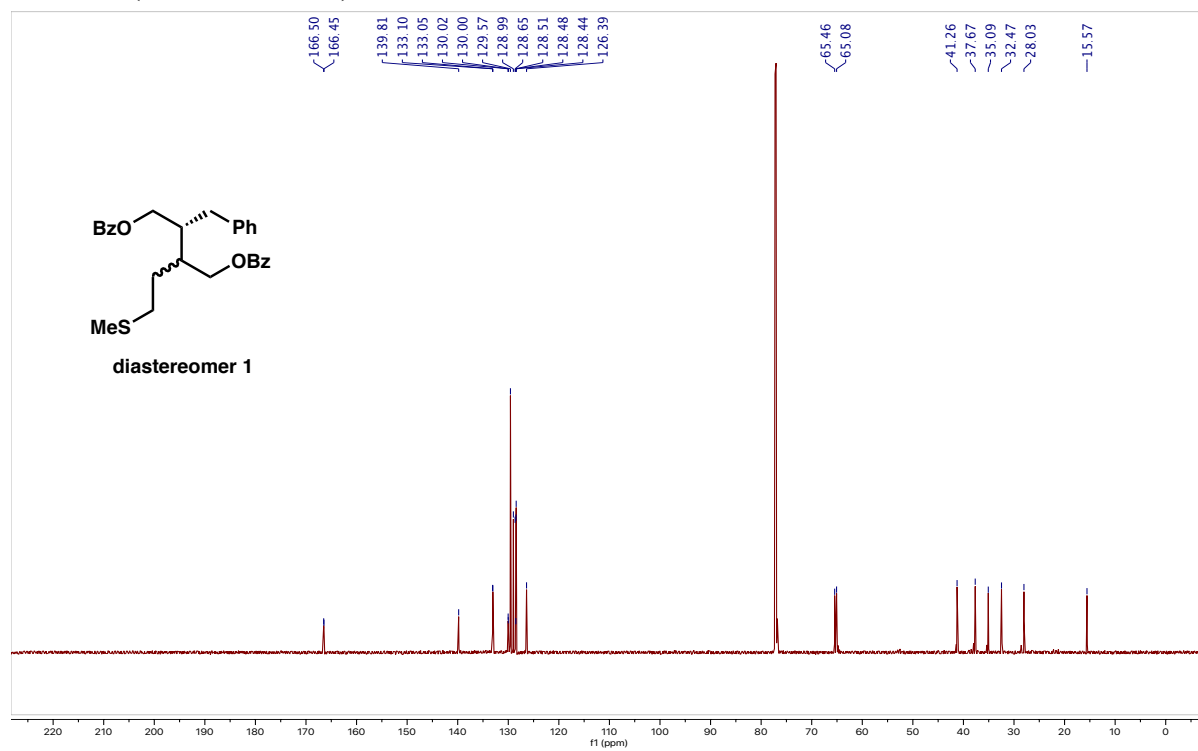



**(2R)-2-Benzyl-3-(2-(methylthio)ethyl)butane-1,4-diyl dibenzoate, 13jb:**  
<sup>1</sup>H NMR (600 MHz, CDCl<sub>3</sub>)

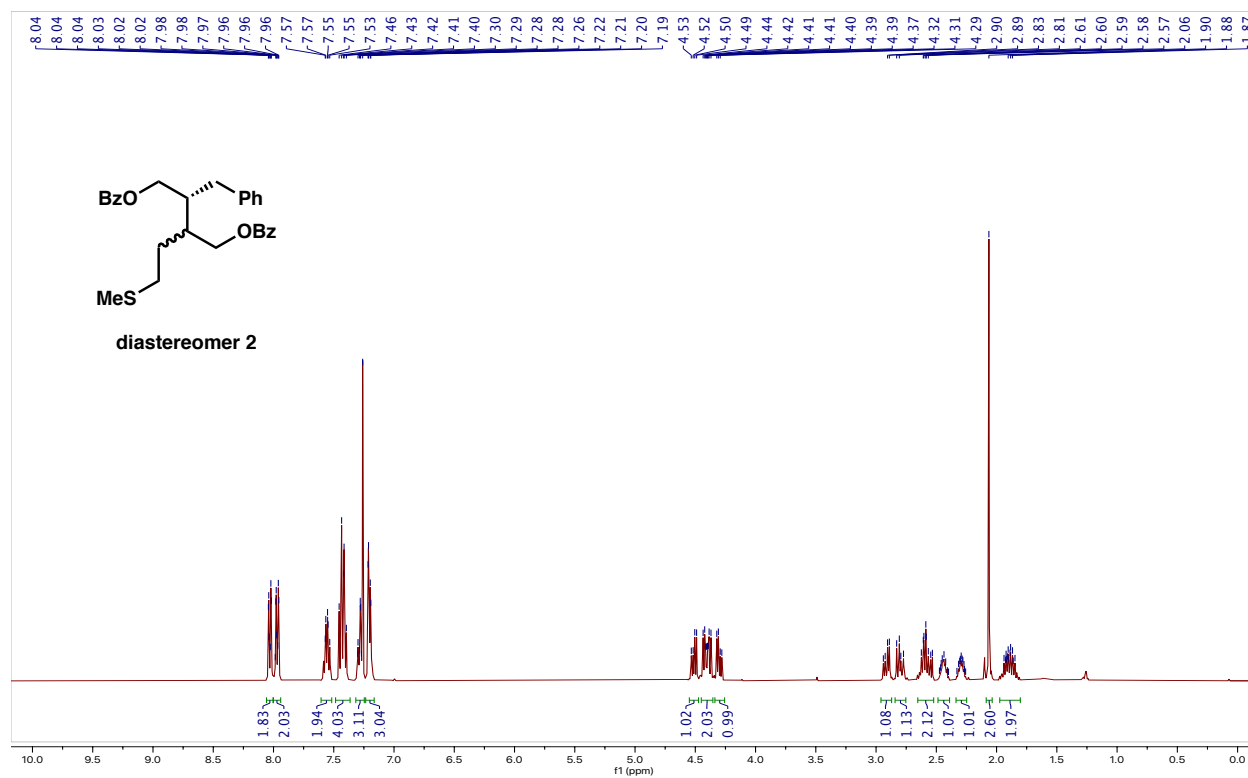

**<sup>13</sup>C NMR (151 MHz, CDCl<sub>3</sub>)**

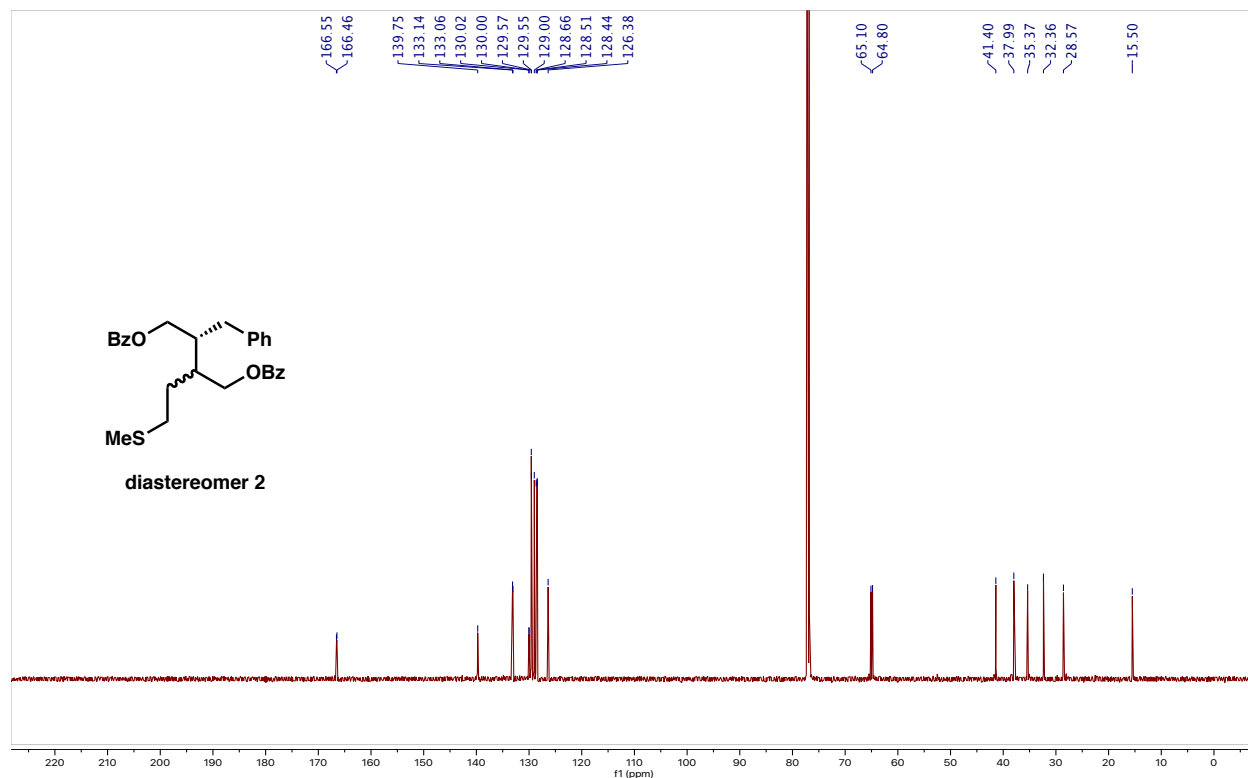

2,2,2-Trifluoroethyl (3*R*)-3-benzyl-2-(4-hydroxybenzyl)-4-oxobutanoate, 13k:

<sup>1</sup>H NMR (600 MHz, CDCl<sub>3</sub>)

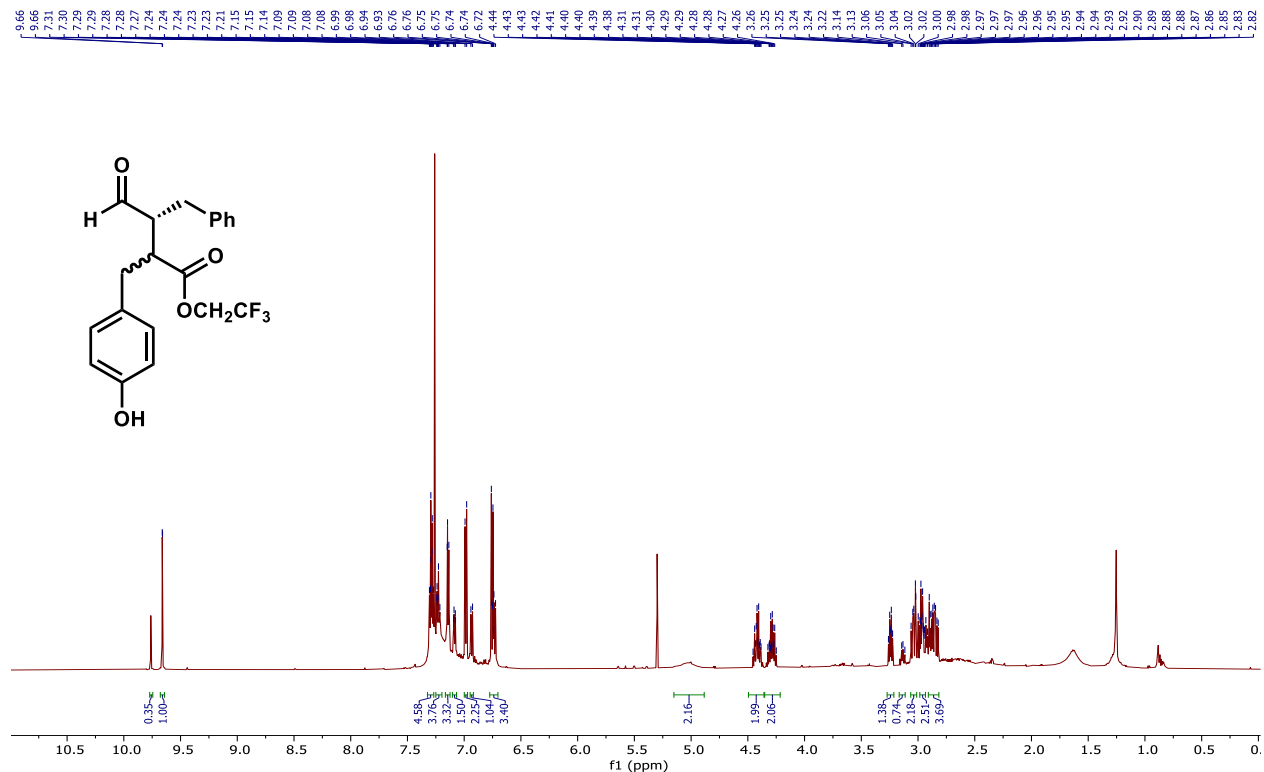

<sup>13</sup>C NMR (151 MHz, CDCl<sub>3</sub>)

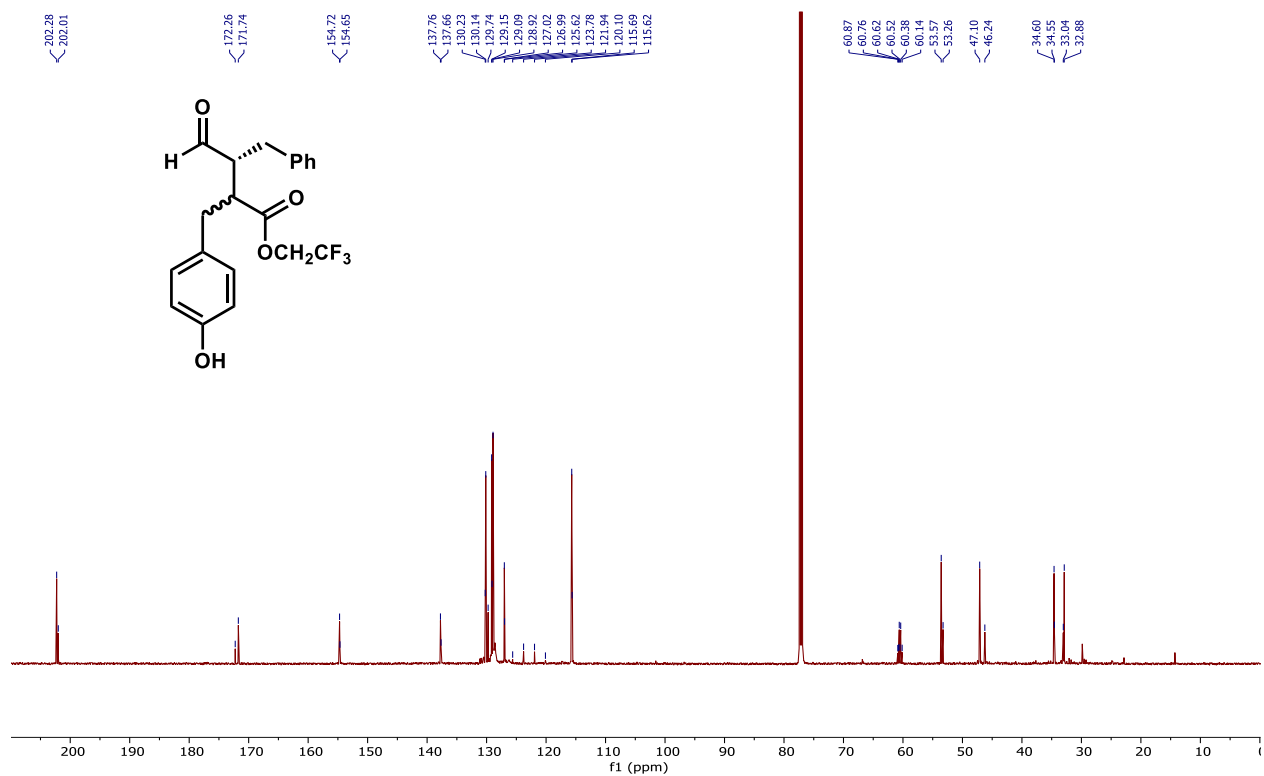

<sup>19</sup>F NMR (565 MHz, CDCl<sub>3</sub>)

73.48  
73.47  
73.51  
73.74  
73.75

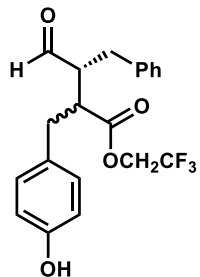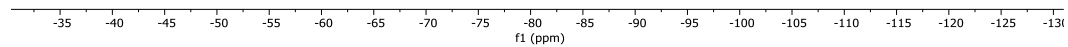

(4R)-4-Benzyl-3-(4-hydroxybenzyl)dihydrofuran-2(3H)-one, 13ka:

<sup>1</sup>H NMR (600 MHz, CDCl<sub>3</sub>)

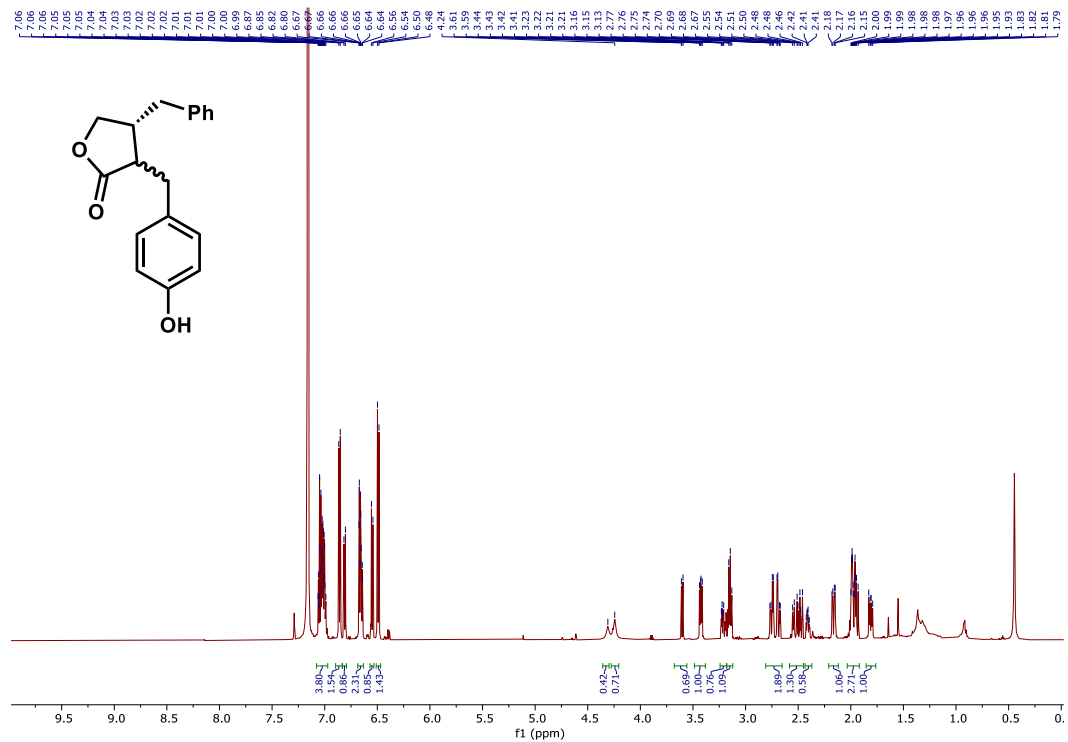

<sup>13</sup>C NMR (151 MHz, CDCl<sub>3</sub>)

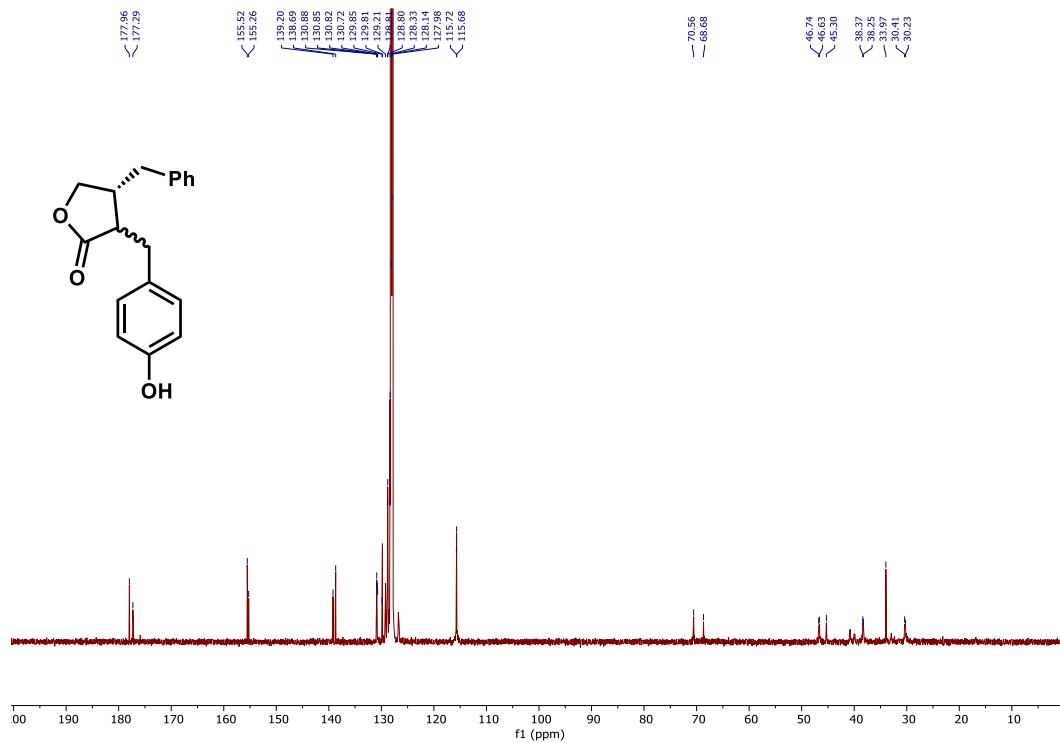

2,2,2-Trifluoroethyl (3R)-3-benzyl-2-(3-hydroxybenzyl)-4-oxobutanoate, 13I :

<sup>1</sup>H NMR (600 MHz, CDCl<sub>3</sub>)

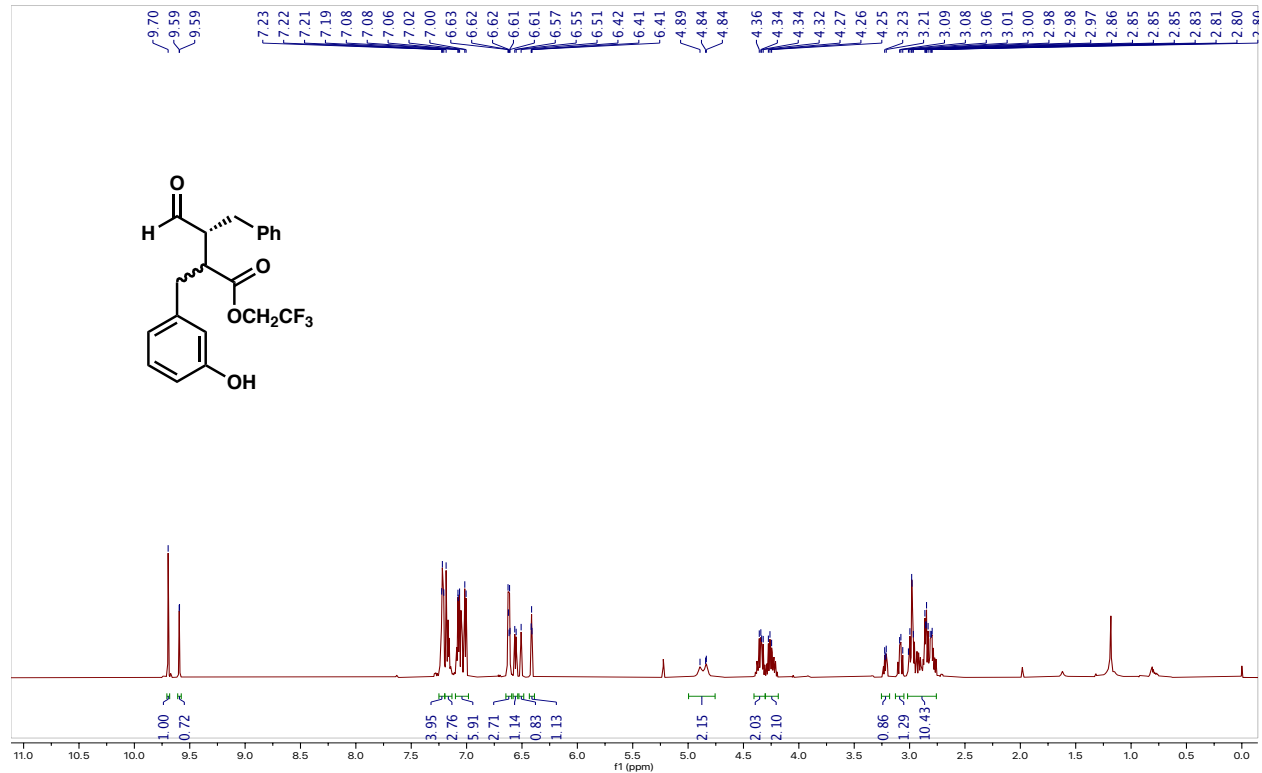

**$^{13}\text{C}$  NMR (151 MHz,  $\text{CDCl}_3$ )**

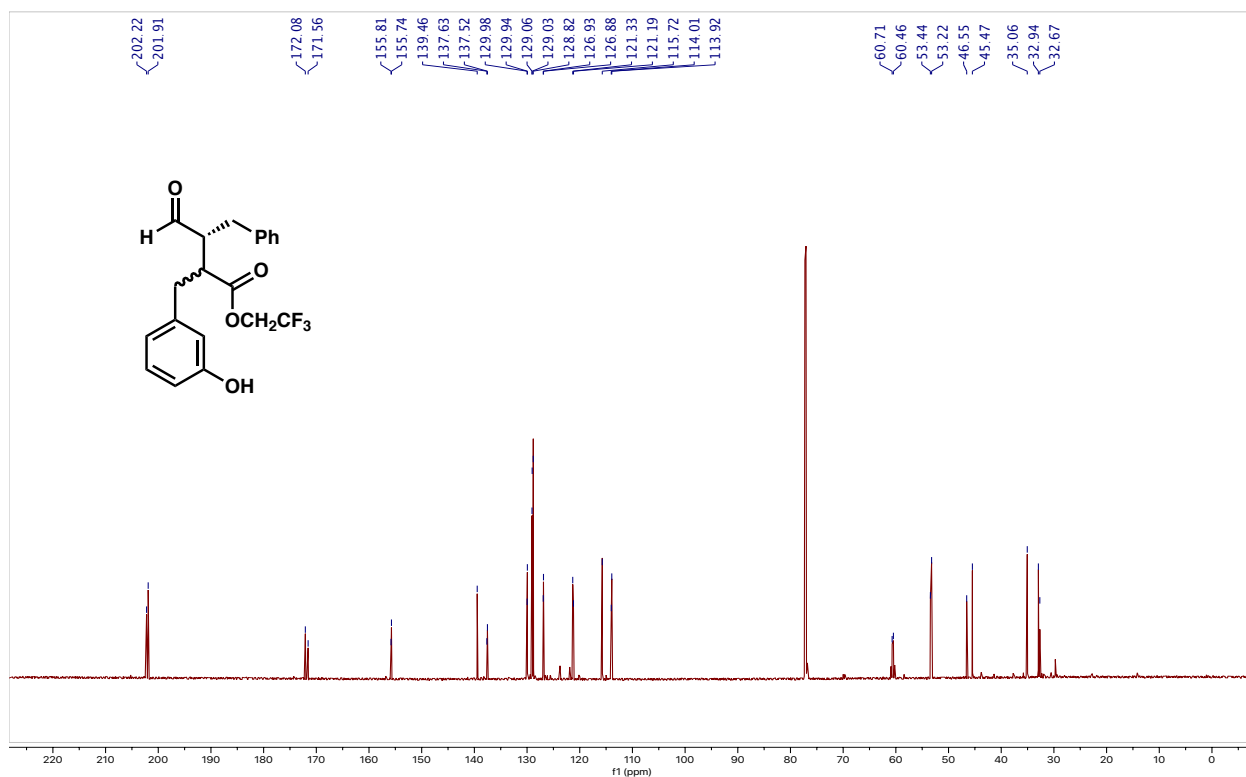

**$^{19}\text{F}$  NMR (565 MHz,  $\text{CDCl}_3$ )**

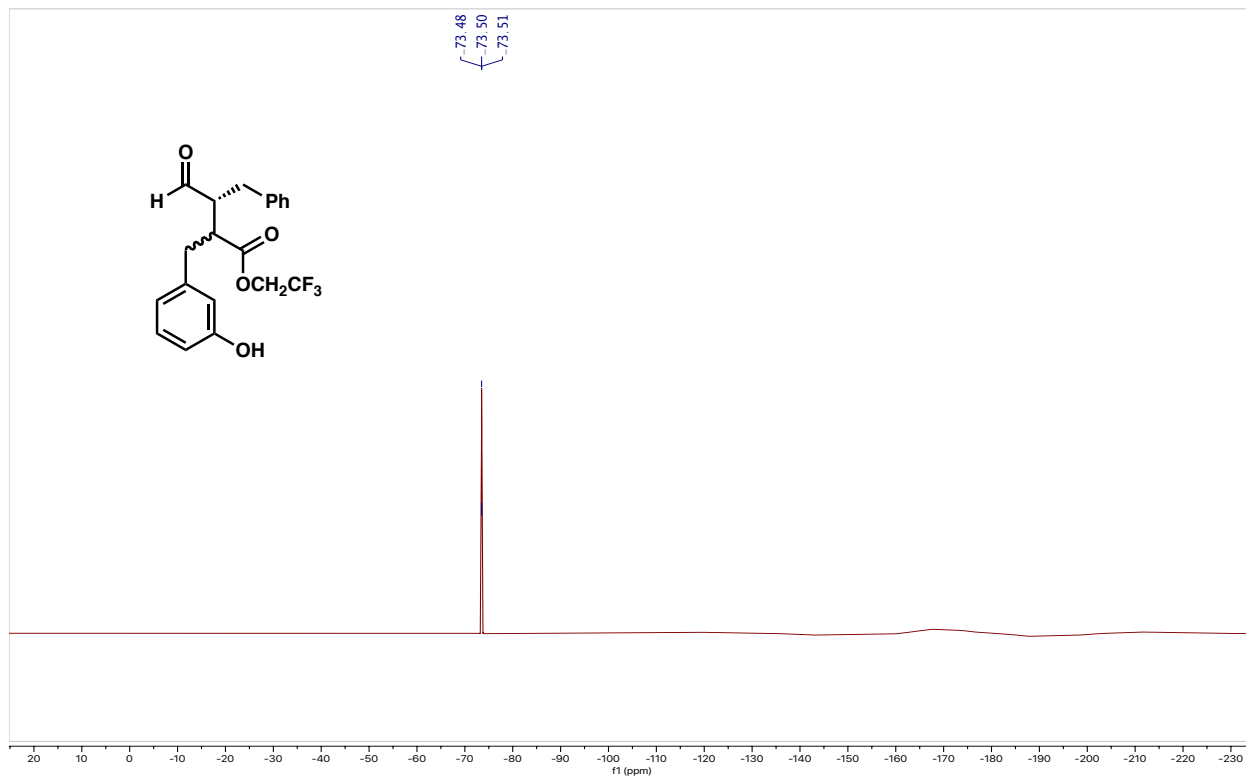

**(4*R*)-4-Benzyl-3-(3-hydroxybenzyl)dihydrofuran-2(3*H*)-one, 13a :**  
**<sup>1</sup>H NMR (600 MHz, CDCl<sub>3</sub>)**

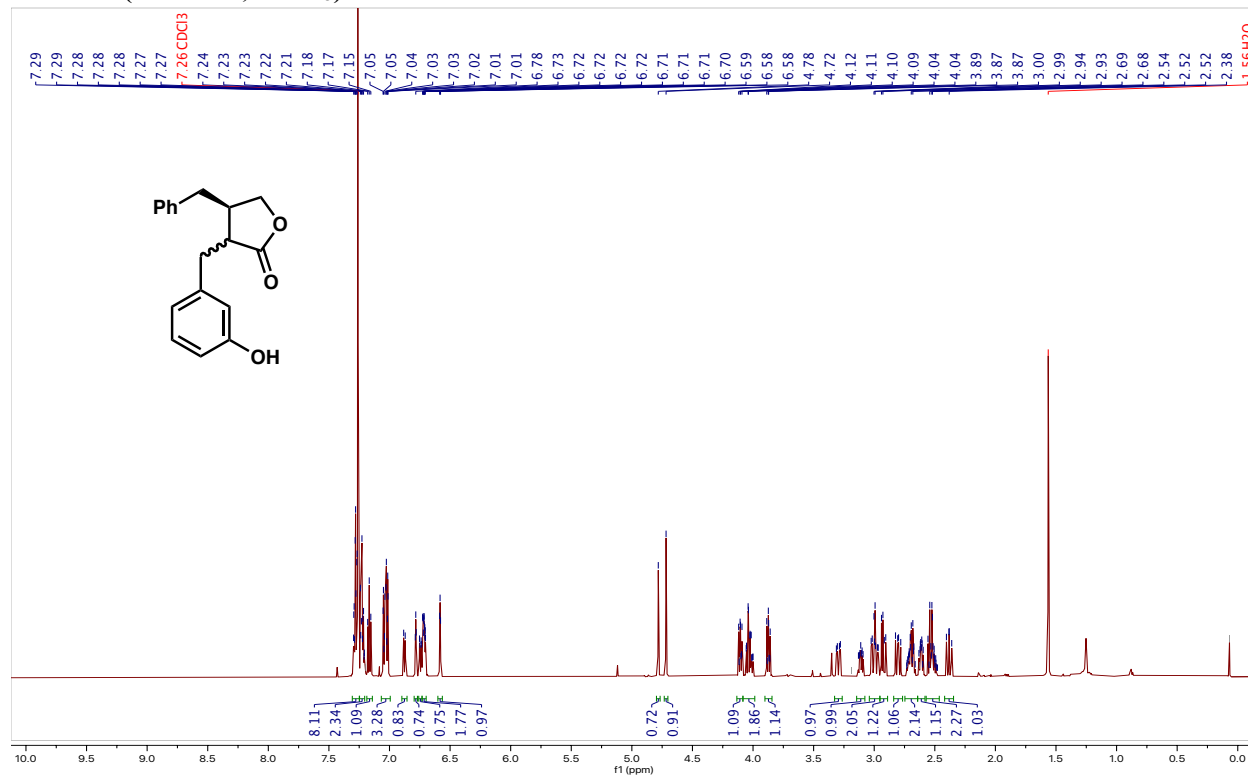

**<sup>13</sup>C NMR (151 MHz, CDCl<sub>3</sub>)**

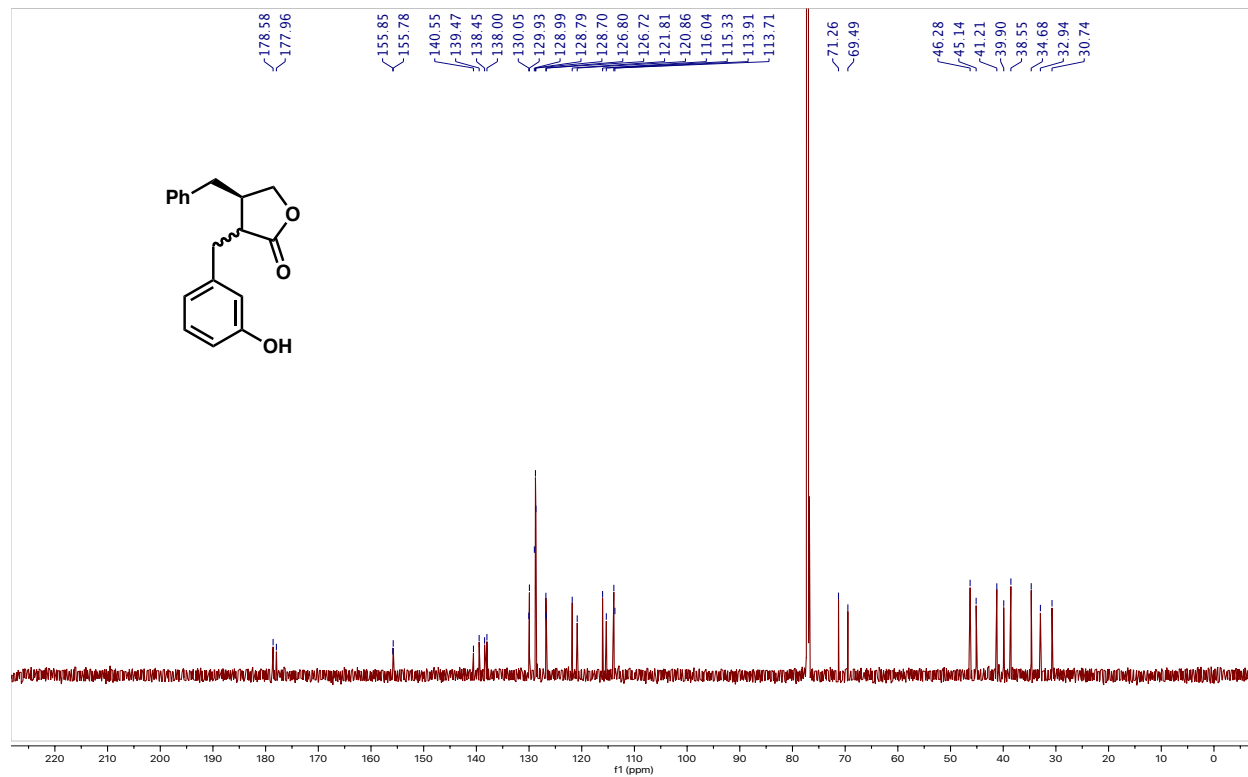

**(R)-2-Benzyl-4-oxo-4-phenylbutanal, 15a:**

<sup>1</sup>H NMR (400 MHz, CDCl<sub>3</sub>)

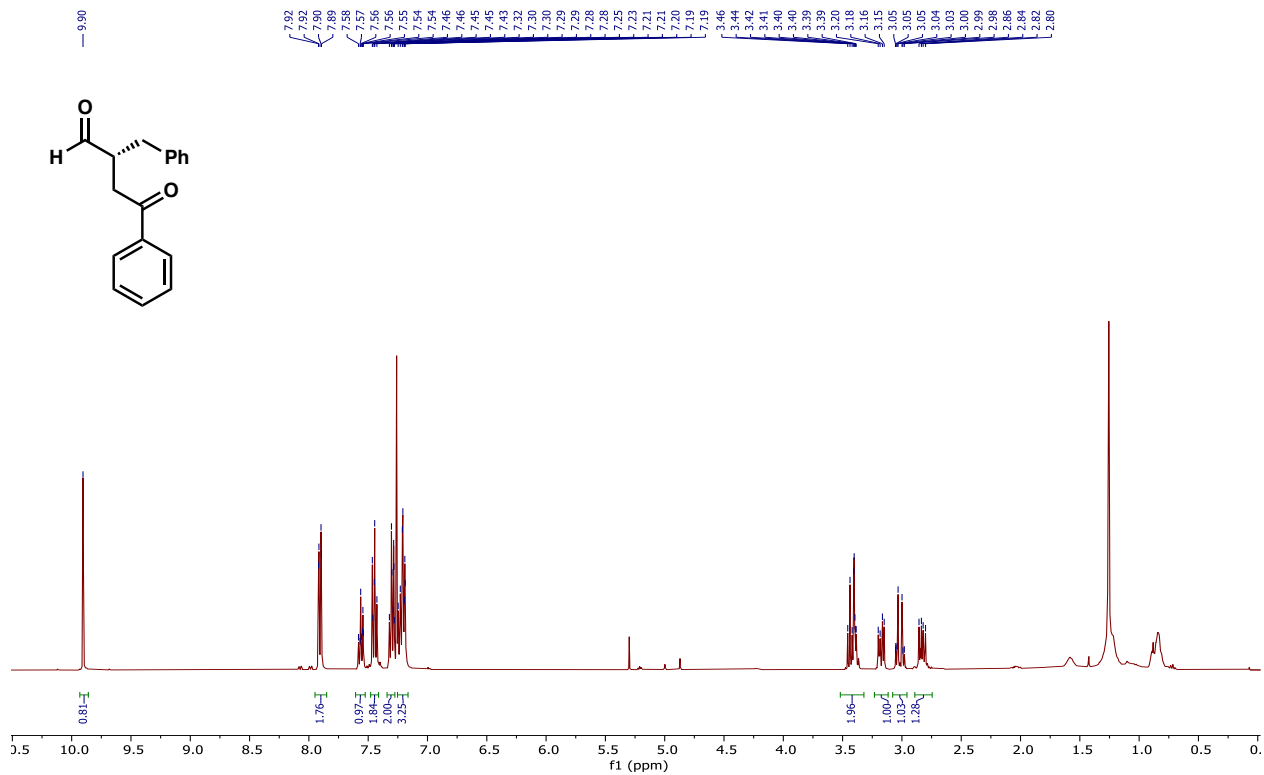

<sup>13</sup>C NMR (101 MHz, CDCl<sub>3</sub>)

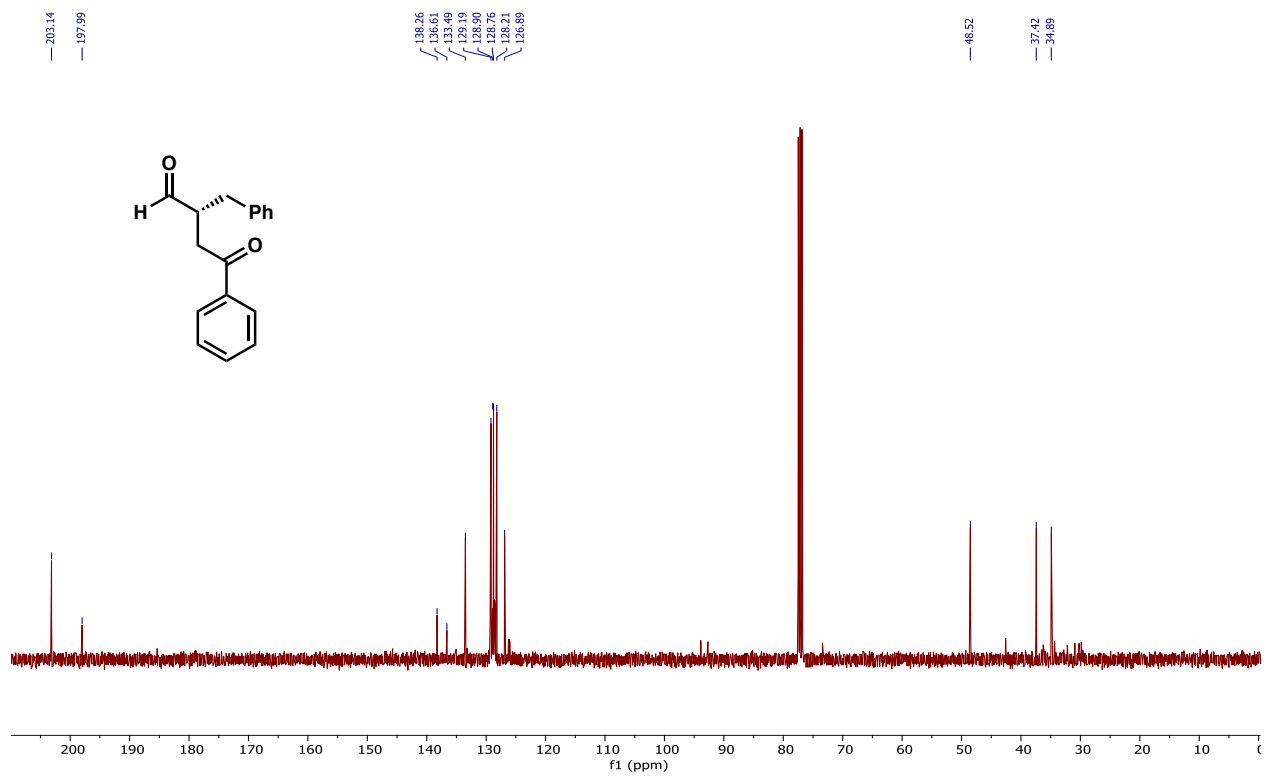

**(R)-2-Benzyl-4-oxo-4-(p-tolyl)butanal, 15b:**

**<sup>1</sup>H NMR (600 MHz, CDCl<sub>3</sub>)**

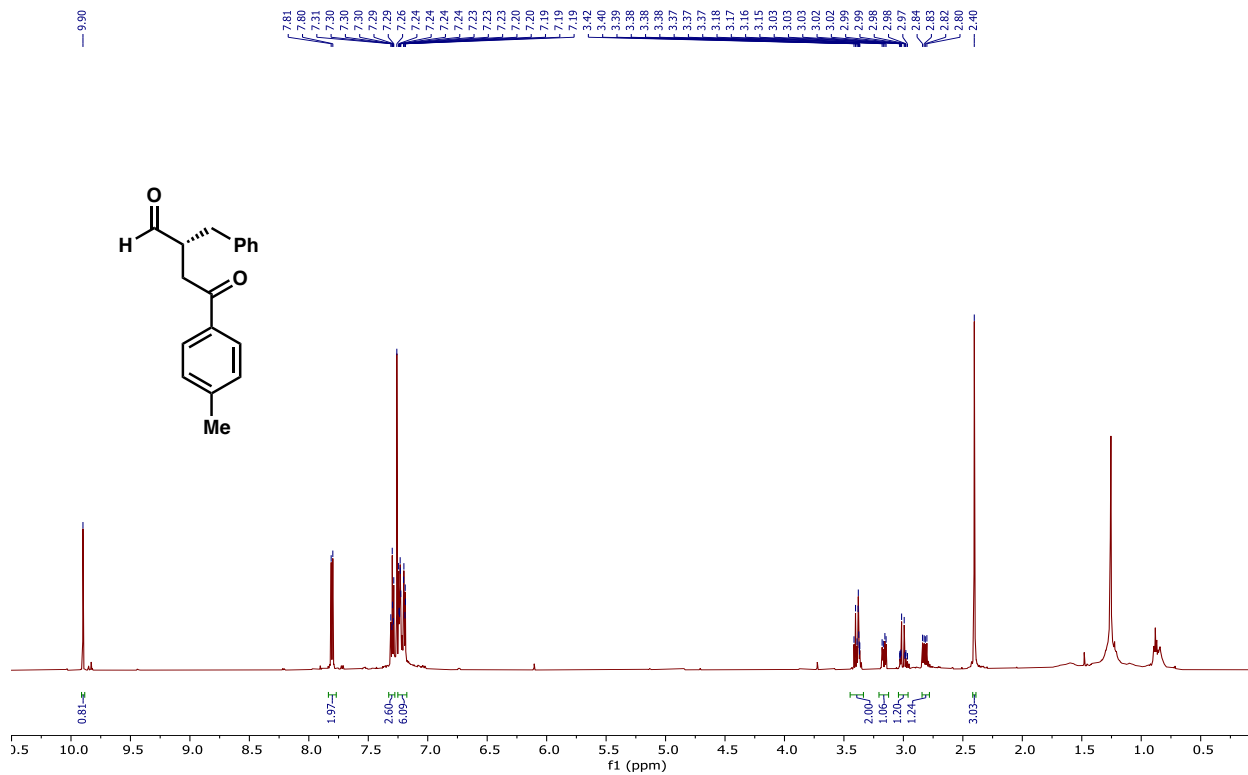

**<sup>13</sup>C NMR (151 MHz, CDCl<sub>3</sub>)**

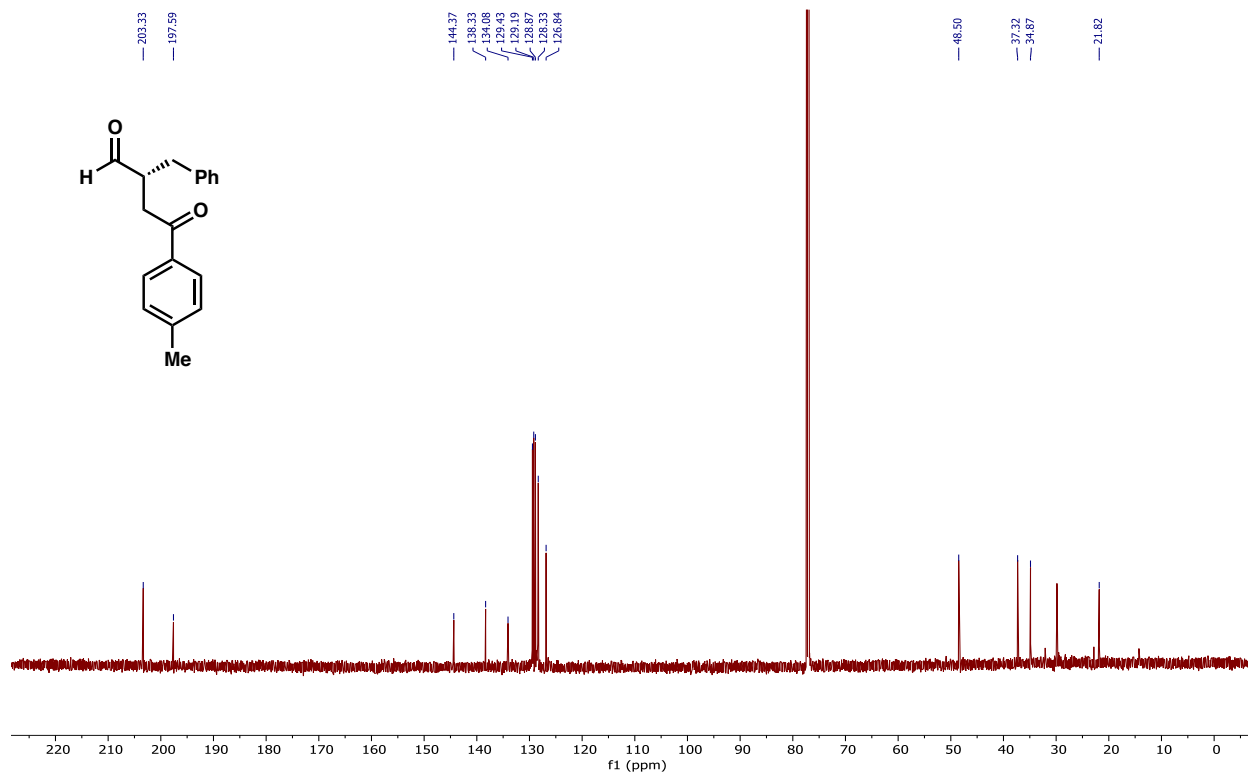



**(R)-2-Benzyl-4-(4-bromophenyl)-4-oxobutanal, 15c :**  
**<sup>1</sup>H NMR (400 MHz, CDCl<sub>3</sub>)**

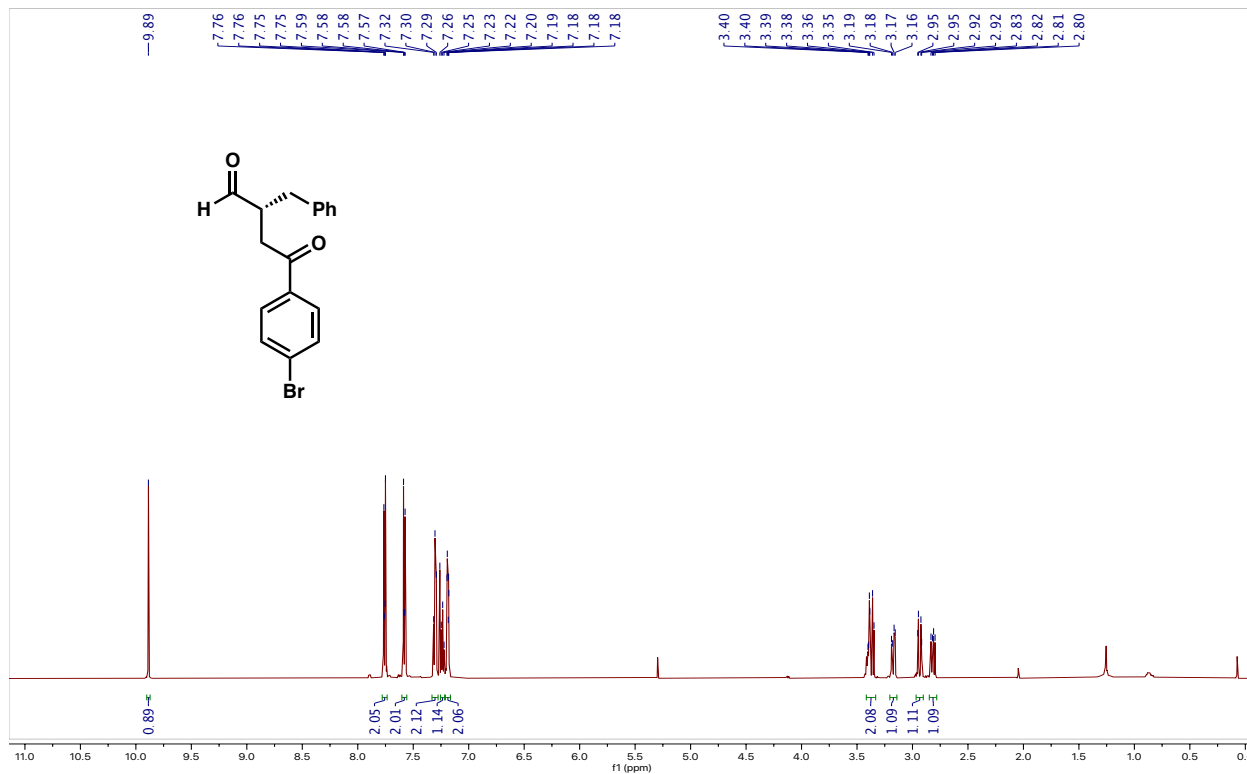

**<sup>13</sup>C NMR (151 MHz, CDCl<sub>3</sub>)**

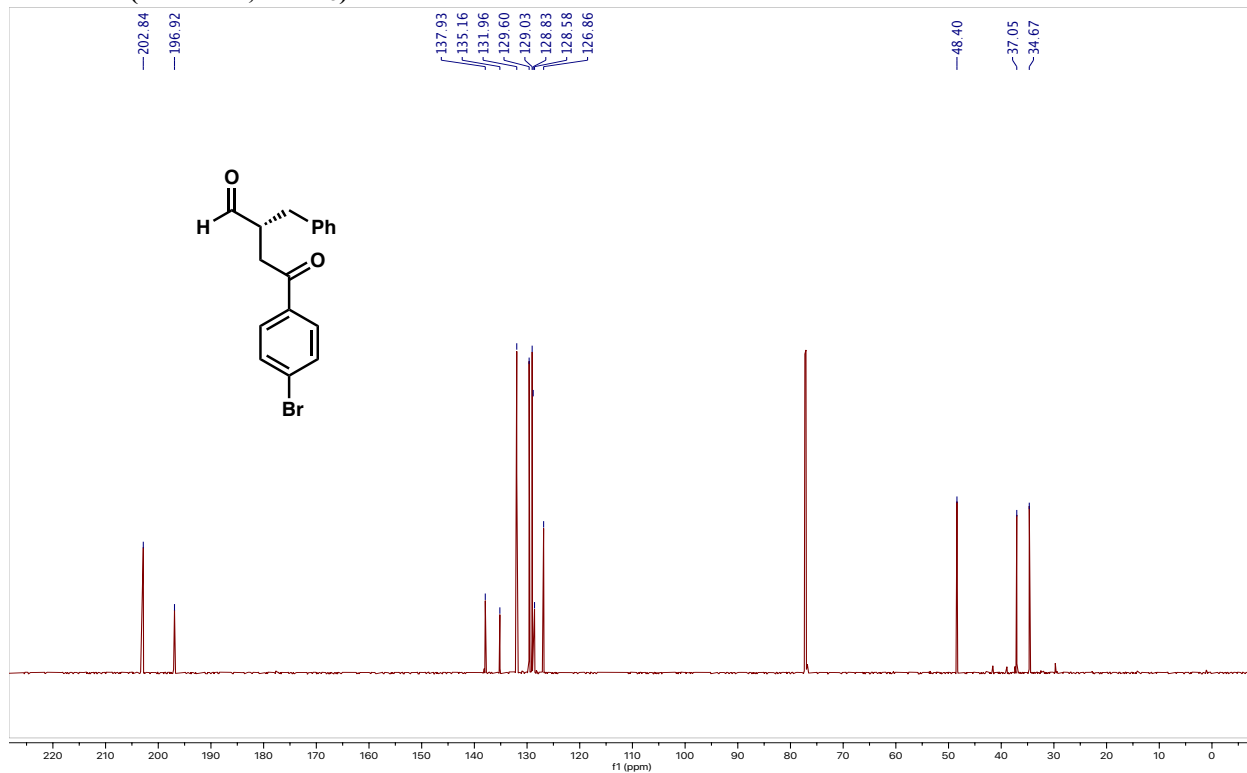

**(R)-2-Benzyl-4-(4-chlorophenyl)-4-oxobutanal, 15d:**

**<sup>1</sup>H NMR (600 MHz, CDCl<sub>3</sub>)**

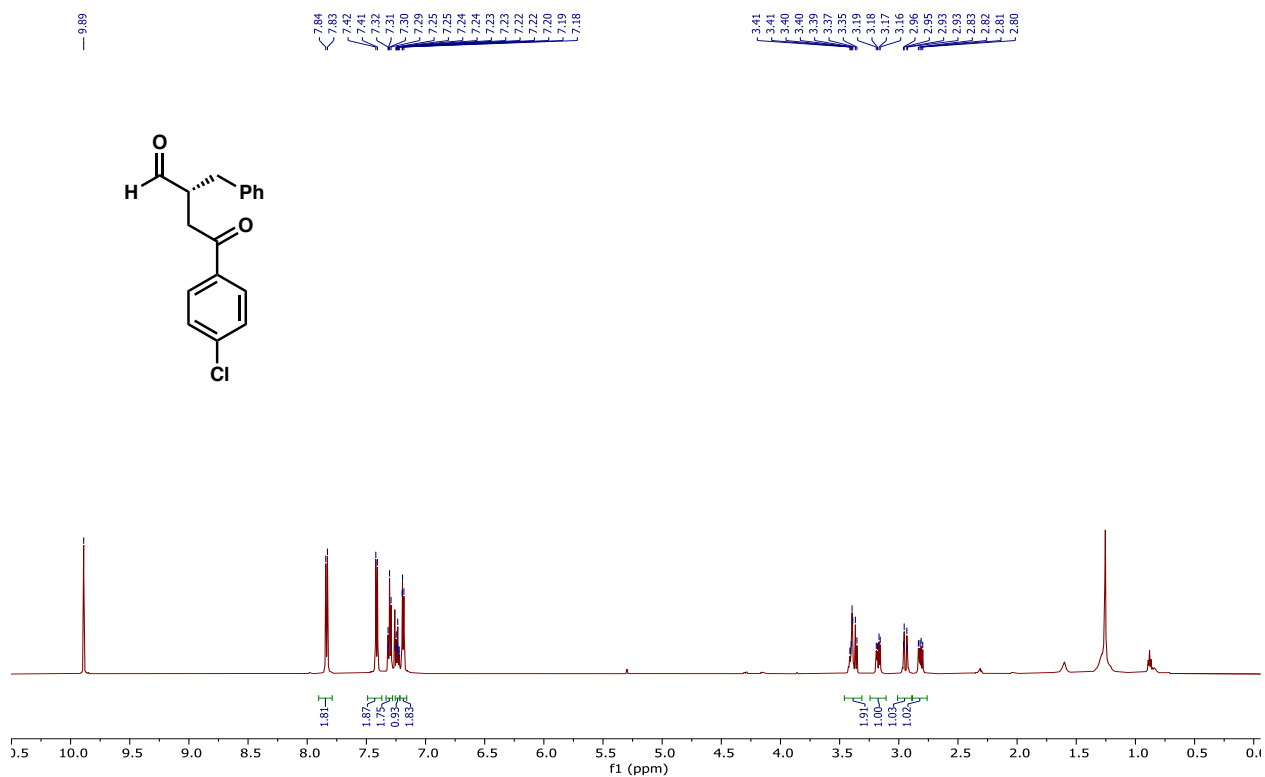

**<sup>13</sup>C NMR (151 MHz, CDCl<sub>3</sub>)**

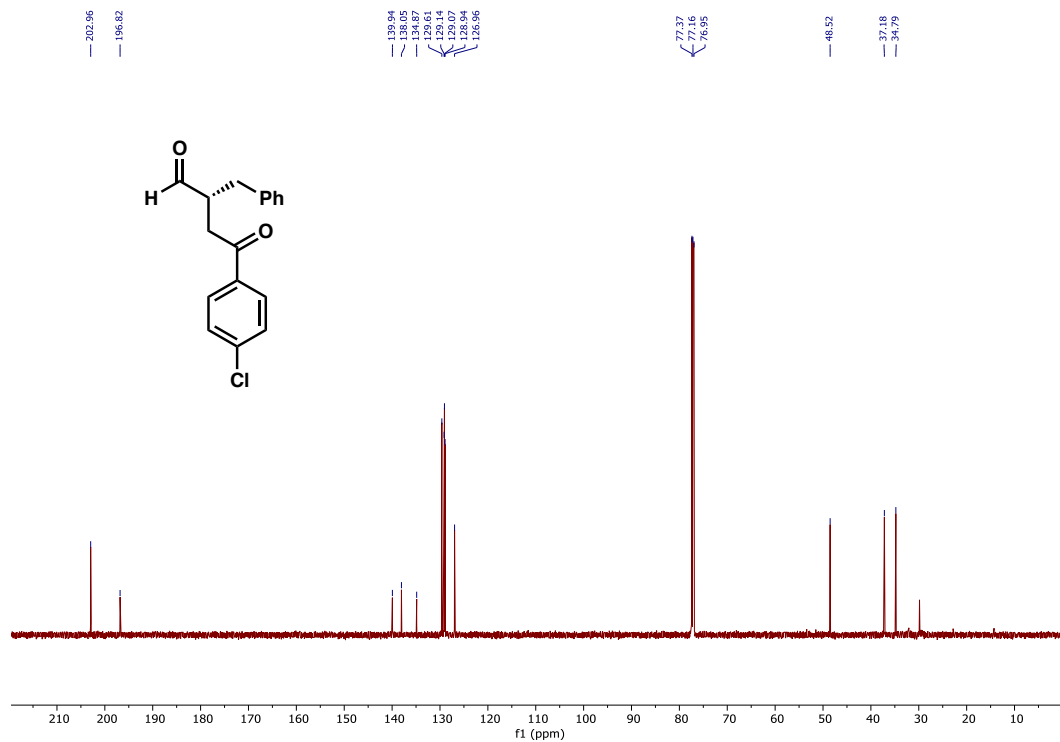

**(R)-2-Benzyl-4-(4-fluorophenyl)-4-oxobutanal, 15e:**

**<sup>1</sup>H NMR (400 MHz, CDCl<sub>3</sub>)**

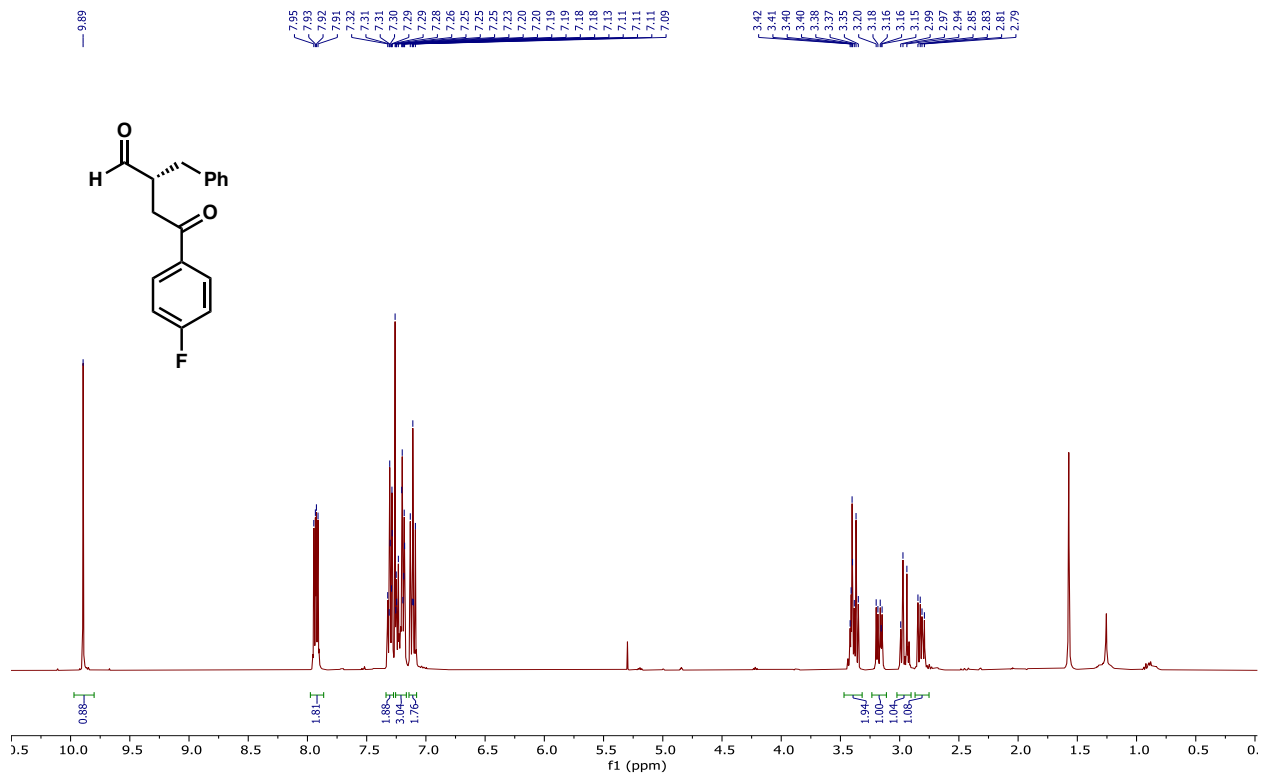

**<sup>13</sup>C NMR (151 MHz, CDCl<sub>3</sub>)**

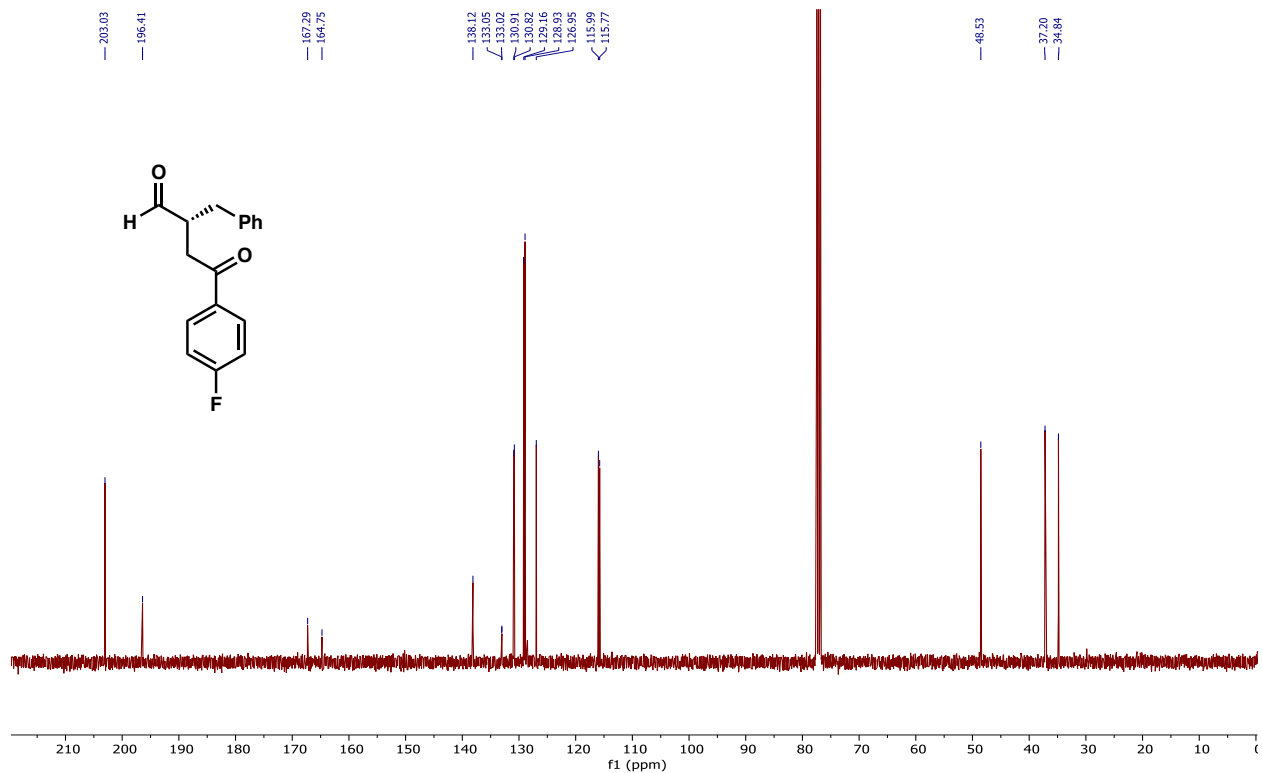

**$^{19}\text{F}$  NMR (376 MHz,  $\text{CDCl}_3$ )**

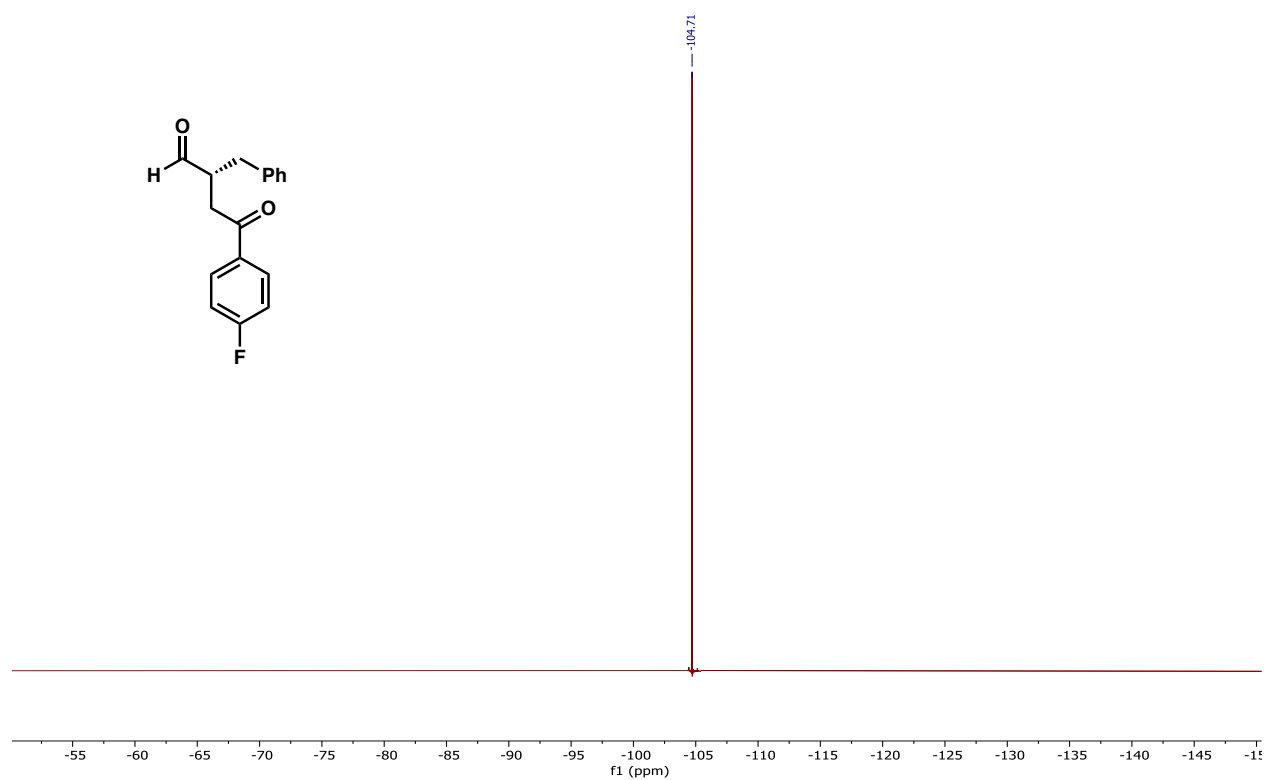

**(R)-2-Benzyl-4-(2-fluorophenyl)-4-oxobutanal, 15f :**

**$^1\text{H}$  NMR (400 MHz,  $\text{CDCl}_3$ )**

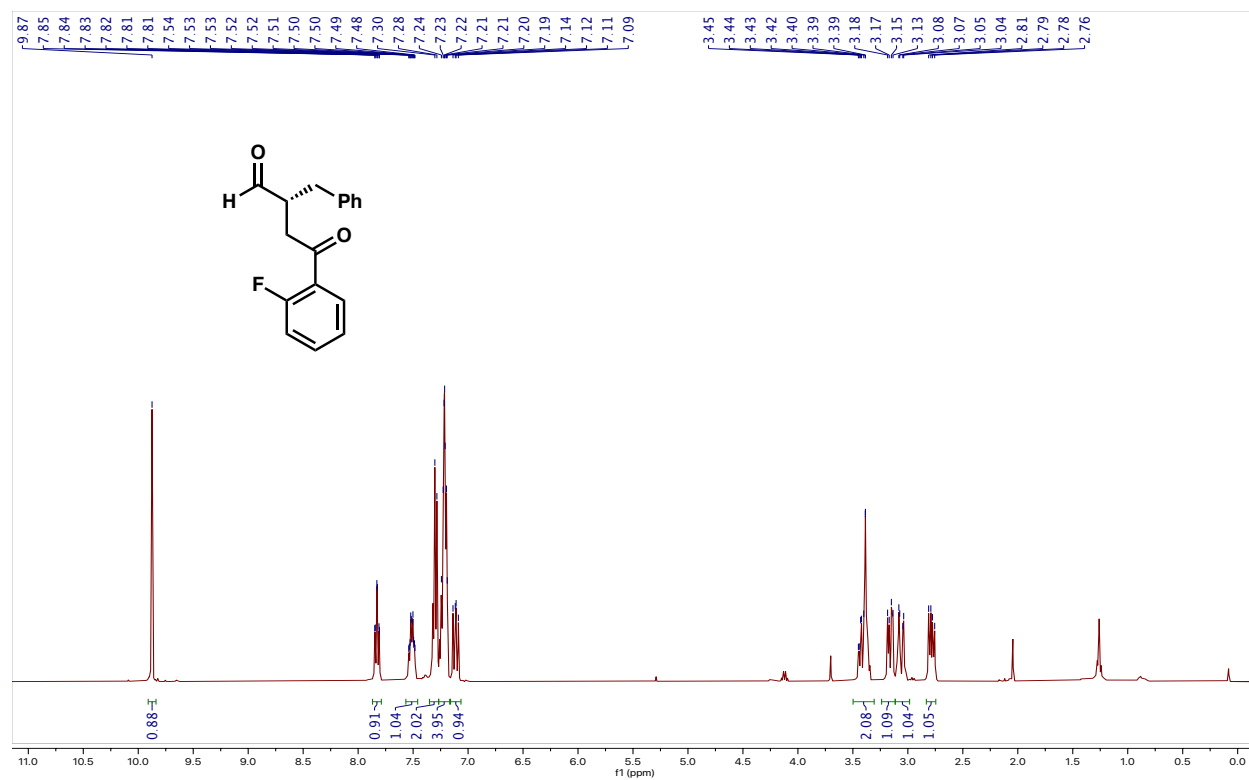

**$^{13}\text{C}$  NMR (151 MHz,  $\text{CDCl}_3$ )**

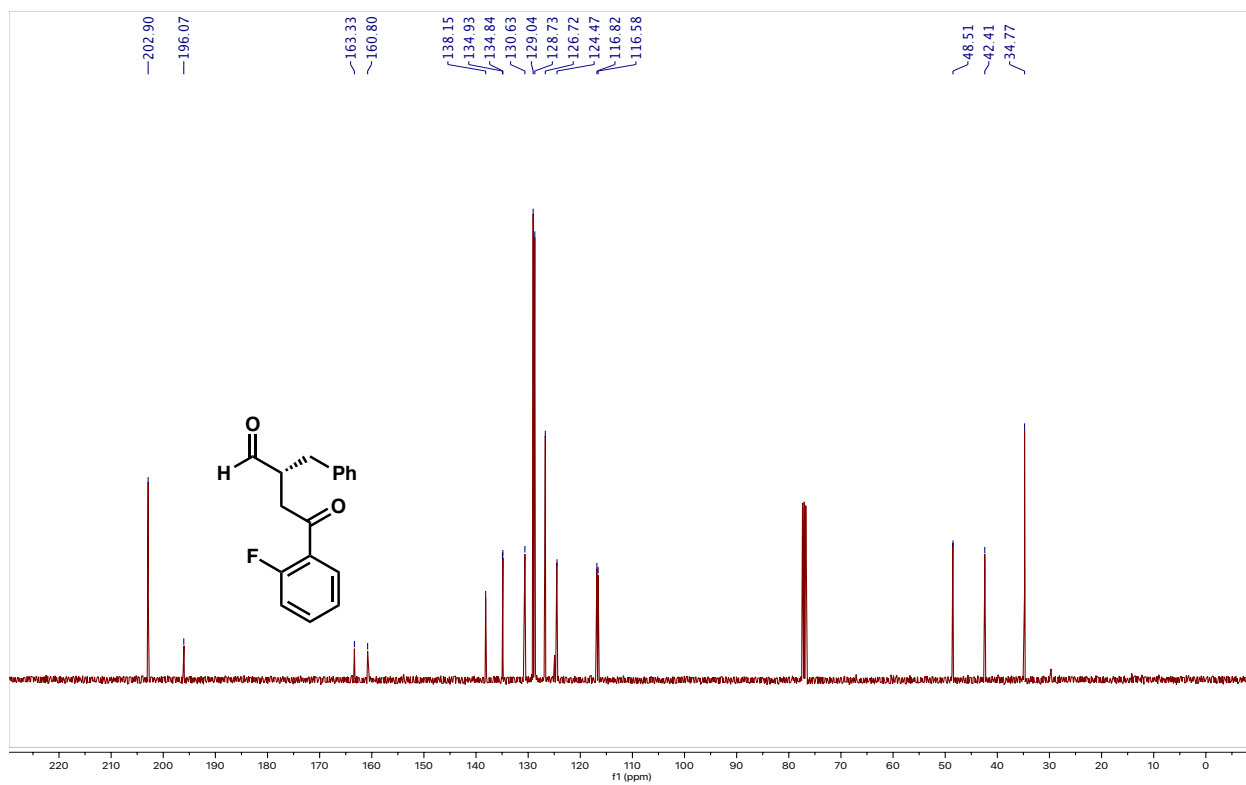

**$^{19}\text{F}$  NMR (565 MHz,  $\text{CDCl}_3$ )**

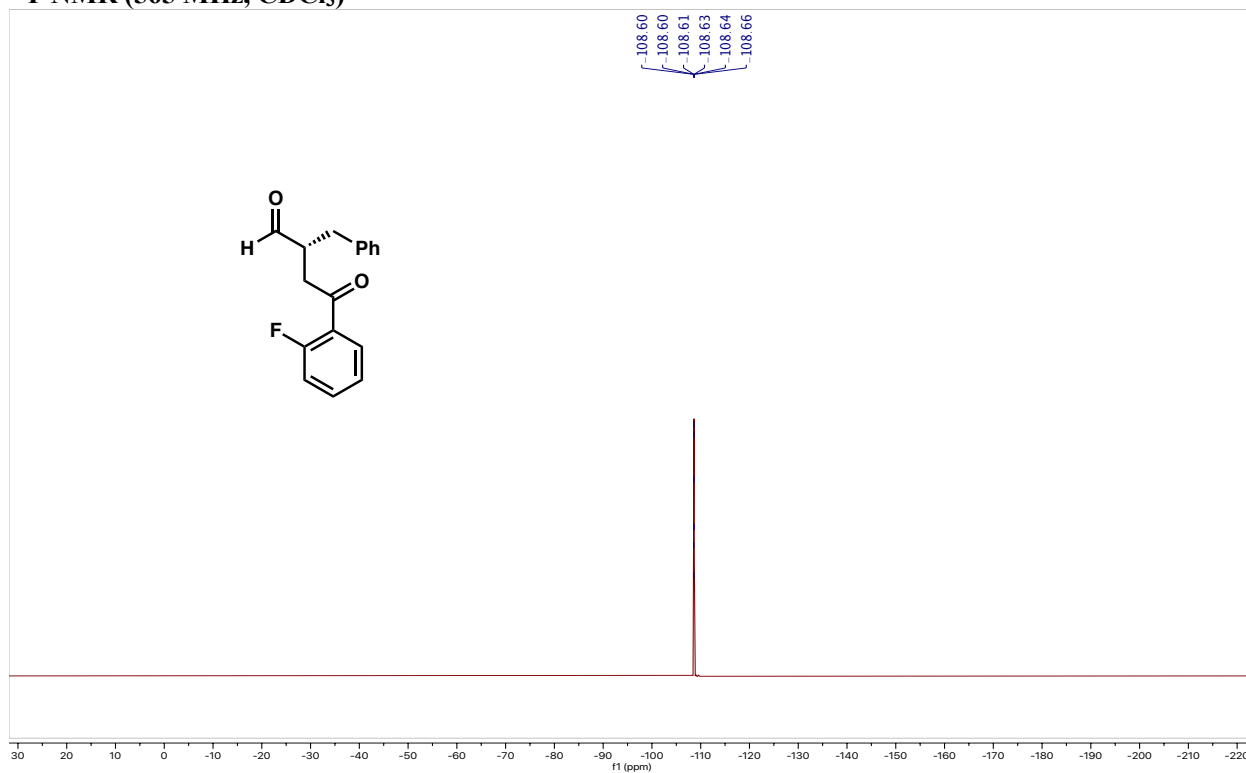

**(R)-3-Benzyl-4-oxobutanenitrile, 15g :**

**<sup>1</sup>H NMR (600 MHz, CDCl<sub>3</sub>)**

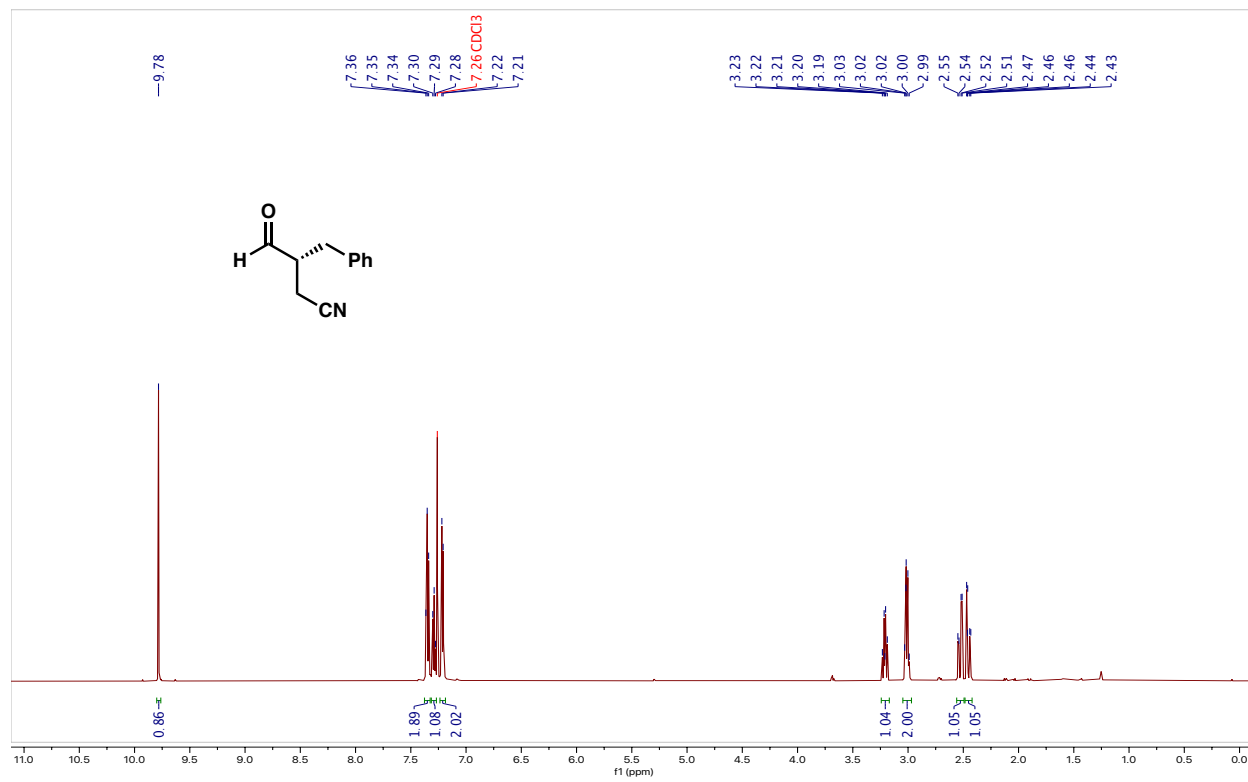

**<sup>13</sup>C NMR (151 MHz, CDCl<sub>3</sub>)**

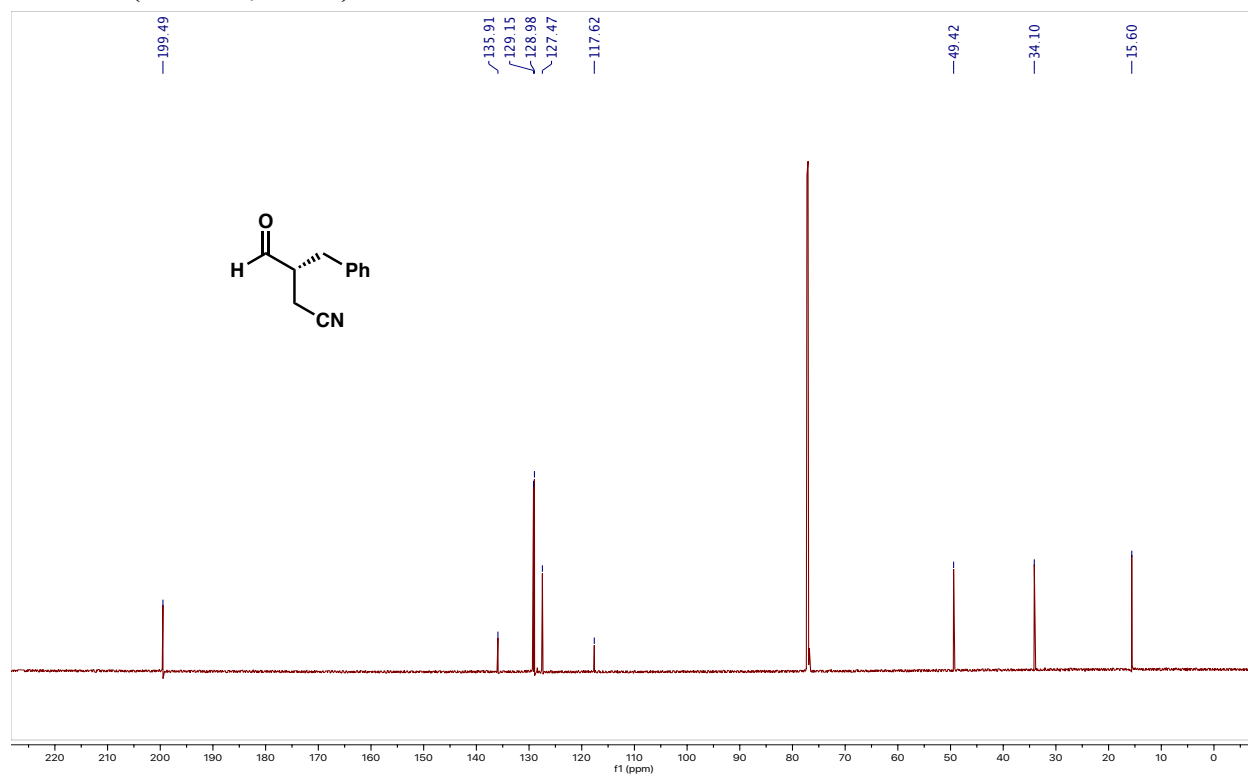

**(R)-2-Benzyl-3-cyanopropyl benzoate, 15ga :**

**<sup>1</sup>H NMR (400 MHz, CDCl<sub>3</sub>)**

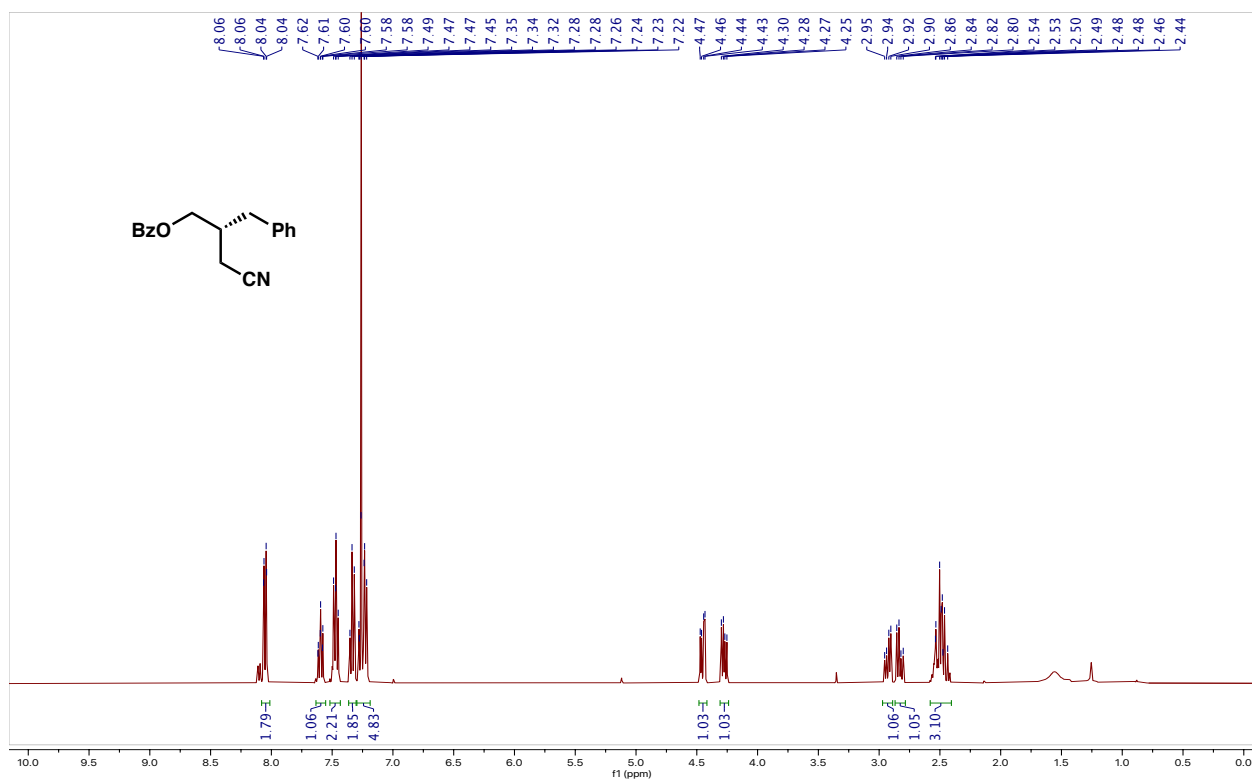

**<sup>13</sup>C NMR (151 MHz, CDCl<sub>3</sub>)**

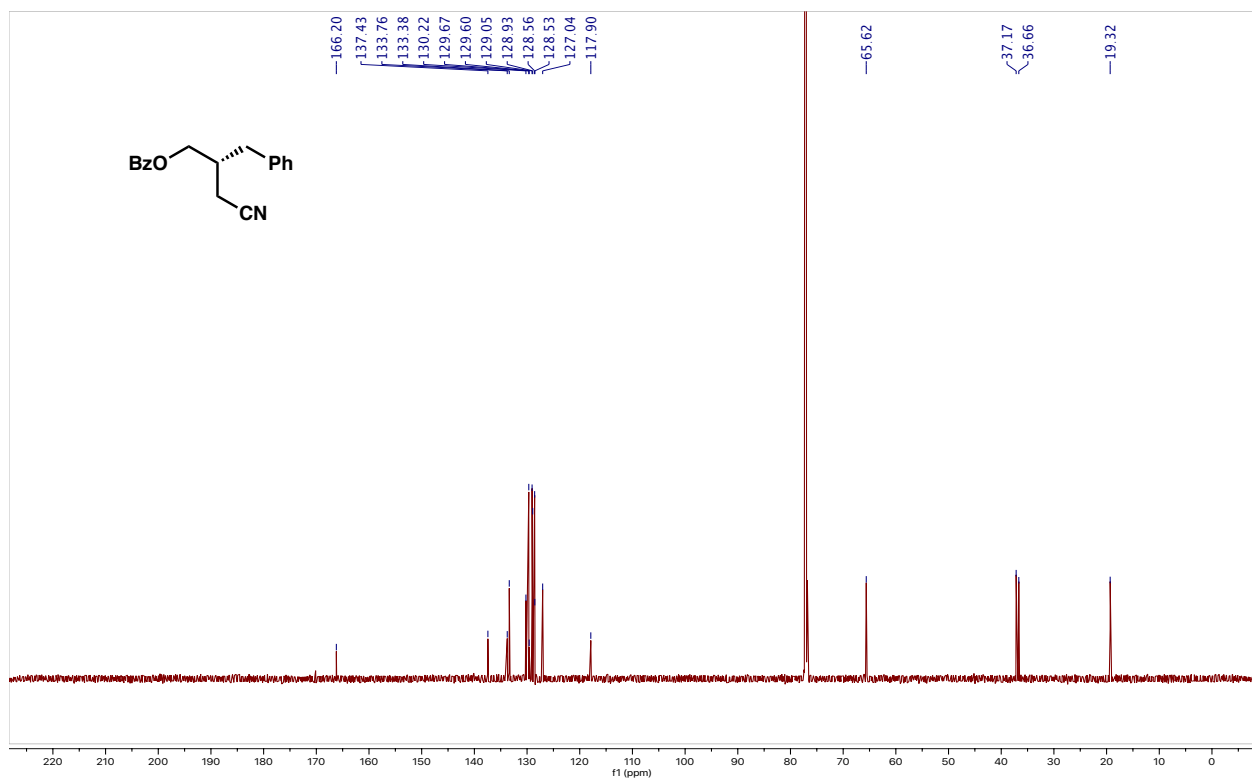

**(-)-Enterolactone, 17 :**

**<sup>1</sup>H NMR (600 MHz, acetone-d<sub>6</sub>)**

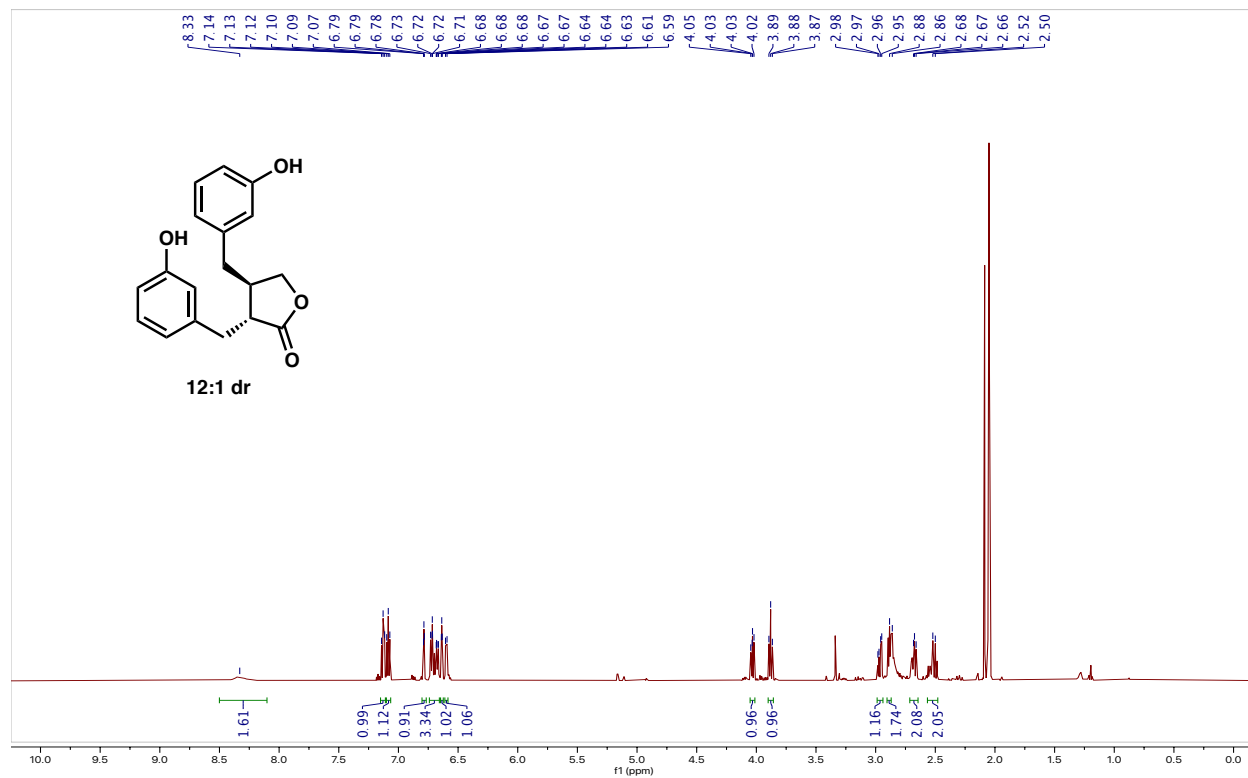

**<sup>13</sup>C NMR (151 MHz, acetone-d<sub>6</sub>)**

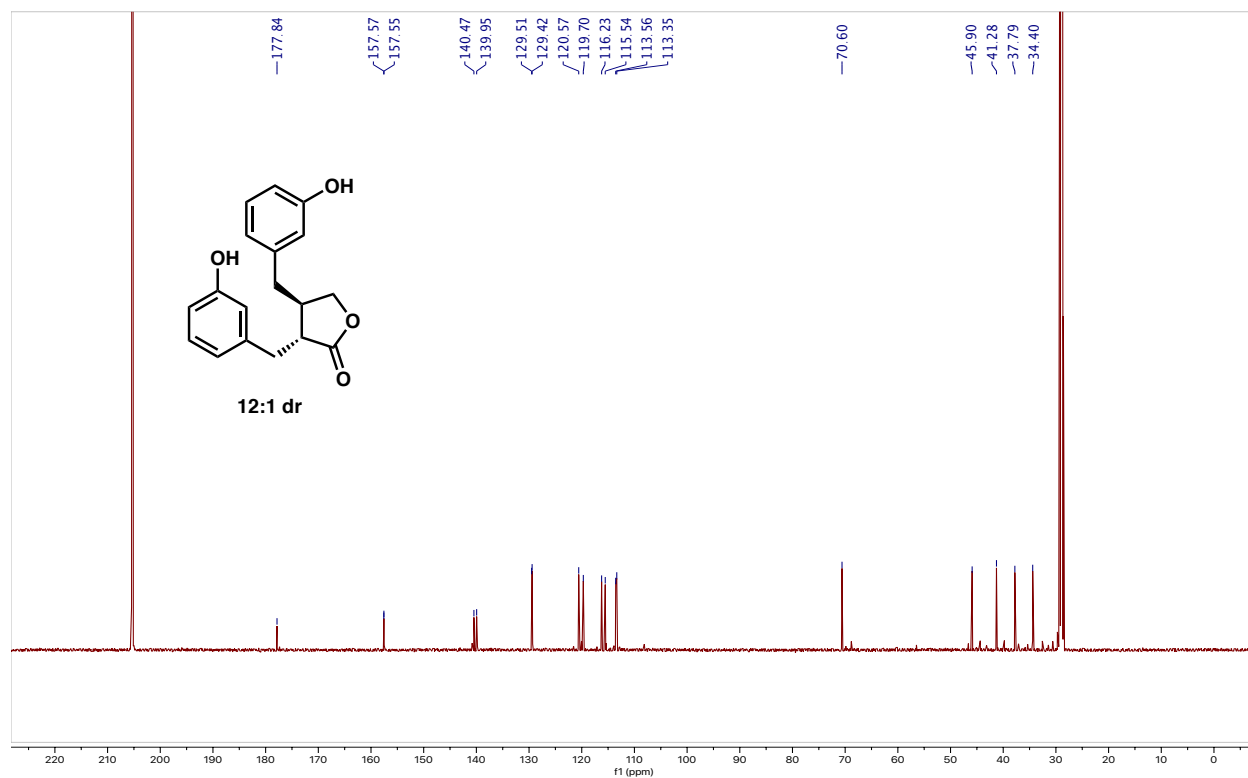



**(-)-Enterodiol, 18**  
**<sup>1</sup>H NMR (600 MHz, CD<sub>3</sub>OD)**

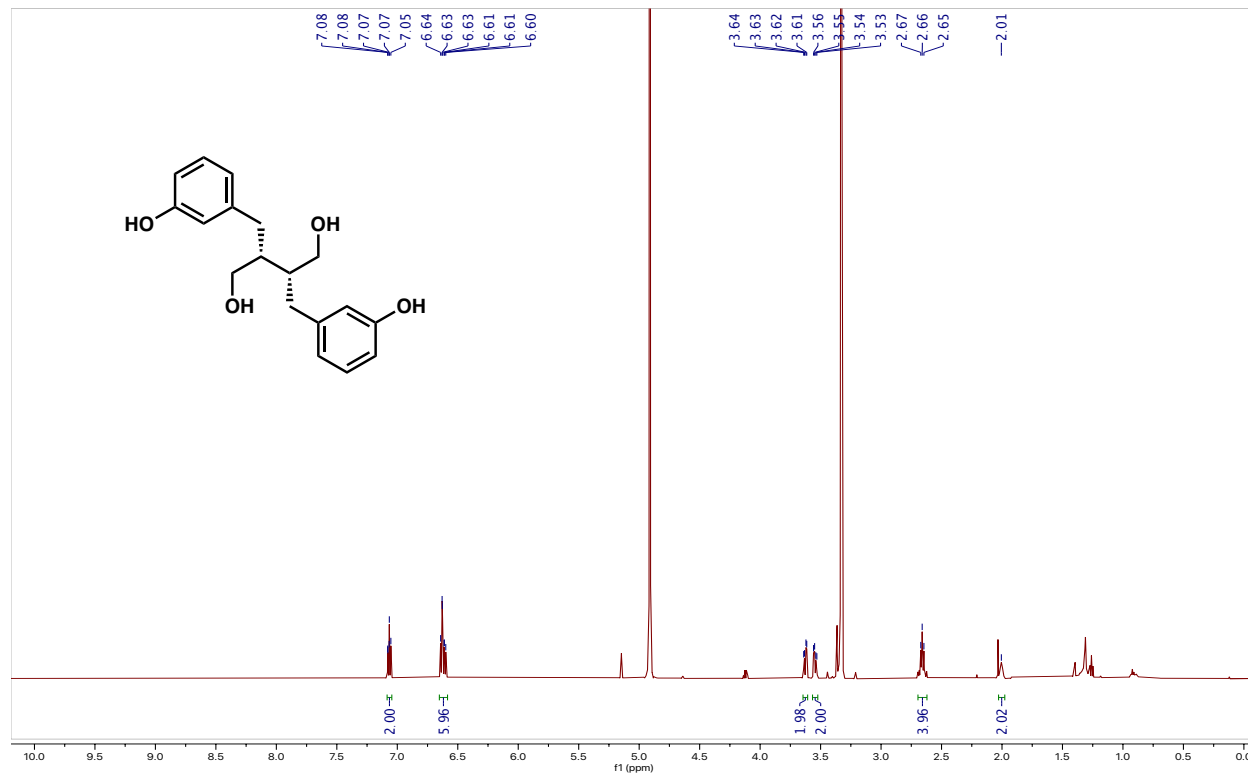

**<sup>13</sup>C NMR (151 MHz, acetone-d<sub>6</sub>)**

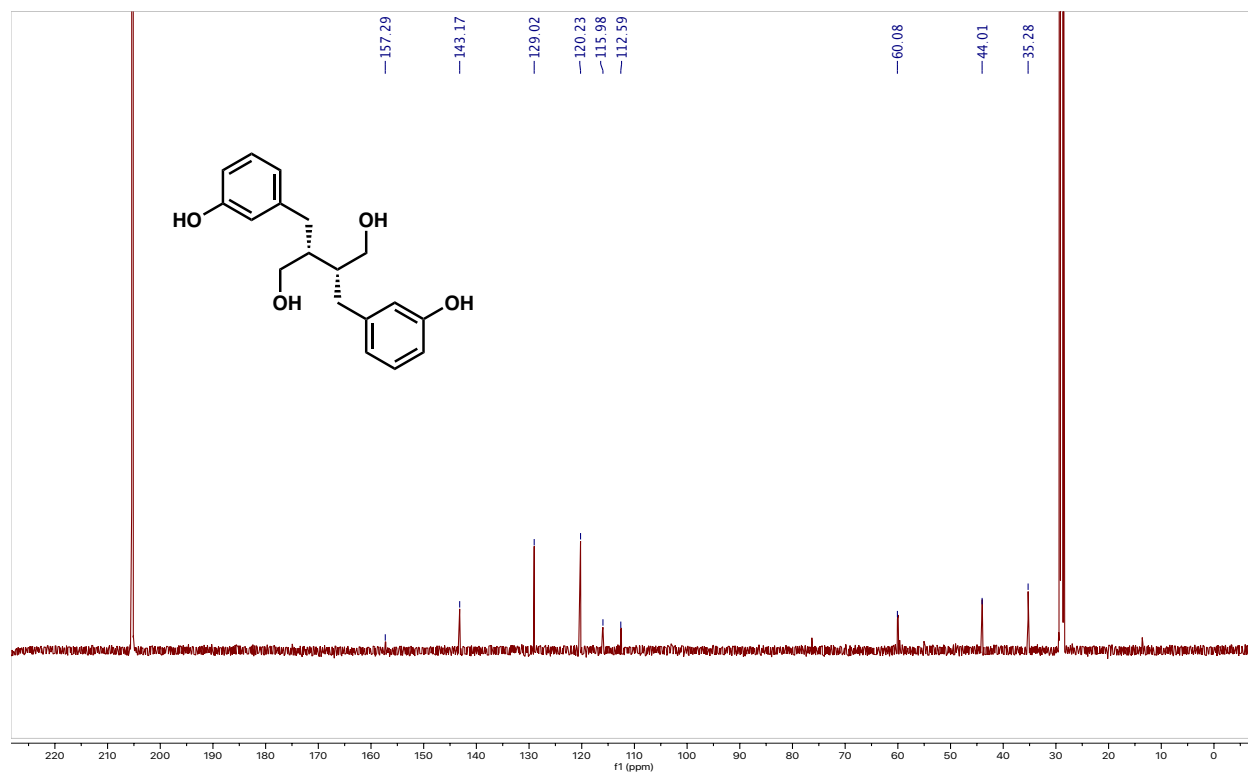

2,2,2-Trifluoroethyl (*R*)-4-oxo-3-((1*R*,2*R*)-2-phenylcyclopropyl)butanoate, *trans*-23:

$^1\text{H}$  NMR (600 MHz,  $\text{C}_6\text{D}_6$ )

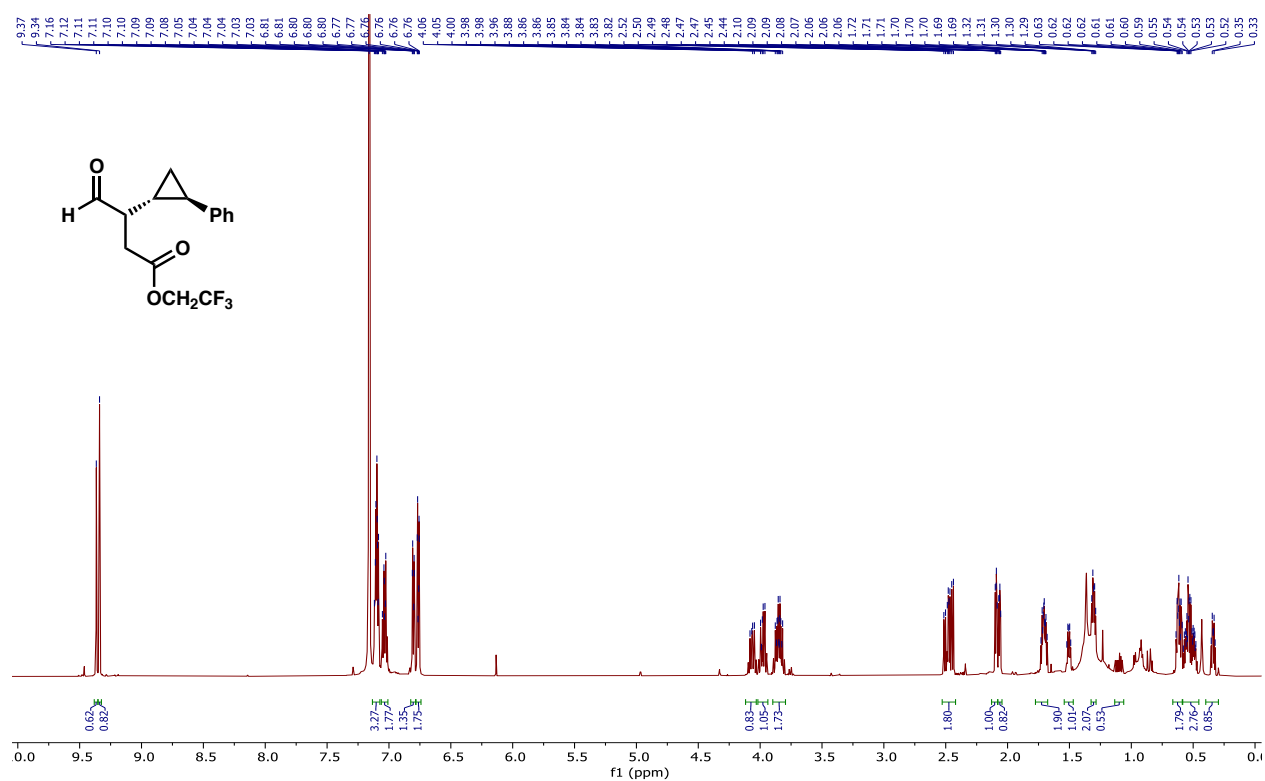

$^{13}\text{C}$  NMR (151 MHz,  $\text{C}_6\text{D}_6$ )

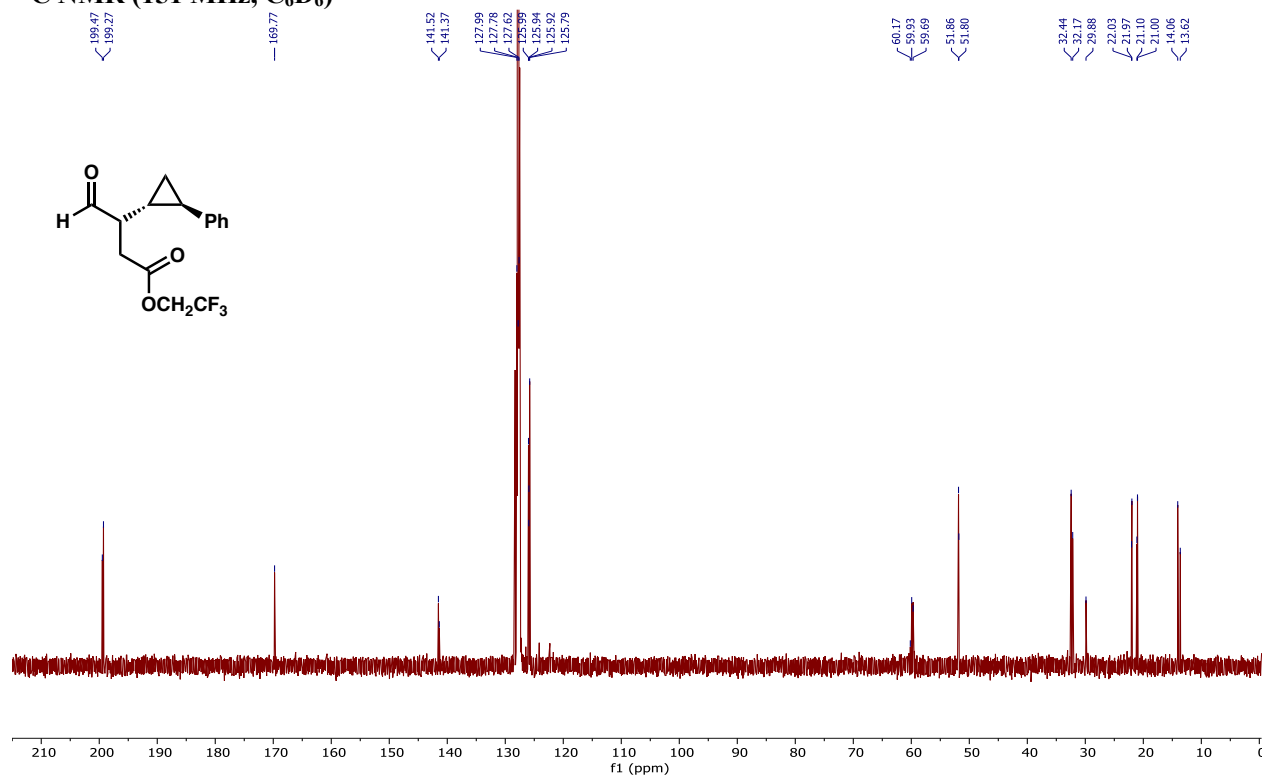

$^{19}\text{F}$  NMR (565 MHz,  $\text{C}_6\text{D}_6$ )

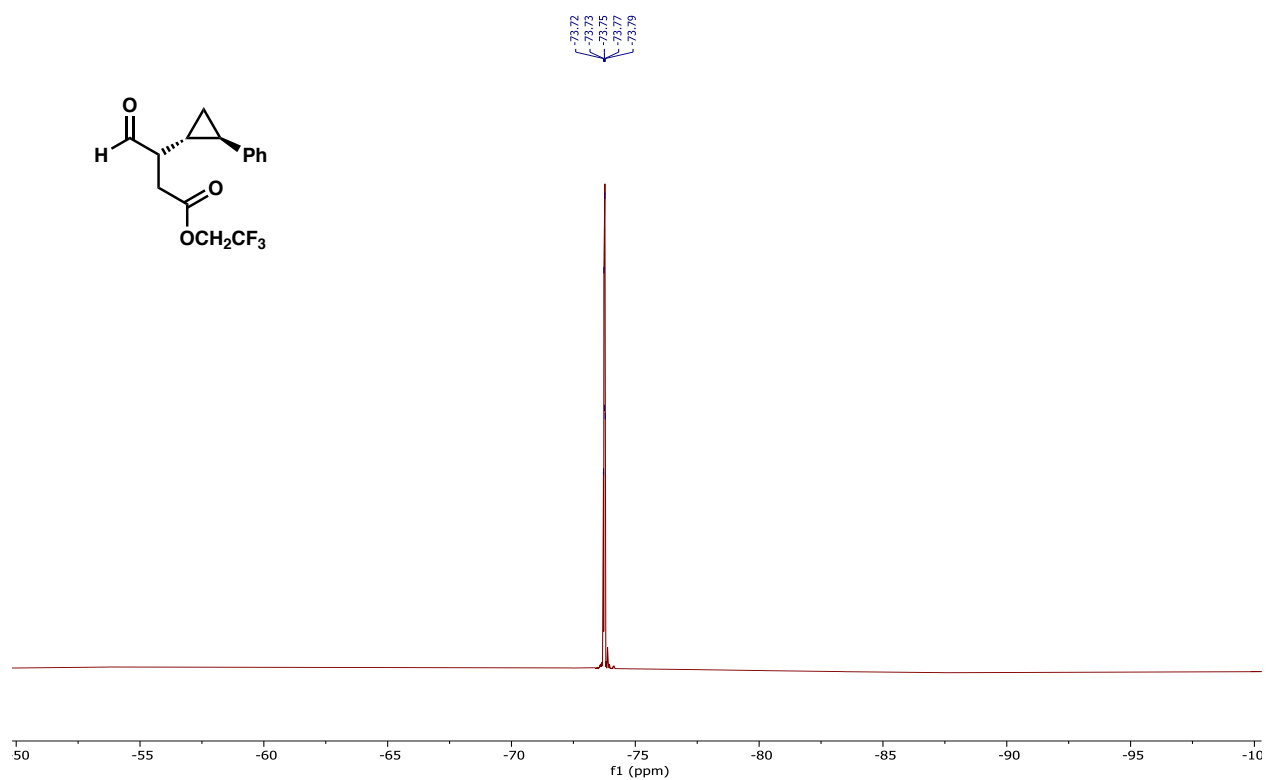

2,2,2-Trifluoroethyl (*R*)-4-oxo-3-((1*R*,2*S*)-2-phenylcyclopropyl)butanoate, *cis*-23:

$^1\text{H}$  NMR (600 MHz,  $\text{C}_6\text{D}_6$ )

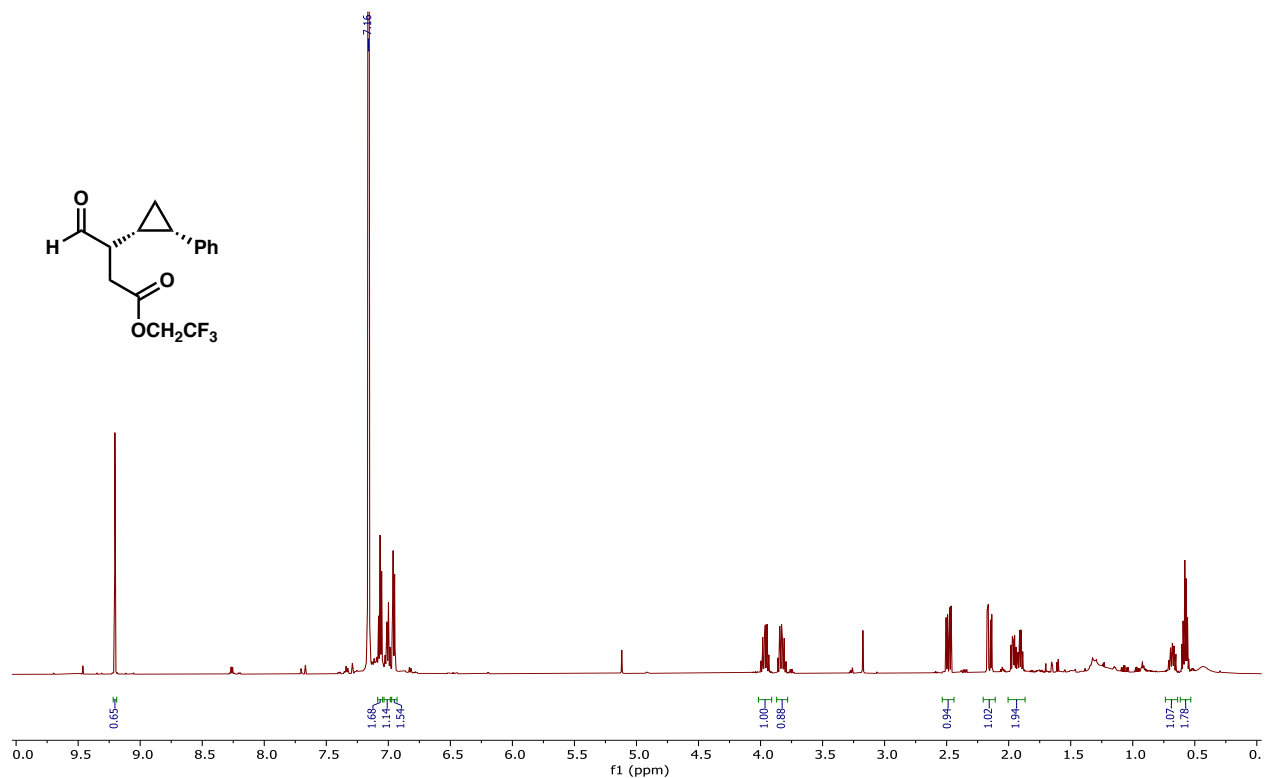

**$^{13}\text{C}$  NMR (151 MHz,  $\text{C}_6\text{D}_6$ )**

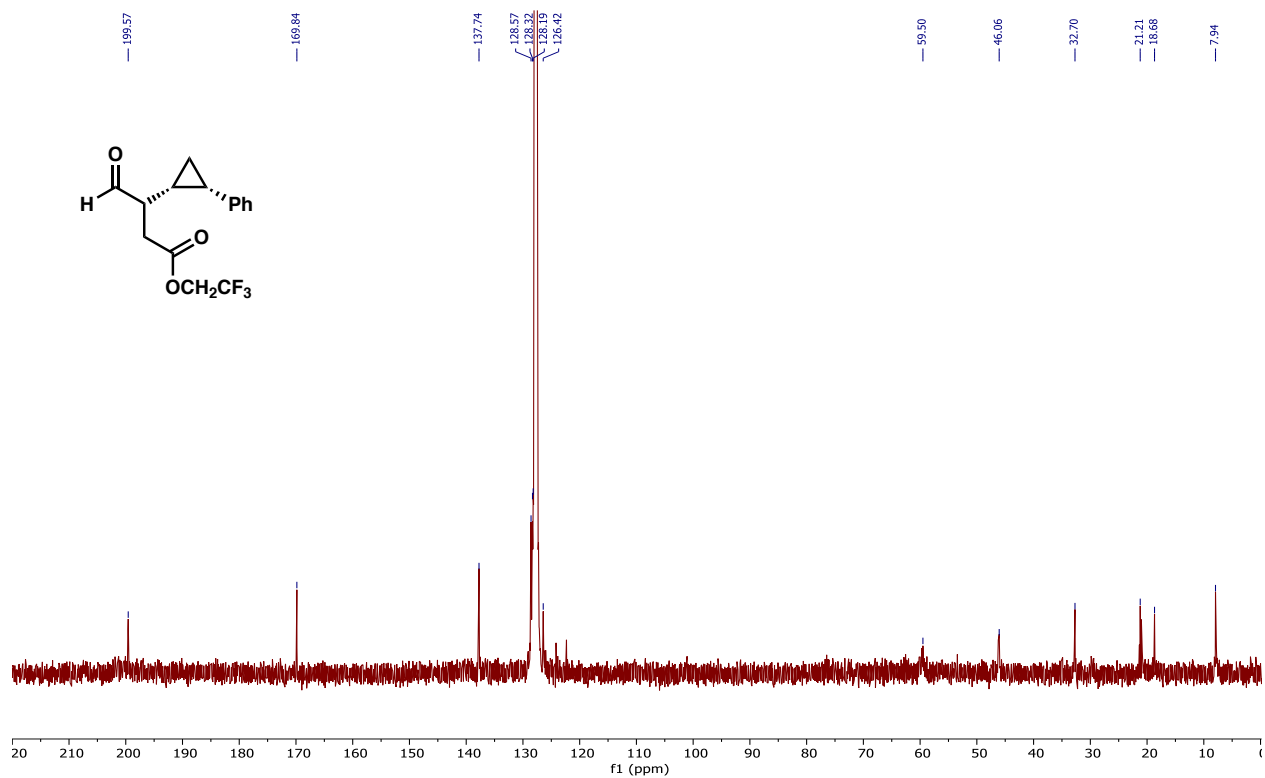

**$^{19}\text{F}$  NMR (565 MHz,  $\text{C}_6\text{D}_6$ )**

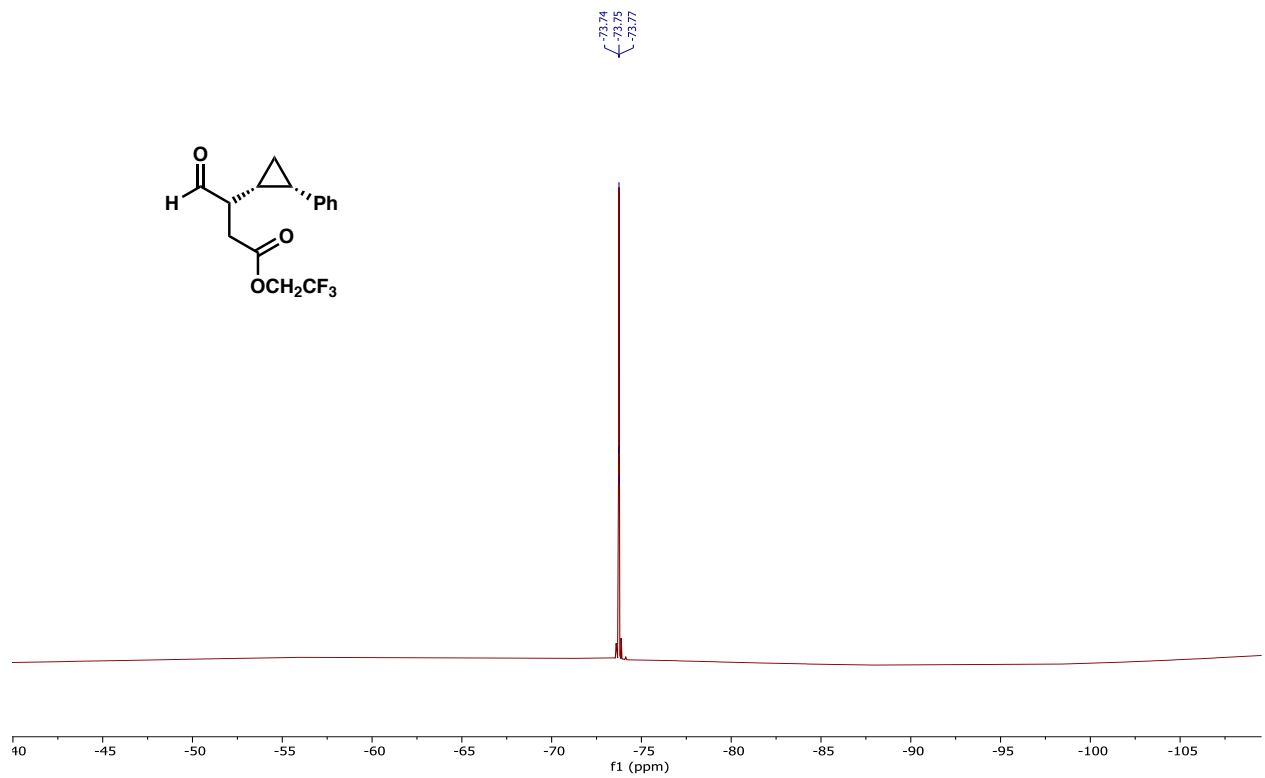

## 10. HPLC Charts

### (R)-4-Benzylidihydrofuran-2(3H)-one, 13aa

HPLC conditions: Chiralpak AD<sub>H</sub> column (25 cm × 0.46 cm ID), Hex/IPA = 95:05, 0.8 mL/min, 210 nm UV detector.

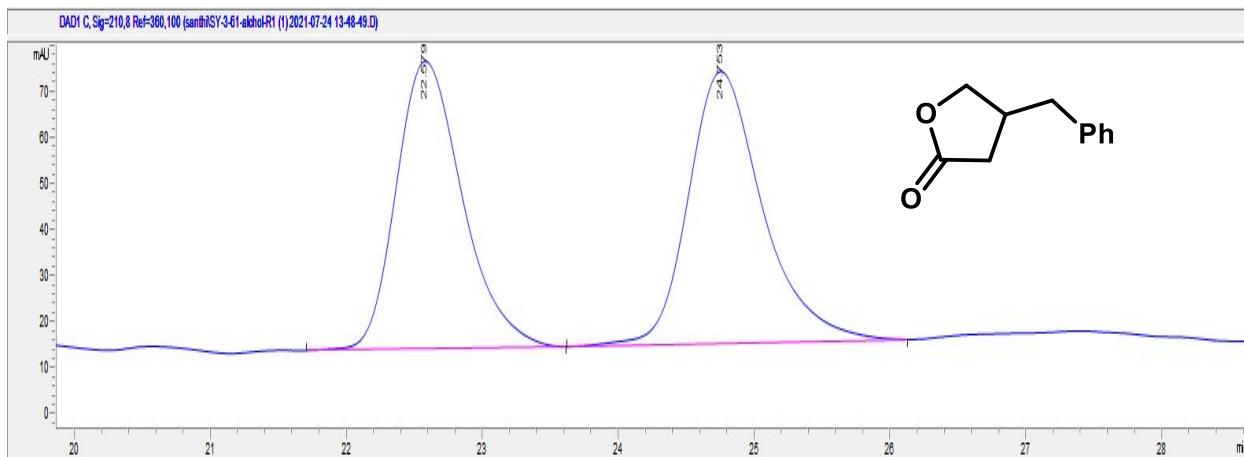

| # | Time   | Type | Area   | Height | Width  | Area%  | Symmetry |
|---|--------|------|--------|--------|--------|--------|----------|
| 1 | 22.579 | BB   | 2103.5 | 62.1   | 0.515  | 48.500 | 0.745    |
| 2 | 24.753 | BB   | 2233.6 | 58.8   | 0.5655 | 51.500 | 0.75     |

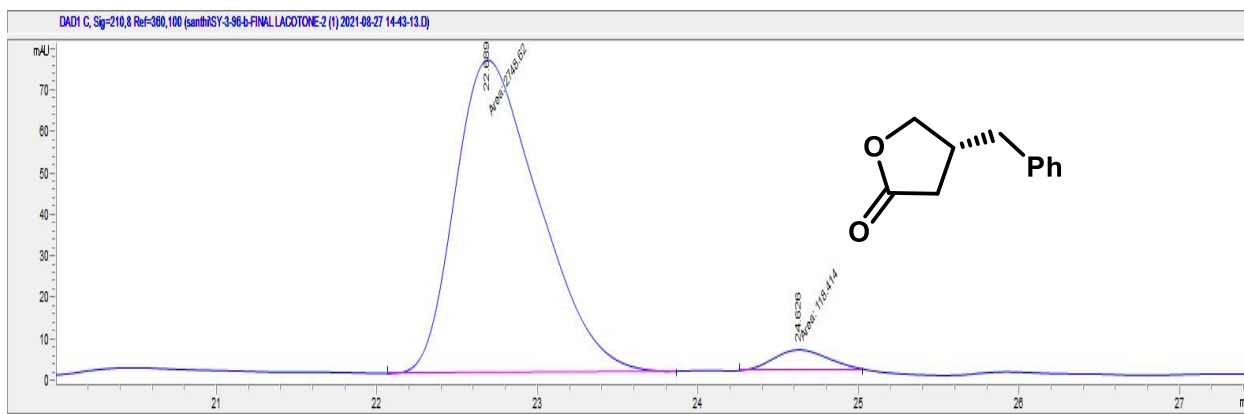

| # | Time   | Type | Area   | Height | Width  | Area%  | Symmetry |
|---|--------|------|--------|--------|--------|--------|----------|
| 1 | 22.689 | MM   | 2748.6 | 75.6   | 0.6057 | 95.870 | 0.627    |
| 2 | 24.626 | MM   | 118.4  | 5      | 0.3949 | 4.130  | 0.883    |

**(R)-2-Butylbutane-1,4-diyl dibenzoate, 13ba:**

HPLC conditions: Chiralpak AD<sub>H</sub> column (25 cm × 0.46 cm ID), Hex/IPA = 95:05, 0.7 mL/min, 230 nm UV detector.

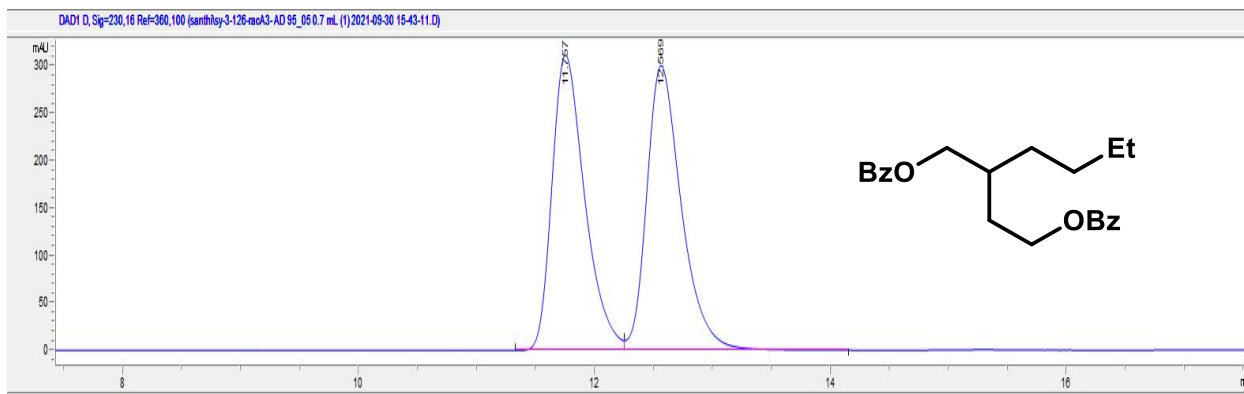

| # | Time   | Type | Area   | Height | Width  | Area%  | Symmetry |
|---|--------|------|--------|--------|--------|--------|----------|
| 1 | 11.757 | BV   | 6014.7 | 311.7  | 0.2941 | 49.496 | 0.66     |
| 2 | 12.569 | VB   | 6137.2 | 300.3  | 0.3094 | 50.504 | 0.662    |

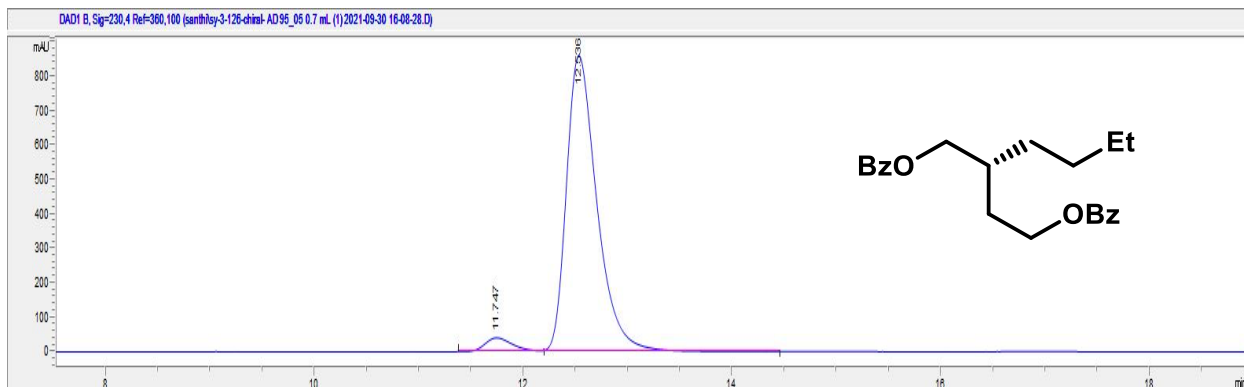

| # | Time   | Type | Area    | Height | Width  | Area%  | Symmetry |
|---|--------|------|---------|--------|--------|--------|----------|
| 1 | 11.747 | BV E | 746.6   | 40.3   | 0.2813 | 4.082  | 0.684    |
| 2 | 12.536 | VB R | 17542.2 | 863.6  | 0.309  | 95.918 | 0.79     |

**(S)-2-Isopropylbutane-1,4-diyl dibenzoate, 13ca:**

HPLC conditions: Chiralpak AD<sub>H</sub> column (25 cm × 0.46 cm ID), Hex/IPA = 95:05, 0.7 mL/min, 230 nm UV detector.

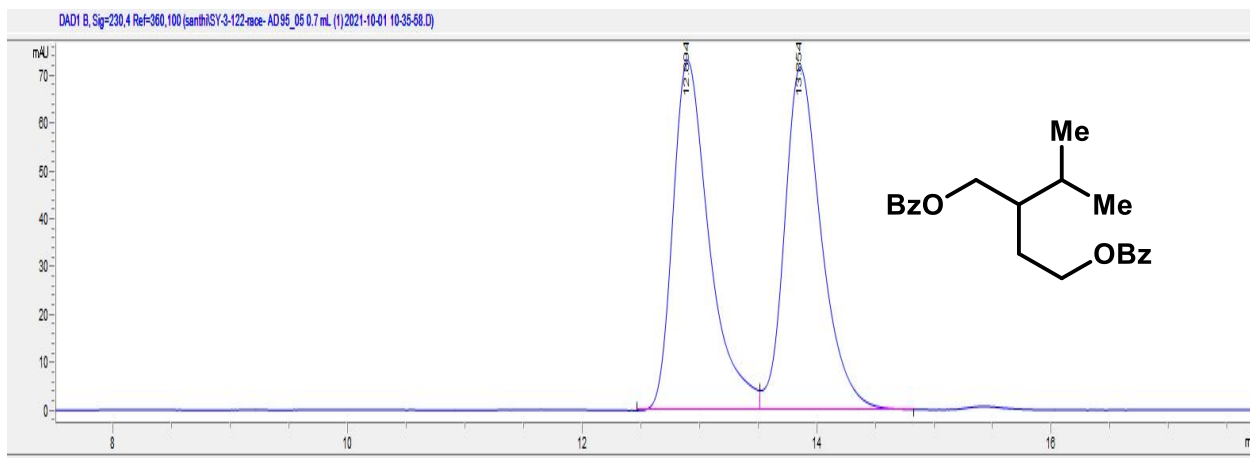

| # | Time   | Type | Area   | Height | Width  | Area%  | Symmetry |
|---|--------|------|--------|--------|--------|--------|----------|
| 1 | 12.894 | BV   | 1572.2 | 72.9   | 0.3265 | 50.288 | 0.625    |
| 2 | 13.854 | VB   | 1554.2 | 71.4   | 0.3278 | 49.712 | 0.698    |

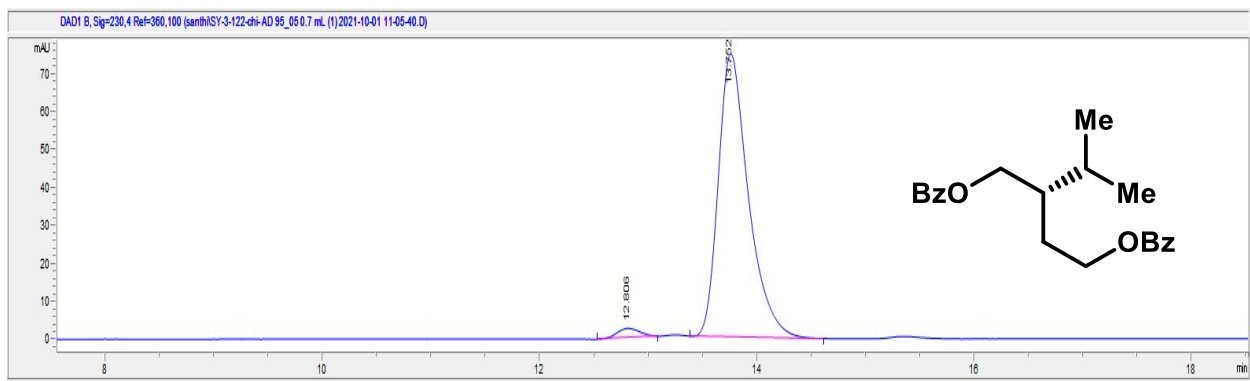

| # | Time   | Type | Area   | Height | Width  | Area%  | Symmetry |
|---|--------|------|--------|--------|--------|--------|----------|
| 1 | 12.806 | BB   | 35.8   | 2.4    | 0.1845 | 2.443  | 0.865    |
| 2 | 13.752 | BB   | 1429.5 | 74.3   | 0.2865 | 97.557 | 0.663    |

### (S)-2-Cyclohexylbutane-1,4-diyl dibenzoate, 13da:

HPLC conditions: Chiralcel OJ\_H column (25 cm × 0.46 cm ID), Hex/IPA = 97:03, 0.6 mL/min, 230 nm UV detector.

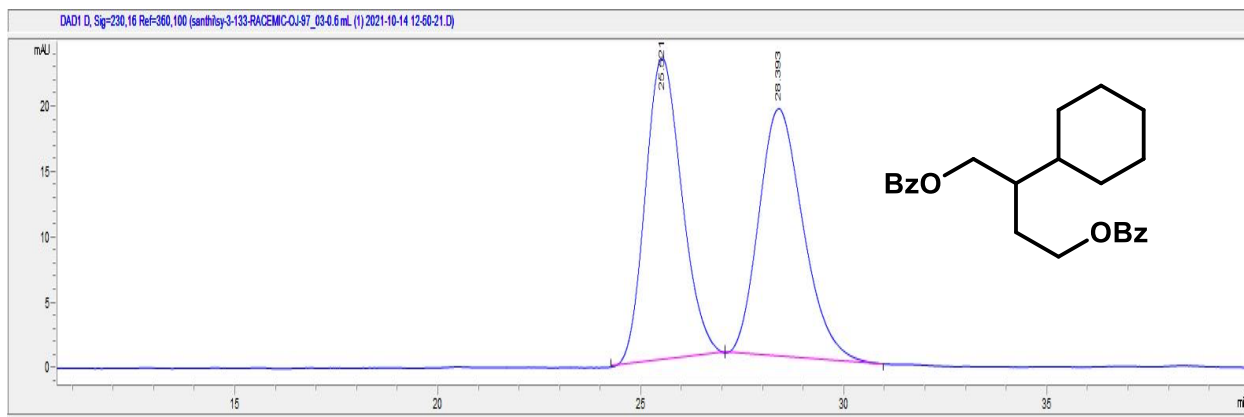

| # | Time   | Type | Area   | Height | Width  | Area%  | Symmetry |
|---|--------|------|--------|--------|--------|--------|----------|
| 1 | 25.521 | BB   | 1449.4 | 23.2   | 0.7581 | 50.122 | 0.842    |
| 2 | 28.393 | BB   | 1442.3 | 18.9   | 0.8973 | 49.878 | 0.786    |

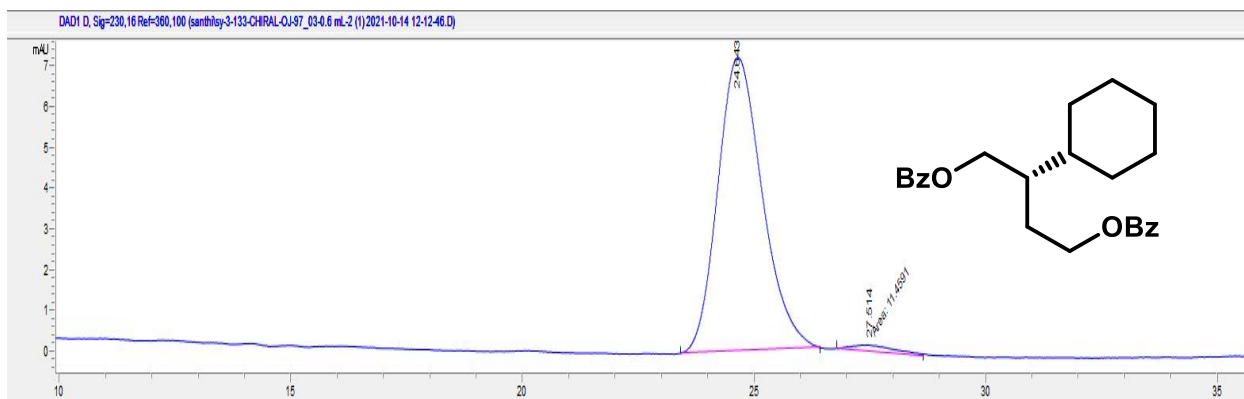

| # | Time   | Type | Area  | Height | Width  | Area%  | Symmetry |
|---|--------|------|-------|--------|--------|--------|----------|
| 1 | 24.643 | BB   | 482.6 | 7.2    | 0.7836 | 97.681 | 0.831    |
| 2 | 27.514 | MM   | 11.5  | 1.7E-1 | 1.1475 | 2.319  | 0.529    |



**Benzyl (S)-((5-oxotetrahydrofuran-3-yl)methyl)carbamate, 13fa:**

HPLC conditions: Chiralcel OJ\_H column (25 cm × 0.46 cm ID), Hex/IPA = 70:30, 0.8 mL/min, 230 nm UV detector.

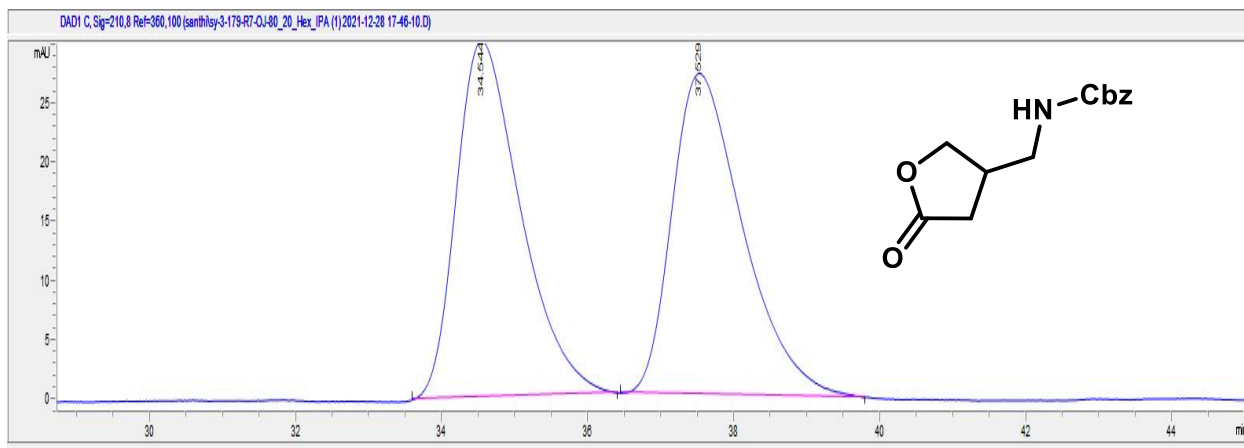

| # | Time   | Type | Area   | Height | Width  | Area%  | Symmetry |
|---|--------|------|--------|--------|--------|--------|----------|
| 1 | 34.544 | BB   | 1855   | 30.2   | 0.7256 | 50.141 | 0.632    |
| 2 | 37.529 | BB   | 1844.6 | 27.2   | 0.8059 | 49.859 | 0.602    |

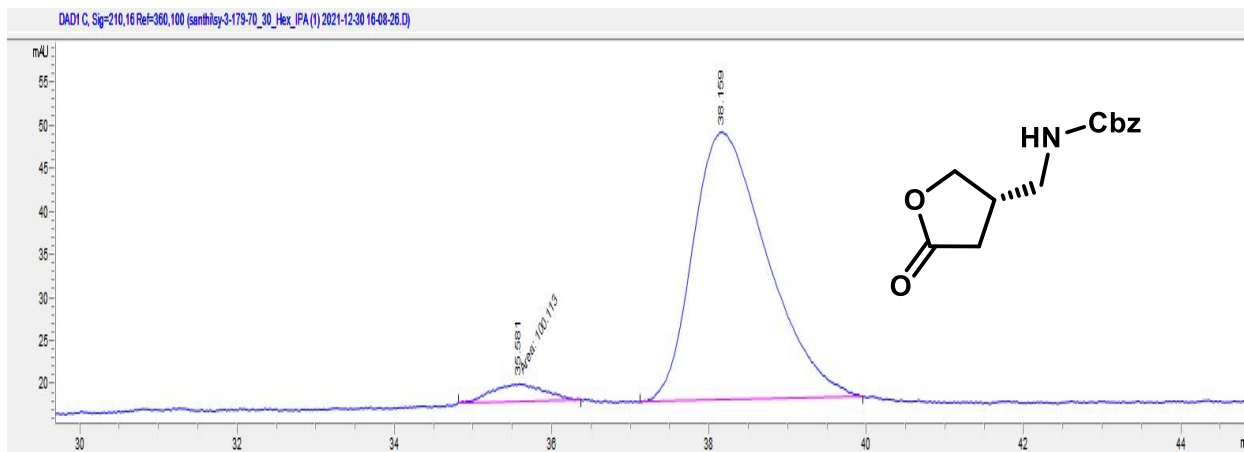

| # | Time   | Type | Area   | Height | Width  | Area%  | Symmetry |
|---|--------|------|--------|--------|--------|--------|----------|
| 1 | 35.581 | MM   | 100.1  | 2.1    | 0.7922 | 4.691  | 1.183    |
| 2 | 38.159 | VV R | 2033.8 | 31     | 0.7703 | 95.309 | 0.637    |

**(2R)-2-Benzyl-3-methylbutane-1,4-diyl dibenzoate, 13ga:**

HPLC conditions: Chiralpak IC column (25 cm × 0.46 cm ID), Hex/IPA = 95:05, 0.8 mL/min, 230 nm UV detector.

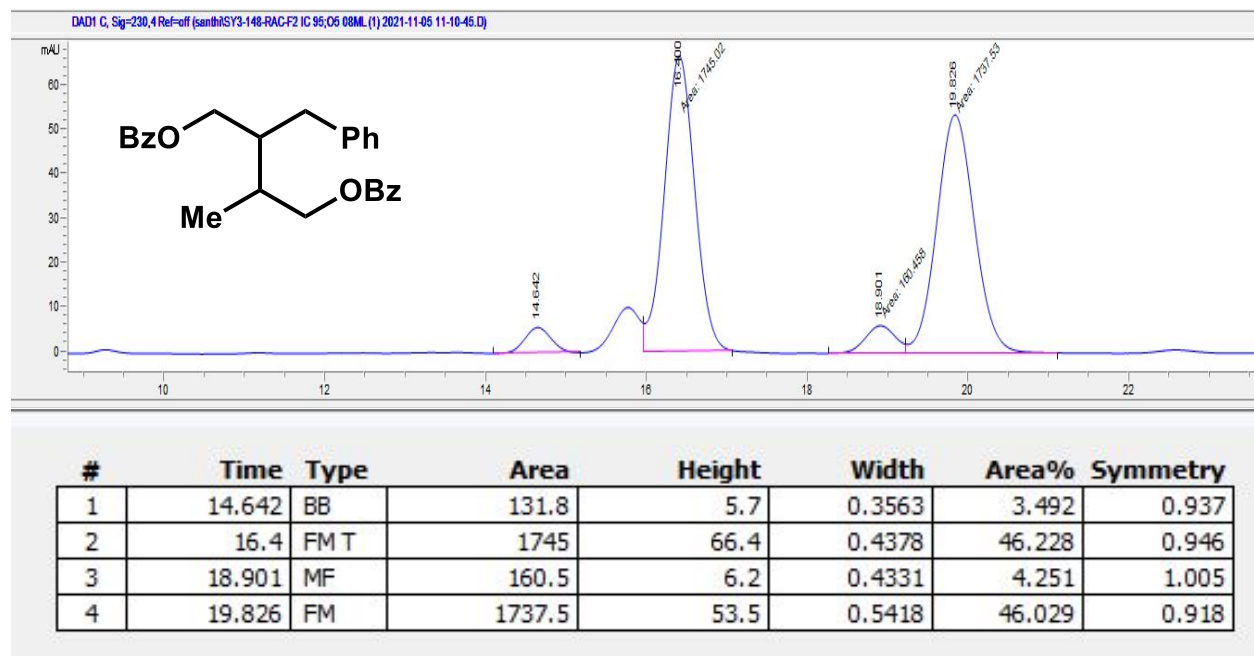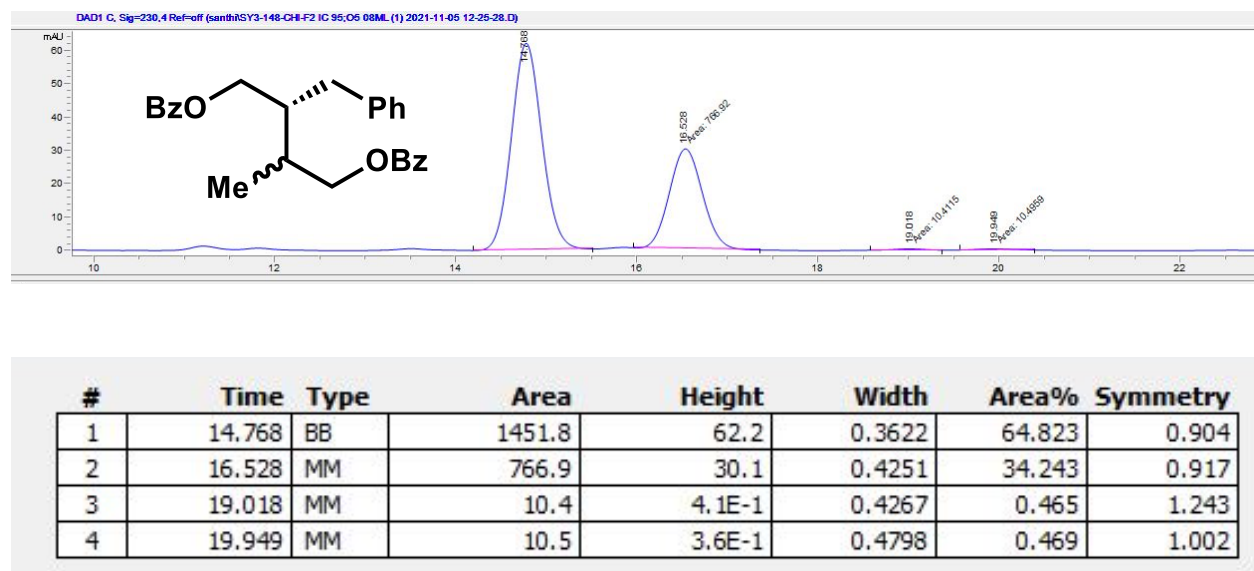

**(2R)-2-Benzyl-3-isopropylbutane-1,4-diyl dibenzoate, 13ha:**

HPLC conditions: Chiralpak AD-H column (25 cm × 0.46 cm ID), Hex/IPA = 95:5, 0.8 mL/min, 230 nm UV detector.

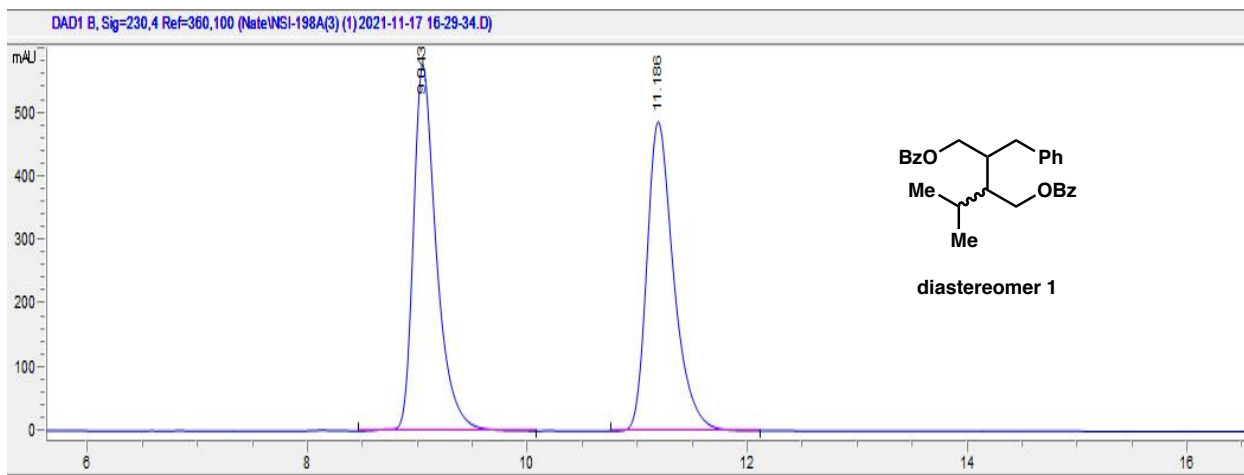

| # | Time   | Type | Area   | Height | Width  | Area%  | Symmetry |
|---|--------|------|--------|--------|--------|--------|----------|
| 1 | 9.043  | BB   | 8395.8 | 576.4  | 0.2169 | 50.418 | 0.639    |
| 2 | 11.186 | BB   | 8256.6 | 487.1  | 0.2568 | 49.582 | 0.683    |

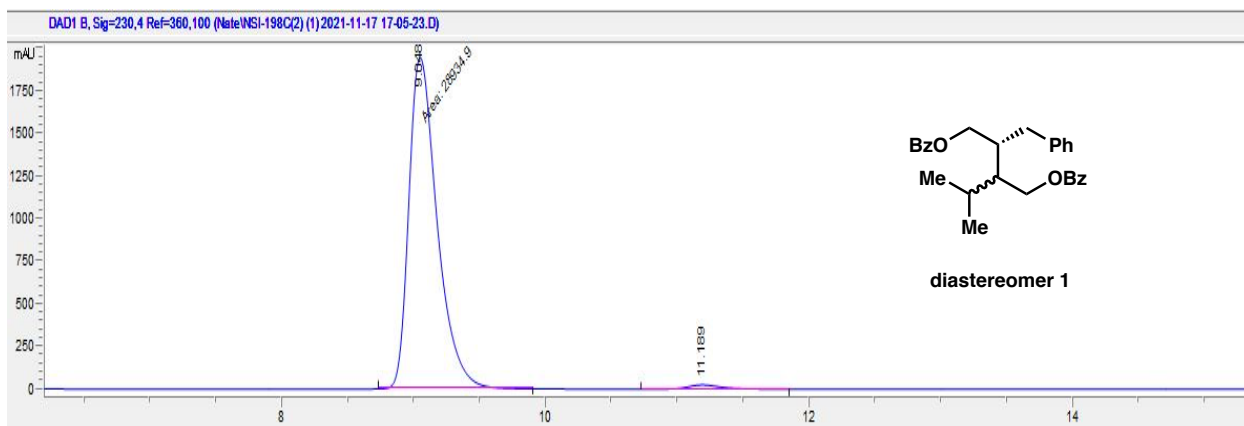

| # | Time   | Type | Area    | Height | Width  | Area%  | Symmetry |
|---|--------|------|---------|--------|--------|--------|----------|
| 1 | 9.048  | MM   | 28934.9 | 1940.1 | 0.2486 | 98.572 | 0.635    |
| 2 | 11.189 | BB   | 419.1   | 24.6   | 0.2534 | 1.428  | 0.707    |

**(2R)-2-Benzyl-3-isopropylbutane-1,4-diyl dibenzoate, 13hb:**

HPLC conditions: Chiralpak IC column (25 cm × 0.46 cm ID), Hex/IPA = 98:2, 0.5 mL/min, 230 nm UV detector.

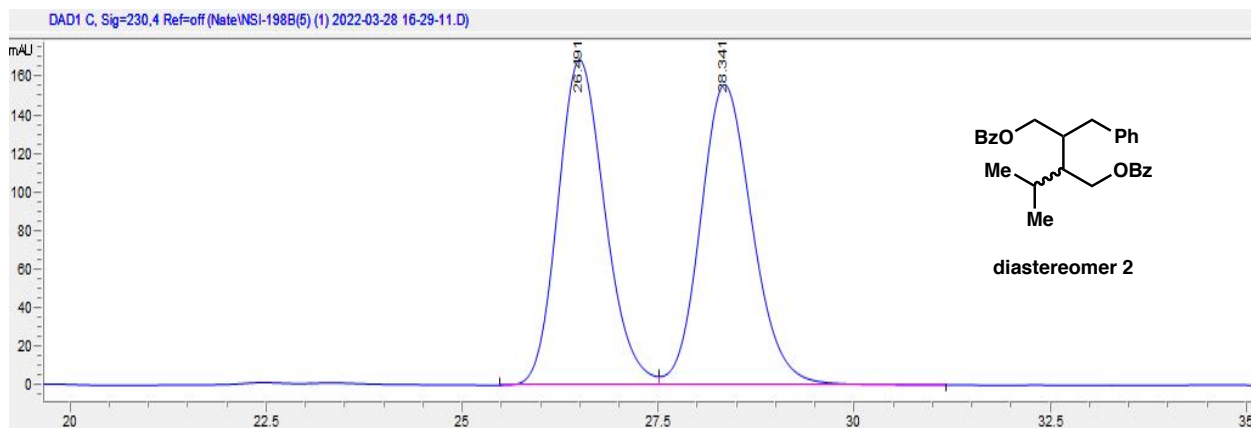

| # | Time   | Type | Area   | Height | Width  | Area%  | Symmetry |
|---|--------|------|--------|--------|--------|--------|----------|
| 1 | 26.491 | BV   | 7070.8 | 169.4  | 0.6469 | 49.552 | 0.816    |
| 2 | 28.341 | VB   | 7198.6 | 156.5  | 0.7127 | 50.448 | 0.825    |

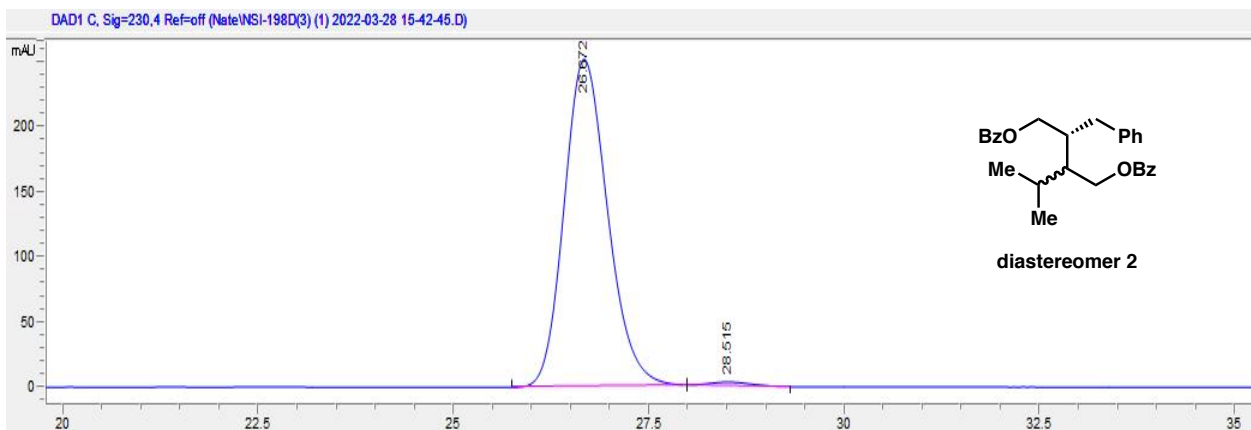

| # | Time   | Type | Area   | Height | Width  | Area%  | Symmetry |
|---|--------|------|--------|--------|--------|--------|----------|
| 1 | 26.672 | BB   | 9754.5 | 251.7  | 0.6022 | 99.017 | 0.813    |
| 2 | 28.515 | BB   | 96.9   | 2.8    | 0.5148 | 0.983  | 0.759    |

### (4R)-3,4-Dibenzylidihydrofuran-2(3H)-one, 13ia:

HPLC conditions: Chiralpak IC column (25 cm × 0.46 cm ID), Hex/IPA = 90:10, 0.8 mL/min, 210 nm UV detector.

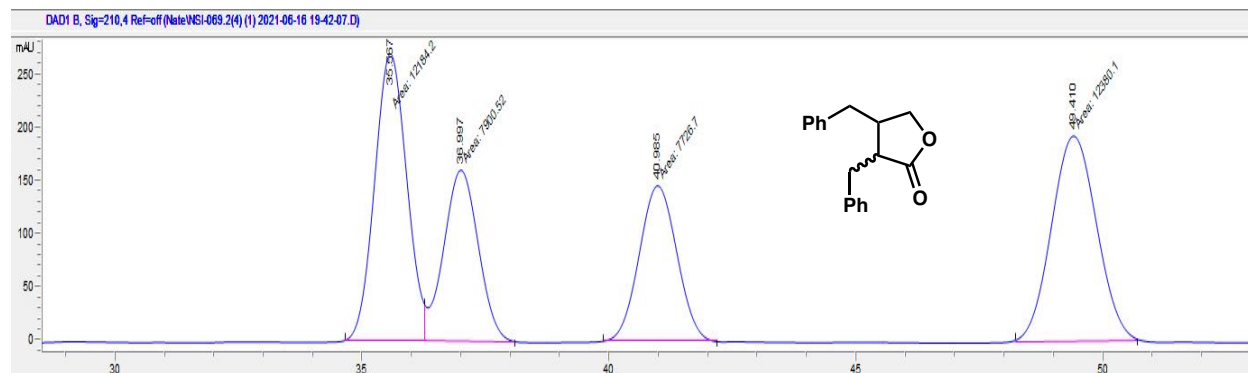

| # | Time   | Type | Area    | Height | Width  | Area%  | Symmetry |
|---|--------|------|---------|--------|--------|--------|----------|
| 1 | 35.567 | MM   | 12184.2 | 269.7  | 0.753  | 30.315 | 0.947    |
| 2 | 36.997 | MM   | 7900.5  | 160.8  | 0.8187 | 19.657 | 0.967    |
| 3 | 40.985 | MM   | 7726.7  | 145.8  | 0.8835 | 19.225 | 0.944    |
| 4 | 49.41  | MM   | 12380.1 | 193.5  | 1.0662 | 30.803 | 0.94     |

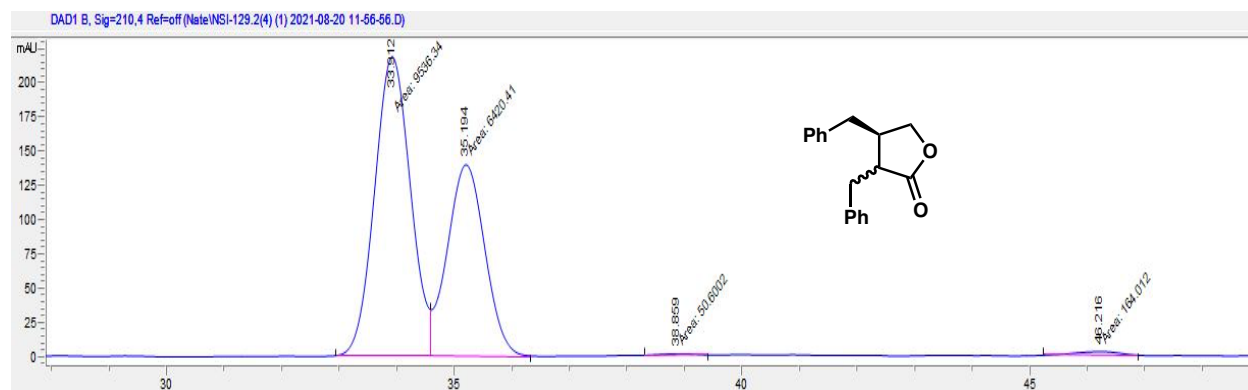

| # | Time   | Type | Area   | Height | Width  | Area%  | Symmetry |
|---|--------|------|--------|--------|--------|--------|----------|
| 1 | 33.912 | MM   | 9536.3 | 219.6  | 0.7237 | 58.971 | 0.947    |
| 2 | 35.194 | MM   | 6420.4 | 140.8  | 0.7599 | 39.702 | 0.951    |
| 3 | 38.859 | MM   | 50.6   | 1.2    | 0.7092 | 0.313  | 1.127    |
| 4 | 46.216 | MM   | 164    | 2.9    | 0.9364 | 1.014  | 1.345    |

**(2R)-2-Benzyl-3-(2-(methylthio)ethyl)butane-1,4-diyl dibenzoate, 13ja:**

HPLC conditions: Chiralpak IC column (25 cm × 0.46 cm ID), Hex/IPA = 95:5, 0.8 mL/min, 230 nm UV detector.

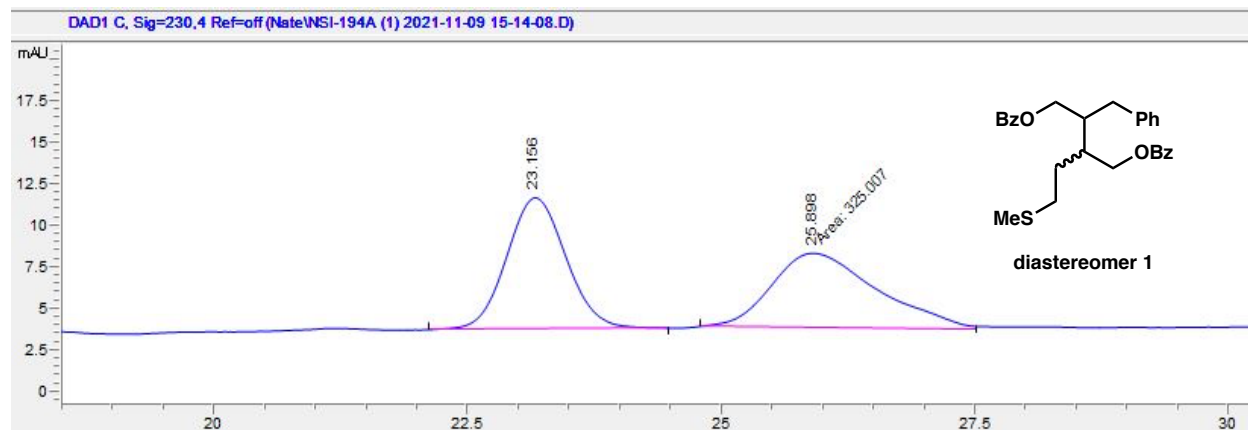

| # | Time   | Type | Area | Height | Width  | Area%  | Symmetry |
|---|--------|------|------|--------|--------|--------|----------|
| 1 | 23.156 | BB   | 322  | 7.9    | 0.6225 | 49.769 | 0.913    |
| 2 | 25.898 | MM   | 325  | 4.5    | 1.2059 | 50.231 | 0.644    |

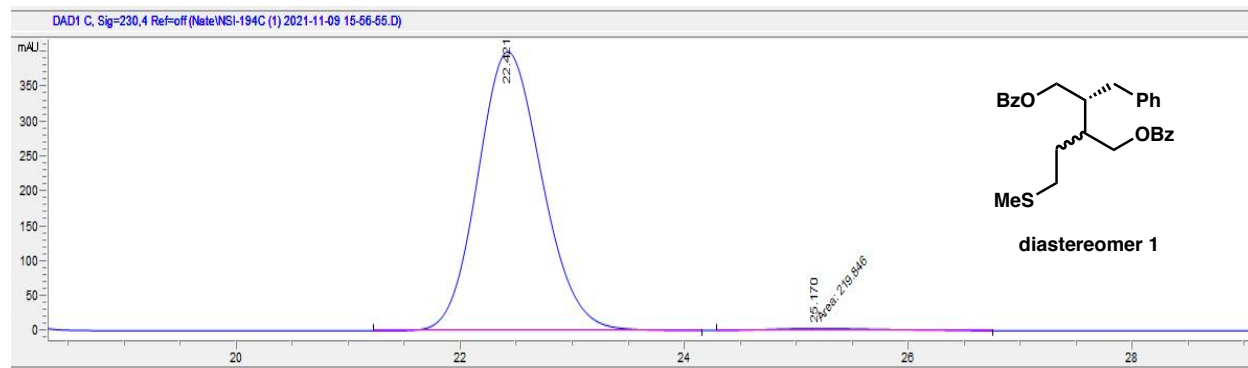

| # | Time   | Type | Area    | Height | Width  | Area%  | Symmetry |
|---|--------|------|---------|--------|--------|--------|----------|
| 1 | 22.421 | BB   | 15993.2 | 400.6  | 0.6217 | 98.644 | 0.843    |
| 2 | 25.17  | MM   | 219.8   | 2.9    | 1.2449 | 1.356  | 0.559    |

**(2R)-2-Benzyl-3-(2-(methylthio)ethyl)butane-1,4-diyl dibenzoate , 13jb:**

HPLC conditions: Chiralpak IC column (25 cm × 0.46 cm ID), Hex/IPA = 95:5, 0.8 mL/min, 230 nm UV detector.

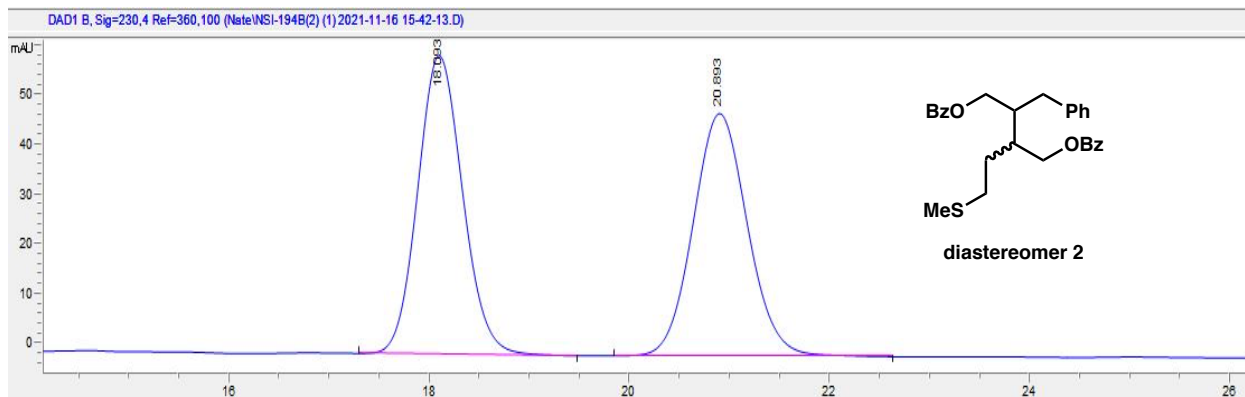

| # | Time   | Type | Area   | Height | Width  | Area%  | Symmetry |
|---|--------|------|--------|--------|--------|--------|----------|
| 1 | 18.093 | BB   | 1871.8 | 60.1   | 0.4853 | 50.432 | 0.876    |
| 2 | 20.893 | BB   | 1839.7 | 48.8   | 0.5839 | 49.568 | 0.913    |

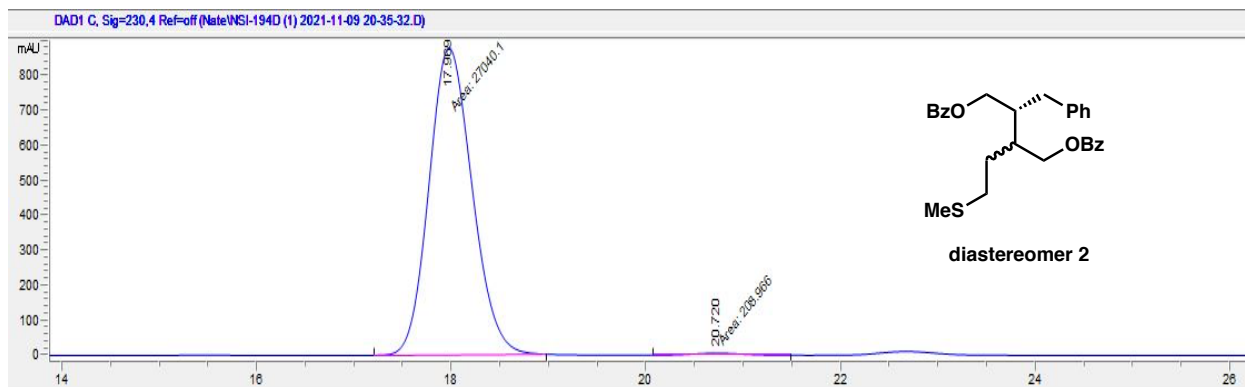

| # | Time   | Type | Area    | Height | Width  | Area%  | Symmetry |
|---|--------|------|---------|--------|--------|--------|----------|
| 1 | 17.969 | MM   | 27040.1 | 877.8  | 0.5134 | 99.233 | 0.847    |
| 2 | 20.72  | MM   | 209     | 5.8    | 0.5983 | 0.767  | 0.879    |



**(4R)-4-Benzyl-3-(4-hydroxybenzyl)dihydrofuran-2(3H)-one, 13ka:**

HPLC conditions: Chiralpak IC column (25 cm × 0.46 cm ID), Hex/IPA = 80:20, 0.9 mL/min, 230 nm UV detector.

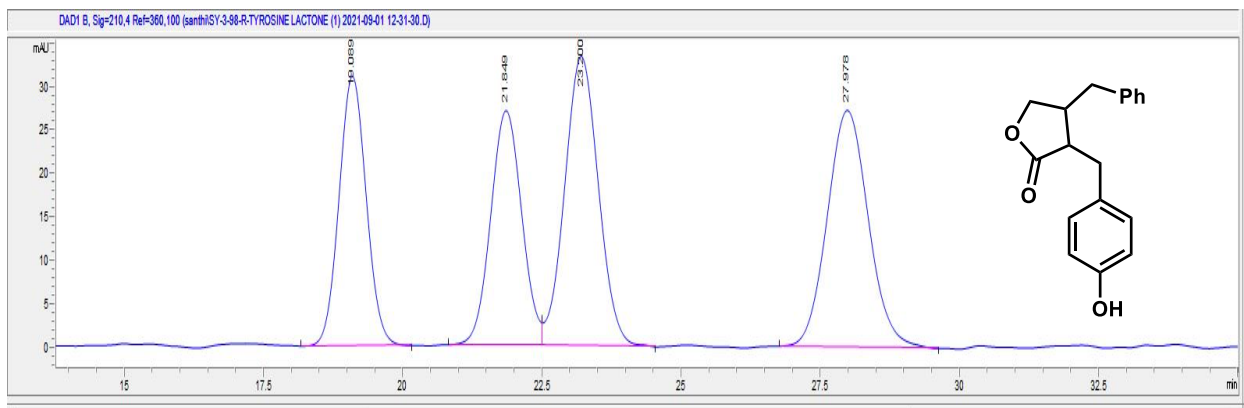

| # | Time   | Type | Area   | Height | Width  | Area%  | Symmetry |
|---|--------|------|--------|--------|--------|--------|----------|
| 1 | 19.089 | BB   | 1059.2 | 31.1   | 0.5268 | 21.474 | 0.936    |
| 2 | 21.849 | BV   | 1053.9 | 27.1   | 0.5998 | 21.367 | 0.958    |
| 3 | 23.2   | VB   | 1412.8 | 33.5   | 0.6527 | 28.644 | 0.934    |
| 4 | 27.978 | BB   | 1406.5 | 27.3   | 0.8023 | 28.516 | 0.916    |

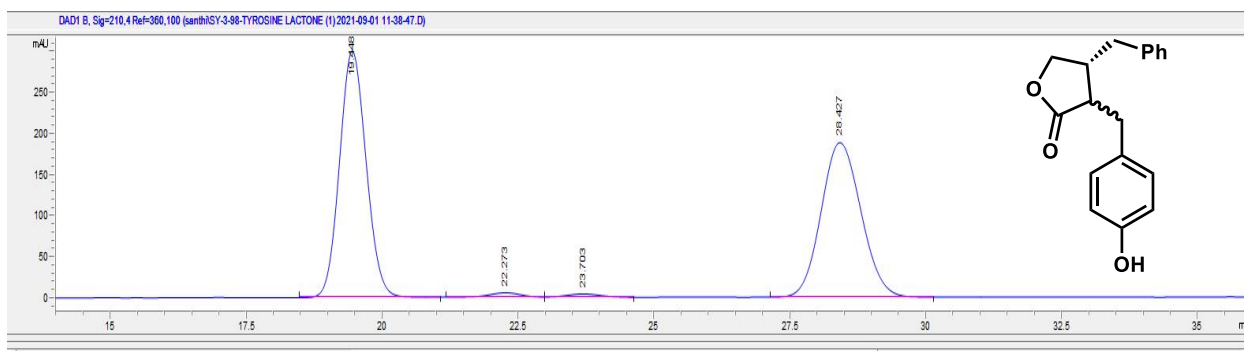

| # | Time   | Type | Area    | Height | Width  | Area%  | Symmetry |
|---|--------|------|---------|--------|--------|--------|----------|
| 1 | 19.448 | BB   | 10256.3 | 301.4  | 0.531  | 50.645 | 0.884    |
| 2 | 22.273 | BB   | 206.3   | 5.3    | 0.5783 | 1.019  | 1.146    |
| 3 | 23.703 | BB   | 160.5   | 3.9    | 0.53   | 0.793  | 0.937    |
| 4 | 28.427 | BB   | 9628.3  | 188.9  | 0.8025 | 47.544 | 0.866    |



**(4R)-4-Benzyl-3-(3-hydroxybenzyl)dihydrofuran-2(3H)-one, 13la:**

HPLC conditions: Chiralcel OJ-H column (25 cm × 0.46 cm ID), Hex/IPA = 80:20, 0.8 mL/min, 210 nm UV detector.

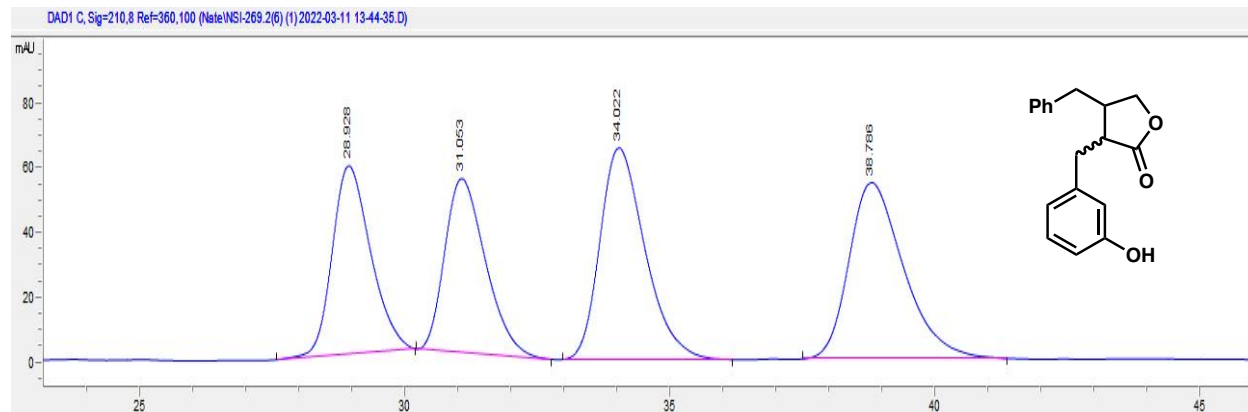

| # | Time   | Type | Area   | Height | Width  | Area%  | Symmetry |
|---|--------|------|--------|--------|--------|--------|----------|
| 1 | 28.928 | BB   | 2915.1 | 57.8   | 0.6643 | 21.611 | 0.739    |
| 2 | 31.053 | BB   | 2855.7 | 53.4   | 0.6722 | 21.171 | 0.671    |
| 3 | 34.022 | BB   | 3839.1 | 64.9   | 0.8108 | 28.461 | 0.696    |
| 4 | 38.786 | BB   | 3879   | 54.1   | 0.8574 | 28.757 | 0.688    |

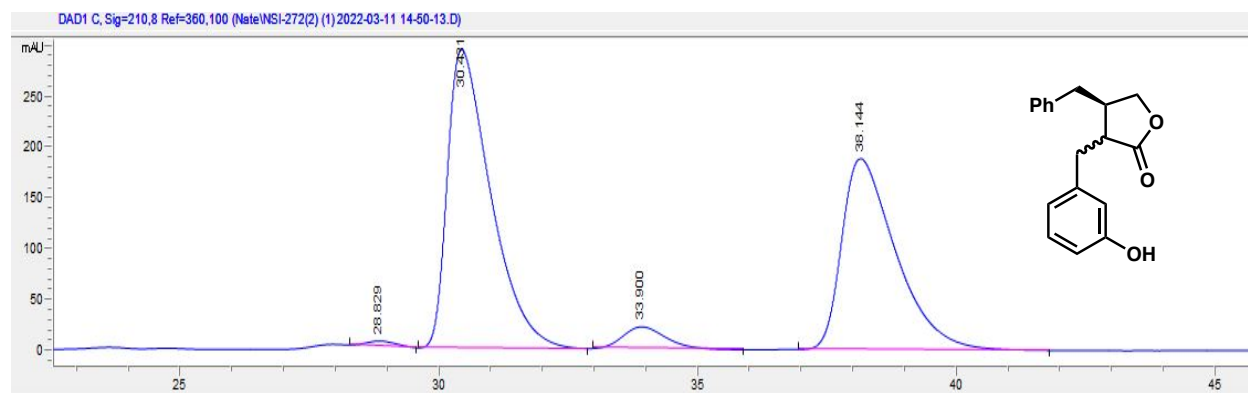

| # | Time   | Type | Area    | Height | Width  | Area%  | Symmetry |
|---|--------|------|---------|--------|--------|--------|----------|
| 1 | 28.829 | BB   | 194.3   | 5.1    | 0.4554 | 0.604  | 0.712    |
| 2 | 30.431 | BB   | 17071   | 292.9  | 0.839  | 53.073 | 0.462    |
| 3 | 33.9   | BB   | 1257.3  | 21.6   | 0.6852 | 3.909  | 0.733    |
| 4 | 38.144 | BB   | 13642.2 | 187.6  | 1.0115 | 42.414 | 0.506    |

## (R)-2-Benzyl-4-oxo-4-phenylbutanal, 15a

HPLC conditions: Chiralpak IC column (25 cm × 0.46 cm ID), Hex/IPA = 90:10, 0.8 mL/min, 220 nm UV detector.

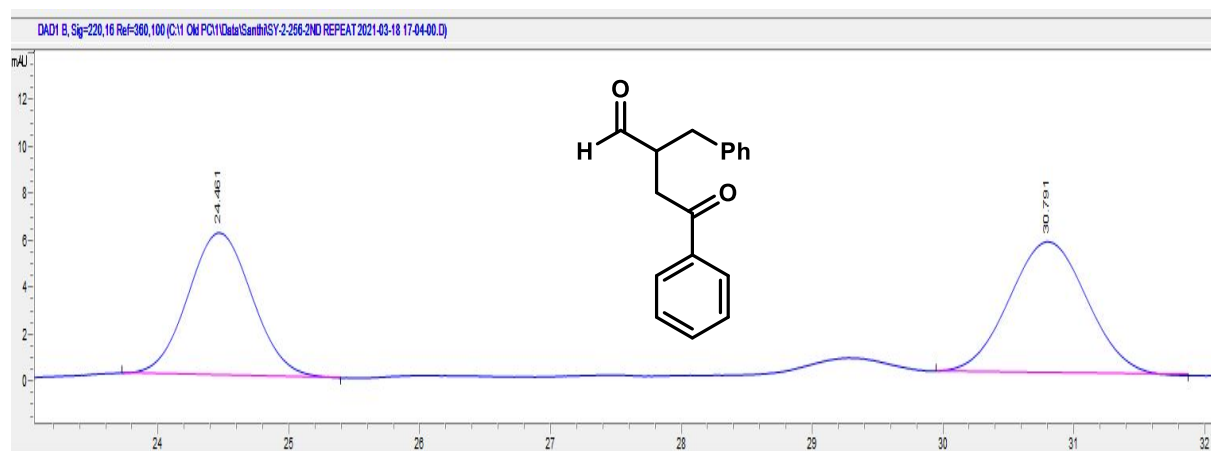

| # | Time   | Type | Area  | Height | Width  | Area%  | Symmetry |
|---|--------|------|-------|--------|--------|--------|----------|
| 1 | 24.461 | BB   | 207.4 | 6.1    | 0.4099 | 47.096 | 0.896    |
| 2 | 30.791 | BB   | 232.9 | 5.6    | 0.4915 | 52.904 | 0.939    |

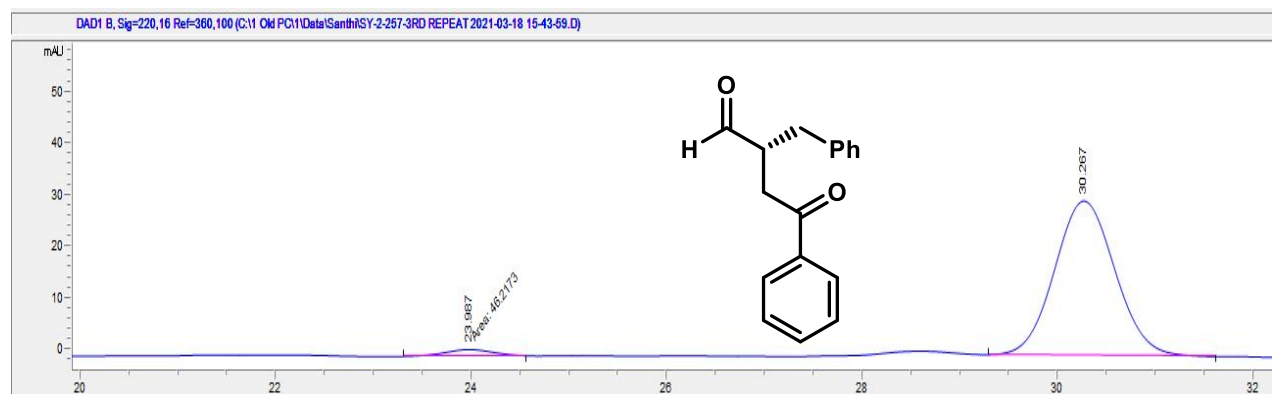

| # | Time   | Type | Area   | Height | Width  | Area%  | Symmetry |
|---|--------|------|--------|--------|--------|--------|----------|
| 1 | 23.987 | MM   | 46.2   | 1.3    | 0.587  | 3.460  | 1.081    |
| 2 | 30.267 | BB   | 1289.4 | 30     | 0.6333 | 96.540 | 0.919    |

## (R)-2-Benzyl-4-oxo-4-(p-tolyl)butanal, 15b

HPLC conditions: Chiralpak IC column (25 cm × 0.46 cm ID), Hex/IPA = 90:10, 1.0 mL/min, 254 nm UV detector.

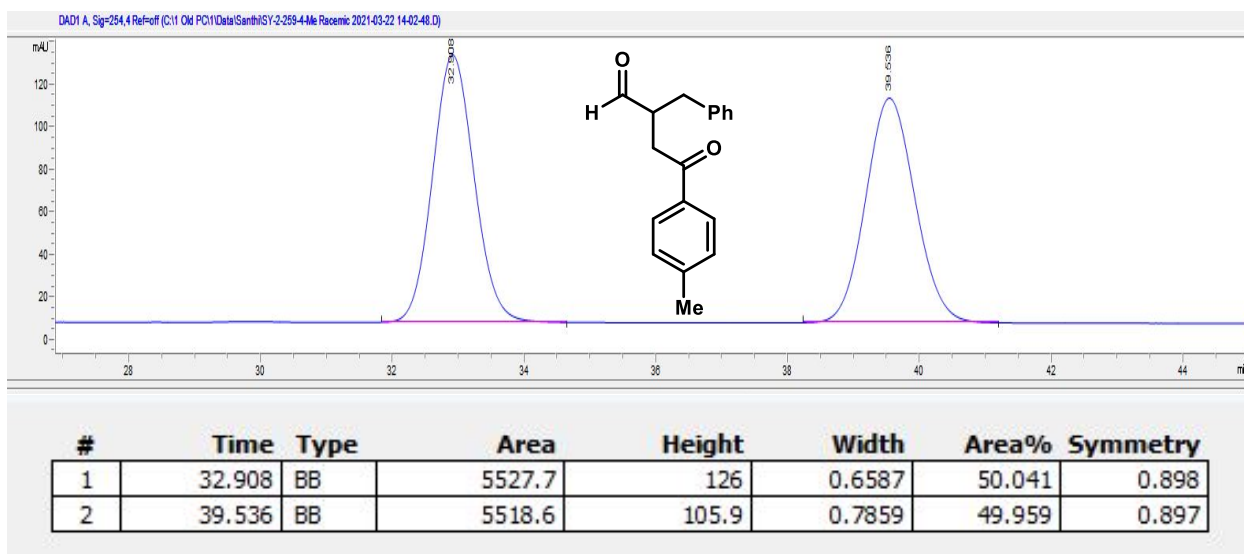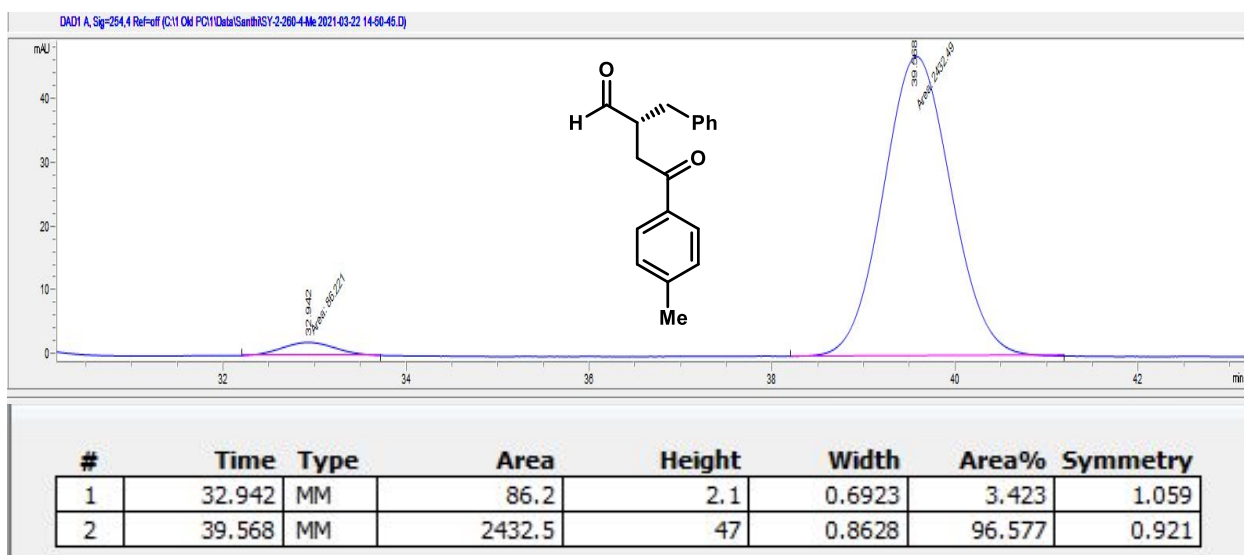

### (R)-2-Benzyl-4-(4-bromophenyl)-4-oxobutanal, 15c:

HPLC conditions: Chiralpak IC column (25 cm × 0.46 cm ID), Hex/IPA = 90:10, 0.8 mL/min, 254 nm UV detector.

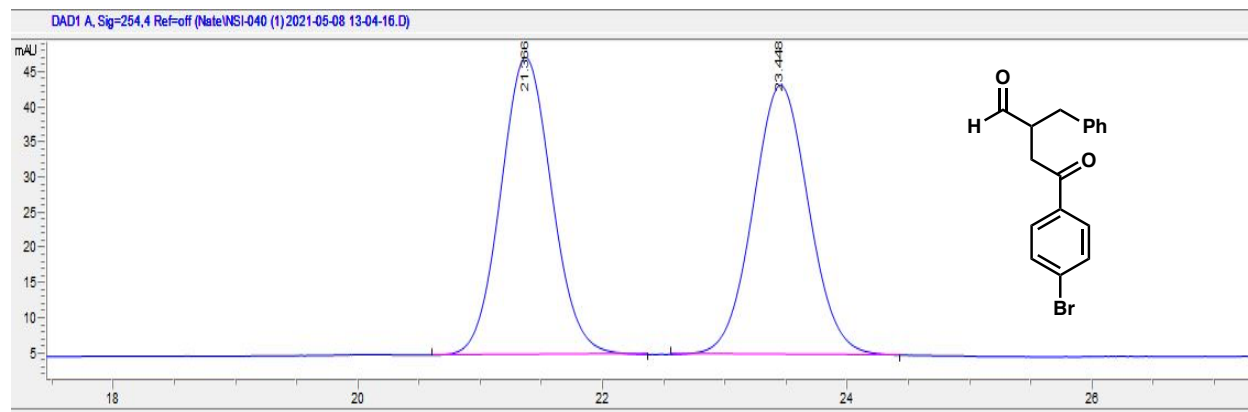

| # | Time   | Type | Area   | Height | Width  | Area%  | Symmetry |
|---|--------|------|--------|--------|--------|--------|----------|
| 1 | 21.366 | BB   | 1230.2 | 42.3   | 0.4442 | 50.215 | 0.921    |
| 2 | 23.448 | BB   | 1219.6 | 38.4   | 0.4768 | 49.785 | 0.946    |

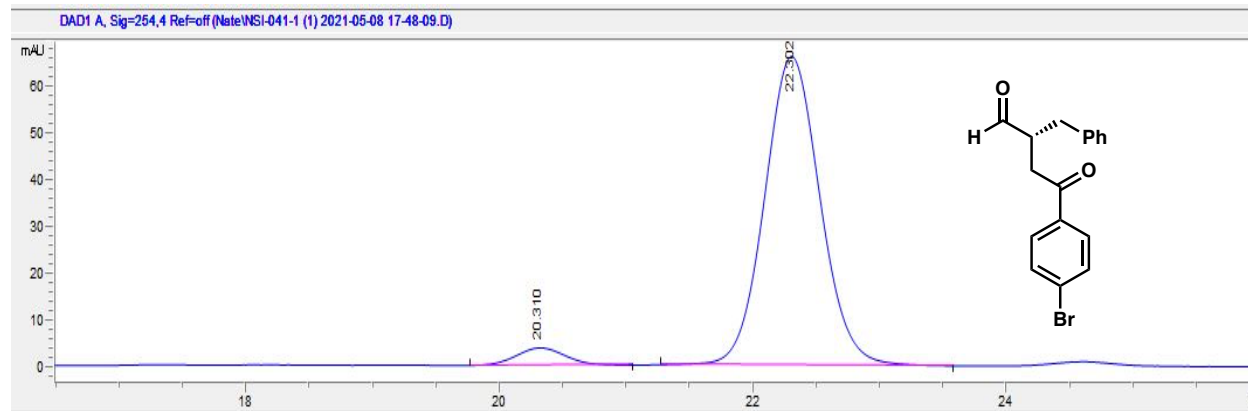

| # | Time   | Type | Area   | Height | Width  | Area%  | Symmetry |
|---|--------|------|--------|--------|--------|--------|----------|
| 1 | 20.31  | BB   | 100.3  | 3.7    | 0.3212 | 4.769  | 0.851    |
| 2 | 22.302 | BB   | 2003.3 | 65.8   | 0.4712 | 95.231 | 0.922    |

**(R)-2-Benzyl-4-(4-chlorophenyl)-4-oxobutanal, 15d:**

HPLC conditions: Chiralpak IC column (25 cm × 0.46 cm ID), Hex/IPA = 90:10, 1.0 mL/min, 254 nm UV detector.

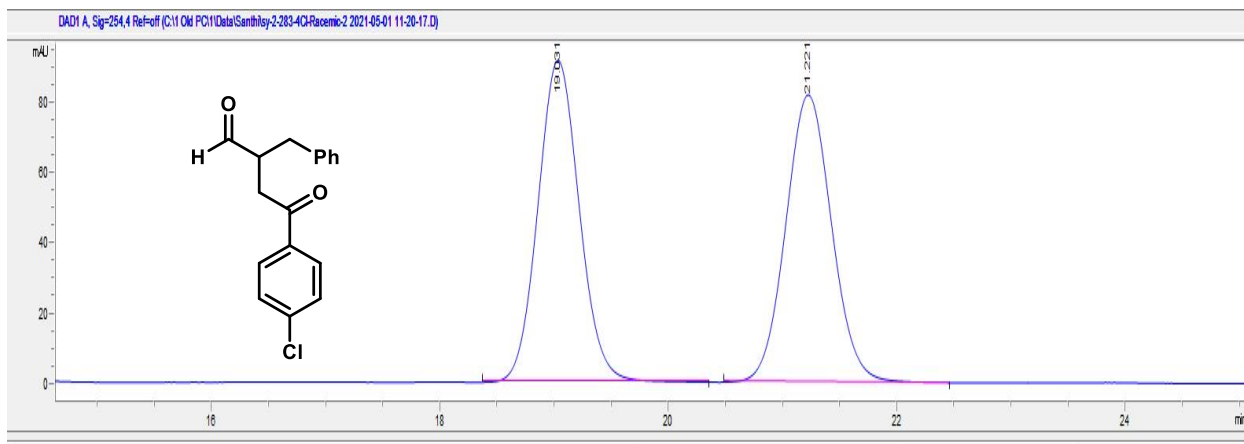

| # | Time   | Type | Area   | Height | Width  | Area%  | Symmetry |
|---|--------|------|--------|--------|--------|--------|----------|
| 1 | 19.031 | BB   | 2311   | 91.7   | 0.3921 | 50.204 | 0.908    |
| 2 | 21.221 | BB   | 2292.2 | 81.8   | 0.4328 | 49.796 | 0.924    |

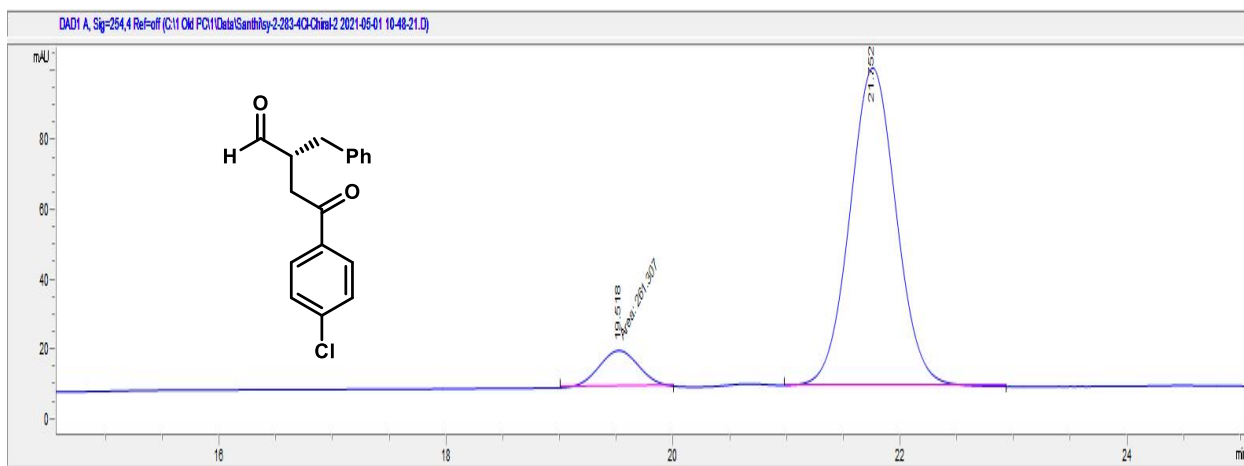

| # | Time   | Type | Area   | Height | Width  | Area%  | Symmetry |
|---|--------|------|--------|--------|--------|--------|----------|
| 1 | 19.518 | MM   | 261.3  | 10.5   | 0.4132 | 9.114  | 1.004    |
| 2 | 21.752 | BB   | 2605.8 | 91.7   | 0.4414 | 90.886 | 0.948    |

**(R)-2-Benzyl-4-(4-fluorophenyl)-4-oxobutanal, 15e:**

HPLC conditions: Chiralpak IC column (25 cm × 0.46 cm ID), Hex/IPA = 90:10, 1.0 mL/min, 254 nm UV detector.

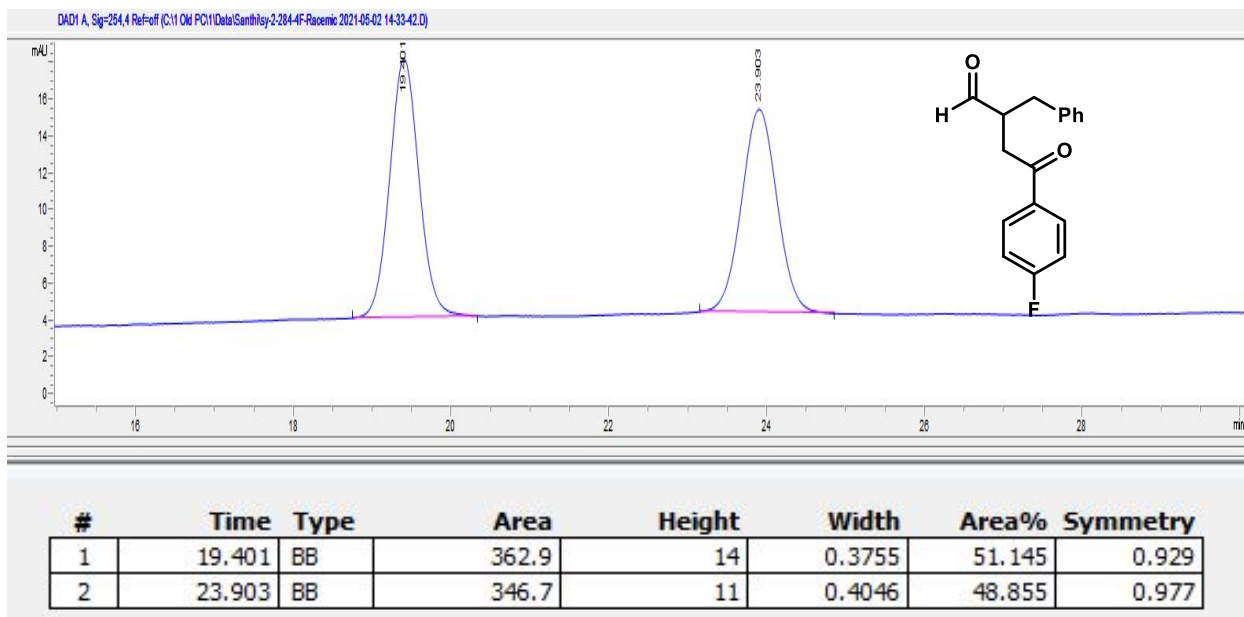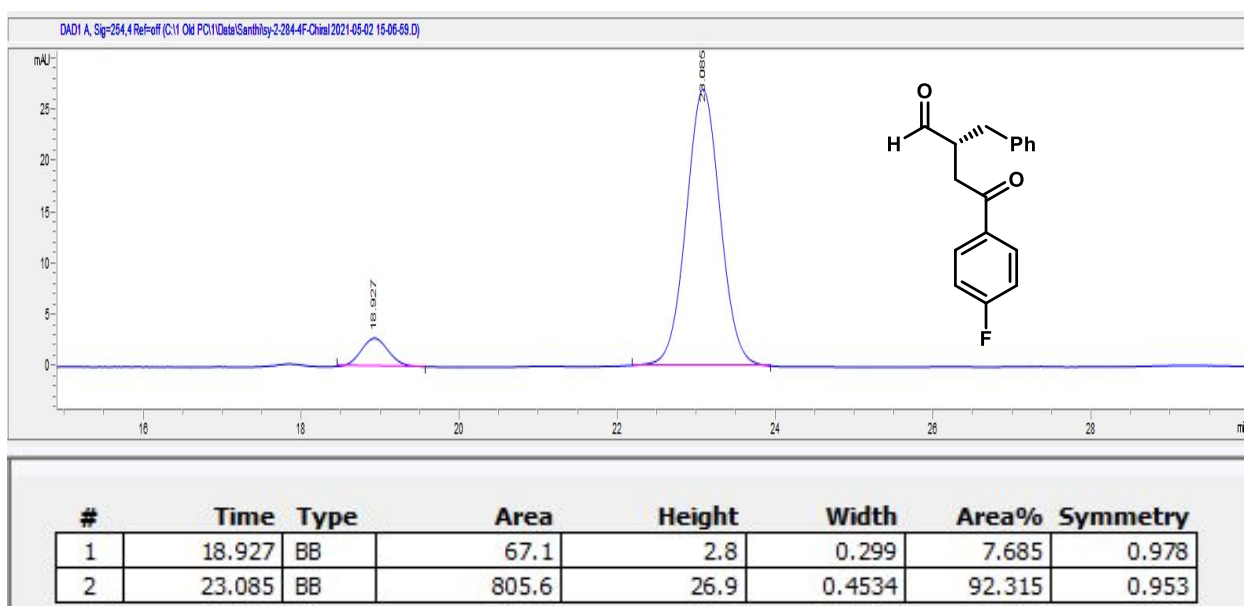

**(R)-2-Benzyl-4-(2-fluorophenyl)-4-oxobutanal, 15f:**

HPLC conditions: Chiralpak IC column (25 cm × 0.46 cm ID), Hex/IPA = 90:10, 0.8 mL/min, 230 nm UV detector.

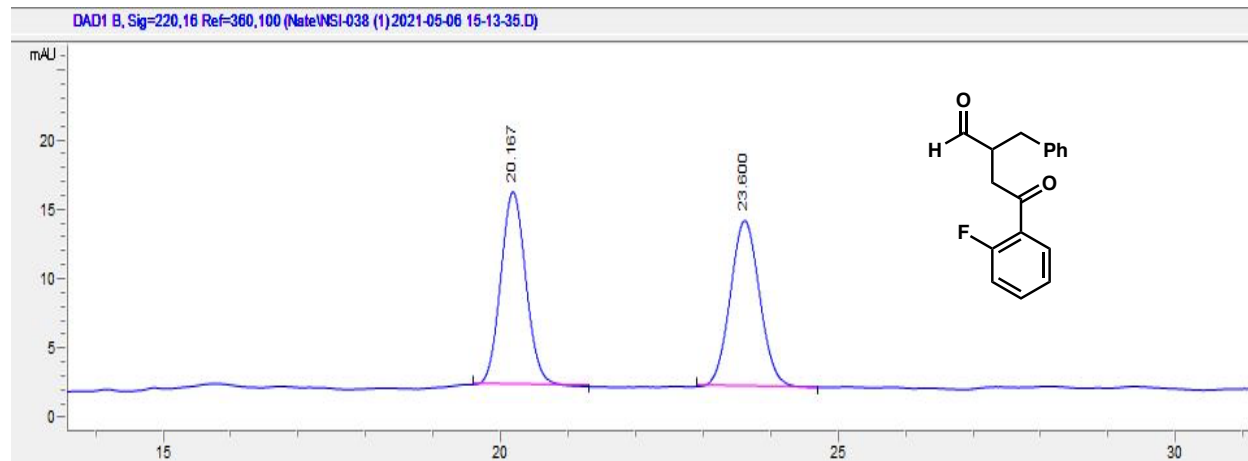

| # | Time   | Type | Area  | Height | Width  | Area%  | Symmetry |
|---|--------|------|-------|--------|--------|--------|----------|
| 1 | 20.167 | BB   | 364.9 | 14     | 0.3974 | 49.879 | 0.908    |
| 2 | 23.6   | BB   | 366.6 | 12     | 0.4423 | 50.121 | 0.934    |

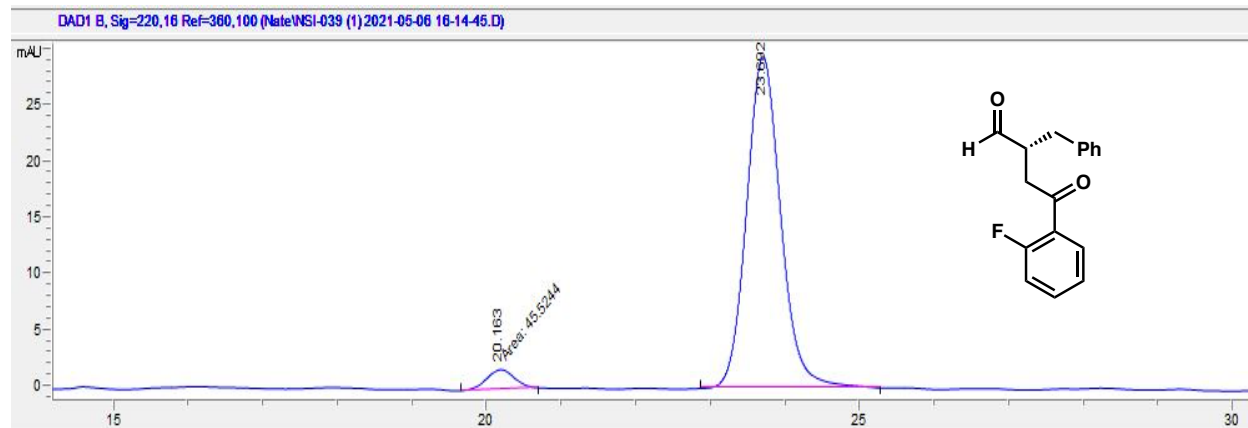

| # | Time   | Type | Area  | Height | Width  | Area%  | Symmetry |
|---|--------|------|-------|--------|--------|--------|----------|
| 1 | 20.163 | MM   | 45.5  | 1.7    | 0.4336 | 4.586  | 0.937    |
| 2 | 23.692 | BB   | 947.2 | 29.6   | 0.4821 | 95.414 | 0.862    |



### (R)-2-Benzyl-3-cyanopropyl benzoate, 15g:

HPLC conditions: Chiralpak IC column (25 cm × 0.46 cm ID), Hex/IPA = 80:20, 0.8 mL/min, 230 nm UV detector.

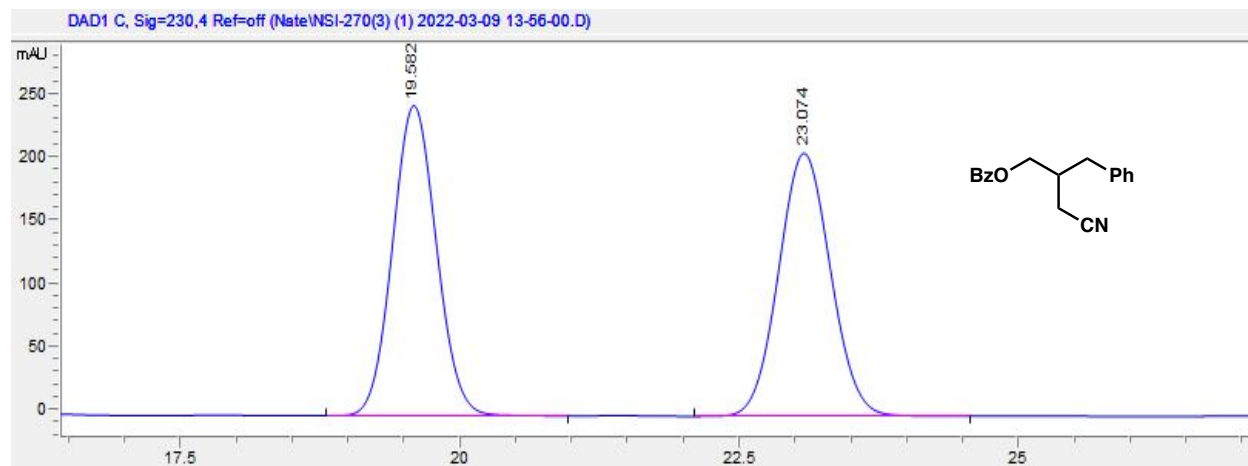

| # | Time   | Type | Area   | Height | Width  | Area%  | Symmetry |
|---|--------|------|--------|--------|--------|--------|----------|
| 1 | 19.582 | BB   | 6688.6 | 244.7  | 0.427  | 49.890 | 0.915    |
| 2 | 23.074 | BB   | 6718.2 | 207.4  | 0.5059 | 50.110 | 0.925    |

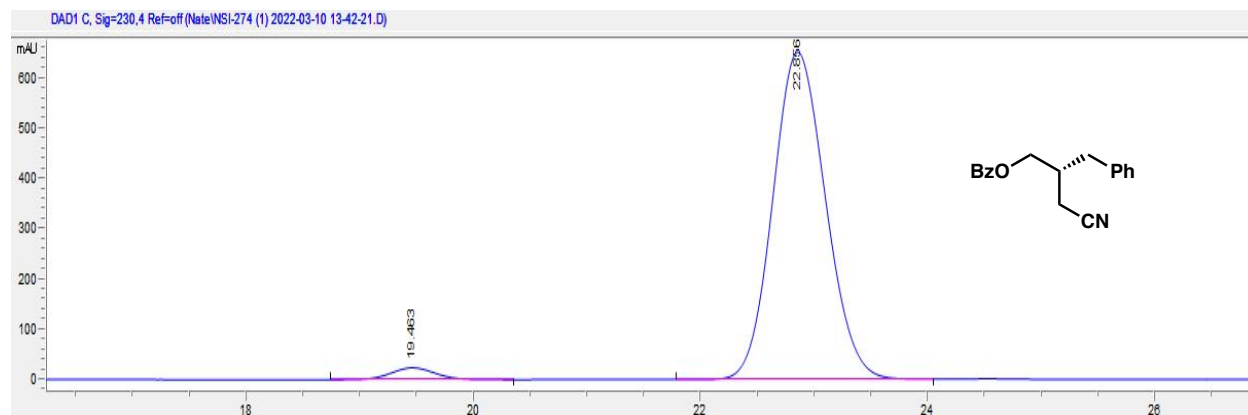

| # | Time   | Type | Area    | Height | Width  | Area%  | Symmetry |
|---|--------|------|---------|--------|--------|--------|----------|
| 1 | 19.463 | BB   | 635.1   | 23.4   | 0.4222 | 2.953  | 0.943    |
| 2 | 22.856 | BB   | 20869.2 | 648.5  | 0.5035 | 97.047 | 0.862    |



**(-)-Enterolactone, 17:**

HPLC conditions: Chiralcel OD-H column (25 cm × 0.46 cm ID), Hex/IPA = 75:25, 0.5 mL/min, 220 nm UV detector.

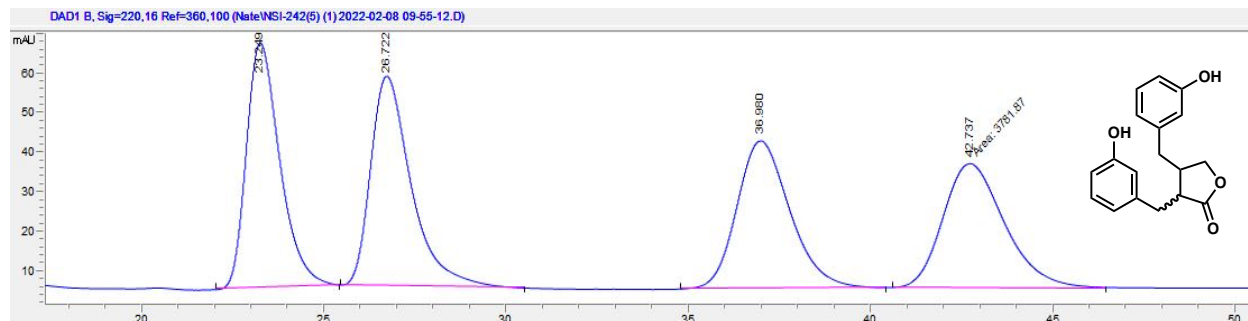

| # | Time   | Type | Area   | Height | Width  | Area%  | Symmetry |
|---|--------|------|--------|--------|--------|--------|----------|
| 1 | 23.249 | BB   | 3980.8 | 62.3   | 0.886  | 25.386 | 0.672    |
| 2 | 26.722 | BB   | 4123.4 | 53.3   | 1.0201 | 26.295 | 0.606    |
| 3 | 36.98  | BB   | 3795   | 37.5   | 1.1892 | 24.201 | 0.767    |
| 4 | 42.737 | MM   | 3781.9 | 31.7   | 1.9869 | 24.117 | 0.742    |

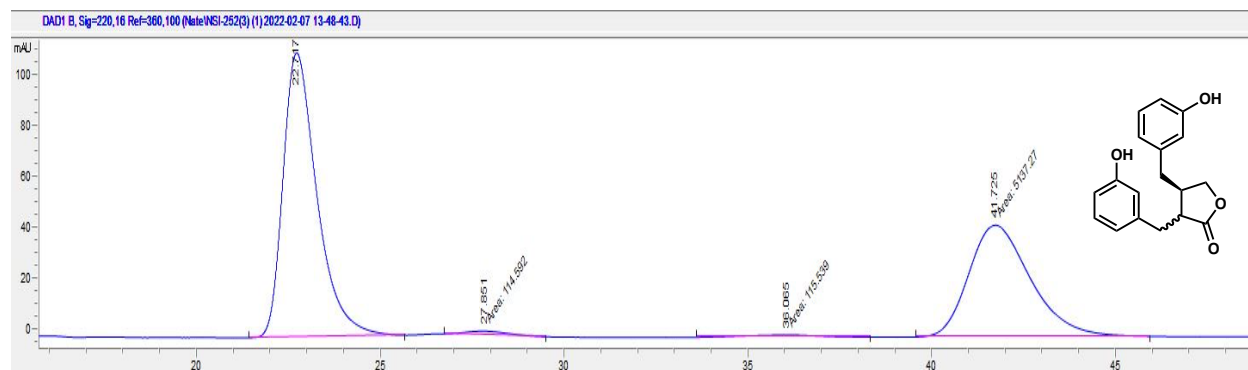

| # | Time   | Type | Area   | Height | Width  | Area%  | Symmetry |
|---|--------|------|--------|--------|--------|--------|----------|
| 1 | 22.717 | BB   | 7187.1 | 112.2  | 0.9416 | 57.247 | 0.633    |
| 2 | 27.851 | MM   | 114.6  | 1.5    | 1.2931 | 0.913  | 0.841    |
| 3 | 36.065 | MM   | 115.5  | 8.7E-1 | 2.218  | 0.920  | 1.31     |
| 4 | 41.725 | MM   | 5137.3 | 44     | 1.9444 | 40.920 | 0.725    |

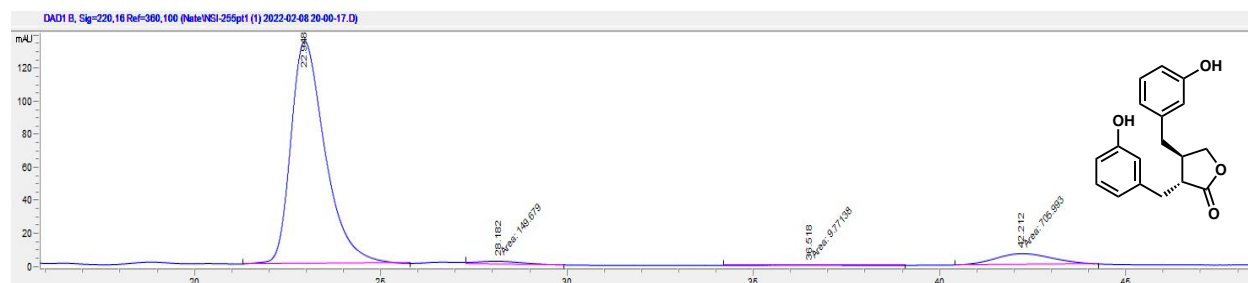

| # | Time   | Type | Area   | Height | Width  | Area%  | Symmetry |
|---|--------|------|--------|--------|--------|--------|----------|
| 1 | 22.948 | BB   | 8659.8 | 135.4  | 0.9252 | 90.914 | 0.635    |
| 2 | 28.182 | MM   | 149.7  | 1.7    | 1.4446 | 1.571  | 0.697    |
| 3 | 36.518 | MM   | 9.8    | 9.9E-2 | 1.638  | 0.103  | 1.097    |
| 4 | 42.212 | MM   | 706    | 6.6    | 1.7786 | 7.412  | 0.874    |

### (-)-Enterodiol, 18:

HPLC conditions: Chiralpak IC column (25 cm × 0.46 cm ID), Hex/IPA = 75:25, 0.7 mL/min, 280 nm UV detector.

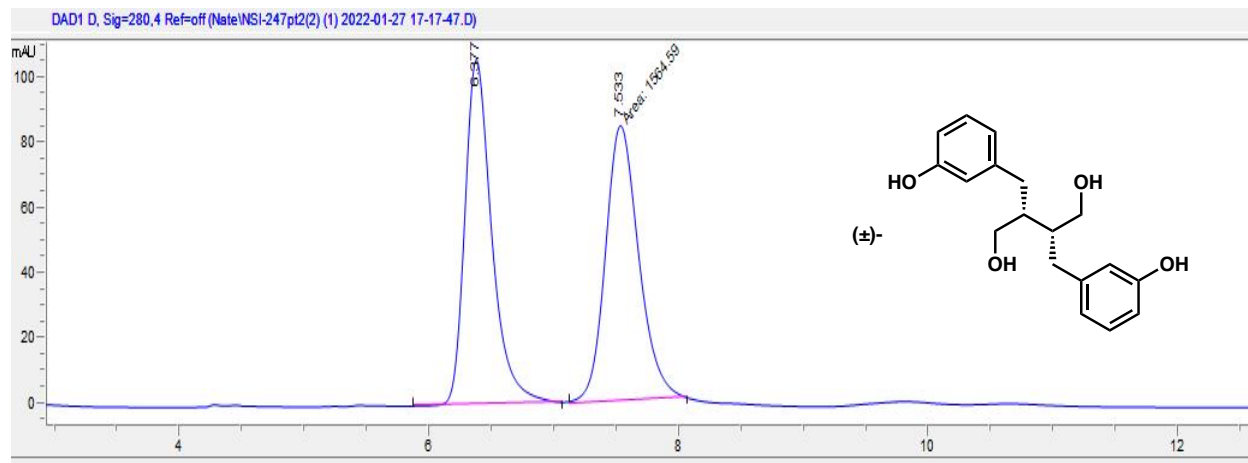

| # | Time  | Type | Area   | Height | Width  | Area%  | Symmetry |
|---|-------|------|--------|--------|--------|--------|----------|
| 1 | 6.377 | BB   | 1582.2 | 105.7  | 0.2267 | 50.280 | 0.685    |
| 2 | 7.533 | MM   | 1564.6 | 84.3   | 0.3092 | 49.720 | 0.812    |

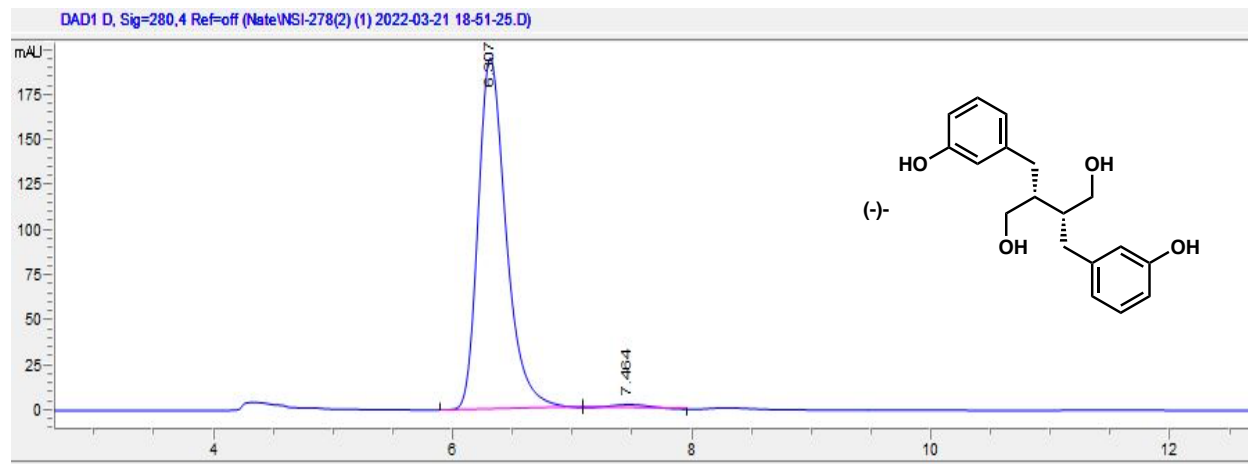

| # | Time  | Type | Area   | Height | Width  | Area%  | Symmetry |
|---|-------|------|--------|--------|--------|--------|----------|
| 1 | 6.307 | BB   | 3157.8 | 194.2  | 0.2477 | 98.558 | 0.708    |
| 2 | 7.464 | BB   | 46.2   | 2      | 0.367  | 1.442  | 0.783    |
